# Supplementary material for: β-Carbonyl sulfonium enables cysteine-specific bioconjugation for activity-based protein profiling in live cells
Source: Royal Society of Chemistry journal article supplement (doi:10.1039/d4cc00295d), 2024-01-01
Supplement: d4cc00295d2.xlsx [file d4cc00295d2.xlsx]

## Sheet: TableSI-1 ModificationSites
Modified cysteine sites by CP2 from MCF-7 cell lysates
Modification Name	Target Amino Acid	Position in Peptide	Site Probability	Protein Accession	Protein Description	Position	Motif
cp2acid	C	13	100	A0A0B4J2D5	Putative glutamine amidotransferase-like class 1 domain-containing protein 3B, mitochondrial	177	KPIGLCcIAPVLA
cp2acid	C	9	100	A4D1F6	Leucine-rich repeat and death domain-containing protein 1	530	IFSEHFcSLINLK
cp2acid	C	3	100	A6NEC2	Puromycin-sensitive aminopeptidase-like protein	339	IDPKNScSSSRQW
cp2acid	C	5	100	A8MUU1	Putative fatty acid-binding protein 5-like protein 3	53	RRTQTVcNFTDGA
cp2acid	C	10	100	A9QM74	Importin subunit alpha-8	227	WTLSNLcRNKNPY
cp2acid	C	5	100	C9JRZ8	Aldo-keto reductase family 1 member B15	200	EKLIQYcHSKGIT
cp2acid	C	10	100	C9JRZ8	Aldo-keto reductase family 1 member B15	187	VTNQVEcHPYLTQ
cp2acid	C	3	100	O00154	Cytosolic acyl coenzyme A thioester hydrolase	288	DKIRKGcVITISG
cp2acid	C	7	100	O00170	AH receptor-interacting protein	208	YYDAIAcLKNLQM
cp2acid	C	2	100	O00204	Sulfotransferase 2B1	225	GSVERIcGFLGRP
cp2acid	C	8	100	O00231	26S proteasome non-ATPase regulatory subunit 11	202	TANAIYcPPKLQA
cp2acid	C	5	100	O00231	26S proteasome non-ATPase regulatory subunit 11	257	LKYMLLcKIMLNT
cp2acid	C	2	100	O00232	26S proteasome non-ATPase regulatory subunit 12	74	VAVVKMcYEAKEW
cp2acid	C	7	100	O00232	26S proteasome non-ATPase regulatory subunit 12	255	AIYDTPcIQAESE
cp2acid	C	4	100	O00232	26S proteasome non-ATPase regulatory subunit 12	31	DQRLPEcAKLAKE
cp2acid	C	2	100	O00232	26S proteasome non-ATPase regulatory subunit 12	193	LEQMRLcLAVKDY
cp2acid	C	6	100	O00264	Membrane-associated progesterone receptor component 1	129	RGLATFcLDKEAL
cp2acid	C	8	100	O00299	Chloride intracellular channel protein 1	191	HIVQVVcKKYRGF
cp2acid	C	4	100	O00299	Chloride intracellular channel protein 1	24	GAKIGNcPFSQRL
cp2acid	C	2	100	O00303	Eukaryotic translation initiation factor 3 subunit F	256	DLIMKTcFSPNRV
cp2acid	C	2	100	O00410	Importin-5	110	SMRKKVcDIAAEL
cp2acid	C	13	100	O00410	Importin-5	733	MPLLLEcARVRGP
cp2acid	C	2	100	O00410	Importin-5	266	QLSLKLcGDTSLN
cp2acid	C	16	100	O00410	Importin-5	473	INFTEDcPKSLLI
cp2acid	C	9	100	O00483	Cytochrome c oxidase subunit NDUFA4	44	LFNPDVcWDRNNP
cp2acid	C	6	100	O00571	ATP-dependent RNA helicase DDX3X	341	KIGLDFcKYLVLD
cp2acid	C	3	100	O14561	Acyl carrier protein, mitochondrial	140	DAEKLMcPQEIVD
cp2acid	C	11	100	O14579	Coatomer subunit epsilon	34	IGSYQQcINEAQR
cp2acid	C	5	100	O14602	Eukaryotic translation initiation factor 1A, Y-chromosomal	51	GRLEALcFDGVKR
cp2acid	C	6	100	O14776	Transcription elongation regulator 1	1062	RYLVLDcVPEERR
cp2acid	C	5	100	O14818	Proteasome subunit alpha type-7	91	NRARVEcQSHRLT
cp2acid	C	3	100	O14818	Proteasome subunit alpha type-7	63	RTVRKIcALDDNV
cp2acid	C	2	100	O14929	Histone acetyltransferase type B catalytic subunit	294	FVLVKLcQDLPCF
cp2acid	C	5	100	O14929	Histone acetyltransferase type B catalytic subunit	168	YKADMTcRGFREY
cp2acid	C	5	100	O14936	Peripheral plasma membrane protein CASK	66	KREASIcHMLKHP
cp2acid	C	6	99.7	O14972	Vacuolar protein sorting-associated protein 26C	221	RVETCGcAEGYAR
cp2acid	C	2	100	O15067	Phosphoribosylformylglycinamidine synthase	270	NNVLKFcDNSSAI
cp2acid	C	9	100	O15067	Phosphoribosylformylglycinamidine synthase	606	LVDDREcPVRRNG
cp2acid	C	6	100	O15067	Phosphoribosylformylglycinamidine synthase	336	RIRDVQcTGRGAH
cp2acid	C	16	100	O15067	Phosphoribosylformylglycinamidine synthase	318	NFPTGVcPFSGAT
cp2acid	C	2	100	O15144	Actin-related protein 2/3 complex subunit 2	120	GMLKRNcFASVFE
cp2acid	C	6	100	O15269	Serine palmitoyltransferase 1	133	KYGVGTcGPRGFY
cp2acid	C	3	100	O15269	Serine palmitoyltransferase 1	192	FVDRAAcFAIQKG
cp2acid	C	8	100	O15344	E3 ubiquitin-protein ligase Midline-1	578	SASWALcRCNNNW
cp2acid	C	2	100	O15371	Eukaryotic translation initiation factor 3 subunit D	404	EWDSRHcNGVDWR
cp2acid	C	5	100	O15372	Eukaryotic translation initiation factor 3 subunit H	177	PKLMEVcKEKDFS
cp2acid	C	4	100	O15439	ATP-binding cassette sub-family C member 4	1186	GQRQLVcLARAIL
cp2acid	C	11	100	O15533	Tapasin	115	LTPAQNcPRALDG
cp2acid	C	8	100	O43169	Cytochrome b5 type B	119	PSKNDTcKSCWAY
cp2acid	C	4	100	O43242	26S proteasome non-ATPase regulatory subunit 3	483	HQRISFcLDIHNM
cp2acid	C	3	100	O43396	Thioredoxin-like protein 1	135	FINKAGcECLNES
cp2acid	C	11	100	O43598	2'-deoxynucleoside 5'-phosphate N-hydrolase 1	26	RPALYFcGSIRGG
cp2acid	C	3	100	O43598	2'-deoxynucleoside 5'-phosphate N-hydrolase 1	117	FNKRILcLFRPQS
cp2acid	C	10	100	O43707	Alpha-actinin-4	879	PDQAEYcIARMAP
cp2acid	C	7	100	O43707	Alpha-actinin-4	173	EGLLLWcQRKTAP
cp2acid	C	2	100	O43707	Alpha-actinin-4	499	TRCQKIcDQWDAL
cp2acid	C	7	100	O43707	Alpha-actinin-4	60	KTFTAWcNSHLRK
cp2acid	C	3	100	O43708	Maleylacetoacetate isomerase	16	SYFRSScSWRVRI
cp2acid	C	6	100	O43747	AP-1 complex subunit gamma-1	353	RSTIVDcLKDLDV
cp2acid	C	5	100	O43760	Synaptogyrin-2	68	NRNEDAcRYGSAI
cp2acid	C	4	100	O43760	Synaptogyrin-2	59	ESKQMYcVFNRNE
cp2acid	C	7	100	O43772	Mitochondrial carnitine/acylcarnitine carrier protein	155	YTGTLDcAKKLYQ
cp2acid	C	5	100	O43813	Glutathione S-transferase LANCL1	133	EKQAEDcITRLIH
cp2acid	C	5	100	O43813	Glutathione S-transferase LANCL1	98	VKQSLNcLTKRSI
cp2acid	C	8	99.6	O43865	S-adenosylhomocysteine hydrolase-like protein 1	292	KFDNLYcCRESIL
cp2acid	C	4	100	O60218	Aldo-keto reductase family 1 member B10	45	GYRHIDcAYVYQN
cp2acid	C	5	100	O60218	Aldo-keto reductase family 1 member B10	200	EKLIQYcHSKGIT
cp2acid	C	2	100	O60218	Aldo-keto reductase family 1 member B10	299	NRNWRAcNVLQSS
cp2acid	C	10	100	O60218	Aldo-keto reductase family 1 member B10	187	VTNQVEcHPYLTQ
cp2acid	C	3	100	O60443	Gasdermin-E	45	KKKRFWcWQRPKY
cp2acid	C	8	100	O60506	Heterogeneous nuclear ribonucleoprotein Q	211	YAFVTFcTKEAAQ
cp2acid	C	5	100	O60506	Heterogeneous nuclear ribonucleoprotein Q	96	NKSAFLcGVMKTY
cp2acid	C	3	100	O60506	Heterogeneous nuclear ribonucleoprotein Q	289	KKNRGFcFLEYED
cp2acid	C	5	100	O60701	UDP-glucose 6-dehydrogenase	112	LKYIEAcARRIVQ
cp2acid	C	6	100	O60701	UDP-glucose 6-dehydrogenase	64	KEVVEScRGKNLF
cp2acid	C	9	100	O60701	UDP-glucose 6-dehydrogenase	276	VGFGGScFQKDVL
cp2acid	C	4	100	O60841	Eukaryotic translation initiation factor 5B	853	SKRLAHcEELRAQ
cp2acid	C	6	100	O60884	DnaJ homolog subfamily A member 2	308	KVIEPGcVRVVRG
cp2acid	C	4	100	O75083	WD repeat-containing protein 1	194	HSRFVNcVRFSPD
cp2acid	C	8	100	O75131	Copine-3	249	SPVEFEcINEKKR
cp2acid	C	4	100	O75131	Copine-3	54	TERIKNcLNPQFS
cp2acid	C	7	100	O75131	Copine-3	15	VALNVScANLLDK
cp2acid	C	5	100	O75131	Copine-3	5	MAAQcVTKVAL
cp2acid	C	8	100	O75223	Gamma-glutamylcyclotransferase	42	PSAAFFcVARLQD
cp2acid	C	11	100	O75369	Filamin-B	604	DQNDGScDVKYWP
cp2acid	C	2	100	O75369	Filamin-B	26	NTFTRWcNEHLKC
cp2acid	C	7	100	O75369	Filamin-B	1326	VAVTEGcQPSRVQ
cp2acid	C	7	100	O75390	Citrate synthase, mitochondrial	101	GFSIPEcQKLLPK
cp2acid	C	3	100	O75390	Citrate synthase, mitochondrial	211	LIAKLPcVAAKIY
cp2acid	C	2	100	O75531	Barrier-to-autointegration factor	77	AKQSRDcFGCLRE
cp2acid	C	3	100	O75663	TIP41-like protein	87	GMLKVAcAEEWQE
cp2acid	C	7	100	O75688	Protein phosphatase 1B	149	HIYFINcGDSRAV
cp2acid	C	12	100	O75746	Calcium-binding mitochondrial carrier protein Aralar1	563	YSGVIDcFRKILR
cp2acid	C	9	100	O75874	Isocitrate dehydrogenase [NADP] cytoplasmic	269	GGFIWAcKNYDGD
cp2acid	C	5	100	O75874	Isocitrate dehydrogenase [NADP] cytoplasmic	114	FREAIIcKNIPRL
cp2acid	C	6	100	O75884	Serine hydrolase RBBP9	39	KIPGFQcLAKNMP
cp2acid	C	7	100	O75886	Signal transducing adapter molecule 2	85	IFHLEVcSRDFAT
cp2acid	C	5	100	O75925	E3 SUMO-protein ligase PIAS1	335	LRVSLLcPLGKMR
cp2acid	C	7	100	O76003	Glutaredoxin-3	146	LTHAAPcMLFMKG
cp2acid	C	4	100	O94776	Metastasis-associated protein MTA2	209	FARALDcSSSIRQ
cp2acid	C	2	100	O94855	Protein transport protein Sec24D	853	NCLLKNcVLLSRP
cp2acid	C	8	100	O95219	Sorting nexin-4	172	ASHPILcRDKIFY
cp2acid	C	2	100	O95249	Golgi SNAP receptor complex member 1	34	VSFSKLcTSYSHS
cp2acid	C	4	100	O95336	6-phosphogluconolactonase	33	AQRAACcLAGARA
cp2acid	C	3	100	O95372	Acyl-protein thioesterase 2	56	PHVKYIcPHAPRI
cp2acid	C	12	100	O95373	Importin-7	736	AGEDAEcHAAKLL
cp2acid	C	5	100	O95456	Proteasome assembly chaperone 1	157	EKVFGScPRKNMQ
cp2acid	C	6	100	O95456	Proteasome assembly chaperone 1	106	KLWNEWcRTTDTT
cp2acid	C	3	100	O95476	CTD nuclear envelope phosphatase 1	6	MMRTQcLLGLRT
cp2acid	C	7	100	O95571	Persulfide dioxygenase ETHE1, mitochondrial	170	TDFQQGcAKTLYH
cp2acid	C	4	100	O95671	Probable bifunctional dTTP/UTP pyrophosphatase/methyltransferase protein	4	MVLcPVIGKL
cp2acid	C	5	100	O95757	Heat shock 70 kDa protein 4L	270	LRLYQEcEKLKKL
cp2acid	C	2	100	O95757	Heat shock 70 kDa protein 4L	376	EAVARGcALQCAI
cp2acid	C	3	100	O95989	Diphosphoinositol polyphosphate phosphohydrolase 1	68	AAVREVcEEAGVK
cp2acid	C	3	100	O95989	Diphosphoinositol polyphosphate phosphohydrolase 1	23	YKKRAAcLCFRSE
cp2acid	C	15	100	O95994	Anterior gradient protein 2 homolog	81	IHHLDEcPHSQAL
cp2acid	C	4	100	O96005	Cleft lip and palate transmembrane protein 1	308	PLRVSFcPLSLWR
cp2acid	C	8	100	P00338	L-lactate dehydrogenase A chain	163	RVIGSGcNLDSAR
cp2acid	C	5	100	P00338	L-lactate dehydrogenase A chain	131	VKYSPNcKLLIVS
cp2acid	C	5	100	P00352	Aldehyde dehydrogenase 1A1	133	IKTLRYcAGWADK
cp2acid	C	7	100	P00352	Aldehyde dehydrogenase 1A1	186	IGPALScGNTVVV
cp2acid	C	13	100	P00352	Aldehyde dehydrogenase 1A1	50	ATEEELcQVEEGD
cp2acid	C	7	100	P00352	Aldehyde dehydrogenase 1A1	370	EGAKLEcGGGPWG
cp2acid	C	13	100	P00352	Aldehyde dehydrogenase 1A1	126	LNDLAGcIKTLRY
cp2acid	C	9	100	P00491	Purine nucleoside phosphorylase	31	PQVAIIcGSGLGG
cp2acid	C	2	100	P00491	Purine nucleoside phosphorylase	78	FLNGRAcVMMQGR
cp2acid	C	5	100	P00492	Hypoxanthine-guanine phosphoribosyltransferase	106	IRLKSYcNDQSTG
cp2acid	C	8	100	P00505	Aspartate aminotransferase, mitochondrial	295	GAFTMVcKDADEA
cp2acid	C	16	100	P00505	Aspartate aminotransferase, mitochondrial	106	GGLAEFcKASAEL
cp2acid	C	2	100	P00558	Phosphoglycerate kinase 1	367	KATSRGcITIIGG
cp2acid	C	9	100	P00558	Phosphoglycerate kinase 1	50	VPSIKFcLDNGAK
cp2acid	C	2	100	P00558	Phosphoglycerate kinase 1	99	VLFLKDcVGPEVE
cp2acid	C	19	100	P00558	Phosphoglycerate kinase 1	316	GWMGLDcGPESSK
cp2acid	C	2	100	P00558	Phosphoglycerate kinase 1	108	PEVEKAcANPAAG
cp2acid	C	7	100	P02545	Prelamin-A/C	522	AQNTWGcGNSLRT
cp2acid	C	2	100	P04075	Fructose-bisphosphate aldolase A	202	DHDLKRcQYVTEK
cp2acid	C	5	100	P04075	Fructose-bisphosphate aldolase A	178	ARYASIcQQNGIV
cp2acid	C	25	100	P04075	Fructose-bisphosphate aldolase A	240	VTPGHAcTQKFSH
cp2acid	C	8	100	P04075	Fructose-bisphosphate aldolase A	339	LANSLAcQGKYTP
cp2acid	C	13	100	P04083	Annexin A1	263	KGDIEKcLTAIVK
cp2acid	C	6	100	P04083	Annexin A1	343	KILVALcGGN
cp2acid	C	11	100	P04406	Glyceraldehyde-3-phosphate dehydrogenase	156	ASCTTNcLAPLAK
cp2acid	C	7	100	P04406	Glyceraldehyde-3-phosphate dehydrogenase	152	IISNAScTTNCLA
cp2acid	C	13	100	P04406	Glyceraldehyde-3-phosphate dehydrogenase	247	SVVDLTcRLEKPA
cp2acid	C	9	100	P04632	Calpain small subunit 1	144	GFGIDTcRSMVAV
cp2acid	C	9	100	P04843	Dolichyl-diphosphooligosaccharide--protein glycosyltransferase subunit 1	545	TEGSDLcDRVSEM
cp2acid	C	2	100	P04844	Dolichyl-diphosphooligosaccharide--protein glycosyltransferase subunit 2	72	PDAKKAcTYIRSN
cp2acid	C	7	100	P05023	Sodium/potassium-transporting ATPase subunit alpha-1	211	IISANGcKVDNSS
cp2acid	C	9	100	P05023	Sodium/potassium-transporting ATPase subunit alpha-1	249	AFFSTNcVEGTAR
cp2acid	C	3	100	P05091	Aldehyde dehydrogenase, mitochondrial	386	EGAKLLcGGGIAA
cp2acid	C	12	100	P05386	60S acidic ribosomal protein P1	61	NIGSLIcNVGAGG
cp2acid	C	11	100	P05388	60S acidic ribosomal protein P0	27	LDDYPKcFIVGAD
cp2acid	C	7	100	P05388	60S acidic ribosomal protein P0	119	AGAIAPcEVTVPA
cp2acid	C	6	100	P05388	60S acidic ribosomal protein P0	226	RNVASVcLQIGYP
cp2acid	C	10	100	P05455	Lupus La protein	245	DLDDQTcREDLHI
cp2acid	C	3	100	P05455	Lupus La protein	232	LEEKIGcLLKFSG
cp2acid	C	9	100	P06132	Uroporphyrinogen decarboxylase	59	QDFFSTcRSPEAC
cp2acid	C	13	100	P06493	Cyclin-dependent kinase 1	119	LQGIVFcHSRRVL
cp2acid	C	4	100	P06733	Alpha-enolase	339	NEKSCNcLLLKVN
cp2acid	C	2	100	P06733	Alpha-enolase	337	AVNEKScNCLLLK
cp2acid	C	5	100	P06744	Glucose-6-phosphate isomerase	133	DKMKSFcQRVRSG
cp2acid	C	4	100	P06744	Glucose-6-phosphate isomerase	404	GTKMIPcDFLIPV
cp2acid	C	9	100	P07099	Epoxide hydrolase 1	80	PPLEDScFHYGFN
cp2acid	C	6	100	P07195	L-lactate dehydrogenase B chain	164	RVIGSGcNLDSAR
cp2acid	C	5	100	P07237	Protein disulfide-isomerase	343	ERITEFcHRFLEG
cp2acid	C	4	100	P07237	Protein disulfide-isomerase	312	GLKKEEcPAVRLI
cp2acid	C	6	100	P07355	Annexin A2	335	KALLYLcGGDD
cp2acid	C	14	100	P07355	Annexin A2	133	SLIEIIcSRTNQE
cp2acid	C	9	100	P07355	Annexin A2	9	TVHEILcKLSLEG
cp2acid	C	4	100	P07384	Calpain-1 catalytic subunit	351	FTRLEIcNLTPDA
cp2acid	C	7	100	P07384	Calpain-1 catalytic subunit	384	GSTAGGcRNYPAT
cp2acid	C	6	100	P07437	Tubulin beta chain	303	KNMMAAcDPRHGR
cp2acid	C	4	100	P07437	Tubulin beta chain	354	NVKTAVcDIPPRG
cp2acid	C	15	100	P07737	Profilin-1	71	TLGGQKcSVIRDS
cp2acid	C	2	100	P07737	Profilin-1	128	GLINKKcYEMASH
cp2acid	C	6	100	P07858	Cathepsin B	93	REQWPQcPTIKEI
cp2acid	C	5	100	P07900	Heat shock protein HSP 90-alpha	572	TKFENLcKIMKDI
cp2acid	C	4	100	P07910	Heterogeneous nuclear ribonucleoproteins C1/C2	46	YGKIVGcSVHKGF
cp2acid	C	3	100	P07919	Cytochrome b-c1 complex subunit 6, mitochondrial	37	TTVREQcEQLEKC
cp2acid	C	6	100	P08133	Annexin A6	59	RQRQEVcQSYKSL
cp2acid	C	6	100	P08133	Annexin A6	552	RFMTILcTRSYPH
cp2acid	C	2	100	P08195	4F2 cell-surface antigen heavy chain	431	ATGNRWcSWSLSQ
cp2acid	C	7	100	P08238	Heat shock protein HSP 90-beta	564	AKFENLcKLMKEI
cp2acid	C	6	100	P08559	Pyruvate dehydrogenase E1 component subunit alpha, somatic form, mitochondrial	273	RFAAAYcRSGKGP
cp2acid	C	3	100	P08574	Cytochrome c1, heme protein, mitochondrial	271	QIAKDVcTFLRWA
cp2acid	C	3	100	P08708	40S ribosomal protein S17	35	HTNKRVcEEIAII
cp2acid	C	20	100	P08865	40S ribosomal protein SA	148	LPTIALcNTDSPL
cp2acid	C	8	100	P08865	40S ribosomal protein SA	163	VDIAIPcNNKGAH
cp2acid	C	2	100	P09104	Gamma-enolase	337	AVEEKAcNCLLLK
cp2acid	C	14	100	P09104	Gamma-enolase	357	TEAIQAcKLAQEN
cp2acid	C	3	100	P09211	Glutathione S-transferase P	48	GSLKAScLYGQLP
cp2acid	C	4	100	P09234	U1 small nuclear ribonucleoprotein C	25	SVRKTHcSGRKHK
cp2acid	C	10	100	P09429	High mobility group protein B1	106	SAFFLFcSEYRPK
cp2acid	C	2	100	P09496	Clathrin light chain A	218	ERVARLcDFNPKS
cp2acid	C	8	100	P09525	Annexin A4	108	AGTDEGcLIEILA
cp2acid	C	6	100	P09525	Annexin A4	198	KFLTVLcSRNRNH
cp2acid	C	3	100	P09543	2',3'-cyclic-nucleotide 3'-phosphodiesterase	158	TAWRLDcAQLKEK
cp2acid	C	12	100	P09651	Heterogeneous nuclear ribonucleoprotein A1	43	WGTLTDcVVMRDP
cp2acid	C	9	100	P09651	Heterogeneous nuclear ribonucleoprotein A1	175	TVNGHNcEVRKAL
cp2acid	C	7	100	P09936	Ubiquitin carboxyl-terminal hydrolase isozyme L1	220	FSAVALcKAA
cp2acid	C	7	100	P09936	Ubiquitin carboxyl-terminal hydrolase isozyme L1	90	QTIGNScGTIGLI
cp2acid	C	2	100	P09960	Leukotriene A-4 hydrolase	543	FRWLRLcIQSKWE
cp2acid	C	5	100	P09960	Leukotriene A-4 hydrolase	147	CRAILPcQDTPSV
cp2acid	C	7	100	P0C024	Peroxisomal coenzyme A diphosphatase NUDT7	72	RAPGEVcFPGGKR
cp2acid	C	5	100	P0DMV9	Heat shock 70 kDa protein 1B	267	RRLRTAcERAKRT
cp2acid	C	7	100	P0DMV9	Heat shock 70 kDa protein 1B	306	ARFEELcSDLFRS
cp2acid	C	6	100	P10109	Adrenodoxin, mitochondrial	155	RLGCQIcLTKSMD
cp2acid	C	2	100	P10301	Ras-related protein R-Ras	70	DSYTKIcSVDGIP
cp2acid	C	9	100	P10620	Microsomal glutathione S-transferase 1	50	FANPEDcVAFGKG
cp2acid	C	5	100	P10644	cAMP-dependent protein kinase type I-alpha regulatory subunit	362	ERVLGPcSDILKR
cp2acid	C	14	100	P10768	S-formylglutathione hydrolase	181	ICNPVLcPWGKKA
cp2acid	C	4	100	P10809	60 kDa heat shock protein, mitochondrial	237	TSKGQKcEFQDAY
cp2acid	C	5	100	P11142	Heat shock cognate 71 kDa protein	267	RRLRTAcERAKRT
cp2acid	C	2	100	P11142	Heat shock cognate 71 kDa protein	603	KELEKVcNPIITK
cp2acid	C	6	100	P11387	DNA topoisomerase 1	733	RITVAWcKKWGVP
cp2acid	C	5	100	P11413	Glucose-6-phosphate 1-dehydrogenase	232	NRDNIAcVILTFK
cp2acid	C	6	100	P11413	Glucose-6-phosphate 1-dehydrogenase	158	KNIHEScMSQIGW
cp2acid	C	15	100	P11413	Glucose-6-phosphate 1-dehydrogenase	385	DIFHQQcKRNELV
cp2acid	C	4	100	P11413	Glucose-6-phosphate 1-dehydrogenase	13	LSRTQVcGILREE
cp2acid	C	6	100	P11766	Alcohol dehydrogenase class-3	282	RAALEAcHKGWGV
cp2acid	C	3	100	P11940	Polyadenylate-binding protein 1	132	LSCKVVcDENGSK
cp2acid	C	6	100	P11940	Polyadenylate-binding protein 1	339	KGFGFVcFSSPEE
cp2acid	C	9	100	P12004	Proliferating cell nuclear antigen	62	GFDTYRcDRNLAM
cp2acid	C	13	100	P12004	Proliferating cell nuclear antigen	162	DAVVIScAKDGVK
cp2acid	C	2	100	P12814	Alpha-actinin-1	480	ARCQKIcDQWDNL
cp2acid	C	10	100	P12814	Alpha-actinin-1	860	PDQAEYcIARMAP
cp2acid	C	7	100	P12814	Alpha-actinin-1	154	EGLLLWcQRKTAP
cp2acid	C	7	100	P12814	Alpha-actinin-1	41	KTFTAWcNSHLRK
cp2acid	C	5	100	P12931	Proto-oncogene tyrosine-protein kinase Src	248	HRLTTVcPTSKPQ
cp2acid	C	2	100	P12955	Xaa-Pro dipeptidase	58	EETQRYcTDTGVL
cp2acid	C	6	100	P12955	Xaa-Pro dipeptidase	243	RHSSYTcICGSGE
cp2acid	C	10	100	P12955	Xaa-Pro dipeptidase	158	TDSGSVcREASFD
cp2acid	C	10	100	P12956	X-ray repair cross-complementing protein 6	398	KEVAALcRYTPRR
cp2acid	C	8	100	P13010	X-ray repair cross-complementing protein 5	346	FSVLGFcKSSQVQ
cp2acid	C	7	100	P13010	X-ray repair cross-complementing protein 5	249	HSIHWPcRLTIGS
cp2acid	C	4	100	P13010	X-ray repair cross-complementing protein 5	493	FQRLFQcLLHRAL
cp2acid	C	4	100	P13489	Ribonuclease inhibitor	38	VVRLDDcGLTEAR
cp2acid	C	5	100	P13639	Elongation factor 2	693	TKEGALcEENMRG
cp2acid	C	2	100	P13639	Elongation factor 2	728	IPTARRcLYASVL
cp2acid	C	4	100	P13639	Elongation factor 2	651	EARKIWcFGPDGT
cp2acid	C	11	100	P13639	Elongation factor 2	591	EESNVLcLSKSPN
cp2acid	C	9	100	P13639	Elongation factor 2	41	LTDSLVcKAGIIA
cp2acid	C	13	100	P13797	Plastin-3	349	QADKLGcRQFVTP
cp2acid	C	5	100	P13797	Plastin-3	463	MKKLENcNYAVEL
cp2acid	C	9	100	P13797	Plastin-3	167	GDGIVLcKMINLS
cp2acid	C	6	100	P13804	Electron transfer flavoprotein subunit alpha, mitochondrial	68	KVAQDLcKVAGIA
cp2acid	C	9	100	P13804	Electron transfer flavoprotein subunit alpha, mitochondrial	155	YAGNALcTVKCDE
cp2acid	C	8	100	P13804	Electron transfer flavoprotein subunit alpha, mitochondrial	109	FNYTHIcAGASAF
cp2acid	C	7	100	P13804	Electron transfer flavoprotein subunit alpha, mitochondrial	53	LGGEVScLVAGTK
cp2acid	C	3	100	P13984	General transcription factor IIF subunit 2	116	VVQRAEcRPAASE
cp2acid	C	3	100	P14174	Macrophage migration inhibitory factor	81	SYSKLLcGLLAER
cp2acid	C	10	100	P14324	Farnesyl pyrophosphate synthase	333	DIQDNKcSWLVVQ
cp2acid	C	5	100	P14550	Aldo-keto reductase family 1 member A1	5	MAAScVLLHTG
cp2acid	C	16	100	P14618	Pyruvate kinase PKM	358	VLDGADcIMLSGE
cp2acid	C	7	100	P14618	Pyruvate kinase PKM	326	AGKPVIcATQMLE
cp2acid	C	7	100	P14618	Pyruvate kinase PKM	474	GIFPVLcKDPVQE
cp2acid	C	6	100	P14618	Pyruvate kinase PKM	49	RNTGIIcTIGPAS
cp2acid	C	6	100	P14625	Endoplasmin	645	RLTESPcALVASQ
cp2acid	C	3	100	P14625	Endoplasmin	138	LTVKIKcDKEKNL
cp2acid	C	7	100	P14678	Small nuclear ribonucleoprotein-associated proteins B and B'	43	HMNLILcDCDEFR
cp2acid	C	6	100	P14735	Insulin-degrading enzyme	904	KKLSAEcAKYWGE
cp2acid	C	2	100	P14868	Aspartate--tRNA ligase, cytoplasmic	76	RAKGKQcFLVLRQ
cp2acid	C	6	100	P14868	Aspartate--tRNA ligase, cytoplasmic	203	RLQSGIcHLFRET
cp2acid	C	5	100	P14923	Junction plakoglobin	372	PRLVQNcLWTLRN
cp2acid	C	5	100	P15121	Aldo-keto reductase family 1 member B1	200	EKLIQYcQSKGIV
cp2acid	C	7	100	P15121	Aldo-keto reductase family 1 member B1	304	VCALLScTSHKDY
cp2acid	C	10	100	P15121	Aldo-keto reductase family 1 member B1	187	AVNQIEcHPYLTQ
cp2acid	C	3	100	P15121	Aldo-keto reductase family 1 member B1	81	IVSKLWcTYHEKG
cp2acid	C	2	100	P15121	Aldo-keto reductase family 1 member B1	299	NRNWRVcALLSCT
cp2acid	C	5	100	P15170	Eukaryotic peptide chain release factor GTP-binding subunit ERF3A	453	VKQDQVcIARLRT
cp2acid	C	4	100	P15170	Eukaryotic peptide chain release factor GTP-binding subunit ERF3A	237	NERYEEcKEKLVP
cp2acid	C	7	100	P15374	Ubiquitin carboxyl-terminal hydrolase isozyme L3	95	QTISNAcGTIGLI
cp2acid	C	4	100	P15531	Nucleoside diphosphate kinase A	109	TIRGDFcIQVGRN
cp2acid	C	9	100	P15880	40S ribosomal protein S2	182	KPHTVPcKVTGRC
cp2acid	C	2	100	P15880	40S ribosomal protein S2	229	YTSARGcTATLGN
cp2acid	C	2	100	P15927	Replication protein A 32 kDa subunit	219	LNLIKAcPRPEGL
cp2acid	C	2	100	P16152	Carbonyl reductase [NADPH] 1	150	VRALKScSPELQQ
cp2acid	C	3	100	P16152	Carbonyl reductase [NADPH] 1	122	FGTRDVcTELLPL
cp2acid	C	11	100	P16435	NADPH--cytochrome P450 reductase	566	TLLYYGcRRSDED
cp2acid	C	10	100	P16455	Methylated-DNA--protein-cysteine methyltransferase	145	VPILIPcHRVVCS
cp2acid	C	4	100	P16615	Sarcoplasmic/endoplasmic reticulum calcium ATPase 2	471	IERANAcNSVIKQ
cp2acid	C	5	100	P17066	Heat shock 70 kDa protein 6	269	RRLRTAcERAKRT
cp2acid	C	7	100	P17066	Heat shock 70 kDa protein 6	308	ARFEELcSDLFRS
cp2acid	C	7	100	P17540	Creatine kinase S-type, mitochondrial	317	LGYILTcPSNLGT
cp2acid	C	2	100	P17812	CTP synthase 1	30	GTILKScGLHVTS
cp2acid	C	7	100	P17844	Probable ATP-dependent RNA helicase DDX5	234	LIDFLEcGKTNLR
cp2acid	C	2	100	P17844	Probable ATP-dependent RNA helicase DDX5	354	VETKRRcDELTRK
cp2acid	C	3	100	P17844	Probable ATP-dependent RNA helicase DDX5	200	CRLKSTcIYGGAP
cp2acid	C	4	100	P17931	Galectin-3	173	NRRVIVcNTKLDN
cp2acid	C	2	100	P17980	26S proteasome regulatory subunit 6A	240	TLLARAcAAQTKA
cp2acid	C	3	100	P17987	T-complex protein 1 subunit alpha	236	VNAKIAcLDFSLQ
cp2acid	C	2	100	P17987	T-complex protein 1 subunit alpha	357	VVQERIcDDELIL
cp2acid	C	2	100	P17987	T-complex protein 1 subunit alpha	147	DELGRDcLINAAK
cp2acid	C	5	100	P18124	60S ribosomal protein L7	186	GKYGIIcMEDLIH
cp2acid	C	5	100	P18206	Vinculin	85	IKVENAcTKLVQA
cp2acid	C	5	100	P18206	Vinculin	1018	KRALIQcAKDIAK
cp2acid	C	7	100	P18206	Vinculin	1053	TNLLQVcERIPTI
cp2acid	C	2	100	P18206	Vinculin	1040	KEVAKQcTDKRIR
cp2acid	C	12	100	P18669	Phosphoglycerate mutase 1	153	EDQLPScESLKDT
cp2acid	C	6	100	P19338	Nucleolin	543	KEALNScNKREIE
cp2acid	C	5	100	P19784	Casein kinase II subunit alpha'	148	LKALDYcHSKGIM
cp2acid	C	5	100	P20073	Annexin A7	413	LKTILQcALNRPA
cp2acid	C	5	100	P20618	Proteasome subunit beta type-1	82	DKTVIGcSGFHGD
cp2acid	C	2	100	P21266	Glutathione S-transferase Mu 3	119	TQLIRLcYSSDHE
cp2acid	C	2	100	P21283	V-type proton ATPase subunit C 1	15	APGEKTcQQTWEK
cp2acid	C	6	100	P21291	Cysteine and glycine-rich protein 1	143	KSWHKAcFRCAKC
cp2acid	C	2	100	P21333	Filamin-A	53	NTFTRWcNEHLKC
cp2acid	C	8	100	P21796	Voltage-dependent anion-selective channel protein 1	232	QIDPDAcFSAKVN
cp2acid	C	8	100	P21980	Protein-glutamine gamma-glutamyltransferase 2	27	HHTADLcREKLVV
cp2acid	C	4	100	P21980	Protein-glutamine gamma-glutamyltransferase 2	554	YEKYRDcLTESNL
cp2acid	C	12	100	P21980	Protein-glutamine gamma-glutamyltransferase 2	524	GILGPEcGTKYLL
cp2acid	C	7	99.8	P21980	Protein-glutamine gamma-glutamyltransferase 2	371	SEGTYCcGPVPVR
cp2acid	C	5	100	P21980	Protein-glutamine gamma-glutamyltransferase 2	545	EKSVPLcILYEKY
cp2acid	C	4	100	P21980	Protein-glutamine gamma-glutamyltransferase 2	269	RWKNHGcQRVKYG
cp2acid	C	4	100	P21980	Protein-glutamine gamma-glutamyltransferase 2	510	VCRLLLcARTVSY
cp2acid	C	14	100	P22061	Protein-L-isoaspartate(D-aspartate) O-methyltransferase	95	SGILTAcFARMVG
cp2acid	C	5	100	P22234	Multifunctional protein ADE2	266	LKSESQcRVVVLM
cp2acid	C	5	100	P22314	Ubiquitin-like modifier-activating enzyme 1	632	EKSIPIcTLKNFP
cp2acid	C	8	100	P22314	Ubiquitin-like modifier-activating enzyme 1	234	NPGVVTcLDEARH
cp2acid	C	4	100	P22392	Nucleoside diphosphate kinase B	109	TIRGDFcIQVGRN
cp2acid	C	4	100	P22626	Heterogeneous nuclear ribonucleoproteins A2/B1	50	WGKLTDcVVMRDP
cp2acid	C	9	100	P22695	Cytochrome b-c1 complex subunit 2, mitochondrial	192	LANPLYcPDYRIG
cp2acid	C	9	100	P22695	Cytochrome b-c1 complex subunit 2, mitochondrial	125	MAYTVEcLRGDVD
cp2acid	C	12	100	P23284	Peptidyl-prolyl cis-trans isomerase B	202	DVIIADcGKIEVE
cp2acid	C	3	100	P23396	40S ribosomal protein S3	97	VATRGLcAIAQAE
cp2acid	C	2	100	P23396	40S ribosomal protein S3	134	ESGAKGcEVVVSG
cp2acid	C	2	100	P23396	40S ribosomal protein S3	119	LAVRRAcYGVLRF
cp2acid	C	2	100	P23434	Glycine cleavage system H protein, mitochondrial	138	GLVNKScYEDGWL
cp2acid	C	2	100	P23526	Adenosylhomocysteinase	228	GDVGKGcAQALRG
cp2acid	C	7	100	P23526	Adenosylhomocysteinase	195	FDNLYGcRESLID
cp2acid	C	15	100	P23528	Cofilin-1	147	EEVKDRcTLAEKL
cp2acid	C	7	100	P23528	Cofilin-1	139	HELQANcYEEVKD
cp2acid	C	5	100	P23528	Cofilin-1	39	KKAVLFcLSEDKK
cp2acid	C	7	100	P23528	Cofilin-1	80	MLPDKDcRYALYD
cp2acid	C	2	100	P24390	ER lumen protein-retaining receptor 1	29	IWKSRScAGISGK
cp2acid	C	4	100	P24534	Elongation factor 1-beta	161	MAKLEEcVRSIQA
cp2acid	C	8	100	P24941	Cyclin-dependent kinase 2	177	PEILLGcKYYSTA
cp2acid	C	6	100	P25398	40S ribosomal protein S12	69	KLVEALcAEHQIN
cp2acid	C	8	100	P25398	40S ribosomal protein S12	92	GEWVGLcKIDREG
cp2acid	C	11	100	P25398	40S ribosomal protein S12	56	CVLASNcDEPMYV
cp2acid	C	5	100	P25398	40S ribosomal protein S12	106	PRKVVGcSCVVVK
cp2acid	C	10	100	P25685	DnaJ homolog subfamily B member 1	179	EEIYSGcTKKMKI
cp2acid	C	3	100	P25786	Proteasome subunit alpha type-1	92	NFMRQEcLDSRFV
cp2acid	C	3	100	P25786	Proteasome subunit alpha type-1	85	ADARLLcNFMRQE
cp2acid	C	11	100	P25789	Proteasome subunit alpha type-4	107	YQEPIPcEQLVTA
cp2acid	C	3	100	P25789	Proteasome subunit alpha type-4	163	GGWKATcIGNNSA
cp2acid	C	8	100	P26196	Probable ATP-dependent RNA helicase DDX6	102	NEFEDYcLKRELL
cp2acid	C	5	100	P26196	Probable ATP-dependent RNA helicase DDX6	324	ERQKVHcLNTLFS
cp2acid	C	16	100	P26368	Splicing factor U2AF 65 kDa subunit	429	GVEVPGcGKIFVE
cp2acid	C	3	100	P26447	Protein S100-A4	3	MAcPLEKAL
cp2acid	C	10	100	P26583	High mobility group protein B2	106	SAFFLFcSEHRPK
cp2acid	C	12	99.8	P26599	Polypyrimidine tract-binding protein 1	250	QNIYNAcCTLRID
cp2acid	C	9	100	P26641	Elongation factor 1-gamma	210	LGEVKLcEKMAQF
cp2acid	C	13	100	P26641	Elongation factor 1-gamma	194	NRWFLTcINQPQF
cp2acid	C	3	100	P27348	14-3-3 protein theta	94	SELRSIcTTVLEL
cp2acid	C	7	100	P27348	14-3-3 protein theta	25	YDDMATcMKAVTE
cp2acid	C	7	100	P27348	14-3-3 protein theta	134	YLAEVAcGDDRKQ
cp2acid	C	4	100	P27635	60S ribosomal protein L10	105	INKMLScAGADRL
cp2acid	C	2	100	P27695	DNA-(apurinic or apyrimidinic site) endonuclease	65	PATLKIcSWNVDG
cp2acid	C	7	100	P27797	Calreticulin	105	HEQNIDcGGGYVK
cp2acid	C	10	100	P28482	Mitogen-activated protein kinase 1	65	FEHQTYcQRTLRE
cp2acid	C	13	100	P28482	Mitogen-activated protein kinase 1	161	LLLNTTcDLKICD
cp2acid	C	19	100	P29401	Transketolase	133	QGLGAAcGMAYTG
cp2acid	C	5	100	P29401	Transketolase	386	NRTVPFcSTFAAF
cp2acid	C	6	100	P30041	Peroxiredoxin-6	47	RDFTPVcTTELGR
cp2acid	C	7	100	P30041	Peroxiredoxin-6	91	DINAYNcEEPTEK
cp2acid	C	4	100	P30043	Flavin reductase (NADPH)	109	VDKVVAcTSAFLL
cp2acid	C	12	100	P30048	Thioredoxin-dependent peroxide reductase, mitochondrial	229	ETHGEVcPANWTP
cp2acid	C	14	100	P30086	Phosphatidylethanolamine-binding protein 1	133	QDRPLKcDEPILS
cp2acid	C	7	100	P30086	Phosphatidylethanolamine-binding protein 1	168	APVAGTcYQAEWD
cp2acid	C	10	100	P30101	Protein disulfide-isomerase A3	92	TANTNTcNKYGVS
cp2acid	C	12	100	P30153	Serine/threonine-protein phosphatase 2A 65 kDa regulatory subunit A alpha isoform	317	ENLSADcRENVIM
cp2acid	C	2	100	P30153	Serine/threonine-protein phosphatase 2A 65 kDa regulatory subunit A alpha isoform	294	QNLMKDcEAEVRA
cp2acid	C	4	100	P30153	Serine/threonine-protein phosphatase 2A 65 kDa regulatory subunit A alpha isoform	148	TSRTSAcGLFSVC
cp2acid	C	18	100	P30519	Heme oxygenase 2	282	ALEGSScPFRTAM
cp2acid	C	10	99.8	P30626	Sorcin	163	DDYIACcVKLRAL
cp2acid	C	19	100	P30626	Sorcin	75	PFNLETcRLMVSM
cp2acid	C	3	100	P30838	Aldehyde dehydrogenase, dimeric NADP-preferring	428	FSHRRScLVRPLM
cp2acid	C	2	100	P30838	Aldehyde dehydrogenase, dimeric NADP-preferring	223	CYVDKNcDLDVAC
cp2acid	C	8	100	P30838	Aldehyde dehydrogenase, dimeric NADP-preferring	244	MNSGQTcVAPDYI
cp2acid	C	3	100	P30838	Aldehyde dehydrogenase, dimeric NADP-preferring	217	LGGKSPcYVDKNC
cp2acid	C	8	100	P30838	Aldehyde dehydrogenase, dimeric NADP-preferring	229	CDLDVAcRRIAWG
cp2acid	C	3	100	P31153	S-adenosylmethionine synthase isoform type-2	56	PDAKVAcETVAKT
cp2acid	C	5	100	P31689	DnaJ homolog subfamily A member 1	149	KKGAVEcCPNCRG
cp2acid	C	7	100	P31751	RAC-beta serine/threonine-protein kinase	297	ITDFGLcKEGISD
cp2acid	C	2	100	P31930	Cytochrome b-c1 complex subunit 1, mitochondrial	380	GQWMRLcTSATES
cp2acid	C	8	100	P31939	Bifunctional purine biosynthesis protein ATIC	434	TQSNSVcYAKNGQ
cp2acid	C	4	100	P31939	Bifunctional purine biosynthesis protein ATIC	101	LIRVVAcNLYPFV
cp2acid	C	5	100	P31943	Heterogeneous nuclear ribonucleoprotein H	34	QRFFSDcKIQNGA
cp2acid	C	2	100	P31946	14-3-3 protein beta/alpha	191	NSPEKAcSLAKTA
cp2acid	C	11	100	P31947	14-3-3 protein sigma	38	KGEELScEERNLL
cp2acid	C	6	100	P31948	Stress-induced-phosphoprotein 1	62	KAYEDGcKTVDLK
cp2acid	C	8	100	P31948	Stress-induced-phosphoprotein 1	461	LDLDSScKEAADG
cp2acid	C	3	100	P31948	Stress-induced-phosphoprotein 1	403	YSNRAAcYTKLLE
cp2acid	C	10	100	P31949	Protein S100-A11	13	PTETERcIESLIA
cp2acid	C	7	100	P32969	60S ribosomal protein L9	134	MRPGVAcSVSQAQ
cp2acid	C	3	100	P32969	60S ribosomal protein L9	74	ATVRTIcSHVQNM
cp2acid	C	2	100	P33240	Cleavage stimulation factor subunit 2	150	MKQMKLcVQNSPQ
cp2acid	C	6	100	P33316	Deoxyuridine 5'-triphosphate nucleotidohydrolase, mitochondrial	222	RIAQLIcERIFYP
cp2acid	C	2	100	P33947	ER lumen protein-retaining receptor 2	29	IWKTRScAGISGK
cp2acid	C	3	100	P34896	Serine hydroxymethyltransferase, cytosolic	389	ACNKNTcPGDRSA
cp2acid	C	8	100	P34896	Serine hydroxymethyltransferase, cytosolic	204	IIAGTScYSRNLE
cp2acid	C	12	100	P34932	Heat shock 70 kDa protein 4	146	CVVSVPcFYTDAE
cp2acid	C	2	100	P34932	Heat shock 70 kDa protein 4	376	EAVTRGcALQCAI
cp2acid	C	5	100	P34932	Heat shock 70 kDa protein 4	38	DRCTPAcISFGPK
cp2acid	C	2	100	P35080	Profilin-2	71	TLGAKKcSVIRDS
cp2acid	C	5	100	P35221	Catenin alpha-1	337	ERIVAEcNAVRQA
cp2acid	C	2	100	P35237	Serpin B6	100	LFGEKScDFLSSF
cp2acid	C	7	100	P35237	Serpin B6	370	TNGILFcGRFSSP
cp2acid	C	15	100	P35244	Replication protein A 14 kDa subunit	26	FIDKPVcFVGRLE
cp2acid	C	9	100	P35270	Sepiapterin reductase	159	VNISSLcALQPFK
cp2acid	C	3	100	P35270	Sepiapterin reductase	10	GLGRAVcLLTGAS
cp2acid	C	6	100	P35270	Sepiapterin reductase	171	KGWALYcAGKAAR
cp2acid	C	5	100	P35606	Coatomer subunit beta'	56	VKTFEVcDLPVRA
cp2acid	C	3	100	P35637	RNA-binding protein FUS	444	FSWRNEcNQCKAP
cp2acid	C	9	100	P35754	Glutaredoxin-1	23	VFIKPTcPYCRRA
cp2acid	C	8	100	P35754	Glutaredoxin-1	8	AQEFVNcKIQPGK
cp2acid	C	4	100	P35998	26S proteasome regulatory subunit 7	236	ANRTDAcFIRVIG
cp2acid	C	4	100	P36404	ADP-ribosylation factor-like protein 2	102	RQRMQDcQRELQS
cp2acid	C	2	100	P36578	60S ribosomal protein L4	250	GHVGRFcIWTESA
cp2acid	C	10	100	P36578	60S ribosomal protein L4	96	GAFGNMcRGGRMF
cp2acid	C	3	100	P36578	60S ribosomal protein L4	3	MAcARPLIS
cp2acid	C	3	100	P36578	60S ribosomal protein L4	208	IQRRGPcIIYNED
cp2acid	C	5	100	P36873	Serine/threonine-protein phosphatase PP1-gamma catalytic subunit	127	LRGNHEcASINRI
cp2acid	C	14	100	P37108	Signal recognition particle 14 kDa protein	56	EPADNKcLLRATD
cp2acid	C	7	100	P37268	Squalene synthase	374	TQNLPNcQLISRS
cp2acid	C	4	100	P37802	Transgelin-2	124	EGKNMAcVQRTLM
cp2acid	C	5	100	P37837	Transaldolase	250	IKALAGcDFLTIS
cp2acid	C	9	100	P38606	V-type proton ATPase catalytic subunit A	138	KWDFTPcKNLRVG
cp2acid	C	6	100	P38646	Stress-70 protein, mitochondrial	366	RRTIAPcQKAMQD
cp2acid	C	2	100	P39023	60S ribosomal protein L3	157	SSMKKYcQVIRVI
cp2acid	C	11	100	P39023	60S ribosomal protein L3	114	EHISDEcKRRFYK
cp2acid	C	4	100	P39023	60S ribosomal protein L3	253	GLRKVAcIGAWHP
cp2acid	C	12	100	P39687	Acidic leucine-rich nuclear phosphoprotein 32 family member A	87	EVLAEKcPNLTHL
cp2acid	C	7	100	P39687	Acidic leucine-rich nuclear phosphoprotein 32 family member A	123	SLDLFNcEVTNLN
cp2acid	C	3	100	P40227	T-complex protein 1 subunit zeta	282	ELKRKVcGDSDKG
cp2acid	C	3	100	P40261	Nicotinamide N-methyltransferase	50	NLFKIFcLDGVKG
cp2acid	C	3	100	P40925	Malate dehydrogenase, cytoplasmic	251	SAAKAIcDHVRDI
cp2acid	C	5	100	P40925	Malate dehydrogenase, cytoplasmic	154	PKENFScLTRLDH
cp2acid	C	12	100	P40925	Malate dehydrogenase, cytoplasmic	137	NPANTNcLTASKS
cp2acid	C	11	100	P40926	Malate dehydrogenase, mitochondrial	89	PEQLPDcLKGCDV
cp2acid	C	6	100	P40926	Malate dehydrogenase, mitochondrial	275	KEGVVEcSFVKSQ
cp2acid	C	2	100	P40926	Malate dehydrogenase, mitochondrial	93	PDCLKGcDVVVIP
cp2acid	C	9	100	P40926	Malate dehydrogenase, mitochondrial	212	IPLISQcTPKVDF
cp2acid	C	6	100	P40926	Malate dehydrogenase, mitochondrial	285	KSQETEcTYFSTP
cp2acid	C	8	100	P41091	Eukaryotic translation initiation factor 2 subunit 3	434	VLTNPVcTEVGEK
cp2acid	C	6	100	P41091	Eukaryotic translation initiation factor 2 subunit 3	348	KIDPTLcRADRMV
cp2acid	C	11	100	P41091	Eukaryotic translation initiation factor 2 subunit 3	101	SCPRPEcYRSCGS
cp2acid	C	2	100	P41091	Eukaryotic translation initiation factor 2 subunit 3	105	PECYRScGSSTPD
cp2acid	C	7	100	P41240	Tyrosine-protein kinase CSK	290	SVLGGDcLLKFSL
cp2acid	C	7	100	P42330	Aldo-keto reductase family 1 member C3	7	MDSKHQcVKLNDG
cp2acid	C	16	100	P42330	Aldo-keto reductase family 1 member C3	242	LEDPVLcALAKKH
cp2acid	C	5	100	P42330	Aldo-keto reductase family 1 member C3	188	LKYKPVcNQVECH
cp2acid	C	5	100	P42330	Aldo-keto reductase family 1 member C3	206	SKLLDFcKSKDIV
cp2acid	C	13	100	P42695	Condensin-2 complex subunit D3	572	VSILKHcDVSGMK
cp2acid	C	6	100	P42704	Leucine-rich PPR motif-containing protein, mitochondrial	113	KVFNDTcRSGGLG
cp2acid	C	2	100	P42704	Leucine-rich PPR motif-containing protein, mitochondrial	130	LLLLRScGSLLPE
cp2acid	C	4	100	P42704	Leucine-rich PPR motif-containing protein, mitochondrial	952	TQKLFEcDRDQMY
cp2acid	C	6	100	P42704	Leucine-rich PPR motif-containing protein, mitochondrial	1043	KDILIAcRLNQKK
cp2acid	C	6	100	P42704	Leucine-rich PPR motif-containing protein, mitochondrial	208	RLIASYcNVGDIE
cp2acid	C	5	100	P42704	Leucine-rich PPR motif-containing protein, mitochondrial	394	EKLTDYcKKLKEV
cp2acid	C	2	100	P42704	Leucine-rich PPR motif-containing protein, mitochondrial	571	YKDGRYcQEPRGP
cp2acid	C	7	100	P43490	Nicotinamide phosphoribosyltransferase	39	VYSYFEcREKKTE
cp2acid	C	5	100	P43490	Nicotinamide phosphoribosyltransferase	397	TRDLLNcSFKCSY
cp2acid	C	10	100	P43686	26S proteasome regulatory subunit 6B	210	MYGPPGcGKTMLA
cp2acid	C	8	100	P43897	Elongation factor Ts, mitochondrial	64	GYSFVNcKKALET
cp2acid	C	5	100	P45954	Short/branched chain specific acyl-CoA dehydrogenase, mitochondrial	261	LRASSTcPLTFEN
cp2acid	C	2	100	P45974	Ubiquitin carboxyl-terminal hydrolase 5	838	YNDQKVcASEKPP
cp2acid	C	5	100	P46776	60S ribosomal protein L27a	70	KRNQSFcPTVNLD
cp2acid	C	11	100	P46777	60S ribosomal protein L5	100	NYAAAYcTGLLLA
cp2acid	C	8	100	P46777	60S ribosomal protein L5	76	EGDMIVcAAYAHE
cp2acid	C	4	100	P46777	60S ribosomal protein L5	62	TNRDIIcQIAYAR
cp2acid	C	2	100	P46779	60S ribosomal protein L28	13	WMVVRNcSSFLIK
cp2acid	C	4	100	P46781	40S ribosomal protein S9	9	VARSWVcRKTYVT
cp2acid	C	5	100	P46782	40S ribosomal protein S5	172	IKTIAEcLADELI
cp2acid	C	10	100	P46782	40S ribosomal protein S5	155	QAIWLLcTGAREA
cp2acid	C	3	100	P46782	40S ribosomal protein S5	66	RFRKAQcPIVERL
cp2acid	C	2	100	P46940	Ras GTPase-activating-like protein IQGAP1	1534	KSYIKTcLDNLAS
cp2acid	C	5	100	P46977	Dolichyl-diphosphooligosaccharide--protein glycosyltransferase subunit STT3A	193	VKTGSIcWAAKCA
cp2acid	C	8	100	P47755	F-actin-capping protein subunit alpha-2	111	ATDPRPcEVENAV
cp2acid	C	2	100	P47756	F-actin-capping protein subunit beta	147	SKKIKGcWDSIHV
cp2acid	C	5	100	P48047	ATP synthase subunit O, mitochondrial	141	HRGEVPcTVTSAS
cp2acid	C	9	100	P48147	Prolyl endopeptidase	57	VPFLEQcPIRGLY
cp2acid	C	6	100	P48444	Coatomer subunit delta	94	RVIPEYcRALEEN
cp2acid	C	4	100	P48444	Coatomer subunit delta	479	VSKKNYcNIQVTK
cp2acid	C	9	100	P48444	Coatomer subunit delta	9	LLAAAVcTKAGKA
cp2acid	C	8	100	P48506	Glutamate--cysteine ligase catalytic subunit	295	YVSDIDcRWGVIS
cp2acid	C	9	100	P48637	Glutathione synthetase	409	PEPFENcLLRPGS
cp2acid	C	7	100	P48643	T-complex protein 1 subunit epsilon	407	SLHDALcVIRNLI
cp2acid	C	7	100	P48643	T-complex protein 1 subunit epsilon	377	MLVIEQcKNSRAV
cp2acid	C	5	100	P48643	T-complex protein 1 subunit epsilon	181	SKVVNScHRQMAE
cp2acid	C	6	100	P48643	T-complex protein 1 subunit epsilon	253	KIAILTcPFEPPK
cp2acid	C	9	100	P48735	Isocitrate dehydrogenase [NADP], mitochondrial	308	GGFVWAcKNYDGD
cp2acid	C	8	100	P48739	Phosphatidylinositol transfer protein beta isoform	187	LANSPDcPQMCAY
cp2acid	C	8	100	P48739	Phosphatidylinositol transfer protein beta isoform	94	WNAYPYcRTIVTN
cp2acid	C	7	100	P49207	60S ribosomal protein L34	83	AYGGSMcAKCVRD
cp2acid	C	3	100	P49207	60S ribosomal protein L34	46	KAPKSAcGVCPGR
cp2acid	C	6	100	P49207	60S ribosomal protein L34	49	KSACGVcPGRLRG
cp2acid	C	5	100	P49354	Protein farnesyltransferase/geranylgeranyltransferase type-1 subunit alpha	341	NKALELcEILAKE
cp2acid	C	2	100	P49368	T-complex protein 1 subunit gamma	40	ADIIRTcLGPKSM
cp2acid	C	10	100	P49368	T-complex protein 1 subunit gamma	213	GIIEDScVLRGVM
cp2acid	C	6	100	P49368	T-complex protein 1 subunit gamma	455	RTLIQNcGASTIR
cp2acid	C	8	100	P49406	39S ribosomal protein L19, mitochondrial	137	SQFLGIcIQRSGR
cp2acid	C	3	100	P49419	Alpha-aminoadipic semialdehyde dehydrogenase	522	YMRRSTcTINYSK
cp2acid	C	8	100	P49419	Alpha-aminoadipic semialdehyde dehydrogenase	70	EVITTYcPANNEP
cp2acid	C	7	100	P49458	Signal recognition particle 9 kDa protein	48	VTDDLVcLVYKTD
cp2acid	C	7	100	P49588	Alanine--tRNA ligase, cytoplasmic	671	AVYTQDcPLAAAK
cp2acid	C	8	100	P49591	Serine--tRNA ligase, cytoplasmic	398	LVSCSNcTDYQAR
cp2acid	C	7	100	P49591	Serine--tRNA ligase, cytoplasmic	300	YAGLSTcFRQEVG
cp2acid	C	4	100	P49720	Proteasome subunit beta type-3	19	AMKGKNcVAIAAD
cp2acid	C	2	100	P49721	Proteasome subunit beta type-2	163	VELLRKcLEELQK
cp2acid	C	5	100	P49721	Proteasome subunit beta type-2	91	RRNLADcLRSRTP
cp2acid	C	5	100	P49736	DNA replication licensing factor MCM2	223	ERISDMcKENRES
cp2acid	C	8	100	P49748	Very long-chain specific acyl-CoA dehydrogenase, mitochondrial	237	SAVPSPcGKYYTL
cp2acid	C	2	100	P49773	Adenosine 5'-monophosphoramidase HINT1	84	MIVGKKcAADLGL
cp2acid	C	2	100	P49840	Glycogen synthase kinase-3 alpha	262	TAVLKLcDFGSAK
cp2acid	C	2	100	P49914	5-formyltetrahydrofolate cyclo-ligase	78	FQRGKIcFIPRYR
cp2acid	C	2	100	P49915	GMP synthase [glutamine-hydrolyzing]	554	RLIPRMcHNVNRV
cp2acid	C	6	100	P50238	Cysteine-rich protein 1	28	KDWHRPcLKCEKC
cp2acid	C	8	100	P50395	Rab GDP dissociation inhibitor beta	317	TNDANScQIIIPQ
cp2acid	C	12	100	P50395	Rab GDP dissociation inhibitor beta	414	THFETTcDDIKNI
cp2acid	C	9	100	P50395	Rab GDP dissociation inhibitor beta	202	DYLDQPcYETINR
cp2acid	C	2	100	P50453	Serpin B9	98	LFGEKTcQFLSTF
cp2acid	C	7	100	P50453	Serpin B9	370	ANSILFcGRFSSP
cp2acid	C	3	100	P50453	Serpin B9	108	STFKEScLQFYHA
cp2acid	C	7	100	P50552	Vasodilator-stimulated phosphoprotein	7	MSETVIcSSRATV
cp2acid	C	2	100	P50583	Bis(5'-nucleosyl)-tetraphosphatase [asymmetrical]	6	MALRAcGLIIFR
cp2acid	C	7	100	P50914	60S ribosomal protein L14	42	ALVDGPcTQVRRQ
cp2acid	C	5	100	P50990	T-complex protein 1 subunit theta	36	YRNIQAcKELAQT
cp2acid	C	9	100	P50990	T-complex protein 1 subunit theta	430	TSYGETcPGLEQY
cp2acid	C	6	100	P50990	T-complex protein 1 subunit theta	244	KIAVYScPFDGMI
cp2acid	C	10	99.7	P50990	T-complex protein 1 subunit theta	148	ILPNLVcCSAKNL
cp2acid	C	9	100	P50991	T-complex protein 1 subunit delta	450	SGMESYcVRAFAD
cp2acid	C	4	100	P50991	T-complex protein 1 subunit delta	379	LLKITGcASPGKT
cp2acid	C	7	100	P50991	T-complex protein 1 subunit delta	252	IGLIQFcLSAPKT
cp2acid	C	4	100	P50991	T-complex protein 1 subunit delta	295	QIKKTGcNVLLIQ
cp2acid	C	6	100	P50995	Annexin A11	384	KFNAVLcSRSRAH
cp2acid	C	4	100	P51003	Poly(A) polymerase alpha	36	APKETDcVLTQKL
cp2acid	C	5	100	P51149	Ras-related protein Rab-7a	143	KRAQAWcYSKNNI
cp2acid	C	5	100	P51452	Dual specificity protein phosphatase 3	124	GRVLVHcREGYSR
cp2acid	C	4	100	P51610	Host cell factor 1	326	RARAGHcAVAINT
cp2acid	C	2	100	P51610	Host cell factor 1	1886	ISAFKTcLPGFPG
cp2acid	C	12	100	P51648	Aldehyde dehydrogenase family 3 member A2	425	FSHQRPcLLKSLK
cp2acid	C	2	100	P51665	26S proteasome non-ATPase regulatory subunit 7	116	ELMKRYcPNSVLV
cp2acid	C	13	100	P51668	Ubiquitin-conjugating enzyme E2 D1	85	NSNGSIcLDILRS
cp2acid	C	10	100	P51812	Ribosomal protein S6 kinase alpha-3	579	GLLMTPcYTANFV
cp2acid	C	2	100	P51812	Ribosomal protein S6 kinase alpha-3	560	PESIRIcDFGFAK
cp2acid	C	7	100	P52209	6-phosphogluconate dehydrogenase, decarboxylating	170	VGTGEPcCDWVGD
cp2acid	C	6	100	P52209	6-phosphogluconate dehydrogenase, decarboxylating	402	KSAVENcQDSWRR
cp2acid	C	2	100	P52272	Heterogeneous nuclear ribonucleoprotein M	114	EGKSRGcAVVEFK
cp2acid	C	2	100	P52272	Heterogeneous nuclear ribonucleoprotein M	653	GVARKAcQIFVRN
cp2acid	C	6	100	P52594	Arf-GAP domain and FG repeat-containing protein 1	89	KHGNEVcKQIWLG
cp2acid	C	4	100	P52758	2-iminobutanoate/2-iminopropanoate deaminase	71	ILKAAGcDFTNVV
cp2acid	C	3	100	P52788	Spermine synthase	337	QLGRLYcPVEFSK
cp2acid	C	6	100	P52895	Aldo-keto reductase family 1 member C2	206	RKLLDFcKSKDIV
cp2acid	C	19	100	P52895	Aldo-keto reductase family 1 member C2	242	LEDPVLcALAKKH
cp2acid	C	5	100	P52895	Aldo-keto reductase family 1 member C2	188	LKYKPVcNQVECH
cp2acid	C	7	100	P52895	Aldo-keto reductase family 1 member C2	7	MDSKYQcVKLNDG
cp2acid	C	11	100	P52907	F-actin-capping protein subunit alpha-1	157	QQTIIAcIESHQF
cp2acid	C	3	100	P52907	F-actin-capping protein subunit alpha-1	124	KSWREScDSALRA
cp2acid	C	4	100	P53004	Biliverdin reductase A	204	YMKMTVcLETEKK
cp2acid	C	4	100	P53004	Biliverdin reductase A	281	KKRILHcLGLAEE
cp2acid	C	4	100	P53041	Serine/threonine-protein phosphatase 5	139	KMKYQEcNKIVKQ
cp2acid	C	3	100	P53041	Serine/threonine-protein phosphatase 5	77	AYLRTEcYGYALG
cp2acid	C	3	100	P53396	ATP-citrate synthase	20	LLYKFIcTTSAIQ
cp2acid	C	3	100	P53597	Succinate--CoA ligase [ADP/GDP-forming] subunit alpha, mitochondrial	60	KNTKIIcQGFTGK
cp2acid	C	6	100	P53602	Diphosphomevalonate decarboxylase	160	RGSGSAcRSLYGG
cp2acid	C	5	100	P53618	Coatomer subunit beta	390	VRTLHScSVRFPD
cp2acid	C	6	100	P53816	Phospholipase A and acyltransferase 3	113	KLTSENcEHFVNE
cp2acid	C	7	100	P53990	IST1 homolog	125	IVADQLcAKYSKE
cp2acid	C	3	100	P54136	Arginine--tRNA ligase, cytoplasmic	312	KAWKLIcDVSRQE
cp2acid	C	6	100	P54577	Tyrosine--tRNA ligase, cytoplasmic	519	KLGSIScKSLKGG
cp2acid	C	6	100	P54577	Tyrosine--tRNA ligase, cytoplasmic	424	RLVVVLcNLKPQK
cp2acid	C	5	100	P54577	Tyrosine--tRNA ligase, cytoplasmic	501	FKISEEcIAQWKQ
cp2acid	C	5	100	P54920	Alpha-soluble NSF attachment protein	42	SKIEEAcEIYARA
cp2acid	C	10	100	P54920	Alpha-soluble NSF attachment protein	103	PQEAINcLMRAIE
cp2acid	C	8	100	P55010	Eukaryotic translation initiation factor 5	122	QTIGNScKACGYR
cp2acid	C	6	100	P55011	Solute carrier family 12 member 2	630	KIFQALcKDNIYP
cp2acid	C	6	100	P55036	26S proteasome non-ATPase regulatory subunit 4	87	KGKITFcTGIRVA
cp2acid	C	5	100	P55060	Exportin-2	939	HKLSTAcPGRVPS
cp2acid	C	3	100	P55060	Exportin-2	842	NVEKKIcAVGITK
cp2acid	C	6	100	P55060	Exportin-2	195	KATIELcSTHAND
cp2acid	C	4	100	P55060	Exportin-2	272	LLKSQIcDNAALY
cp2acid	C	10	100	P55060	Exportin-2	85	DEPNKIcEADRVA
cp2acid	C	3	100	P55060	Exportin-2	387	TRRRAAcDLVRGL
cp2acid	C	10	100	P55072	Transitional endoplasmic reticulum ATPase	105	VISIQPcPDVKYG
cp2acid	C	10	100	P55072	Transitional endoplasmic reticulum ATPase	522	FYGPPGcGKTLLA
cp2acid	C	6	100	P55072	Transitional endoplasmic reticulum ATPase	535	KAIANEcQANFIS
cp2acid	C	19	100	P55084	Trifunctional enzyme subunit beta, mitochondrial	435	PFGATGcRLVMAA
cp2acid	C	7	100	P55212	Caspase-6	163	IFIIQAcRGNQHD
cp2acid	C	3	100	P55263	Adenosine kinase	353	IIRRTGcTFPEKP
cp2acid	C	6	100	P55735	Protein SEC13 homolog	245	RVFIWTcDDASSN
cp2acid	C	4	100	P55735	Protein SEC13 homolog	31	GTRLATcSSDRSV
cp2acid	C	6	100	P55735	Protein SEC13 homolog	187	RFASGGcDNLIKL
cp2acid	C	8	100	P55884	Eukaryotic translation initiation factor 3 subunit B	302	WLEEAEcRDQYSV
cp2acid	C	6	100	P55884	Eukaryotic translation initiation factor 3 subunit B	527	KNGDYLcVKVDRT
cp2acid	C	4	100	P55884	Eukaryotic translation initiation factor 3 subunit B	420	KKRGFHcESSAHW
cp2acid	C	7	100	P56134	ATP synthase subunit f, mitochondrial	7	MASVGEcPAPVPV
cp2acid	C	7	100	P56537	Eukaryotic translation initiation factor 6	11	ASFENNcEIGCFA
cp2acid	C	11	100	P56945	Breast cancer anti-estrogen resistance protein 1	820	HYSNLLcDLLRGI
cp2acid	C	2	100	P58546	Myotrophin	2	McDKEFMW
cp2acid	C	2	100	P60059	Protein transport protein Sec61 subunit gamma	25	IRLVKRcTKPDRK
cp2acid	C	8	100	P60174	Triosephosphate isomerase	67	AVAAQNcYKVTNG
cp2acid	C	9	100	P60174	Triosephosphate isomerase	42	ADTEVVcAPPTAY
cp2acid	C	2	100	P60174	Triosephosphate isomerase	87	PGMIKDcGATWVV
cp2acid	C	14	100	P60174	Triosephosphate isomerase	127	GLGVIAcIGEKLD
cp2acid	C	12	100	P60174	Triosephosphate isomerase	218	SVTGATcKELASQ
cp2acid	C	5	100	P60468	Protein transport protein Sec61 subunit beta	39	QRKNAScGTRSAG
cp2acid	C	6	100	P60660	Myosin light polypeptide 6	32	KILYSQcGDVMRA
cp2acid	C	4	100	P60866	40S ribosomal protein S20	70	TTRKTPcGEGSKT
cp2acid	C	2	100	P60866	40S ribosomal protein S20	36	KSLEKVcADLIRG
cp2acid	C	8	100	P60900	Proteasome subunit alpha type-6	161	DPAGYYcGFKATA
cp2acid	C	4	100	P60900	Proteasome subunit alpha type-6	47	AVRGKDcAVIVTQ
cp2acid	C	5	100	P60903	Protein S100-A10	62	MKDLDQcRDGKVG
cp2acid	C	2	100	P60953	Cell division control protein 42 homolog	18	GAVGKTcLLISYT
cp2acid	C	4	100	P60953	Cell division control protein 42 homolog	157	AVKYVEcSALTQK
cp2acid	C	9	100	P60953	Cell division control protein 42 homolog	105	PEITHHcPKTPFL
cp2acid	C	2	100	P60981	Destrin	23	DMKVRKcSTPEEI
cp2acid	C	11	100	P60981	Destrin	80	MLPEKDcRYALYD
cp2acid	C	5	100	P60981	Destrin	39	KKAVIFcLSADKK
cp2acid	C	12	100	P60981	Destrin	12	QVADEVcRIFYDM
cp2acid	C	2	100	P61019	Ras-related protein Rab-2A	21	TGVGKScLLLQFT
cp2acid	C	7	100	P61026	Ras-related protein Rab-10	124	MLLGNKcDMDDKR
cp2acid	C	2	100	P61026	Ras-related protein Rab-10	24	SGVGKTcVLFRFS
cp2acid	C	4	100	P61081	NEDD8-conjugating enzyme Ubc12	65	NFKLVIcPDEGFY
cp2acid	C	6	100	P61086	Ubiquitin-conjugating enzyme E2 K	170	KKIENLcAMGFDR
cp2acid	C	2	100	P61088	Ubiquitin-conjugating enzyme E2 N	87	DKLGRIcLDILKD
cp2acid	C	2	100	P61106	Ras-related protein Rab-14	26	MGVGKScLLHQFT
cp2acid	C	5	100	P61158	Actin-related protein 3	235	ERYSYVcPDLVKE
cp2acid	C	2	100	P61160	Actin-related protein 2	221	MIKEKLcYVGYNI
cp2acid	C	2	100	P61163	Alpha-centractin	222	AIKERAcYLSINP
cp2acid	C	2	100	P61163	Alpha-centractin	34	DQIPKYcFPNYVG
cp2acid	C	5	100	P61224	Ras-related protein Rap-1b	141	ARQWNNcAFLESS
cp2acid	C	8	100	P61225	Ras-related protein Rap-2b	140	LAEEWScPFMETS
cp2acid	C	4	100	P61247	40S ribosomal protein S3a	111	LTRDKMcSMVKKW
cp2acid	C	3	100	P61247	40S ribosomal protein S3a	139	YLLRLFcVGFTKK
cp2acid	C	2	100	P61247	40S ribosomal protein S3a	201	KDIEKAcQSIYPL
cp2acid	C	2	100	P61247	40S ribosomal protein S3a	96	DVQGKNcLTNFHG
cp2acid	C	6	100	P61289	Proteasome activator complex subunit 3	133	RLLIEKcNTVKMW
cp2acid	C	5	100	P61289	Proteasome activator complex subunit 3	92	KRRLDEcEEAFQG
cp2acid	C	2	100	P61313	60S ribosomal protein L15	110	ERAGRHcGALRVL
cp2acid	C	3	100	P61313	60S ribosomal protein L15	27	FLLRVRcWQYRQL
cp2acid	C	6	100	P61513	60S ribosomal protein L37a	42	KYTCSFcGKTKMK
cp2acid	C	10	100	P61513	60S ribosomal protein L37a	60	IWHCGScMKTVAG
cp2acid	C	11	100	P61586	Transforming protein RhoA	16	IVGDGAcGKTCLL
cp2acid	C	9	100	P61586	Transforming protein RhoA	159	AFGYMEcSAKTKD
cp2acid	C	3	100	P61586	Transforming protein RhoA	107	PEVKHFcPNVPII
cp2acid	C	4	100	P61599	N-alpha-acetyltransferase 20	9	TLRAFTcDDLFRF
cp2acid	C	7	100	P61927	60S ribosomal protein L37	19	NKTHTLcRRCGSK
cp2acid	C	17	100	P61970	Nuclear transport factor 2	80	QPTPDScIISMVV
cp2acid	C	8	100	P61970	Nuclear transport factor 2	114	INDAWVcTNDMFR
cp2acid	C	6	100	P61978	Heterogeneous nuclear ribonucleoprotein K	145	KGSDFDcELRLLI
cp2acid	C	4	100	P61978	Heterogeneous nuclear ribonucleoprotein K	205	PDRVVEcIKIILD
cp2acid	C	5	99.8	P61978	Heterogeneous nuclear ribonucleoprotein K	184	IKLFQEcCPHSTD
cp2acid	C	2	100	P61981	14-3-3 protein gamma	112	NYLIKNcSETQYE
cp2acid	C	2	100	P62070	Ras-related protein R-Ras2	55	DSYTKQcVIDDRA
cp2acid	C	10	100	P62191	26S proteasome regulatory subunit 4	58	VTPHTQcRLKLLK
cp2acid	C	3	100	P62191	26S proteasome regulatory subunit 4	399	ADIKAIcTEAGLM
cp2acid	C	3	100	P62195	26S proteasome regulatory subunit 8	363	AEVKGVcTEAGMY
cp2acid	C	8	100	P62195	26S proteasome regulatory subunit 8	209	VAHHTDcTFIRVS
cp2acid	C	12	99.7	P62241	40S ribosomal protein S8	71	FSWGSEcCTRKTR
cp2acid	C	12	100	P62241	40S ribosomal protein S8	182	ASRPGQcGRADGY
cp2acid	C	13	99.8	P62241	40S ribosomal protein S8	72	SWGSECcTRKTRI
cp2acid	C	2	100	P62241	40S ribosomal protein S8	100	KTLVKNcIVLIDS
cp2acid	C	4	100	P62244	40S ribosomal protein S15a	72	TGRLNKcGVISPR
cp2acid	C	7	100	P62244	40S ribosomal protein S15a	30	QVLIRPcSKVIVR
cp2acid	C	9	100	P62249	40S ribosomal protein S16	25	ATAVAHcKRGNGL
cp2acid	C	4	100	P62258	14-3-3 protein epsilon	98	ELKLICcDILDVL
cp2acid	C	6	100	P62273	40S ribosomal protein S29	39	KYGLNMcRQCFRQ
cp2acid	C	9	100	P62280	40S ribosomal protein S11	116	SVHLSPcFRDVQI
cp2acid	C	13	100	P62280	40S ribosomal protein S11	131	IVTVGEcRPLSKT
cp2acid	C	2	100	P62280	40S ribosomal protein S11	60	TYIDKKcPFTGNV
cp2acid	C	9	100	P62316	Small nuclear ribonucleoprotein Sm D2	46	TQVLINcRNNKKL
cp2acid	C	5	100	P62333	26S proteasome regulatory subunit 10B	83	PRYVVGcRRQLDK
cp2acid	C	2	100	P62333	26S proteasome regulatory subunit 10B	170	IIPPKGcLLYGPP
cp2acid	C	8	100	P62333	26S proteasome regulatory subunit 10B	193	VASQLDcNFLKVV
cp2acid	C	7	100	P62424	60S ribosomal protein L7a	182	KMGVPYcIIKGKA
cp2acid	C	3	100	P62424	60S ribosomal protein L7a	199	LVHRKTcTTVAFT
cp2acid	C	5	100	P62495	Eukaryotic peptide chain release factor subunit 1	335	MRYVLHcQGTEEE
cp2acid	C	4	100	P62753	40S ribosomal protein S6	83	LSKGHScYRPRRT
cp2acid	C	10	100	P62753	40S ribosomal protein S6	12	SFPATGcQKLIEV
cp2acid	C	2	100	P62820	Ras-related protein Rab-1A	26	SGVGKScLLLRFA
cp2acid	C	7	100	P62820	Ras-related protein Rab-1A	126	LLVGNKcDLTTKK
cp2acid	C	10	100	P62826	GTP-binding nuclear protein Ran	120	NIPIVLcGNKVDI
cp2acid	C	2	100	P62826	GTP-binding nuclear protein Ran	112	RDLVRVcENIPIV
cp2acid	C	13	100	P62829	60S ribosomal protein L23	28	VGAVINcADNTGA
cp2acid	C	2	100	P62829	60S ribosomal protein L23	125	GPVAKEcADLWPR
cp2acid	C	7	100	P62851	40S ribosomal protein S25	59	ATYDKLcKEVPNY
cp2acid	C	4	100	P62854	40S ribosomal protein S26	26	PIRCTNcARCVPK
cp2acid	C	4	100	P62854	40S ribosomal protein S26	74	YVKLHYcVSCAIH
cp2acid	C	3	100	P62877	E3 ubiquitin-protein ligase RBX1	94	LKTRQVcPLDNRE
cp2acid	C	2	100	P62888	60S ribosomal protein L30	92	GKYYRVcTLAIID
cp2acid	C	17	100	P62888	60S ribosomal protein L30	85	IELGTAcGKYYRV
cp2acid	C	8	100	P62888	60S ribosomal protein L30	52	VILANNcPALRKS
cp2acid	C	12	100	P62906	60S ribosomal protein L10a	74	LGDQQHcDEAKAV
cp2acid	C	3	100	P62906	60S ribosomal protein L10a	164	QMKKVLcLAVAVG
cp2acid	C	8	100	P62910	60S ribosomal protein L32	91	LEVLLMcNKSYCA
cp2acid	C	3	100	P62910	60S ribosomal protein L32	96	MCNKSYcAEIAHN
cp2acid	C	5	100	P62913	60S ribosomal protein L11	72	EKIAVHcTVRGAK
cp2acid	C	3	100	P62913	60S ribosomal protein L11	150	KKRRTGcIGAKHR
cp2acid	C	3	100	P62917	60S ribosomal protein L8	195	YKAKRNcWPRVRG
cp2acid	C	7	100	P62937	Peptidyl-prolyl cis-trans isomerase A	161	KITIADcGQLE
cp2acid	C	24	100	P62937	Peptidyl-prolyl cis-trans isomerase A	115	GSQFFIcTAKTEW
cp2acid	C	7	100	P62937	Peptidyl-prolyl cis-trans isomerase A	62	IIPGFMcQGGDFT
cp2acid	C	8	100	P62937	Peptidyl-prolyl cis-trans isomerase A	52	FGYKGScFHRIIP
cp2acid	C	5	100	P62942	Peptidyl-prolyl cis-trans isomerase FKBP1A	23	PKRGQTcVVHYTG
cp2acid	C	6	100	P62979	Ubiquitin-40S ribosomal protein S27a	149	KCCLTYcFNKPED
cp2acid	C	4	100	P63000	Ras-related C3 botulinum toxin substrate 1	157	AVKYLEcSALTQR
cp2acid	C	3	100	P63000	Ras-related C3 botulinum toxin substrate 1	105	PEVRHHcPNTPII
cp2acid	C	2	100	P63010	AP-2 complex subunit beta	857	QFQIKEcHLNADT
cp2acid	C	2	100	P63104	14-3-3 protein zeta/delta	189	NSPEKAcSLAKTA
cp2acid	C	4	100	P63165	Small ubiquitin-related modifier 1	52	KLKESYcQRQGVP
cp2acid	C	6	100	P63208	S-phase kinase-associated protein 1	160	RKENQWcEEK
cp2acid	C	7	100	P63208	S-phase kinase-associated protein 1	120	GLLDVTcKTVANM
cp2acid	C	2	100	P63220	40S ribosomal protein S21	17	LYVPRKcSASNRI
cp2acid	C	5	100	P63220	40S ribosomal protein S21	56	FKTYAIcGAIRRM
cp2acid	C	22	100	P63244	Receptor of activated protein C kinase 1	207	SPDGSLcASGGKD
cp2acid	C	13	100	P63244	Receptor of activated protein C kinase 1	168	NPIIVScGWDKLV
cp2acid	C	8	100	P63244	Receptor of activated protein C kinase 1	138	WNTLGVcKYTVQD
cp2acid	C	4	100	P63244	Receptor of activated protein C kinase 1	249	PNRYWLcAATGPS
cp2acid	C	7	100	P63244	Receptor of activated protein C kinase 1	182	VWNLANcKLKTNH
cp2acid	C	17	100	P63261	Actin, cytoplasmic 2	17	DNGSGMcKAGFAG
cp2acid	C	9	100	P67870	Casein kinase II subunit beta	109	QGDFGYcPRVYCE
cp2acid	C	15	100	P68104	Elongation factor 1-alpha 1	234	LLEALDcILPPTR
cp2acid	C	16	100	P68104	Elongation factor 1-alpha 1	411	VPGKPMcVESFSD
cp2acid	C	15	100	P68363	Tubulin alpha-1B chain	295	AEITNAcFEPANQ
cp2acid	C	3	100	P68363	Tubulin alpha-1B chain	376	KVQRAVcMLSNTT
cp2acid	C	8	99.9	P68363	Tubulin alpha-1B chain	316	GKYMACcLLYRGD
cp2acid	C	9	100	P68363	Tubulin alpha-1B chain	347	IQFVDWcPTGFKV
cp2acid	C	5	100	P68402	Platelet-activating factor acetylhydrolase IB subunit alpha2	35	NRFVLDcKDKEPD
cp2acid	C	7	100	P78371	T-complex protein 1 subunit beta	395	SLHDALcVLAQTV
cp2acid	C	4	100	P78417	Glutathione S-transferase omega-1	192	AMKLNEcVDHTPK
cp2acid	C	2	100	P78417	Glutathione S-transferase omega-1	32	IYSMRFcPFAERT
cp2acid	C	6	100	P82933	28S ribosomal protein S9, mitochondrial	233	KLLTSQcGAAEEE
cp2acid	C	6	100	P83731	60S ribosomal protein L24	6	MKVELcSFSGYK
cp2acid	C	3	100	P84103	Serine/arginine-rich splicing factor 3	72	LDGRTLcGCRVRV
cp2acid	C	3	100	P84103	Serine/arginine-rich splicing factor 3	6	MHRDScPLDCKV
cp2acid	C	15	100	Q00325	Phosphate carrier protein, mitochondrial	136	YSMQGLcKFGFYE
cp2acid	C	3	100	Q00325	Phosphate carrier protein, mitochondrial	237	TMMKFAcFERTVE
cp2acid	C	3	100	Q00341	Vigilin	636	TGKRANcEAARSR
cp2acid	C	2	100	Q00765	Receptor expression-enhancing protein 5	18	FLHEKNcMTDLLA
cp2acid	C	3	100	Q00839	Heterogeneous nuclear ribonucleoprotein U	594	AQRRKMcLFAGFQ
cp2acid	C	4	100	Q00839	Heterogeneous nuclear ribonucleoprotein U	562	LQRAPQcLGKFIE
cp2acid	C	4	100	Q01518	Adenylyl cyclase-associated protein 1	416	INKTDGcHAYLSK
cp2acid	C	9	100	Q01518	Adenylyl cyclase-associated protein 1	93	LVTASQcQQPAEN
cp2acid	C	5	100	Q01518	Adenylyl cyclase-associated protein 1	427	SKNSLDcEIVSAK
cp2acid	C	6	100	Q01581	Hydroxymethylglutaryl-CoA synthase, cytoplasmic	406	KITASLcDLKSRL
cp2acid	C	7	100	Q01581	Hydroxymethylglutaryl-CoA synthase, cytoplasmic	86	NNLSYDcIGRLEV
cp2acid	C	3	100	Q01813	ATP-dependent 6-phosphofructokinase, platelet type	112	GRLKAAcNLLQRG
cp2acid	C	11	100	Q02543	60S ribosomal protein L18a	109	AGAVTQcYRDMGA
cp2acid	C	9	100	Q02790	Peptidyl-prolyl cis-trans isomerase FKBP4	107	EVCHITcKPEYAY
cp2acid	C	10	100	Q02790	Peptidyl-prolyl cis-trans isomerase FKBP4	328	HLNLAMcHLKLQA
cp2acid	C	6	100	Q02790	Peptidyl-prolyl cis-trans isomerase FKBP4	396	KTQLAVcQQRIRR
cp2acid	C	11	100	Q02790	Peptidyl-prolyl cis-trans isomerase FKBP4	342	SAAIEScNKALEL
cp2acid	C	5	100	Q02878	60S ribosomal protein L6	44	KKGKPHcSRNPVL
cp2acid	C	2	100	Q02978	Mitochondrial 2-oxoglutarate/malate carrier protein	184	LTLWRGcIPTMAR
cp2acid	C	9	100	Q04637	Eukaryotic translation initiation factor 4 gamma 1	934	DEESLEcLCRLLT
cp2acid	C	16	100	Q04760	Lactoylglutathione lyase	139	PDVYSAcKRFEEL
cp2acid	C	19	100	Q04828	Aldo-keto reductase family 1 member C1	242	LEDPVLcALAKKH
cp2acid	C	6	100	Q04828	Aldo-keto reductase family 1 member C1	206	RKLLDFcKSKDIV
cp2acid	C	3	100	Q04828	Aldo-keto reductase family 1 member C1	87	YTSKLWcNSHRPE
cp2acid	C	5	100	Q04828	Aldo-keto reductase family 1 member C1	188	LKYKPVcNQVECH
cp2acid	C	7	100	Q04828	Aldo-keto reductase family 1 member C1	7	MDSKYQcVKLNDG
cp2acid	C	2	100	Q04917	14-3-3 protein eta	112	KFLIKNcNDFQYE
cp2acid	C	10	100	Q04941	Proteolipid protein 2	16	PGCWAAcTNFSRT
cp2acid	C	5	100	Q05639	Elongation factor 1-alpha 2	326	IRRGNVcGDSKSD
cp2acid	C	5	100	Q06830	Peroxiredoxin-1	173	DKHGEVcPAGWKP
cp2acid	C	15	100	Q06830	Peroxiredoxin-1	83	SVDSHFcHLAWVN
cp2acid	C	4	100	Q07020	60S ribosomal protein L18	101	VPKLKVcALRVTS
cp2acid	C	2	100	Q07020	60S ribosomal protein L18	134	LDSPKGcGTVLLS
cp2acid	C	6	100	Q07955	Serine/arginine-rich splicing factor 1	148	REAGDVcYADVYR
cp2acid	C	8	100	Q07955	Serine/arginine-rich splicing factor 1	16	PAGNNDcRIYVGN
cp2acid	C	8	100	Q07960	Rho GTPase-activating protein 1	91	IIVFSAcRMPPSH
cp2acid	C	4	100	Q08257	Quinone oxidoreductase	45	LIKVHAcGVNPVE
cp2acid	C	7	100	Q08257	Quinone oxidoreductase	145	ALIHSAcVKAGES
cp2acid	C	4	100	Q10471	Polypeptide N-acetylgalactosaminyltransferase 2	126	DTRHDQcQRKQWR
cp2acid	C	2	100	Q10567	AP-1 complex subunit beta-1	866	QFQIRDcPLNAEA
cp2acid	C	7	100	Q10713	Mitochondrial-processing peptidase subunit alpha	466	KLPHELcTLIRNV
cp2acid	C	5	100	Q12765	Secernin-1	324	PKTQSPcFGDDDP
cp2acid	C	3	100	Q12765	Secernin-1	188	EGVRCIcSQLSLT
cp2acid	C	6	100	Q12792	Twinfilin-1	275	RMLYSScKSRLLE
cp2acid	C	3	100	Q12797	Aspartyl/asparaginyl beta-hydroxylase	384	RYGKAQcEDDLAE
cp2acid	C	7	100	Q12874	Splicing factor 3A subunit 3	145	YLDLHDcYLKYIN
cp2acid	C	6	100	Q12904	Aminoacyl tRNA synthase complex-interacting multifunctional protein 1	211	RMVILLcNLKPAK
cp2acid	C	3	100	Q12904	Aminoacyl tRNA synthase complex-interacting multifunctional protein 1	161	LDLRIGcIITARK
cp2acid	C	2	100	Q12907	Vesicular integral-membrane protein VIP36	239	KNEWKNcIDITGV
cp2acid	C	3	100	Q12931	Heat shock protein 75 kDa, mitochondrial	261	IHLKSDcKEFSSE
cp2acid	C	2	100	Q12982	BCL2/adenovirus E1B 19 kDa protein-interacting protein 2	229	LGWLRKcYQQIDR
cp2acid	C	2	100	Q13011	Delta(3,5)-Delta(2,4)-dienoyl-CoA isomerase, mitochondrial	187	ACDIRYcAQDAFF
cp2acid	C	5	100	Q13011	Delta(3,5)-Delta(2,4)-dienoyl-CoA isomerase, mitochondrial	92	WREMVEcFNKISR
cp2acid	C	9	99.8	Q13057	Bifunctional coenzyme A synthase	144	TSCYSCcPRLASV
cp2acid	C	4	100	Q13098	COP9 signalosome complex subunit 1	341	ESKYAScLKMLDE
cp2acid	C	5	100	Q13098	COP9 signalosome complex subunit 1	192	SRARDYcTSAKHV
cp2acid	C	8	100	Q13098	COP9 signalosome complex subunit 1	67	QFIADHcPTLRVE
cp2acid	C	7	100	Q13151	Heterogeneous nuclear ribonucleoprotein A0	7	MENSQLcKLFIGG
cp2acid	C	6	100	Q13200	26S proteasome non-ATPase regulatory subunit 2	779	KGTLTLcPYHSDR
cp2acid	C	10	100	Q13283	Ras GTPase-activating protein-binding protein 1	73	SQNFTNcHTKIRH
cp2acid	C	4	100	Q13330	Metastasis-associated protein MTA1	229	FARALDcSSSVRQ
cp2acid	C	11	100	Q13347	Eukaryotic translation initiation factor 3 subunit I	76	GSADNScRLWDCE
cp2acid	C	3	100	Q13404	Ubiquitin-conjugating enzyme E2 variant 1	71	YSLKIEcGPKYPE
cp2acid	C	2	100	Q13505	Metaxin-1	326	YREAREcLTLLSQ
cp2acid	C	6	100	Q13509	Tubulin beta-3 chain	303	KNMMAAcDPRHGR
cp2acid	C	5	100	Q13541	Eukaryotic translation initiation factor 4E-binding protein 1	62	RKFLMEcRNSPVT
cp2acid	C	6	100	Q13596	Sorting nexin-1	318	KLQEVEcEEQRLR
cp2acid	C	6	100	Q13838	Spliceosome RNA helicase DDX39B	239	KEIRPVcRKFMQD
cp2acid	C	3	100	Q13907	Isopentenyl-diphosphate Delta-isomerase 1	172	NEIKSYcYVSKEE
cp2acid	C	22	100	Q14019	Coactosin-like protein	52	QHFIQQcTDDVRL
cp2acid	C	6	100	Q14019	Coactosin-like protein	10	KIDKEAcRAAYNL
cp2acid	C	7	100	Q14103	Heterogeneous nuclear ribonucleoprotein D0	126	FGEVVDcTLKLDP
cp2acid	C	6	100	Q14116	Interleukin-18	112	KISTLScENKIIS
cp2acid	C	2	100	Q14152	Eukaryotic translation initiation factor 3 subunit A	160	WESYRQcLDLLRN
cp2acid	C	2	100	Q14152	Eukaryotic translation initiation factor 3 subunit A	185	QQAFKFcLQYTRK
cp2acid	C	3	100	Q14152	Eukaryotic translation initiation factor 3 subunit A	78	YQYKNIcQQVNIK
cp2acid	C	2	100	Q14247	Src substrate cortactin	112	SKLSKHcSQVDSV
cp2acid	C	5	100	Q14444	Caprin-1	226	GKEKPVcGTTYKV
cp2acid	C	3	100	Q14533	Keratin, type II cuticular Hb1	301	SWYRSKcEEMKAT
cp2acid	C	7	100	Q14566	DNA replication licensing factor MCM6	721	LGFSEYcRISNLI
cp2acid	C	9	100	Q14651	Plastin-1	166	ADGILLcKMINLS
cp2acid	C	9	100	Q14653	Interferon regulatory factor 3	222	FQQTIScPEGLRL
cp2acid	C	6	100	Q14657	EKC/KEOPS complex subunit LAGE3	113	RWKAEDcRLLRIS
cp2acid	C	2	100	Q14697	Neutral alpha-glucosidase AB	41	RSNFKTcEESSFC
cp2acid	C	2	100	Q14790	Caspase-8	164	DILKRVcAQINKS
cp2acid	C	2	100	Q14847	LIM and SH3 domain protein 1	29	KFWHKAcFHCETC
cp2acid	C	3	100	Q14847	LIM and SH3 domain protein 1	20	PTEKVNcLDKFWH
cp2acid	C	4	100	Q14847	LIM and SH3 domain protein 1	53	YEKKPYcNAHYPK
cp2acid	C	4	100	Q14914	Prostaglandin reductase 1	239	FGRIAIcGAISTY
cp2acid	C	13	100	Q14974	Importin subunit beta-1	228	VCEATQcPDTRVR
cp2acid	C	2	100	Q14974	Importin subunit beta-1	543	KNSAKDcYPAVQK
cp2acid	C	8	100	Q15004	PCNA-associated factor	54	AGGNPVcVRPTPK
cp2acid	C	7	100	Q15008	26S proteasome non-ATPase regulatory subunit 6	188	VYQGLYcVAIRDF
cp2acid	C	5	100	Q15008	26S proteasome non-ATPase regulatory subunit 6	112	AKAEYLcRIGDKE
cp2acid	C	9	100	Q15008	26S proteasome non-ATPase regulatory subunit 6	266	LFSLYEcRYSVFF
cp2acid	C	15	100	Q15019	Septin-2	111	YGDAINcRDCFKT
cp2acid	C	5	100	Q15029	116 kDa U5 small nuclear ribonucleoprotein component	780	TREGPLcDELIRN
cp2acid	C	5	100	Q15041	ADP-ribosylation factor-like protein 6-interacting protein 1	109	QRFHEIcSNLVKT
cp2acid	C	6	100	Q15067	Peroxisomal acyl-coenzyme A oxidase 1	531	RASEAHcHYVVVK
cp2acid	C	7	100	Q15102	Platelet-activating factor acetylhydrolase IB subunit alpha1	205	LGYTPVcRALHSL
cp2acid	C	10	100	Q15165	Serum paraoxonase/arylesterase 2	42	SVDLPHcHLIKGI
cp2acid	C	5	100	Q15185	Prostaglandin E synthase 3	40	SKLTFScLGGSDN
cp2acid	C	5	99.9	Q15185	Prostaglandin E synthase 3	76	DRSILCcLRKGES
cp2acid	C	3	100	Q15233	Non-POU domain-containing octamer-binding protein	145	LRVRFAcHSASLT
cp2acid	C	3	100	Q15257	Serine/threonine-protein phosphatase 2A activator	334	RMYKAEcLEKFPV
cp2acid	C	9	100	Q15286	Ras-related protein Rab-35	110	HEINQNcDDVCRI
cp2acid	C	2	100	Q15363	Transmembrane emp24 domain-containing protein 2	93	DGTYKFcFSNRMS
cp2acid	C	8	100	Q15365	Poly(rC)-binding protein 1	109	VVPATQcGSLIGK
cp2acid	C	14	100	Q15365	Poly(rC)-binding protein 1	158	PQSVTEcVKQICL
cp2acid	C	8	100	Q15365	Poly(rC)-binding protein 1	54	NISEGNcPERIIT
cp2acid	C	14	100	Q15366	Poly(rC)-binding protein 2	158	PQSIIEcVKQICV
cp2acid	C	8	100	Q15366	Poly(rC)-binding protein 2	54	NISEGNcPERIIT
cp2acid	C	8	100	Q15366	Poly(rC)-binding protein 2	109	VVPASQcGSLIGK
cp2acid	C	5	100	Q15369	Elongin-C	11	EKTYGGcEGPDAM
cp2acid	C	5	100	Q15370	Elongin-B	60	GKTLGEcGFTSQT
cp2acid	C	8	100	Q15428	Splicing factor 3A subunit 2	56	HLGSYEcKLCLTL
cp2acid	C	7	100	Q15436	Protein transport protein Sec23A	74	AVLNPLcQVDYRA
cp2acid	C	7	100	Q15459	Splicing factor 3A subunit 1	244	EVLDQVcYRVEWA
cp2acid	C	11	100	Q15560	Transcription elongation factor A protein 2	261	QTDLFTcGKCRKK
cp2acid	C	6	100	Q15691	Microtubule-associated protein RP/EB family member 1	228	RNIELIcQENEGE
cp2acid	C	6	100	Q15738	Sterol-4-alpha-carboxylate 3-dehydrogenase, decarboxylating	132	KNVIETcKEAGVQ
cp2acid	C	6	100	Q15813	Tubulin-specific chaperone E	141	RNCAVScAGEKGG
cp2acid	C	3	100	Q15819	Ubiquitin-conjugating enzyme E2 variant 2	69	YSLKVEcGPKYPE
cp2acid	C	9	100	Q16181	Septin-7	204	TLTPEEcQQFKKQ
cp2acid	C	5	100	Q16186	Proteasomal ubiquitin receptor ADRM1	88	FKRVPQcPSGRVY
cp2acid	C	9	100	Q16531	DNA damage-binding protein 1	378	QGQLVTcSGAFKE
cp2acid	C	5	100	Q16543	Hsp90 co-chaperone Cdc37	64	KRKVAEcQRKLKE
cp2acid	C	10	100	Q16555	Dihydropyrimidinase-related protein 2	248	IANQTNcPLYITK
cp2acid	C	14	100	Q16563	Synaptophysin-like protein 1	193	IDELPPcKKKAVL
cp2acid	C	13	100	Q16630	Cleavage and polyadenylation specificity factor subunit 6	159	NPVVTPcNKQFLS
cp2acid	C	12	100	Q16658	Fascin	80	KDGNVTcEREVPG
cp2acid	C	7	100	Q16658	Fascin	89	EVPGPDcRFLIVA
cp2acid	C	8	100	Q16658	Fascin	397	EHGFIGcRKVTGT
cp2acid	C	8	100	Q16719	Kynureninase	327	QLIPGVcGFRISN
cp2acid	C	9	100	Q16836	Hydroxyacyl-coenzyme A dehydrogenase, mitochondrial	211	GKHPVScKDTPGF
cp2acid	C	12	100	Q16881	Thioredoxin reductase 1, cytoplasmic	214	TCVNVGcIPKKLM
cp2acid	C	3	100	Q16881	Thioredoxin reductase 1, cytoplasmic	577	CYAKIIcNTKDNE
cp2acid	C	2	100	Q2TAA2	Isoamyl acetate-hydrolyzing esterase 1 homolog	47	DRLVRKcDVLNRG
cp2acid	C	6	100	Q3ZCW2	Galectin-related protein	41	RLIVPFcGHIKGG
cp2acid	C	3	100	Q52LJ0	Protein FAM98B	295	SREKTAcAINKVL
cp2acid	C	4	100	Q53FA7	Quinone oxidoreductase PIG3	228	WEKNVNcLALDGR
cp2acid	C	9	100	Q53GQ0	Very-long-chain 3-oxoacyl-CoA reductase	215	VDFFSQcLHEEYR
cp2acid	C	10	100	Q53GQ0	Very-long-chain 3-oxoacyl-CoA reductase	166	INILSVcKMTQLV
cp2acid	C	9	100	Q53H82	Endoribonuclease LACTB2	100	NNDTTYcIKKLPR
cp2acid	C	7	100	Q5JS54	Proteasome assembly chaperone 4	55	NLAVAMcSRYDSI
cp2acid	C	6	100	Q5RKV6	Exosome complex component MTR3	248	RLGLEGcQRLYPV
cp2acid	C	2	100	Q5SSJ5	Heterochromatin protein 1-binding protein 3	359	MNEPKTcSTTALK
cp2acid	C	7	100	Q5T8D3	Acyl-CoA-binding domain-containing protein 5	83	QATEGPcKLSRPG
cp2acid	C	5	100	Q5TFE4	5'-nucleotidase domain-containing protein 1	197	GRYLHScPESVKK
cp2acid	C	5	100	Q5VTU8	ATP synthase subunit epsilon-like protein, mitochondrial	19	IRYSQIcAKVVRD
cp2acid	C	5	100	Q5VW32	BRO1 domain-containing protein BROX	288	AKAEALcKEYGET
cp2acid	C	7	100	Q6FI81	Anamorsin	92	ILRPGGcLFLKEP
cp2acid	C	6	100	Q6GMV2	Histone-lysine N-trimethyltransferase SMYD5	194	RLFSQFcNKTANE
cp2acid	C	12	100	Q6NUQ4	Transmembrane protein 214	529	PASQQAcAKLYSY
cp2acid	C	4	100	Q6P1N9	Putative deoxyribonuclease TATDN1	123	FDRLQFcPKDTQL
cp2acid	C	5	100	Q6P996	Pyridoxal-dependent decarboxylase domain-containing protein 1	361	ERIKHAcQLSQRL
cp2acid	C	13	100	Q6UW02	Cytochrome P450 20A1	409	FSGTQEcPELRFA
cp2acid	C	3	100	Q6YN16	Hydroxysteroid dehydrogenase-like protein 2	166	VWFKQHcAYTIAK
cp2acid	C	8	99.9	Q71U36	Tubulin alpha-1A chain	316	GKYMACcLLYRGD
cp2acid	C	15	100	Q71U36	Tubulin alpha-1A chain	295	AEITNAcFEPANQ
cp2acid	C	3	100	Q71U36	Tubulin alpha-1A chain	376	KVQRAVcMLSNTT
cp2acid	C	9	100	Q71U36	Tubulin alpha-1A chain	347	IQFVDWcPTGFKV
cp2acid	C	5	100	Q71UM5	40S ribosomal protein S27-like	77	ARLTEGcSFRRKQ
cp2acid	C	5	100	Q7L1Q6	Basic leucine zipper and W2 domain-containing protein 1	349	LKIQEYcYDNIHF
cp2acid	C	5	100	Q7L2H7	Eukaryotic translation initiation factor 3 subunit M	125	VRYTVYcSLIKVA
cp2acid	C	9	100	Q7L2H7	Eukaryotic translation initiation factor 3 subunit M	175	YEALVDcKKSDAA
cp2acid	C	5	100	Q7L2H7	Eukaryotic translation initiation factor 3 subunit M	134	IKVAAScGAIQYI
cp2acid	C	5	100	Q7L5D6	Golgi to ER traffic protein 4 homolog	160	WKEQNYcESRYHF
cp2acid	C	2	100	Q7L5N1	COP9 signalosome complex subunit 6	299	GTITKTcNTMNQF
cp2acid	C	5	100	Q7L9L4	MOB kinase activator 1B	109	IKKPIKcSAPKYI
cp2acid	C	2	100	Q7LBR1	Charged multivesicular body protein 1b	25	SRSAKKcDKEEKA
cp2acid	C	5	100	Q7Z4G4	tRNA (guanine(10)-N2)-methyltransferase homolog	5	MALScTLNRYL
cp2acid	C	6	100	Q7Z7F0	KH homology domain-containing protein 4	280	RGKGSGcIEPASG
cp2acid	C	10	100	Q86TM6	E3 ubiquitin-protein ligase synoviolin	139	ISWLFHcRIVSLM
cp2acid	C	6	100	Q86WA8	Lon protease homolog 2, peroxisomal	572	RKLGAIcRAVAVK
cp2acid	C	7	100	Q86WR0	Coiled-coil domain-containing protein 25	83	ANSIQGcKMNNVN
cp2acid	C	2	100	Q86X76	Deaminated glutathione amidase	67	QQNFKTcAELVRE
cp2acid	C	8	100	Q86X76	Deaminated glutathione amidase	292	SEGPGLcLARIDL
cp2acid	C	6	100	Q86X76	Deaminated glutathione amidase	203	KIGLAVcYDMRFP
cp2acid	C	12	100	Q86XP3	ATP-dependent RNA helicase DDX42	281	QPTPIQcQGVPVA
cp2acid	C	15	100	Q8IVD9	NudC domain-containing protein 3	260	SLEPGKcVLVNLS
cp2acid	C	6	100	Q8IX04	Ubiquitin-conjugating enzyme E2 variant 3	319	RVIGIGcNLDSQR
cp2acid	C	4	100	Q8IYB3	Serine/arginine repetitive matrix protein 1	33	QLKFAEcLEKKVD
cp2acid	C	13	100	Q8N163	Cell cycle and apoptosis regulator protein 2	238	TVDSPIcDFLELQ
cp2acid	C	7	100	Q8N163	Cell cycle and apoptosis regulator protein 2	754	VVTQNIcQYRSLQ
cp2acid	C	7	100	Q8N8S7	Protein enabled homolog	7	MSEQSIcQARAAV
cp2acid	C	11	100	Q8N8S7	Protein enabled homolog	62	HQVVINcAIPKGL
cp2acid	C	3	100	Q8NBJ7	Inactive C-alpha-formylglycine-generating enzyme 2	156	NDARAYcAWRGKR
cp2acid	C	8	100	Q8NBX0	Saccharopine dehydrogenase-like oxidoreductase	238	RWPISYcRELKGY
cp2acid	C	2	100	Q8NBZ7	UDP-glucuronic acid decarboxylase 1	230	PIGPRAcYDEGKR
cp2acid	C	7	100	Q8NFF5	FAD synthase	147	SLGVQVcRVSVVP
cp2acid	C	3	100	Q8TDX7	Serine/threonine-protein kinase Nek7	53	EVYRAAcLLDGVP
cp2acid	C	6	100	Q8WUY1	Protein THEM6	168	RVVQHLcQRRVEP
cp2acid	C	3	100	Q8WUY1	Protein THEM6	29	YLVRLPcAVLRAR
cp2acid	C	7	100	Q8WVC6	Dephospho-CoA kinase domain-containing protein	135	HTVVVYcDRDTQL
cp2acid	C	7	100	Q8WVM8	Sec1 family domain-containing protein 1	485	ALTDAGcNLNPLQ
cp2acid	C	4	100	Q8WVV9	Heterogeneous nuclear ribonucleoprotein L-like	405	GKRLNVcVSKQHS
cp2acid	C	2	100	Q8WVV9	Heterogeneous nuclear ribonucleoprotein L-like	535	PYTLKLcFSTSSH
cp2acid	C	5	100	Q8WVX9	Fatty acyl-CoA reductase 1	34	EKLLRScPKVNSV
cp2acid	C	3	100	Q8WW59	SPRY domain-containing protein 4	114	DMSRDScIGVDDR
cp2acid	C	5	100	Q8WWC4	m-AAA protease-interacting protein 1, mitochondrial	162	SKLLSQcKFDLLE
cp2acid	C	4	100	Q8WX93	Palladin	964	EYKVSScEQRLIS
cp2acid	C	11	100	Q92552	28S ribosomal protein S27, mitochondrial	276	PEDIKLcREALDV
cp2acid	C	7	100	Q92688	Acidic leucine-rich nuclear phosphoprotein 32 family member B	123	SLDLFNcEVTNLN
cp2acid	C	4	100	Q92688	Acidic leucine-rich nuclear phosphoprotein 32 family member B	114	PLKKLEcLKSLDL
cp2acid	C	7	100	Q92688	Acidic leucine-rich nuclear phosphoprotein 32 family member B	27	ELVLDNcKSNDGK
cp2acid	C	3	100	Q92841	Probable ATP-dependent RNA helicase DDX17	277	SRLKSTcIYGGAP
cp2acid	C	2	100	Q92879	CUGBP Elav-like family member 1	119	GMISKKcTENDIR
cp2acid	C	8	100	Q92905	COP9 signalosome complex subunit 5	218	EDFGVHcKQYYAL
cp2acid	C	7	100	Q92945	Far upstream element-binding protein 2	176	IQQDSGcKVQISP
cp2acid	C	4	100	Q92973	Transportin-1	467	LVRSITcWTLSRY
cp2acid	C	3	100	Q92973	Transportin-1	103	DFIKSEcLNNIGD
cp2acid	C	6	100	Q92973	Transportin-1	205	RSHAVAcVNQFII
cp2acid	C	3	100	Q93009	Ubiquitin carboxyl-terminal hydrolase 7	315	NKMKGTcVEGTIP
cp2acid	C	7	100	Q969E2	Secretory carrier-associated membrane protein 4	20	FIPVKPcFYQNFS
cp2acid	C	8	100	Q969G6	Riboflavin kinase	8	RHLPYFcRGQVVR
cp2acid	C	8	100	Q969Q0	60S ribosomal protein L36a-like	77	ECVEPNcRSKRML
cp2acid	C	2	100	Q96A00	Protein phosphatase 1 regulatory subunit 14A	100	QGLLKScGKPVED
cp2acid	C	5	100	Q96A35	39S ribosomal protein L24, mitochondrial	190	ERTYVPcLKTLQE
cp2acid	C	5	100	Q96AG4	Leucine-rich repeat-containing protein 59	131	AKVAGDcLDEKQC
cp2acid	C	8	100	Q96AG4	Leucine-rich repeat-containing protein 59	48	TILDLScNKLTTL
cp2acid	C	9	100	Q96AG4	Leucine-rich repeat-containing protein 59	59	TLPSDFcGLTHLV
cp2acid	C	4	100	Q96BJ3	Axin interactor, dorsalization-associated protein	69	IGKIATcLELRSA
cp2acid	C	9	100	Q96BM9	ADP-ribosylation factor-like protein 8A	164	CCYSIScKEKDNI
cp2acid	C	15	100	Q96EE3	Nucleoporin SEH1	77	GQVLAScSFDRTA
cp2acid	C	5	100	Q96EK6	Glucosamine 6-phosphate N-acetyltransferase	157	YKITLEcLPQNVG
cp2acid	C	4	100	Q96EK6	Glucosamine 6-phosphate N-acetyltransferase	150	LSKKLNcYKITLE
cp2acid	C	12	100	Q96EK6	Glucosamine 6-phosphate N-acetyltransferase	128	VVVSDEcRGKQLG
cp2acid	C	30	100	Q96EK6	Glucosamine 6-phosphate N-acetyltransferase	45	LVLRPLcTADLNR
cp2acid	C	4	100	Q96EL3	39S ribosomal protein L53, mitochondrial	21	QVRVQFcPFEKNV
cp2acid	C	7	100	Q96EP5	DAZ-associated protein 1	85	NIDPKPcTPRGMQ
cp2acid	C	4	100	Q96ER3	Protein SAAL1	248	VFRLVPcILEAAK
cp2acid	C	8	100	Q96FJ2	Dynein light chain 2, cytoplasmic	56	YNPTWHcIVGRNF
cp2acid	C	4	100	Q96FQ6	Protein S100-A16	4	MSDcYTELEK
cp2acid	C	8	100	Q96FW1	Ubiquitin thioesterase OTUB1	91	TRPDGNcFYRAFG
cp2acid	C	7	100	Q96FX7	tRNA (adenine(58)-N(1))-methyltransferase catalytic subunit TRMT61A	209	FCSFSPcIEQVQR
cp2acid	C	2	100	Q96FX7	tRNA (adenine(58)-N(1))-methyltransferase catalytic subunit TRMT61A	217	EQVQRTcQALAAR
cp2acid	C	5	100	Q96GG9	DCN1-like protein 1	29	EKTAVScLSQNDW
cp2acid	C	5	100	Q96GG9	DCN1-like protein 1	115	FRAATQcEFSKQE
cp2acid	C	6	100	Q96HC4	PDZ and LIM domain protein 5	479	KFFAPEcGRCQRK
cp2acid	C	6	100	Q96KB5	Lymphokine-activated killer T-cell-originated protein kinase	70	KKINPIcNDHYRS
cp2acid	C	4	100	Q96KP4	Cytosolic non-specific dipeptidase	205	LGKKKPcITYGLR
cp2acid	C	3	100	Q96MF6	Coenzyme Q-binding protein COQ10 homolog A, mitochondrial	161	HMVKAVcTDGKLF
cp2acid	C	8	100	Q96PU8	Protein quaking	119	LEAETGcKIMVRG
cp2acid	C	6	100	Q96QK1	Vacuolar protein sorting-associated protein 35	156	RNYLLQcTRNILP
cp2acid	C	2	100	Q96QK1	Vacuolar protein sorting-associated protein 35	286	NPFLRAcAELHQN
cp2acid	C	7	100	Q96S97	Myeloid-associated differentiation marker	288	SHAYYVcAWDRRL
cp2acid	C	6	100	Q96S97	Myeloid-associated differentiation marker	279	RSRDVScSRSHAY
cp2acid	C	12	100	Q99436	Proteasome subunit beta type-7	74	VVADKNcSKIHFI
cp2acid	C	4	100	Q99442	Translocation protein SEC62	55	ASKAVDcLLDSKW
cp2acid	C	2	100	Q99460	26S proteasome non-ATPase regulatory subunit 1	184	AYSLKLcMSLMQN
cp2acid	C	8	100	Q99460	26S proteasome non-ATPase regulatory subunit 1	898	LTMPETcRYQPFK
cp2acid	C	2	100	Q99471	Prefoldin subunit 5	49	YVEAKDcLNVLNK
cp2acid	C	5	100	Q99497	Parkinson disease protein 7	53	SRDVVIcPDASLE
cp2acid	C	14	100	Q99497	Parkinson disease protein 7	46	GKDPVQcSRDVVI
cp2acid	C	2	100	Q99536	Synaptic vesicle membrane protein VAT-1 homolog	86	TLRLRAcGLNFAD
cp2acid	C	6	100	Q99538	Legumain	219	RESSYAcYYDEKR
cp2acid	C	6	100	Q99538	Legumain	50	RHQADAcHAYQII
cp2acid	C	3	100	Q99595	Mitochondrial import inner membrane translocase subunit Tim17-A	9	EYAREPcPWRIVD
cp2acid	C	2	100	Q99613	Eukaryotic translation initiation factor 3 subunit C	752	MGDWKTcHSFIIN
cp2acid	C	7	100	Q99613	Eukaryotic translation initiation factor 3 subunit C	500	GTTEEVcRIYLLR
cp2acid	C	2	100	Q99613	Eukaryotic translation initiation factor 3 subunit C	443	PLRVRGcILTLVE
cp2acid	C	3	100	Q99643	Succinate dehydrogenase cytochrome b560 subunit, mitochondrial	107	ELVKSLcLGPALI
cp2acid	C	6	100	Q99714	3-hydroxyacyl-CoA dehydrogenase type-2	58	KKLGNNcVFAPAD
cp2acid	C	2	100	Q99714	3-hydroxyacyl-CoA dehydrogenase type-2	214	SLPEKVcNFLASQ
cp2acid	C	2	100	Q99717	Mothers against decapentaplegic homolog 5	310	NNKSRFcLGLLSN
cp2acid	C	9	100	Q99729	Heterogeneous nuclear ribonucleoprotein A/B	224	TVSGSKcEIKVAQ
cp2acid	C	10	100	Q99808	Equilibrative nucleoside transporter 1	378	VPLLLLcNIKPRR
cp2acid	C	3	100	Q99832	T-complex protein 1 subunit eta	450	IIPRQLcDNAGFD
cp2acid	C	2	100	Q99832	T-complex protein 1 subunit eta	370	CPKAKTcTFILRG
cp2acid	C	7	100	Q99832	T-complex protein 1 subunit eta	364	YNFFTGcPKAKTC
cp2acid	C	11	100	Q99873	Protein arginine N-methyltransferase 1	272	TFTSPFcLQVKRN
cp2acid	C	7	100	Q99873	Protein arginine N-methyltransferase 1	119	KVIGIEcSSISDY
cp2acid	C	4	100	Q99873	Protein arginine N-methyltransferase 1	360	DFKGQLcELSCST
cp2acid	C	7	100	Q99873	Protein arginine N-methyltransferase 1	250	QLVTNAcLIKEVD
cp2acid	C	3	100	Q9BQB6	Vitamin K epoxide reductase complex subunit 1	43	RDYRALcDVGTAI
cp2acid	C	9	100	Q9BRP1	Programmed cell death protein 2-like	82	HVFACAcPGCSTG
cp2acid	C	7	100	Q9BRR6	ADP-dependent glucokinase	40	SLWSSLcLGPAPA
cp2acid	C	2	100	Q9BRT2	Ubiquinol-cytochrome-c reductase complex assembly factor 2	13	RRFLKLcEEWPVD
cp2acid	C	9	100	Q9BSJ8	Extended synaptotagmin-1	995	VSIVHGcRSLRQN
cp2acid	C	7	100	Q9BSJ8	Extended synaptotagmin-1	522	AVYSTNcPVWEEA
cp2acid	C	7	100	Q9BSJ8	Extended synaptotagmin-1	370	LGTQTFcSRVIDE
cp2acid	C	11	100	Q9BUP3	Oxidoreductase HTATIP2	172	RPGVLLcDRQESR
cp2acid	C	5	100	Q9BV86	N-terminal Xaa-Pro-Lys N-methyltransferase 1	64	NKTGTScALDCGA
cp2acid	C	19	100	Q9BWD1	Acetyl-CoA acetyltransferase, cytosolic	360	PLGASGcRILVTL
cp2acid	C	5	100	Q9BYJ4	Tripartite motif-containing protein 34	108	EKLLLFcKEDRKV
cp2acid	C	8	100	Q9BYT8	Neurolysin, mitochondrial	153	VHLQETcDLGKIK
cp2acid	C	5	100	Q9BZV2	Thiamine transporter 2	143	QRVSGYcRSVTLA
cp2acid	C	4	100	Q9BZZ5	Apoptosis inhibitor 5	241	VDRLLQcTRQAVP
cp2acid	C	11	100	Q9GZQ3	COMM domain-containing protein 5	64	SLQGEDcREAVQR
cp2acid	C	5	100	Q9GZT8	NIF3-like protein 1	213	TRINLNcTQKALM
cp2acid	C	4	100	Q9GZV4	Eukaryotic translation initiation factor 5A-2	38	VLKGRPcKIVEMS
cp2acid	C	6	100	Q9GZV4	Eukaryotic translation initiation factor 5A-2	73	KKYEDIcPSTHNM
cp2acid	C	6	100	Q9H063	Repressor of RNA polymerase III transcription MAF1 homolog	203	RIVFFScRSISGS
cp2acid	C	2	100	Q9H074	Polyadenylate-binding protein-interacting protein 1	470	EAYEKFcLESERK
cp2acid	C	6	100	Q9H0D6	5'-3' exoribonuclease 2	557	RYYYQGcASWKWY
cp2acid	C	5	100	Q9H0U6	39S ribosomal protein L18, mitochondrial	125	TRNVVAcESIGRV
cp2acid	C	3	100	Q9H0V9	VIP36-like protein	104	LWNRVPcFLRDWE
cp2acid	C	3	100	Q9H1C4	Protein unc-93 homolog B1	583	GLGRRPcPYEQAQ
cp2acid	C	4	100	Q9H2U2	Inorganic pyrophosphatase 2, mitochondrial	180	GSKILScGEVIHV
cp2acid	C	3	100	Q9H3K6	BolA-like protein 2	33	TLNRCScSFRVLV
cp2acid	C	12	100	Q9H3N1	Thioredoxin-related transmembrane protein 1	106	LPTIYHcKDGEFR
cp2acid	C	5	100	Q9H477	Ribokinase	59	GKGANQcVQAARL
cp2acid	C	9	100	Q9H479	Fructosamine-3-kinase	24	GGPGAGcISEGRA
cp2acid	C	8	100	Q9H4A4	Aminopeptidase B	151	GEGPGVcWLAPEQ
cp2acid	C	5	100	Q9H4A4	Aminopeptidase B	181	NRAFFPcFDTPAV
cp2acid	C	2	100	Q9H4G0	Band 4.1-like protein 1	367	KRLWKVcIEHHTF
cp2acid	C	5	100	Q9H832	Ubiquitin-conjugating enzyme E2 Z	100	ERTAPQcLLRIKR
cp2acid	C	11	100	Q9H8Y8	Golgi reassembly-stacking protein 2	173	NTDTDNcREVIIT
cp2acid	C	4	100	Q9HA64	Ketosamine-3-kinase	11	LRRELGcSSVRAT
cp2acid	C	9	100	Q9HA64	Ketosamine-3-kinase	24	GHSGGGcISQGRS
cp2acid	C	5	100	Q9HAV4	Exportin-5	221	SKAQANcRVGVAA
cp2acid	C	8	100	Q9HAV7	GrpE protein homolog 1, mitochondrial	108	YGIQAFcKDLLEV
cp2acid	C	3	100	Q9HB07	MYG1 exonuclease	305	GQWRIQcVPKEPH
cp2acid	C	8	100	Q9HB71	Calcyclin-binding protein	154	DTVLILcRKKVEN
cp2acid	C	3	100	Q9HBL8	NmrA-like family domain-containing protein 1	154	TSVRLPcYFENLL
cp2acid	C	10	100	Q9HC38	Glyoxalase domain-containing protein 4	197	GYADNQcKLELQG
cp2acid	C	11	100	Q9HCU8	DNA polymerase delta subunit 4	61	AWQYGPcTGITRL
cp2acid	C	7	100	Q9HD33	39S ribosomal protein L47, mitochondrial	87	SGAAWTcQQLRNK
cp2acid	C	7	100	Q9HD45	Transmembrane 9 superfamily member 3	66	YFSLPFcVGSKKS
cp2acid	C	10	100	Q9HD45	Transmembrane 9 superfamily member 3	428	GQPNFPcRVNAVP
cp2acid	C	6	100	Q9HDC9	Adipocyte plasma membrane-associated protein	140	RFGSGPcKTRDDE
cp2acid	C	7	100	Q9NP79	Vacuolar protein sorting-associated protein VTA1 homolog	155	ATYIHNcLKNGET
cp2acid	C	3	100	Q9NPB8	Glycerophosphocholine phosphodiesterase GPCPD1	462	IEIKWIcQQRDGM
cp2acid	C	2	100	Q9NPH2	Inositol-3-phosphate synthase 1	485	LFRQRScIENILR
cp2acid	C	6	100	Q9NPL8	Complex I assembly factor TIMMDC1, mitochondrial	78	KDLANIcKTAATA
cp2acid	C	11	100	Q9NQC3	Reticulon-4	1101	ALGHVNcTIKELR
cp2acid	C	16	100	Q9NQR4	Omega-amidase NIT2	146	TFDTPYcRVGLGI
cp2acid	C	7	100	Q9NQR4	Omega-amidase NIT2	44	IVSLPEcFNSPYG
cp2acid	C	2	100	Q9NQR4	Omega-amidase NIT2	25	DNVTRAcSFIREA
cp2acid	C	6	100	Q9NQR4	Omega-amidase NIT2	153	RVGLGIcYDMRFA
cp2acid	C	8	100	Q9NRP0	Oligosaccharyltransferase complex subunit OSTC	14	PFLVLEcPNLKLK
cp2acid	C	7	100	Q9NRX4	14 kDa phosphohistidine phosphatase	73	QGCDCEcLGGGRI
cp2acid	C	3	100	Q9NRX4	14 kDa phosphohistidine phosphatase	69	DMQKQGcDCECLG
cp2acid	C	16	100	Q9NUJ1	Palmitoyl-protein thioesterase ABHD10, mitochondrial	239	SPIPVNcPIRLLH
cp2acid	C	8	100	Q9NUJ1	Palmitoyl-protein thioesterase ABHD10, mitochondrial	100	LAIEEFcKSLGHA
cp2acid	C	4	100	Q9NVS2	39S ribosomal protein S18a, mitochondrial	186	LLRDNVcYSRTPW
cp2acid	C	5	100	Q9NVT9	Armadillo repeat-containing protein 1	69	LRYLAEcRANREK
cp2acid	C	3	100	Q9NVT9	Armadillo repeat-containing protein 1	161	TSRRNLcEEALLK
cp2acid	C	3	100	Q9NWU5	39S ribosomal protein L22, mitochondrial	166	IMEKVYcHYFVKL
cp2acid	C	8	100	Q9NWU5	39S ribosomal protein L22, mitochondrial	70	PAEIYHcRRQIKY
cp2acid	C	6	100	Q9NX08	COMM domain-containing protein 8	32	KIIDGIcGRAYPV
cp2acid	C	5	100	Q9NX61	Transmembrane protein 161A	25	HRLAPHcSFARWL
cp2acid	C	2	100	Q9NXG2	THUMP domain-containing protein 1	31	AKRARRcDAGGPR
cp2acid	C	11	100	Q9NY33	Dipeptidyl peptidase 3	509	ASSYEEcRAESVG
cp2acid	C	2	100	Q9NYL2	Mitogen-activated protein kinase kinase kinase 20	150	DGVLKIcDFGASR
cp2acid	C	5	100	Q9NYP7	Elongation of very long chain fatty acids protein 5	96	GKYNFFcQGTRTA
cp2acid	C	7	100	Q9NYP7	Elongation of very long chain fatty acids protein 5	61	NKQPFScRGILVV
cp2acid	C	2	100	Q9NZ01	Very-long-chain enoyl-CoA reductase	18	KTREKLcFLDKVE
cp2acid	C	9	100	Q9NZD2	Glycolipid transfer protein	176	NVTEEEcLEKIRL
cp2acid	C	5	100	Q9NZK7	Group IIE secretory phospholipase A2	108	QRLTCEcDKRAAL
cp2acid	C	3	100	Q9NZK7	Group IIE secretory phospholipase A2	106	TCQRLTcECDKRA
cp2acid	C	7	100	Q9NZL4	Hsp70-binding protein 1	201	LLDRDAcDTVRVK
cp2acid	C	15	100	Q9NZN4	EH domain-containing protein 2	356	PGDFPDcQKMQEL
cp2acid	C	2	100	Q9P035	Very-long-chain (3R)-3-hydroxyacyl-CoA dehydratase 3	173	NLTVRFcILGKES
cp2acid	C	6	100	Q9P0L0	Vesicle-associated membrane protein-associated protein A	179	RKLMEEcKRLQGE
cp2acid	C	3	100	Q9P258	Protein RCC2	144	GPHRYGcLAGVRV
cp2acid	C	8	100	Q9P258	Protein RCC2	280	NLYSFGcPEYGQL
cp2acid	C	4	100	Q9P258	Protein RCC2	337	VVRDVAcGANHTL
cp2acid	C	6	100	Q9P258	Protein RCC2	428	KAVQDLcGWRIRS
cp2acid	C	4	100	Q9P2R7	Succinate--CoA ligase [ADP-forming] subunit beta, mitochondrial	430	GLKILAcDDLDEA
cp2acid	C	8	100	Q9P2R7	Succinate--CoA ligase [ADP-forming] subunit beta, mitochondrial	158	CNQVLVcERKYPR
cp2acid	C	6	100	Q9UBB4	Ataxin-10	95	RNACIEcSVNQNS
cp2acid	C	7	100	Q9UBE0	SUMO-activating enzyme subunit 1	342	GNGIVEcLGPK
cp2acid	C	5	100	Q9UBE0	SUMO-activating enzyme subunit 1	146	VKVDQIcHKNSIK
cp2acid	C	6	100	Q9UBE0	SUMO-activating enzyme subunit 1	214	KKKVVFcPVKEAL
cp2acid	C	9	100	Q9UBI6	Guanine nucleotide-binding protein G(I)/G(S)/G(O) subunit gamma-12	43	ADLMSYcEEHARS
cp2acid	C	3	100	Q9UBM1	Phosphatidylethanolamine N-methyltransferase	70	NFLRSHcFTQAML
cp2acid	C	13	100	Q9UBQ5	Eukaryotic translation initiation factor 3 subunit K	85	HTDFTLcKCMIDQ
cp2acid	C	13	100	Q9UBV2	Protein sel-1 homolog 1	550	ELFKNVcERGRWS
cp2acid	C	2	100	Q9UBV2	Protein sel-1 homolog 1	539	TGVMRScHTAVEL
cp2acid	C	8	100	Q9UGP8	Translocation protein SEC63 homolog	295	NEPPLTcPYSLKA
cp2acid	C	3	100	Q9UHD1	Cysteine and histidine-rich domain-containing protein 1	86	TEKKELcELKPKF
cp2acid	C	5	100	Q9UHD1	Cysteine and histidine-rich domain-containing protein 1	5	MALLcYNRGCG
cp2acid	C	3	100	Q9UHG3	Prenylcysteine oxidase 1	258	GGNKLVcSGLLQA
cp2acid	C	2	100	Q9UHX1	Poly(U)-binding-splicing factor PUF60	255	FGKIKScTLARDP
cp2acid	C	6	100	Q9UHX1	Poly(U)-binding-splicing factor PUF60	129	RALAIMcRVYVGS
cp2acid	C	6	100	Q9UI14	Prenylated Rab acceptor protein 1	64	RNLGELcQRLVRN
cp2acid	C	2	100	Q9UI30	Multifunctional methyltransferase subunit TRM112-like protein	33	ATEVRIcPVEFNP
cp2acid	C	5	100	Q9UIQ6	Leucyl-cystinyl aminopeptidase	305	ARSAFPcFDEPAF
cp2acid	C	5	100	Q9UJA5	tRNA (adenine(58)-N(1))-methyltransferase non-catalytic subunit TRM6	243	VRAATAcFGFPKS
cp2acid	C	7	100	Q9UK45	U6 snRNA-associated Sm-like protein LSm7	76	QLGLVVcRGTSVV
cp2acid	C	2	100	Q9UKD2	mRNA turnover protein 4 homolog	33	IEELRKcVDTYKY
cp2acid	C	12	100	Q9UKD2	mRNA turnover protein 4 homolog	176	LSDYEVcKEGDVL
cp2acid	C	7	100	Q9UKK6	NTF2-related export protein 1	14	TYVDQAcRAAEEF
cp2acid	C	5	100	Q9UKK6	NTF2-related export protein 1	132	WKIASDcFRFQDW
cp2acid	C	3	100	Q9UKR5	Ergosterol biosynthetic protein 28 homolog	67	SVIRCLcAIDIHN
cp2acid	C	8	100	Q9UL25	Ras-related protein Rab-21	29	VLLGEGcVGKTSL
cp2acid	C	5	100	Q9UL46	Proteasome activator complex subunit 2	5	MAKPcGVRLSG
cp2acid	C	10	100	Q9ULC4	Malignant T-cell-amplified sequence 1	14	KENVSNcIQLKTS
cp2acid	C	8	100	Q9UMR2	ATP-dependent RNA helicase DDX19B	393	LVTTNVcARGIDV
cp2acid	C	5	100	Q9UMY4	Sorting nexin-12	67	FKLKEScVRRRYS
cp2acid	C	9	100	Q9UN86	Ras GTPase-activating protein-binding protein 2	73	SLNFSEcHTKIRH
cp2acid	C	9	100	Q9UNM6	26S proteasome non-ATPase regulatory subunit 13	114	DEAVILcKTAIGA
cp2acid	C	5	100	Q9UNM6	26S proteasome non-ATPase regulatory subunit 13	357	DRLEFWcTDVKSM
cp2acid	C	4	100	Q9UNM6	26S proteasome non-ATPase regulatory subunit 13	182	ALRFLGcVDIKDL
cp2acid	C	10	100	Q9UNS2	COP9 signalosome complex subunit 3	104	DTFAGLcHQLTNA
cp2acid	C	12	100	Q9UNS2	COP9 signalosome complex subunit 3	25	GQMTQLcELINKS
cp2acid	C	2	100	Q9UNS2	COP9 signalosome complex subunit 3	298	MGLVKQcLSSLYK
cp2acid	C	6	100	Q9UQ80	Proliferation-associated protein 2G4	296	RMGVVEcAKHELL
cp2acid	C	5	100	Q9UQ80	Proliferation-associated protein 2G4	149	IKAAHLcAEAALR
cp2acid	C	7	100	Q9UQ80	Proliferation-associated protein 2G4	179	VAHSFNcTPIEGM
cp2acid	C	5	100	Q9Y221	60S ribosome subunit biogenesis protein NIP7 homolog	153	AKSTQDcRKVDPM
cp2acid	C	7	100	Q9Y224	RNA transcription, translation and transport factor protein	69	YLRDVNcPFKIQD
cp2acid	C	4	100	Q9Y230	RuvB-like 2	227	QTKFVQcPDGELQ
cp2acid	C	6	100	Q9Y237	Peptidyl-prolyl cis-trans isomerase NIMA-interacting 4	45	KVRHILcEKHGKI
cp2acid	C	5	100	Q9Y277	Voltage-dependent anion-selective channel protein 3	229	AKYMLDcRTSLSA
cp2acid	C	7	100	Q9Y281	Cofilin-2	80	LLPLNDcRYALYD
cp2acid	C	5	100	Q9Y281	Cofilin-2	39	KKAVLFcLSDDKR
cp2acid	C	12	100	Q9Y285	Phenylalanine--tRNA ligase alpha subunit	493	VYDSPLcRLDAEP
cp2acid	C	7	100	Q9Y2Q3	Glutathione S-transferase kappa 1	176	ETTEAAcRYGAFG
cp2acid	C	3	100	Q9Y2Q9	28S ribosomal protein S28, mitochondrial	122	FGGKFHcVCRRPE
cp2acid	C	2	100	Q9Y2S7	Polymerase delta-interacting protein 2	143	LIDARDcPHISQR
cp2acid	C	13	100	Q9Y2Z0	Protein SGT1 homolog	49	DDAQYYcQRAYCH
cp2acid	C	3	100	Q9Y320	Thioredoxin-related transmembrane protein 2	186	LSLKYNcTGLNFG
cp2acid	C	8	100	Q9Y3B7	39S ribosomal protein L11, mitochondrial	50	VSINQFcKEFNER
cp2acid	C	3	100	Q9Y3C1	Nucleolar protein 16	36	AAPRIEcSHIRHA
cp2acid	C	2	100	Q9Y3C6	Peptidyl-prolyl cis-trans isomerase-like 1	133	TIFGRVcQGIGMV
cp2acid	C	5	100	Q9Y3E5	Peptidyl-tRNA hydrolase 2, mitochondrial	86	GKVAAQcSHAAVS
cp2acid	C	2	100	Q9Y3E5	Peptidyl-tRNA hydrolase 2, mitochondrial	36	GWSLRVcFGMLPK
cp2acid	C	8	100	Q9Y3F4	Serine-threonine kinase receptor-associated protein	270	HFGPIHcVRFSPD
cp2acid	C	7	100	Q9Y3U8	60S ribosomal protein L36	48	DMIREVcGFAPYE
cp2acid	C	9	100	Q9Y490	Talin-1	1661	APGQLEcETAIAA
cp2acid	C	8	100	Q9Y490	Talin-1	2196	VAAGNScRQEDVI
cp2acid	C	5	100	Q9Y4C5	Carbohydrate sulfotransferase 2	295	ARFEEEcRKYRTL
cp2acid	C	21	100	Q9Y4Y9	U6 snRNA-associated Sm-like protein LSm5	21	LELVDKcIGSRIH
cp2acid	C	2	100	Q9Y570	Protein phosphatase methylesterase 1	238	VGQVKQcEGITSP
cp2acid	C	9	100	Q9Y570	Protein phosphatase methylesterase 1	312	SNLFLScPIPKLL
cp2acid	C	9	100	Q9Y5K5	Ubiquitin carboxyl-terminal hydrolase isozyme L5	191	PIDLGAcNQDDWI
cp2acid	C	2	100	Q9Y5L0	Transportin-3	125	MPSWKGcVQTLVE
cp2acid	C	4	100	Q9Y5L0	Transportin-3	793	DHRDANcSVMRFL
cp2acid	C	6	100	Q9Y5L0	Transportin-3	527	KAIHNIcSVCRDH
cp2acid	C	4	100	Q9Y5R8	Trafficking protein particle complex subunit 1	115	VVKNPLcPLGQTV
cp2acid	C	2	100	Q9Y617	Phosphoserine aminotransferase	224	GFALREcPSVLEY
cp2acid	C	7	100	Q9Y696	Chloride intracellular channel protein 4	234	DEFTNTcPSDKEV
cp2acid	C	11	100	Q9Y696	Chloride intracellular channel protein 4	35	GESIGNcPFSQRL
cp2acid	C	4	100	Q9Y6E0	Serine/threonine-protein kinase 24	394	KEKSQAcGGNLGS
cp2acid	C	5	100	Q9Y6E2	Basic leucine zipper and W2 domain-containing protein 2	350	QKVQEYcYDNIHF
cp2acid	C	5	100	Q9Y6E2	Basic leucine zipper and W2 domain-containing protein 2	270	ERLSQEcPIKEVV
cp2acid	C	6	100	Q9Y6M9	NADH dehydrogenase [ubiquinone] 1 beta subcomplex subunit 9	31	RHLESWcVQRDKY
cp2acid	C	5	100	Q9Y6N1	Cytochrome c oxidase assembly protein COX11, mitochondrial	219	NKIQCFcFEEQRL

## Sheet: TableSI-1All annotated peptides
1332 modified peptides by CP2 from MCF-7 cell lysates
Annotated Sequence	Modifications	PSMs	Positions in Master Proteins	Missed Cleavages	Theo. MH+ [Da]	Charge	m/z [Da]	Xcorr
LNEDMACSVAGITSDANVLTNELR	1xCarbamidomethyl [C7]; 1xcp2acid [E3]	1	P25789 [68-91]	0	2908.38	3	970.131	3.42
SCGKPVEDFIQELLAK	1xcp2acid [S/C/G/K/P/V/E/D/F/I/Q/L/A]	1	Q96A00 [99-114]	0	2092.08	3	698.032	3.35
HSSYTCICGSGENSAVLHYGHAGAPNDR	1xCarbamidomethyl [C8]; 1xcp2acid [C6]	1	P12955 [238-265]	0	3275.44	4	819.617	5.09
HTGPGILSMANAGPNTNGSQFFICTAK	1xcp2acid [C24(99.4)]	4	P62937 [92-118]	0	3049.47	3	1017.16	8.07
SAPSIPKENFSCLTR	1xcp2acid [C12(99.4)]	2	P40925 [143-157]	1	1964.99	3	655.667	2.93
HVLTGSADNSCR	1xcp2acid [C11(99.4)]	1	Q13347 [66-77]	0	1574.74	3	525.586	2.71
HVVFTAETHNFPTGVCPFSGATTGTGGR	1xcp2acid [C16(100)]	3	O15067 [303-330]	0	3163.51	3	1055.17	6
HSFDTFSHQRPCLLK	1xcp2acid [P/C/L/R/H/S/F/D/T/Q/K]	4	P51648 [414-428]	0	2131.05	4	533.52	4.56
KADPQEAINCLMR	1xcp2acid [C10(99.6)]	1	P54920 [94-106]	1	1803.89	3	601.968	2.52
KAHEILPNLVCCSAK	1xcp2acid [C/S/A/K/H/E/I/L/P/N/V]; 1xCarbamidomethyl [C]	8	P50990 [138-152]	1	1998.03	4	500.262	5.08
KAQCPIVER	1xcp2acid [C4(99.7)]	3	P46782 [63-71]	1	1358.72	2	679.865	3.16
RVNQAIWLLCTGAR	1xcp2acid [C10(99.8)]	5	P46782 [146-159]	1	1916.03	3	639.348	4.48
KCAADLGLNK	1xcp2acid [C2(99)]	2	P49773 [83-92]	1	1347.71	2	674.357	3.56
RVCEEIAIIPSKK	1xcp2acid [C3(99.3)]	1	P08708 [33-45]	2	1801	3	601.007	3.33
KCLEELQK	1xcp2acid [C2(100)]	2	P49721 [162-169]	1	1305.69	2	653.347	3.3
RWPISYCR	1xcp2acid [C7(100)]	4	Q8NBX0 [232-239]	1	1395.7	2	698.355	2.68
KCLEELQKR	1xcp2acid [C2(99.7)]	4	P49721 [162-170]	2	1461.79	3	487.934	3.6
HRPQVAIICGSGLGGLTDK	1xcp2acid [C9(99.1)]	1	P00491 [23-41]	0	2237.19	3	746.394	3.35
HMNLILCDCDEFRK	1xcp2acid [C7(99.8)]; 1xCarbamidomethyl [C9(100)]	2	P14678 [37-50]	1	2108.97	3	703.663	2.87
HELQANCYEEVKDR	1xcp2acid [C7(100)]	3	P23528 [133-146]	1	2048.95	3	683.653	5.45
SCLVRPLMNDEGLK	1xcp2acid [S1(99.7)]; 1xCarbamidomethyl [C2(100)]	2	P30838 [427-440]	0	1946.98	3	649.663	2.92
SCLVRPLMNDEGLK	1xcp2acid [C2(98.4)]	5	P30838 [427-440]	0	1889.96	3	630.659	2.24
HFCPNVPIILVGNKK	1xcp2acid [C3(98.9)]	5	P61586 [105-119]	1	1994.1	3	665.37	4.99
HFIMQVVCEATQCPDTR	1xcp2acid [C13(99.5)]; 1xCarbamidomethyl [C8(100)]	2	Q14974 [216-232]	0	2350.08	3	784.033	3.63
HFVGMLPEKDCR	1xcp2acid [C11(99.6)]	1	P60981 [70-81]	1	1746.85	3	582.951	3.08
HQADACHAYQIIHR	1xcp2acid [C6(99.8)]	4	Q99538 [45-58]	0	1977.95	4	495.243	4.88
HGEVCPAGWKPGSDTIKPDVQK	1xcp2acid [C5(99.7)]	2	Q06830 [169-190]	0	2664.32	4	666.835	3.52
SCLLLQFTDKR	1xcp2acid [S/C/L/Q/F/T/D/K/R]	9	P61019 [20-30]	1	1638.87	3	546.96	3.77
HHCPNTPIILVGTK	1xcp2acid [C3(99.5)]	6	P63000 [103-116]	0	1844.98	3	615.665	3.99
HIDCAYVYQNEHEVGEAIQEK	1xcp2acid [C4(99.7)]	5	O60218 [42-62]	0	2790.28	3	930.765	9.15
HIDCAYVYQNEHEVGEAIQEK	1xcp2acid [I/D/A/H/C/Y/V/Q/N/E/G/K]; 1xCarbamidomethyl [C4(100)]	5	O60218 [42-62]	0	2847.3	3	949.775	5.46
SCLLHQFTEK	1xcp2acid [S/C/L/H/Q/F/T/E/K]	2	P61106 [25-34]	0	1520.76	2	760.882	2.95
SCHTAVELFKNVCER	1xcp2acid [C/E/V/R/S/H/T/A/L/F/K/N]; 1xCarbamidomethyl [C2(100)]	1	Q9UBV2 [538-552]	1	2108.01	4	527.756	2.79
SCLLLQFTDKR	1xcp2acid [S1(99.7)]; 1xCarbamidomethyl [C2(100)]	2	P61019 [20-30]	1	1695.89	3	565.968	2.5
SECLNNIGDSSPLIR	1xcp2acid [C3(99.5)]	3	Q92973 [101-115]	0	1932.95	2	966.975	3.17
RSIQFVDWCPTGFK	1xcp2acid [C9(99.7)]	4	P68363 [339-352]	1	1998.99	3	667.001	2.72
KCPFTGNVSIR	1xcp2acid [K1(99.7)]; 1xCarbamidomethyl [C2(100)]	9	P62280 [59-69]	1	1593.82	3	531.945	2.68
QVFQQTISCPEGLR	1xcp2acid [C9(99.2)]	1	Q14653 [214-227]	0	1920.96	2	960.985	3
KKPCITYGLR	1xcp2acid [C4(99.6)]	1	Q96KP4 [202-211]	1	1493.83	3	498.614	2.91
QVCPLDNREWEFQK	1xcp2acid [C3(99.1)]	4	P62877 [92-105]	1	2107.01	3	703.007	3.25
KICALDDNVCMAFAGLTADAR	1xcp2acid [D7(97.5)]; 1xCarbamidomethyl [C10(100)]	5	O14818 [61-81]	1	2570.22	3	857.407	3.27
QTISNACGTIGLIHAIANNKDK	1xcp2acid [C7(98.6)]	3	P15374 [89-110]	1	2597.35	4	650.094	4.44
KIENCNYAVELGK	1xcp2acid [C5(99.7)]	3	Q14651 [457-469]; P13797 [459-471]	1	1795.9	3	599.307	4.18
KGTVEGFEPADNKCLLR	1xcp2acid [C14(99.5)]	1	P37108 [43-59]	2	2192.12	3	731.374	5.07
QTISNACGTIGLIHAIANNK	1xcp2acid [C7(99.6)]	3	P15374 [89-108]	0	2354.23	3	785.416	4.18
QTIGNSCGTIGLIHAVANNQDKLGFEDGSVLK	1xcp2acid [G/N/S/C/I/T/Q/L/H/A/V/D/K/F/E]	4	P09936 [84-115]	1	3614.83	4	904.463	6.41
QTIGNSCGTIGLIHAVANNQDK	1xcp2acid [N/S/Q/T/I/G/C/L/H/A/V/D/K]; 1xCarbamidomethyl [C7(100)]	1	P09936 [84-105]	0	2626.3	3	876.11	3.19
QTIGNSCGTIGLIHAVANNQDK	1xcp2acid [S/C/N/Q/T/I/G/L/H/A/V/D/K]	4	P09936 [84-105]	0	2569.28	3	857.1	5.99
KLGNNCVFAPADVTSEKDVQTALALAK	1xcp2acid [C6(98)]	2	Q99714 [53-79]	2	3118.62	4	780.413	5.4
QLVTNACLIK	1xcp2acid [C7(99.1)]	5	Q99873 [244-253]	0	1417.79	2	709.395	2.41
QITSYGETCPGLEQYAIKK	1xcp2acid [C9(99.7)]	3	P50990 [422-440]	1	2444.22	3	815.411	4.93
KLENCNYAVELGKHPAK	1xcp2acid [N/C/K/L/E/Y/A/V/G/H/P]	2	P13797 [459-475]	2	2229.15	4	558.043	5.18
KCPFTGNVSIR	1xcp2acid [C2(99.8)]	9	P62280 [59-69]	1	1536.8	3	512.938	3.86
KGCVITISGR	1xcp2acid [C3(100)]	1	O00154 [286-295]	1	1348.74	2	674.873	3.16
QYLFSLYECR	1xcp2acid [C9(99.6)]	4	Q15008 [258-267]	0	1636.78	2	818.895	2.85
KCPFYAAEQDKGALEGSSCPFR	1xcp2acid [C19(99.7)]; 1xCarbamidomethyl [C2(100)]	1	P30519 [264-285]	2	2776.29	4	694.827	2.98
RRWPISYCR	1xcp2acid [C8(99.6)]	2	Q8NBX0 [231-239]	2	1551.8	3	517.938	2.49
RPPSAFFLFCSEYRPK	1xcp2acid [C10(100)]	8	P09429 [97-112]	0	2260.14	3	754.05	4.58
KCSTPEEIKK	1xcp2acid [C2(99.6)]	1	P60981 [22-31]	2	1477.77	3	493.263	2.57
RPCPYEQAQGGDGPEEQ	1xcp2acid [C3(99.2)]	1	Q9H1C4 [581-597]	0	2175.94	2	1088.47	4.96
RNLADCLR	1xcp2acid [C6(100)]	4	P49721 [86-93]	1	1275.66	2	638.335	2.91
QWNNCAFLESSAK	1xcp2acid [C5(99.4)]	3	P61224 [137-149]	0	1812.84	2	906.925	2.72
KCYEMASHLR	1xcp2acid [K/Y/E/C/M/A/S/H/L/R]; 1xCarbamidomethyl [C2(100)]	5	P07737 [127-136]	1	1609.76	3	537.26	2.57
KDGNASGTTLLEALDCILPPTRPTDKPLR	1xcp2acid [C16(99.4)]	4	P68104 [219-247]	1	3407.8	5	682.367	4
RGPCIIYNEDNGIIK	1xcp2acid [R/G/P/C/I/Y/N/E/D/K]	5	P36578 [205-219]	1	2020.03	3	674.016	3.63
RCLYASVLTAQPR	1xcp2acid [C/L/R/Y/A/S/V/T/Q/P]	3	P13639 [727-739]	1	1792.95	3	598.321	3.85
KENQWCEEK	1xcp2acid [C6(99.7)]	1	P63208 [155-163]	1	1508.68	2	754.848	3.65
KFDEKENVSNCIQLK	1xcp2acid [N/C/I/K/F/D/E/V/S/Q/L]	1	Q9ULC4 [4-18]	2	2110.06	3	704.027	4.96
KFPVFNPATEEELCQVEEGDKEDVDK	1xcp2acid [L/C/Q/K/F/P/V/N/A/T/E/G/D]	3	P00352 [37-62]	2	3310.55	4	828.389	6.6
RGQTCVVHYTGMLEDGKK	1xcp2acid [C5(99.6)]	1	P62942 [19-36]	2	2337.15	4	585.042	4.69
QLSAQGQMTQLCELINK	1xcp2acid [C12(99.1)]	1	Q9UNS2 [14-30]	0	2220.12	3	740.711	3.74
SEGGFIWACK	1xcp2acid [C9(99.7)]	2	O75874 [261-270]	0	1412.67	2	706.835	3.13
SGDAAIVDMVPGKPMCVESFSDYPPLGR	1xcp2acid [C16(99.5)]	3	P68104 [396-423]	0	3253.54	3	1085.18	4.98
GCWDSIHVVEVQEK	1xcp2acid [G/C/W/D/S/I/H/V/E/Q/K]	2	P47756 [146-159]	0	1943.93	3	648.649	3.54
GCWDSIHVVEVQEK	1xcp2acid [G1(99.5)]; 1xCarbamidomethyl [C2(100)]	1	P47756 [146-159]	0	2000.95	3	667.656	1.85
SYCAEIAHNVSSK	1xcp2acid [C3(99.7)]	5	P62910 [94-106]	0	1723.81	3	575.274	2.57
SVSAFAPICNPVLCPWGKK	1xcp2acid [C14(98.7)]; 1xCarbamidomethyl [C9(100)]	3	P10768 [168-186]	1	2389.22	3	797.078	3.98
SVSAFAPICNPVLCPWGK	1xcp2acid [L/C/V/P/S/A/F/I/N/W/G/K]; 1xCarbamidomethyl [C9(100)]	1	P10768 [168-185]	0	2261.12	2	1131.07	4.07
STLTDSLVCK	1xcp2acid [C9(99.8)]	7	P13639 [33-42]	0	1381.7	2	691.357	3.13
SYCAEIAHNVSSK	1xcp2acid [S/Y/A/C/E/I/H/N/V/K]; 1xCarbamidomethyl [C3(100)]	2	P62910 [94-106]	0	1780.83	3	594.284	2.07
GEVPCTVTSASPLEEATLSELK	1xcp2acid [P4(99.8)]	1	P48047 [137-158]	0	2576.28	2	1288.64	4.96
SSPVEFECINEK	1xcp2acid [C8(99.3)]	1	O75131 [242-253]	0	1696.79	2	848.902	2.51
SSGFLPASQQACAK	1xcp2acid [C/A/K/S/G/F/L/P/Q]	2	Q6NUQ4 [518-531]	0	1709.83	2	855.422	3.35
GFGFVCFSSPEEATK	1xcp2acid [C6(99.7)]	1	P11940 [334-348]	0	1920.88	2	960.948	3.02
GFGHIGIAVPDVYSACK	1xcp2acid [A/C/S/K/G/F/H/I/V/P/D/Y]	3	Q04760 [124-140]	0	2049.03	3	683.681	4.08
GFGYKGSCFHR	1xcp2acid [C8(99.8)]	7	P62937 [45-55]	1	1573.74	3	525.25	3.11
IIYGGSVTGATCK	1xcp2acid [T/C/G/A/K/I/Y/S/V]	3	P60174 [207-219]	0	1584.81	2	792.908	2.36
GEVPCTVTSASPLEEATLSELK	1xcp2acid [P4(99)]; 1xCarbamidomethyl [C5(100)]	3	P48047 [137-158]	0	2633.3	3	878.441	2.9
GHFGPIHCVR	1xcp2acid [C8(99.6)]	2	Q9Y3F4 [263-272]	0	1437.72	3	479.911	2.27
SYCNDQSTGDIK	1xcp2acid [C3(100)]	1	P00492 [104-115]	0	1645.72	2	823.365	2.6
GCTATLGNFAK	1xcp2acid [G/C/T/A/L/N/F/K]	2	P15880 [228-238]	0	1397.69	2	699.347	2.39
TDGFGIDTCR	1xcp2acid [C9(99.6)]	8	P04632 [136-145]	0	1399.63	2	700.32	3.32
GAGTDEGCLIEILASR	1xcp2acid [C8(97.6)]	1	P09525 [101-116]	0	1919.95	3	640.657	3.72
TDDYLDQPCYETINR	1xcp2acid [C9(99.5)]	4	P50395 [194-208]	0	2160.95	2	1080.98	3.68
TCTTVAFTQVNSEDKGALAK	1xcp2acid [T/C/V/A/F/Q/N/S/E/D/K/G/L]	2	P62424 [198-217]	1	2399.19	3	800.401	4.09
GAVEKGEELSCEER	1xcp2acid [C/E/S/G/A/V/K/L/R]	1	P31947 [28-41]	1	1850.86	3	617.626	3.26
GCALQCAILSPAFK	1xcp2acid [G/C/A/L/Q/I/S/P/F/K]; 1xCarbamidomethyl [C6(100)]	1	O95757 [375-388]; P34932 [375-388]	0	1793.91	2	897.452	3.6
GCTATLGNFAK	1xcp2acid [G1(100)]; 1xCarbamidomethyl [C2(100)]	4	P15880 [228-238]	0	1454.71	2	727.86	2.74
TCNTMNQFVNK	1xcp2acid [T/C/N/M/Q/F/V/K]	2	Q7L5N1 [298-308]	0	1614.74	2	807.874	2.13
TAVCDIPPR	1xcp2acid [C4(100)]	51	P07437 [351-359]; P68371 [351-359]	0	1286.66	2	643.832	3.34
TATAVAHCKR	1xcp2acid [C8(99.6)]	2	P62249 [18-27]	1	1372.72	3	458.242	3.2
TATAVAHCK	1xcp2acid [C8(99.8)]	3	P62249 [18-26]	0	1216.61	2	608.812	2.84
SYLYQILQGIVFCHSR	1xcp2acid [C13(99.6)]	1	P06493 [107-122]	0	2242.15	2	1121.58	4.99
GCITIIGGGDTATCCAK	1xcp2acid [G/C/I/T/D/A/K]; 2xCarbamidomethyl [C14(100); C15(100)]	3	P00558 [366-382]	0	2012.92	2	1006.97	4.1
GCITIIGGGDTATCCAK	1xcp2acid [G1(100)]; 3xCarbamidomethyl [C2(100); C14(100); C15(100)]	2	P00558 [366-382]	0	2069.95	2	1035.48	3.45
GCDVVVIPAGVPR	1xcp2acid [G/C/D/V/I/P/A/R]	3	P40926 [92-104]	0	1596.86	2	798.932	3.08
SGAAWTCQQLR	1xcp2acid [C7(99.5)]	1	Q9HD33 [81-91]	0	1535.74	2	768.375	2.51
GKDCAVIVTQK	1xcp2acid [C/A/D/G/K/V/I/T/Q]	3	P60900 [44-54]	1	1476.79	3	492.933	3.42
SQICDNAALYAQK	1xcp2acid [C4(99.8)]	2	P55060 [269-281]	0	1739.84	2	870.422	3.35
GQKCEFQDAYVLLSEKK	1xcp2acid [K/C/E/G/Q/F/D/A/Y/V/L/S]	6	P10809 [234-250]	2	2301.16	4	576.044	4.19
SLDLFNCEVTNLNDYR	1xcp2acid [C7(99.8)]	1	P39687 [117-132]; Q92688 [117-132]	0	2231.04	2	1116.03	4.75
SICTTVLELLDK	1xcp2acid [C3(100)]	1	P27348 [92-103]	0	1649.88	2	825.444	2.13
SLCLGPALIHTAK	1xcp2acid [C3(99.5)]	6	Q99643 [105-117]	0	1638.9	3	546.973	2.73
GRPCKIVEMSTSK	1xcp2acid [P/C/G/R/K/I/V/E/M/S/T]	2	Q9GZV4 [35-47]	1	1750.9	3	584.305	3.59
SKLTFSCLGGSDNFK	1xcp2acid [S/C/L/K/T/F/G/D/N]	5	Q15185 [34-48]	1	1918.94	2	959.974	2.95
GQKCEFQDAYVLLSEK	1xcp2acid [K3(98.7)]; 1xCarbamidomethyl [C4(100)]	3	P10809 [234-249]	1	2230.08	3	744.033	3.09
SKGFGFVCFSSPEEATK	1xcp2acid [C8(99.4)]	2	P11940 [332-348]	1	2136.01	3	712.675	3.33
GVCTEAGMYALR	1xcp2acid [C3(99.7)]	1	P62195 [361-372]	0	1585.75	2	793.379	2.87
SHFEQWGTLTDCVVMR	1xcp2acid [C12(99.4)]	3	P09651 [32-47]	0	2224.03	3	742.018	3.29
SHCFTQAMLSQPR	1xcp2acid [C/F/S/H/T/Q/A/M/L/P/R]	2	Q9UBM1 [68-80]	0	1820.86	3	607.624	3.64
SHAVACVNQFIISR	1xcp2acid [C6(99.8)]	3	Q92973 [200-213]	0	1859.96	3	620.658	4.08
SGQGAFGNMCR	1xcp2acid [C10(99.4)]	5	P36578 [87-97]	0	1442.63	2	721.819	3.08
SGDAAIVDMVPGKPMCVESFSDYPPLGR	1xCarbamidomethyl [C16]; 1xcp2acid [D/M/G/V/P]	9	P68104 [396-423]	0	3310.56	4	828.393	3.72
SHFEQWGTLTDCVVMRDPNTKR	1xcp2acid [C12(99.2)]	5	P09651 [32-53]	2	2935.4	4	734.608	5.4
SSDEAVILCK	1xcp2acid [C9(99.4)]	1	Q9UNM6 [106-115]	0	1379.69	2	690.346	2.89
GQKCEFQDAYVLLSEK	1xcp2acid [C4(100)]	3	P10809 [234-249]	1	2173.06	2	1087.03	4.2
SLDLFNCEVTNLNDYRENVFK	1xcp2acid [N/C/F/E/S/L/D/V/T/Y/R/K]	1	P39687 [117-137]	1	2848.36	3	950.129	5.53
SQETECTYFSTPLLLGK	1xcp2acid [C6(99.8)]	4	P40926 [280-296]	0	2232.09	2	1116.55	4.22
SPCYVDKNCDLDVACRR	1xcp2acid [C3(100)]; 2xCarbamidomethyl [C9(100); C15(100)]	2	P30838 [215-231]	2	2386.07	3	796.031	4.03
SPCYVDKNCDLDVACR	1xcp2acid [S/P/C/Y/V/D/K/N/L/A/R]; 3xCarbamidomethyl [C3(100); C9(100); C15(100)]	1	P30838 [215-230]	1	2286.99	3	763.001	3.54
GLCAIAQAESLR	1xcp2acid [C3(100)]	8	P23396 [95-106]	0	1546.8	2	773.908	3.06
GLCAIAQAESLR	1xcp2acid [G/L/C/A/I/Q/E/S/R]; 1xCarbamidomethyl [C3(100)]	5	P23396 [95-106]	0	1603.83	3	535.28	2.21
SPCYVDKNCDLDVACR	1xcp2acid [C15(99.6)]; 2xCarbamidomethyl [C3(100); C9(100)]	8	P30838 [215-230]	1	2229.97	3	743.996	5.43
GPCIIYNEDNGIIK	1xcp2acid [C3(99.2)]	1	P36578 [206-219]	0	1863.93	2	932.474	2.26
GIFPVLCKDPVQEAWAEDVDLR	1xcp2acid [C7(99.8)]	1	P14618 [468-489]	1	2815.41	3	939.139	6.52
GLGTDEDSLIEIICSR	1xcp2acid [C14(99.5)]	1	P07355 [120-135]	0	2036	2	1018.51	3.6
SPCIVLADADLDNAVEFAHHGVFYHQGQCCIAASR	2xCarbamidomethyl [C3; C29]; 1xcp2acid [C30]	8	P00352 [274-308]	0	4186.93	5	838.191	7.42
SLWSSLCLGPAPAPPGPVSPEGR	1xcp2acid [C7(98.4)]	1	Q9BRR6 [34-56]	0	2590.31	2	1295.65	3.74
SIQFVDWCPTGFK	1xcp2acid [C8(99.3)]	2	P68363 [340-352]	0	1842.89	2	921.944	3.04
SLHDALCVLAQTVK	1xcp2acid [C7(99.7)]	1	P78371 [389-402]	0	1812.97	3	604.993	1.87
SIEIPRPVDGVEVPGCGK	1xcp2acid [P/G/C/S/I/E/R/V/D/K]	5	P26368 [414-431]	0	2167.12	3	723.047	4.39
GIFPVLCKDPVQEAWAEDVDLR	1xcp2acid [G1(98)]; 1xCarbamidomethyl [C7(100)]	1	P14618 [468-489]	1	2872.43	3	958.145	4.93
FTPPLEDSCFHYGFNSNYLKK	1xcp2acid [E/D/S/C/F/H/P/L/Y/T/G/N/K]	1	P07099 [72-92]	1	2822.33	4	706.34	3.32
QLCDNAGFDATNILNK	1xcp2acid [C3(99.4)]	1	Q99832 [448-463]	0	2051.99	2	1026.5	3.39
QKVHCLNTLFSR	1xcp2acid [C5(99.3)]	4	P26196 [320-331]	1	1760.93	3	587.646	2.84
IGPALSCGNTVVVKPAEQTPLTALHVASLIK	1xCarbamidomethyl [C7]; 1xcp2acid [N/L/V]	6	P00352 [180-210]	0	3499.93	4	875.738	5.44
LVILANNCPALR	1xcp2acid [C8(99.2)]	3	P62888 [45-56]	0	1611.9	2	806.455	3.27
LGTDESKFNAVLCSR	1xcp2acid [C13(98.7)]	2	P50995 [372-386]	1	1954.97	3	652.328	2.85
LVFVPLLLLCNIKPR	1xcp2acid [C10(99.2)]	1	Q99808 [369-383]	0	2053.24	2	1027.12	2.29
IVEDEPNKICEADR	1xcp2acid [C10(99.5)]	2	P55060 [76-89]	1	1945.93	3	649.317	3.37
LHIVQVVCK	1xcp2acid [C8(99.9)]	5	O00299 [184-192]	0	1353.77	3	451.928	3.44
IGPALSCGNTVVVKPAEQTPLTALHVASLIK	1xcp2acid [S/C/L/G/N/I/P/A/T/V/K/E/Q/H]	5	P00352 [180-210]	0	3442.91	4	861.485	8.71
LHIVQVVCKK	1xcp2acid [V/C/K/L/H/I/Q]	3	O00299 [184-193]	1	1481.87	3	494.626	2.97
LVCSGLLQASK	1xcp2acid [C3(100)]	3	Q9UHG3 [256-266]	0	1433.78	2	717.396	2.1
LTVVDTPGYGDAINCR	1xcp2acid [C15(99.4)]	2	Q15019 [97-112]	0	2008.98	2	1004.99	3.6
LTSENCEHFVNELR	1xcp2acid [C6(99.5)]	4	P53816 [108-121]	0	2005.94	3	669.32	3.48
LTGIKHELQANCYEEVKDR	1xcp2acid [N/C/L/T/G/I/K/H/E/Q/A/Y/V/D/R]	1	P23528 [128-146]	2	2561.28	4	641.078	5.31
LTFSCLGGSDNFK	1xcp2acid [C5(99.5)]	2	Q15185 [36-48]	0	1703.81	2	852.406	2.94
LTESPCALVASQYGWSGNMER	1xcp2acid [L/T/E/S/P/C/A/V/Q/Y/G/W/N/M/R]	1	P14625 [640-660]	0	2614.21	3	872.068	3.61
LHYCVSCAIHSK	1xcp2acid [C4(99.8)]; 1xCarbamidomethyl [C7(100)]	4	P62854 [71-82]	0	1732.83	3	578.281	4.04
ILACDDLDEAAR	1xcp2acid [C4(99)]	1	Q9P2R7 [427-438]	0	1619.77	2	810.39	1.98
LVILANNCPALRK	1xcp2acid [C8(99.3)]	5	P62888 [45-57]	1	1740	3	580.671	3.07
IGLIQFCLSAPK	1xcp2acid [C7(99.7)]	3	P50991 [246-257]	0	1604.89	2	802.945	3.75
MACARPLISVYSEKGESSGK	1xMet-loss+Acetyl [N-Term]; 1xcp2acid [M/A/C/R/P/L/I/S/V/Y/E/K/G]	2	P36578 [1-20]	1	2339.17	3	780.396	6.83
IEYNDQNDGSCDVK	1xcp2acid [S/C/G/D/I/E/Y/N/Q/V/K]	1	O75369 [594-607]	0	1914.82	2	957.911	3.29
MACARPLISVYSEK	1xMet-loss+Acetyl [N-Term]; 1xcp2acid [C/A/M/R/P/L/I/S/V/Y/E/K]	3	P36578 [1-14]	0	1793.93	2	897.462	3.5
MAASCVLLHTGQK	1xMet-loss+Acetyl [N-Term]; 1xcp2acid [C5(99.8)]	3	P14550 [1-13]	0	1584.82	2	792.917	2.99
MAANATTNPSQLLPLELVDKCIGSR	1xMet-loss+Acetyl [N-Term]; 1xcp2acid [C21(99)]	1	Q9Y4Y9 [1-25]	1	2868.49	2	1434.74	4.17
LYVYNTDTDNCR	1xcp2acid [C11(99.8)]	3	Q9H8Y8 [163-174]	0	1791.8	2	896.404	3.14
IGNCPFSQR	1xcp2acid [C4(100)]	6	O00299 [21-29]	0	1336.65	2	668.827	2.91
LYSNAYLNDLAGCIK	1xcp2acid [G/C/A/I/L/Y/S/N/D/K]	8	P00352 [114-128]	0	1972.98	2	986.995	4.33
LFQECCPHSTDR	1xcp2acid [C5(99.8)]; 1xCarbamidomethyl [C6(99.8)]	5	P61978 [180-191]	0	1807.79	3	603.268	3.26
LVVPASQCGSLIGK	1xcp2acid [C8(99.4)]	4	Q15366 [102-115]	0	1686.92	2	843.966	3.19
IVSLPECFNSPYGAK	1xcp2acid [C7(99.5)]	2	Q9NQR4 [38-52]	0	1939.96	2	970.488	3.1
LVQAFQFTDKHGEVCPAGWKPGSDTIKPDVQK	1xcp2acid [G/E/V/C/F/Q/T/D/K/H/P/A/W/L/S/I]	1	Q06830 [159-190]	1	3841.94	5	769.195	4.3
LVIVGDGACGK	1xcp2acid [C9(99.6)]	6	P61586 [8-18]	0	1346.71	2	673.86	2.69
IGLAVCYDMR	1xcp2acid [C6(99.8)]	7	Q86X76 [198-207]	0	1455.71	2	728.359	3.25
IYHPNINSNGSICLDILR	1xcp2acid [C13(99.7)]	2	P51668 [73-90]	0	2357.21	3	786.408	3.92
MACPLEKALDVMVSTFHK	1xMet-loss+Acetyl [N-Term]; 1xcp2acid [M/A/C/P/L/E/K/D/V/S/T/F/H]	1	P26447 [1-18]	1	2246.13	2	1123.57	4.85
LTDCVVMRDPASKR	1xcp2acid [C4(99.7)]	2	P22626 [47-60]	2	1905.97	3	635.993	2.84
LICCDILDVLDK	1xcp2acid [C4(99.8)]; 1xCarbamidomethyl [C3(100)]	1	P62258 [95-106]	0	1734.88	2	867.939	3.27
IIQLLDDYPKCFIVGADNVGSK	1xcp2acid [C11(99.4)]	3	P05388 [17-38]	1	2723.41	3	908.477	5.15
LQAFSAAIESCNK	1xcp2acid [S/C/E/N/L/Q/A/F/I/K]	4	Q02790 [332-344]	0	1696.84	2	848.923	3.62
ILRPGGCLFLKEPVETAVDNNSK	1xcp2acid [P/G/C/I/L/R/F/K/E/V/T/A/D/N/S]	5	Q6FI81 [86-108]	1	2815.48	4	704.628	6.52
IPGGIIEDSCVLR	1xcp2acid [S/C/V/D/L/I/P/G/E/R]	2	P49368 [204-216]	0	1686.89	2	843.954	3.1
LPCYFENLLSHFLPQKAPDGK	1xcp2acid [L/P/C/Y/F/E/N/S/H/Q/K/A/D/G]	1	Q9HBL8 [152-172]	1	2732.39	4	683.854	6.58
IISNASCTTNCLAPLAK	1xcp2acid [C7(99.8)]; 1xCarbamidomethyl [C11(100)]	15	P04406 [146-162]	0	2092.06	2	1046.53	4.65
IQEYCYDNIHFMK	1xcp2acid [Y4(99.7)]	5	Q7L1Q6 [345-357]	0	2018.91	3	673.643	2.52
IISNASCTTNCLAPLAK	1xcp2acid [T/N/S/I/A/C/L/P/K]; 2xCarbamidomethyl [C7(100); C11(100)]	16	P04406 [146-162]	0	2149.08	2	1075.04	2.67
INTESSLWSLEPGKCVLVNLSK	1xcp2acid [C/V/P/G/K/L/I/N/T/E/S/W]	1	Q8IVD9 [246-267]	1	2732.43	3	911.479	3.75
LLTSQCGAAEEEFVQR	1xcp2acid [S/Q/C/T/L/G/A/E/F/V/R]	1	P82933 [228-243]	0	2096.01	3	699.341	2.88
LNNLVLFDKATYDKLCK	1xcp2acid [L/C/K/N/V/F/D/A/T/Y]	1	P62851 [44-60]	2	2313.23	4	579.062	2.5
LLVGNKCDLTTK	1xcp2acid [C7(99.6)]	4	P62820 [120-131]	1	1619.88	3	540.632	3.17
LNISFPATGCQK	1xcp2acid [G/C/T/L/N/I/S/F/P/A/Q/K]	5	P62753 [3-14]	0	1593.81	2	797.408	3.2
INISEGNCPER	1xcp2acid [C8(99.4)]	3	Q15366 [47-57]; Q15365 [47-57]	0	1546.73	2	773.871	2.86
IISNASCTTNCLAPLAK	2xcp2acid [C7(99.7); C11(99.8)]	2	P04406 [146-162]	0	2350.19	2	1175.6	3.71
LIASYCNVGDIEGASK	1xcp2acid [Y/C/N/L/I/A/S/V/G/D/E/K]	2	P42704 [203-218]	0	1954.96	2	977.982	3.04
LQFHDVAGDIFHQQCK	1xcp2acid [Q/C/H/K/L/F/D/V/A/G/I]	7	P11413 [371-386]	0	2201.06	4	551.02	6.94
ILLNACCPGWVR	1xcp2acid [C/P/I/L/N/A/G/W/V/R]; 1xCarbamidomethyl [C]	5	P16152 [221-232]	0	1716.87	2	858.937	3.01
LICCDILDVLDKHLIPAANTGESK	1xCarbamidomethyl [C3]; 1xcp2acid [C4]	2	P62258 [95-118]	1	2953.52	4	739.133	6.48
LLCGGGIAADR	1xcp2acid [C3(100)]	2	P05091 [384-394]	0	1360.7	2	680.855	2.18
ISSPTETERCIESLIAVFQK	1xcp2acid [C10(99.8)]	1	P31949 [4-23]	1	2566.32	2	1283.67	5.15
LSQECPIKEVVLYVK	1xcp2acid [Q/E/C/S/P/I/L/K/V/Y]	7	Q9Y6E2 [266-280]	1	2063.12	3	688.38	3.08
ISPFEHQTYCQR	1xcp2acid [C/Q/Y/R/I/S/P/F/E/H/T]	1	P27361 [73-84]	0	1823.85	3	608.621	3.73
ISLGLPVGAVINCADNTGAK	1xcp2acid [C13(99.2)]	3	P62829 [16-35]	0	2228.17	3	743.398	4.33
IIPGFMCQGGDFTR	1xcp2acid [C7(99.6)]	8	P62937 [56-69]	0	1856.88	2	928.944	2.62
LSLDGQNIYNACCTLR	1xcp2acid [C12(99.6)]; 1xCarbamidomethyl [C13(99.8)]	2	P26599 [239-254]	0	2156.03	2	1078.52	3.81
LRACGLNFADLMAR	1xcp2acid [A/C/L/R/G/N/F/D/M]	1	Q99536 [83-96]	1	1865.95	3	622.655	3.25
ILHCLGLAEEIQK	1xcp2acid [C4(99.8)]	3	P53004 [278-290]	0	1781.96	3	594.658	4.23
LQSGICHLFR	1xcp2acid [I/C/G/L/Q/S/H/F/R]	2	P14868 [198-207]	0	1488.78	3	496.93	2.3
IQLEHHISPGDFPDCQK	1xcp2acid [D/C/Q/P/K/I/L/E/H/S/G/F]	2	Q9NZN4 [342-358]	0	2279.09	3	760.365	5.75
IQHSITAQDHQPTPDSCIISMVVGQLK	1xCarbamidomethyl [C17]; 1xcp2acid [I18]	1	P61970 [64-90]	0	3318.66	4	830.422	3.31
IQHSITAQDHQPTPDSCIISMVVGQLK	1xcp2acid [P14(99.1)]	2	P61970 [64-90]	0	3261.64	4	816.173	4.48
LSAPGCWAACTNFSR	1xcp2acid [C6(99.6)]; 1xCarbamidomethyl [C10(100)]	3	Q04941 [7-21]	0	1955.89	2	978.445	3.32
KLVIVGDGACGK	1xcp2acid [A/C/G/K/L/V/I/D]	1	P61586 [7-18]	1	1474.81	3	492.273	3.24
IEGDMIVCAAYAHELPK	1xcp2acid [I1(96.7)]; 1xCarbamidomethyl [C8(100)]	3	P46777 [69-85]	0	2232.08	3	744.698	2.42
MACPLEKALDVMVSTFHKYSGK	1xMet-loss+Acetyl [N-Term]; 1xcp2acid [C3(99.5)]	1	P26447 [1-22]	2	2681.35	2	1341.18	4.33
KVFANPEDCVAFGKGENAK	1xcp2acid [C9(100)]	4	P10620 [42-60]	2	2339.15	3	780.388	8.21
KVFANPEDCVAFGKGENAK	1xcp2acid [V/F/A/N/P/E/D/K/C/G]; 1xCarbamidomethyl [C9(100)]	2	P10620 [42-60]	2	2396.17	3	799.395	3.48
KVLCLAVAVGHVK	1xcp2acid [V/L/K/C/A/G/H]; 1xCarbamidomethyl [C4(100)]	1	P62906 [161-173]	1	1708.99	3	570.334	2.86
KVIGIECSSISDYAVK	1xcp2acid [C7(99.5)]	1	Q99873 [113-128]	1	2027.05	3	676.356	2.69
KVMSQNFTNCHTK	1xcp2acid [N/C/T/H/K/V/M/S/Q/F]	1	Q13283 [64-76]	1	1852.88	3	618.302	2.68
KVVGCSCVVVK	1xcp2acid [C5(99.9)]; 1xCarbamidomethyl [C7(100)]	5	P25398 [102-112]	1	1492.8	2	746.903	3.77
NQSFCPTVNLDK	1xcp2acid [F/C/P/T/N/Q/S/V/L/D/K]	3	P46776 [66-77]	0	1680.81	2	840.906	2.25
KVVGCSCVVVKDYGK	1xcp2acid [G/S/C/V/K/D/Y]; 1xCarbamidomethyl [C]	2	P25398 [102-116]	2	1956.01	3	652.677	3.13
NPLCPLGQTVQSELFR	1xcp2acid [C4(100)]	1	Q9Y5R8 [112-127]	0	2117.08	2	1059.05	4.94
KYNPTWHCIVGR	1xcp2acid [C8(99.8)]	1	Q96FJ2 [49-60]	1	1788.9	3	596.972	4.69
IAICGAISTYNR	1xcp2acid [C4(99.8)]	5	Q14914 [236-247]	0	1596.82	2	798.915	2.8
LALFNPDVCWDRNNPEPWNK	1xcp2acid [V/C/L/A/F/N/P/D/W/R/E/K]	4	O00483 [36-55]	1	2743.31	3	915.106	3.98
IAILTCPFEPPKPK	1xcp2acid [C6(100)]	10	P48643 [248-261]	0	1869.03	3	623.682	3.04
NINDAWVCTNDMFR	1xcp2acid [C8(99.8)]	5	P61970 [107-120]	0	2013.89	2	1007.45	3.79
KYEDICPSTHNMDVPNIK	1xcp2acid [C6(99.6)]	2	Q9GZV4 [68-85]	1	2419.14	3	807.052	3.82
NIHESCMSQIGWNR	1xcp2acid [C6(99.7)]	3	P11413 [153-166]	0	1989.91	3	663.973	3.2
KVFANPEDCVAFGK	1xcp2acid [C9(100)]	9	P10620 [42-55]	1	1839.91	2	920.458	5.54
KVACIGAWHPAR	1xcp2acid [V/A/K/C/I/G/W/H/P/R]; 1xCarbamidomethyl [C4(100)]	2	P39023 [250-261]	1	1680.88	3	560.965	3.04
KIWCFGPDGTGPNILTDITK	1xcp2acid [C4(99.7)]	3	P13639 [648-667]	1	2491.27	3	831.098	6.58
QHCAYTIAK	1xcp2acid [C3(99.8)]	1	Q6YN16 [164-172]	0	1349.67	2	675.341	2.39
QGCDCECLGGGR	1xcp2acid [C7(99.5)]; 2xCarbamidomethyl [C3(100); C5(100)]	6	Q9NRX4 [67-78]	0	1626.65	2	813.826	3.56
QAHLCVLASNCDEPMYVK	1xcp2acid [C11(99.7)]; 1xCarbamidomethyl [C5(100)]	2	P25398 [46-63]	0	2393.11	3	798.372	5.82
QAFTDVATGSLGQGLGAACGMAYTGK	1xcp2acid [C19(98.6)]	1	P29401 [115-140]	0	2790.32	3	930.781	4.42
KPYCNAHYPK	1xcp2acid [C4(99.8)]	2	Q14847 [50-59]	0	1535.75	3	512.587	3.3
KVCGDSDKGFVVINQK	1xcp2acid [V/C/G/D/S/K/F/I/N/Q]	1	P40227 [280-295]	2	2052.06	3	684.69	3.85
QAFPNTNRWFLTCINQPQFR	1xcp2acid [C13(99.3)]	4	P26641 [182-201]	1	2796.38	3	932.801	4.25
KTCTTVAFTQVNSEDKGALAK	1xcp2acid [C/T/K/V/A/F/Q/N/S/E/D/G/L]	1	P62424 [197-217]	2	2527.29	3	843.099	8.05
KTFTAWCNSHLR	1xcp2acid [C7(99.5)]	4	P12814 [35-46]; P35609 [42-53]; O43707 [54-65]	1	1778.88	3	593.63	3.53
NVASVCLQIGYPTVASVPHSIINGYKR	1xcp2acid [V/C/S/N/A/L/Q/I/G/Y/P/T/H/K/R]	2	P05388 [221-247]	1	3201.69	4	801.176	4.65
NVASVCLQIGYPTVASVPHSIINGYK	1xcp2acid [V5(99.1)]	3	P05388 [221-246]	0	3045.59	3	1015.87	4.81
NTGIICTIGPASR	1xcp2acid [C6(99.8)]	11	P14618 [44-56]	0	1617.84	2	809.426	3.81
KVACIGAWHPAR	1xcp2acid [C4(99.7)]	2	P39023 [250-261]	1	1623.86	3	541.956	4.02
KSEYTQPTPIQCQGVPVALSGR	1xcp2acid [C12(99.6)]	1	Q86XP3 [270-291]	1	2674.37	3	892.125	3.36
IEGDMIVCAAYAHELPK	1xcp2acid [C8(99.1)]	2	P46777 [69-85]	0	2175.06	3	725.694	2.19
LASHLNLAMCHLK	1xcp2acid [M/C/H/L/A/S/N/K]	2	Q02790 [319-331]	0	1765.92	3	589.313	2.72
IATGHNIIDELPPCK	1xcp2acid [P/C/K/I/A/T/G/H/N/D/E/L]	6	Q16563 [180-194]	0	1936	3	646.005	2.91
LCTSYSHSSTR	1xcp2acid [L/C/T/S/Y/H/R]	1	O95249 [33-43]	0	1556.72	3	519.578	1.67
LCVQNSPQEAR	1xcp2acid [C2(99.8)]	3	P33240 [149-159]	0	1559.76	2	780.385	3.03
MIPCDFLIPVQTQHPIRK	1xcp2acid [M/I/P/C/D/F/L/V/Q/T/H/R/K]	6	P06744 [401-418]	1	2451.3	4	613.582	1.95
LDDCGLTEAR	1xcp2acid [D/C/G/L/T/E/A/R]	1	P13489 [35-44]	0	1407.66	2	704.33	2.31
MININILSVCK	1xcp2acid [C10(99.3)]	2	Q53GQ0 [157-167]	0	1562.84	2	781.928	3.11
LDVGNFSWGSECCTR	1xcp2acid [C13(99.6)]; 1xCarbamidomethyl [C12(99.8)]	9	P62241 [60-74]	0	2045.88	2	1023.45	4.24
LCTSATESEVAR	1xcp2acid [C2(99.7)]	1	P31930 [379-390]	0	1581.76	2	791.382	2.55
LDVGNFSWGSECCTRK	1xcp2acid [C12(97.9)]; 1xCarbamidomethyl [C13(99)]	6	P62241 [60-75]	1	2173.98	3	725.33	3.06
LECGGGPWGNK	1xcp2acid [C3(99.6)]	12	P00352 [368-378]	0	1432.67	2	716.837	2.75
MDSKYQCVK	1xAcetyl [N-Term]; 1xcp2acid [C7(99.8)]	3	P52895 [1-9]	1	1458.68	2	729.842	2.45
MCDKEFMWALK	1xMet-loss+Acetyl [N-Term]; 1xcp2acid [C2(99.9)]	3	P58546 [1-11]	1	1627.76	2	814.383	4.19
MATKIDKEACR	1xMet-loss+Acetyl [N-Term]; 1xcp2acid [A/C/E/R/M/T/K/I/D]	1	Q14019 [1-11]	2	1491.76	3	497.927	2.98
MASGVQVADEVCR	1xMet-loss+Acetyl [N-Term]; 1xcp2acid [V/C/E/R/M/A/S/G/Q/D]	3	P60981 [1-13]	0	1590.76	2	795.885	3.57
IEEACEIYAR	1xcp2acid [C5(100)]	1	P54920 [38-47]	0	1511.72	2	756.366	2.76
MEEEIAALVIDNGSGMCK	1xMet-loss+Acetyl [N-Term]; 1xcp2acid [C17(99.5)]	1	P63261 [1-18]	0	2136	2	1068.5	3.95
NLDKEYLPIGGLAEFCK	1xcp2acid [C16(99.2)]	2	P00505 [91-107]	1	2225.13	3	742.383	3.76
MLPDKDCR	1xcp2acid [C7(99.8)]	13	P23528 [74-81]	1	1292.61	3	431.542	2.1
MRPGVACSVSQAQK	1xcp2acid [C7(100)]	3	P32969 [128-141]	0	1776.89	3	592.964	3.69
NIAFFSTNCVEGTAR	1xcp2acid [C9(99.6)]	2	P05023 [241-255]	0	1944.93	2	972.966	3.82
IAVYSCPFDGMITETK	1xcp2acid [C6(99.8)]	4	P50990 [239-254]	0	2090	2	1045.5	3.05
NCIVLIDSTPYR	1xcp2acid [N/C/I/V/L/D/S/T/P/Y/R]	6	P62241 [99-110]	0	1708.87	2	854.941	2.17
NCLTNFHGMDLTR	1xcp2acid [N1(99.7)]; 1xCarbamidomethyl [C2(100)]	1	P61247 [95-107]	0	1893.87	3	631.964	2.73
NCLTNFHGMDLTR	1xcp2acid [N/C/L/T/F/H/G/M/D/R]	6	P61247 [95-107]	0	1836.85	3	612.955	2.15
ICDQWDALGSLTHSR	1xcp2acid [I/C/D/Q/W/A/L/G/S/T/H/R]	5	O43707 [498-512]	0	2016.96	3	672.992	4.52
MMCGAPSATQPATAETQHIADQVR	1xAcetyl [N-Term]; 1xCarbamidomethyl [C3]; 1xcp2acid [M2]	2	P04080 [1-24]	0	2928.34	3	976.781	4.03
ICDQWDNLGALTQK	1xcp2acid [I/C/D/Q/W/N/L/G/A/T/K]	2	P12814 [479-492]	0	1919.93	2	960.469	3.22
NALANPLYCPDYR	1xcp2acid [C9(99.5)]	2	P22695 [184-196]	0	1824.87	2	912.943	3.4
NAFYIGSYQQCINEAQR	1xcp2acid [C11(99.3)]	2	O14579 [24-40]	0	2320.08	3	774.034	3.73
LCLAVKDYIR	1xcp2acid [L1(99.7)]	4	O00232 [192-201]	1	1508.83	3	503.615	2.01
NACIECSVNQNSIR	1xcp2acid [C/S/E/V/N/A/I/Q/R]; 1xCarbamidomethyl [C3(100)]	2	Q9UBB4 [90-103]	0	1922.88	2	961.942	2.94
ICLDILKDKWSPALQIR	1xcp2acid [C2(99.6)]	2	P61088 [86-102]	2	2327.29	3	776.437	3.43
MYGISLCQAILDETKGDYEK	1xcp2acid [Q8(98.1)]; 1xCarbamidomethyl [C7(100)]	7	P04083 [318-337]	1	2649.26	3	883.755	4.83
LCGDTSLNNMQR	1xcp2acid [L/C/G/D/T/S/N/M/Q/R]	2	O00410 [265-276]	0	1666.77	2	833.886	2.86
FTPPLEDSCFHYGFNSNYLK	1xcp2acid [D/S/C/F/E/H/T/P/L/Y/G/N/K]	3	P07099 [72-91]	0	2694.23	3	898.751	3.17
SSFYVNGLTLGGQKCSVIR	1xcp2acid [K/C/G/Q/S/V/F/Y/N/L/T/I/R]	1	P07737 [57-75]	1	2344.21	3	782.078	4.37
TFSSLGFSGTQECPELR	1xcp2acid [C13(99)]	1	Q6UW02 [397-413]	0	2174.02	2	1087.52	3.04
AVCMLSNTTAIAEAWAR	1xcp2acid [A/V/M/L/C/S/N/T/I/E/W/R]; 1xCarbamidomethyl [C3(100)]	3	Q71U36 [374-390]; P68363 [374-390]	0	2180.06	2	1090.53	2.18
AVCMLSNTTAIAEAWAR	1xcp2acid [C3(100)]	1	Q71U36 [374-390]; P68363 [374-390]	0	2123.04	2	1062.03	4.47
VPTANVSVVDLTCR	1xcp2acid [C13(99.7)]	15	P04406 [235-248]	0	1788.93	2	894.969	5.04
AVASQLDCNFLK	1xcp2acid [D7(99.5)]	3	P62333 [186-197]	0	1623.82	2	812.415	2.8
VPTANVSVVDLTCRLEKPAK	1xcp2acid [T/C/R/L/E/K/V/P/A/N/S/D]	4	P04406 [235-254]	1	2455.34	4	614.589	5.37
VQAHAAAALINFTEDCPK	1xcp2acid [D/C/E/P/V/Q/A/H/L/I/N/F/T/K]	3	O00410 [458-475]	0	2214.1	3	738.708	4.11
VSGGLEVLAEKCPNLTHLNLSGNK	1xcp2acid [K/C/E/P/N/L/V/S/G/A/T/H]	1	P39687 [76-99]	1	2808.47	4	702.876	3.37
ATIELCSTHANDASALR	1xcp2acid [L/C/E/A/T/I/S/H/N/D/R]	1	P55060 [190-206]	0	2088.02	3	696.677	2.96
VTDDLVCLVYK	1xcp2acid [C7(99.8)]	1	P49458 [42-52]	0	1582.82	2	791.912	2.47
ATGHSGGGCISQGR	1xcp2acid [C9(99.1)]	2	Q9HA64 [16-29]	0	1602.74	3	534.921	3.76
VTNRDIICQIAYAR	1xcp2acid [C8(100)]	4	P46777 [55-68]	1	1951.02	3	651.014	4.65
ATCIGNNSAAAVSMLK	1xcp2acid [C3(100)]	2	P25789 [161-176]	0	1865.92	2	933.463	3.59
ASVGFGGSCFQK	1xcp2acid [S/C/G/F/A/V/Q/K]	3	O60701 [268-279]	0	1502.71	2	751.858	3.08
ASFENNCEIGCFAK	1xcp2acid [C7(99.8)]; 1xCarbamidomethyl [C11(100)]	7	P56537 [5-18]	0	1904.83	2	952.916	2.82
VPFLVLECPNLK	1xcp2acid [C8(99.7)]	3	Q9NRP0 [7-18]	0	1686.93	2	843.962	4.09
ASEAHCHYVVVK	1xcp2acid [C6(99.5)]	3	Q15067 [526-537]	0	1657.82	3	553.276	3.42
ASCLYGQLPK	1xcp2acid [C3(100)]	8	P09211 [46-55]	0	1394.71	2	697.861	2.59
ASADLMSYCEEHAR	1xcp2acid [C9(97.1)]	1	Q9UBI6 [35-48]	0	1897.82	3	633.28	2.27
ARFEELCSDLFR	1xcp2acid [C7(100)]	6	P0DMV9 [300-311]	1	1800.87	3	600.963	2.74
VVVFIKPTCPYCR	1xcp2acid [T/C/P/V/F/I/K/Y/R]; 1xCarbamidomethyl [C12(100)]	3	P35754 [15-27]	0	1896.99	3	633.002	2.81
APVAGTCYQAEWDDYVPK	1xcp2acid [C7(99.4)]	3	P30086 [162-179]	0	2328.06	2	1164.54	3.36
WASGLTPAQNCPR	1xcp2acid [N/C/Q/P/W/A/S/G/L/T/R]	3	O15533 [105-117]	0	1715.83	2	858.418	3.15
WFLTCINQPQFR	1xcp2acid [C5(100)]	5	P26641 [190-201]	0	1867.93	2	934.472	3.3
WGLGGTCVNVGCIPK	1xcp2acid [G/C/V/I/W/L/T/N/P/K]; 1xCarbamidomethyl [C7(100)]	2	Q16881 [203-217]	0	1875.92	2	938.463	2.55
AIYDTPCIQAESEKWQQALK	1xcp2acid [P/C/I/A/Y/D/T/Q/E/S/K/W/L]	1	O00232 [249-268]	1	2637.3	3	879.776	3.33
ALVDGPCTQVR	1xcp2acid [C7(99.7)]	3	P50914 [36-46]	0	1473.75	2	737.379	2.54
ALTNLPHTDFTLCK	1xcp2acid [L/C/T/K/A/N/P/H/D/F]	3	Q9UBQ5 [73-86]	0	1888.96	3	630.326	2.77
AITIANQTNCPLYITK	1xcp2acid [N/C/A/I/T/Q/P/L/Y/K]	2	Q16555 [239-254]	0	2079.09	2	1040.05	4.12
AITIAGVPQSVTECVK	1xcp2acid [C/V/E/K/A/I/T/G/P/Q/S]	1	Q15365 [145-160]	0	1931.03	2	966.019	3.01
WLHEINQNCDDVCR	1xcp2acid [C9(99.8)]; 1xCarbamidomethyl [C13(100)]	1	Q15286 [102-115]	0	2116.93	3	706.317	3.52
VTVAGLAGKDPVQCSR	1xcp2acid [C14(99.5)]	4	Q99497 [33-48]	1	1916.01	3	639.339	5.59
ALSDHHIYLEGTLLKPNMVTPGHACTQK	1xCarbamidomethyl [C25]; 1xcp2acid [H/E]	6	P04075 [216-243]	0	3446.73	4	862.438	4.42
VPADTEVVCAPPTAYIDFAR	1xcp2acid [C/A/V/P/D/T/E/Y/I/F/R]	1	P60174 [34-53]	0	2450.21	3	817.413	2.92
VNQIGSVTESIQACK	1xcp2acid [C14(99.8)]	2	P13929 [344-358]	0	1891.96	2	946.483	4.64
DKAPGQLECETAIAALNSCLR	1xcp2acid [P/G/Q/L/E/C/D/K/A/T/I/N/S/R]; 1xCarbamidomethyl [C19(100)]	1	Q9Y490 [1653-1673]	1	2575.26	3	859.092	2.57
VGLGICYDMR	1xcp2acid [C6(99.8)]	12	Q9NQR4 [148-157]	0	1441.7	2	721.352	3.09
DFTPVCTTELGR	1xcp2acid [C6(99.6)]	1	P30041 [42-53]	0	1653.79	2	827.4	2.98
VGLTNYAAAYCTGLLLAR	1xcp2acid [C11(99.7)]	1	P46777 [90-107]	0	2185.15	3	729.05	5.24
VGTGEPCCDWVGDEGAGHFVK	1xcp2acid [P/C/V/G/T/E/D/W/A/H/F/K]; 1xCarbamidomethyl [C8(99.8)]	10	P52209 [164-184]	0	2535.11	3	845.707	5.48
VGTGEPCCDWVGDEGAGHFVK	1xcp2acid [E/P/G/V/T/C/D/W/A/H/F/K]; 2xCarbamidomethyl [C7(100); C8(100)]	3	P52209 [164-184]	0	2592.13	3	864.713	3.64
DCPLNAEAASSK	1xcp2acid [D1(99.7)]	3	Q10567 [865-876]	0	1520.7	2	760.854	2.22
VHACGVNPVETYIR	1xcp2acid [C4(100)]	1	Q08257 [42-55]	0	1872.94	2	936.978	3.44
DCGATWVVLGHSER	1xcp2acid [D/C/G/A/T/W/V/L/H/S/E/R]	2	P60174 [86-99]	0	1844.87	3	615.629	3.93
VLCLAVAVGHVK	1xcp2acid [C3(100)]	9	P62906 [162-173]	0	1523.88	2	762.446	3.02
CSEGPGLCLAR	1xcp2acid [C8(99.5)]; 1xCarbamidomethyl [C1(100)]	3	Q86X76 [285-295]	0	1477.69	2	739.351	1.9
CPFYAAEQDKGALEGSSCPFR	1xcp2acid [S/C/P/F/Y/A/E/Q/D/K/G/L/R]; 1xCarbamidomethyl [C1(100)]	1	P30519 [265-285]	1	2648.19	3	883.399	5.45
CLTQSGIAGGYKPFNLETCR	1xcp2acid [T/C/E/R/L/Q/S/G/I/A/Y/K/P/F/N]; 1xCarbamidomethyl [C1(100)]	1	P30626 [57-76]	0	2530.22	3	844.079	4.81
VLCLAVAVGHVK	1xcp2acid [V/L/C/A/G/H/K]; 1xCarbamidomethyl [C3(100)]	4	P62906 [162-173]	0	1580.9	3	527.637	1.86
VNQIGSVTESLQACK	1xcp2acid [A13(99.4)]; 1xCarbamidomethyl [C14(100)]	2	P13929 [344-358]; P06733 [344-358]	0	1948.98	2	974.996	2.97
CICSQLSLTTK	1xcp2acid [C3(100)]; 1xCarbamidomethyl [C1(100)]	4	Q12765 [186-196]	0	1568.78	2	784.896	2.41
CCSGAIIVLTK	1xcp2acid [C/S/G/A/I/V/L/T/K]; 1xCarbamidomethyl [C]	7	P14618 [423-433]	0	1479.77	2	740.389	3.36
VIGSGCNLDSAR	1xcp2acid [C6(99.6)]	3	P07195 [159-170]; P00338 [158-169]	0	1506.74	2	753.873	2.95
AYHEQLSVAEITNACFEPANQMVK	1xcp2acid [C15(99.7)]	1	Q71U36 [281-304]; P68363 [281-304]	0	3008.43	3	1003.48	5.5
VLTGVAGEDAECHAAK	1xcp2acid [E/C/A/H/V/L/T/G/D/K]	1	O95373 [725-740]	0	1885.91	3	629.307	4.87
VIVVGNPANTNCLTASK	1xcp2acid [C12(99.5)]	6	P40925 [126-142]	0	2016.06	3	672.693	4.08
AVYTQDCPLAAAK	1xcp2acid [C7(99.2)]	4	P49588 [665-677]	0	1665.83	2	833.422	3.36
AVYSTNCPVWEEAFR	1xcp2acid [C7(99.8)]	1	Q9BSJ8 [516-530]	0	2086.97	2	1043.99	2.9
AVSTGVQAGIPMPCFTTALSFYDGYRHEMLPASLIQAQR	1xCarbamidomethyl [C14]; 1xcp2acid [A18]	1	P52209 [409-447]	1	4599.26	5	920.657	3.04
AVSTGVQAGIPMPCFTTALSFYDGYR	1xCarbamidomethyl [C14]; 1xcp2acid [I10]	1	P52209 [409-434]	0	3124.49	3	1042.17	2.3
VMLGETNPADSKPGTIR	1xcp2acid [V/M/L/G/E/T/N/P/A/D/S/K/I/R]	1	P15531 [89-105]; P22392 [89-105]	0	2101.07	3	701.034	3.13
VNIEGGAIALGHPLGASGCR	1xcp2acid [S/G/C/A/R/V/N/I/E/L/H/P]	3	Q9BWD1 [342-361]	0	2207.14	3	736.384	5.01
TECYGYALGDATR	1xcp2acid [C3(100)]	1	P53041 [75-87]	0	1734.78	2	867.896	2.6
VNQAIWLLCTGAR	1xcp2acid [C9(99.3)]	4	P46782 [147-159]	0	1759.93	2	880.468	4.38
VNQIGSVTEAIQACK	1xcp2acid [C14(99.5)]	3	P09104 [344-358]	0	1875.96	2	938.485	3.48
VLDLELKGDIEKCLTAIVK	1xcp2acid [C13(98.8)]	1	P04083 [251-269]	2	2415.36	4	604.597	4.23
ALSDHHIYLEGTLLKPNMVTPGHACTQK	1xcp2acid [A/C/H/T/Q/L/S/D/I/Y/E/G/K/P/N/M/V]	4	P04075 [216-243]	0	3389.71	5	678.751	7.49
WVDPNSPVLLEDPVLCALAK	1xcp2acid [C16(99.8)]	1	P42330 [227-246]	0	2494.31	2	1247.66	5.99
WVPEITHHCPK	1xcp2acid [H/C/P/W/V/E/I/T/K]	5	P60953 [97-107]	0	1661.83	3	554.614	2.87
YKPVCNQVECHPYFNQR	1xcp2acid [P/V/C/N/Y/K/Q/E/H/F/R]; 1xCarbamidomethyl [C10(100)]	4	P52895 [184-200]	0	2497.15	3	833.055	4.74
YKPVCNQVECHPYFNQR	1xcp2acid [Y/K/P/V/C/N/Q/E/H/F/R]; 2xCarbamidomethyl [C5(100); C10(100)]	3	P52895 [184-200]	0	2554.18	3	852.061	3.14
YKPVCNQVECHPYFNR	1xcp2acid [C5(99.7)]; 1xCarbamidomethyl [C10(100)]	4	P42330 [184-199]	0	2369.1	3	790.37	4.96
YKPVCNQVECHPYFNR	1xcp2acid [Y/K/P/V/C/N/Q/E/H/F/R]; 2xCarbamidomethyl [C5(100); C10(100)]	4	P42330 [184-199]	0	2426.12	4	607.284	3.8
YKPVTNQVECHPYLTQEK	1xcp2acid [C10(99.8)]	6	O60218 [178-195]; C9JRZ8 [178-195]	0	2492.23	3	831.414	4.3
YKPVTNQVECHPYLTQEK	1xcp2acid [H11(99.3)]; 1xCarbamidomethyl [C10(100)]	7	O60218 [178-195]; C9JRZ8 [178-195]	0	2549.25	3	850.421	3.35
ADHQPLTEASYVNLPTIALCNTDSPLR	1xcp2acid [C20(99.5)]	4	P08865 [129-155]	0	3254.62	3	1085.54	8.72
ACYLSINPQKDETLETEK	1xcp2acid [A/C/Y/L/S/I/N/P/Q/K/D/E/T]	2	P61163 [221-238]	1	2397.16	3	799.73	3.76
YLAEVACGDDR	1xcp2acid [A/C/G/Y/L/E/V/D/R]	1	P27348 [128-138]	0	1526.69	2	763.851	3.07
YLAEVACGDDRK	1xcp2acid [C7(99.6)]	3	P27348 [128-139]	1	1654.79	3	552.266	3.46
YLLQYQEPIPCEQLVTALCDIK	1xcp2acid [P/C/E/Q/L/V/T/A/Y/I/D/K]; 1xCarbamidomethyl [C19(100)]	1	P25789 [97-118]	0	2952.49	2	1476.76	3.01
ACQSIYPLHDVFVR	1xcp2acid [A1(100)]; 1xCarbamidomethyl [C2(100)]	6	P61247 [200-213]	0	2020.01	3	674.009	4.7
ACQSIYPLHDVFVR	1xcp2acid [A1(99.8)]	4	P61247 [200-213]	0	1962.99	3	655.001	4.13
YNCTGLNFGK	1xcp2acid [C3(99.7)]	2	Q9Y320 [184-193]	0	1431.67	2	716.34	2.19
AEGSDVANAVLDGADCIMLSGETAKGDYPLEAVR	1xCarbamidomethyl [C16]; 1xcp2acid [L19]	1	P14618 [343-376]	1	3809.8	4	953.204	4.57
ACNVLQSSHLEDYPFNAEY	1xcp2acid [A/C/N/V/L/Q/S/H/E/D/Y/P/F]	6	O60218 [298-316]	0	2515.12	3	839.044	3.73
ACGLNFADLMAR	1xcp2acid [A/C/G/L/N/F/D/M/R]	5	Q99536 [85-96]	0	1596.77	2	798.885	3.07
YNPTWHCIVGR	1xcp2acid [C7(99.6)]	9	Q96FJ2 [50-60]	0	1660.81	3	554.273	1.98
ACANPAAGSVILLENLR	1xcp2acid [A/N/C/P/G/S/V/I/L/E/R]; 1xCarbamidomethyl [C2(100)]	1	P00558 [107-123]	0	2084.1	3	695.37	3.76
ACANPAAGSVILLENLR	1xcp2acid [A/C/N/P/G/S/V/I/L/E/R]	9	P00558 [107-123]	0	2027.07	2	1014.04	4.29
YNPTWHCIVGR	1xcp2acid [H6(99.7)]; 1xCarbamidomethyl [C7(100)]	4	Q96FJ2 [50-60]	0	1717.83	3	573.28	2.18
YQQGDFGYCPR	1xcp2acid [C9(99.2)]	2	P67870 [101-111]	0	1648.72	2	824.866	3.07
AAVPSIKFCLDNGAK	1xcp2acid [C9(99.5)]	3	P00558 [42-56]	1	1848.97	3	616.995	3.28
YRDCLTESNLIK	1xcp2acid [C4(99)]	2	P21980 [551-562]	1	1769.89	3	590.634	2.29
YSVFRPGVLLCDR	1xcp2acid [C/D/L/R/Y/S/V/F/P/G]	3	Q9BUP3 [162-174]	0	1839.96	3	613.99	2.76
YSYVCPDLVK	1xcp2acid [C5(99.5)]	1	P61158 [231-240]	0	1501.74	2	751.374	2.31
AAHLCAEAALR	1xcp2acid [C5(100)]	2	Q9UQ80 [145-155]	0	1440.74	3	480.917	2.98
AAGCDFTNVVK	1xcp2acid [C4(99.7)]	3	P52758 [68-78]	0	1439.7	2	720.354	2.22
YVDIAIPCNNK	1xcp2acid [P/C/N/Y/V/D/I/A/K]	5	P08865 [156-166]	0	1564.78	2	782.896	3.34
YVWLVYEQDRPLKCDEPILSNR	1xcp2acid [K/C/D/R/P/L/E/Y/V/W/Q/I/S/N]	2	P30086 [120-141]	1	3051.54	4	763.642	4.55
ACGLNFADLMAR	1xcp2acid [A1(100)]; 1xCarbamidomethyl [C2(100)]	1	Q99536 [85-96]	0	1653.79	2	827.399	2.42
AENGLLMTPCYTANFVAPEVLKR	1xcp2acid [P/C/L/T/Y/A/E/N/G/M/F/V/K/R]	1	P51812 [570-592]	1	2852.45	3	951.491	3.02
AESMLQQADKLGCR	1xcp2acid [C13(99.3)]	1	P13797 [337-350]	1	1864.9	3	622.31	2.93
YKPAVNQIECHPYLTQEK	1xcp2acid [E/C/Y/K/P/A/V/N/Q/I/H/L/T]	3	P15121 [178-195]	0	2476.23	4	619.815	6.52
YADLTEDQLPSCESLK	1xcp2acid [S/C/P/E/L/Y/A/D/T/Q/K]	1	P18669 [142-157]	0	2127	2	1064.01	4.19
YADLTEDQLPSCESLKDTIAR	1xcp2acid [C12(99.4)]	4	P18669 [142-162]	1	2683.29	3	895.101	5.67
ALLGYADNQCK	1xcp2acid [C10(99.2)]	2	Q9HC38 [188-198]	0	1510.74	2	755.87	2.39
YASICQQNGIVPIVEPEILPDGDHDLKR	1xcp2acid [I/C/Q/N/G/S/Y/A/V/P/E/L/D/H/K/R]	3	P04075 [174-201]	1	3434.74	4	859.443	5.42
YATDTFAGLCHQLTNALVER	1xcp2acid [G/L/C/Y/A/T/D/F/H/Q/N/V/E/R]	1	Q9UNS2 [95-114]	0	2538.24	3	846.752	4.65
ALEQKPDDAQYYCQR	1xcp2acid [C13(99.4)]	1	Q9Y2Z0 [37-51]	0	2142.99	3	715.004	2.9
YATSCYSCCPR	1xcp2acid [C9(99.6)]; 2xCarbamidomethyl [C5(100); C8(99.8)]	1	Q13057 [136-146]	0	1682.68	2	841.846	3.19
ALDVGSGSGILTACFAR	1xcp2acid [C/F/A/R/L/D/V/G/S/I/T]	1	P22061 [82-98]	0	1952.99	2	976.998	2.8
YCAGWADKIQGR	1xcp2acid [Y/C/A/G/W/D/K/I/Q/R]	3	P00352 [132-143]	1	1682.81	3	561.607	4.24
YCAGWADKIQGR	1xcp2acid [Y1(100)]; 1xCarbamidomethyl [C2(100)]	5	P00352 [132-143]	1	1739.83	3	580.616	2.61
AICTEAGLMALR	1xcp2acid [C3(99.5)]	1	P62191 [397-408]	0	1563.8	2	782.403	2.71
ALCDVGTAISCSR	1xcp2acid [C3(99.2)]; 1xCarbamidomethyl [C11(100)]	1	Q9BQB6 [41-53]	0	1667.79	2	834.399	2.17
ALANVNIGSLICNVGAGGPAPAAGAAPAGGPAPSTAAAPAEEK	1xcp2acid [C/N/V/G/S/L/I/A/P/T/E/K]	1	P05386 [50-92]	0	4067.07	4	1017.52	5.28
ALANSLACQGK	1xcp2acid [C8(99.6)]	5	P04075 [332-342]	0	1390.71	2	695.861	2.87
YCPNSVLVIIDVKPK	1xcp2acid [Y/C/P/N/S/V/L/I/D/K]	2	P51665 [115-129]	0	2003.1	3	668.373	2.44
AIANECQANFISIK	1xcp2acid [C6(99.8)]	5	P55072 [530-543]	0	1836.93	2	918.964	4.19
YDGSTIVPGEQGAEYQHFIQQCTDDVR	1xcp2acid [C/T/D/Q/Y/G/S/I/V/P/E/A/H/F/R]	3	Q14019 [31-57]	0	3371.53	3	1124.51	4.57
AFGGPGAGCISEGR	1xcp2acid [C9(99.5)]	3	Q9H479 [16-29]	0	1593.75	2	797.384	3.38
AFQYVETHGEVCPANWTPDSPTIKPSPAASK	1xcp2acid [C12(99.3)]	1	P30048 [218-248]	0	3643.75	4	911.697	5.02
AGAIAPCEVTVPAQNTGLGPEK	1xcp2acid [P/C/E/A/V/G/I/T/Q/N/L/K]	4	P05388 [113-134]	0	2438.24	3	813.419	4.04
AGAIAPCEVTVPAQNTGLGPEK	1xcp2acid [P/E/V/I/A/T/G/C/Q/N/L/K]; 1xCarbamidomethyl [C7(100)]	3	P05388 [113-134]	0	2495.26	3	832.429	3.3
AGCECLNESDEHGFDNCLR	1xcp2acid [A/G/C/E/L/N/S/D/H/F/R]; 2xCarbamidomethyl [C5(100); C17(100)]	3	O43396 [133-151]	0	2541.02	3	847.68	4.12
AGKPVICATQMLESMIK	1xcp2acid [C7(99.6)]	3	P14618 [320-336]	0	2135.11	3	712.374	5.01
VGEVCHITCKPEYAYGSAGSPPK	1xCarbamidomethyl [C]; 1xcp2acid [I/C]	2	Q02790 [99-121]	0	2765.31	4	692.084	2.24
YHTVNGHNCEVR	1xcp2acid [C9(99.7)]	5	P09651 [167-178]	0	1743.8	3	581.939	4.95
AGSDGESIGNCPFSQR	1xcp2acid [C11(99.8)]	5	Q9Y696 [25-40]	0	1939.86	2	970.435	4.94
AHEILPNLVCCSAK	1xcp2acid [C10(99.4)]; 1xCarbamidomethyl [C11(99.7)]	9	P50990 [139-152]	0	1869.93	3	623.983	3.79
YGIICMEDLIHEIYTVGKR	1xcp2acid [I/C/Y/G/M/E/D/L/H/T/V/K/R]	1	P18124 [182-200]	1	2568.3	4	642.83	6.57
ALAEEWSCPFMETSAK	1xcp2acid [S/C/W/P/F/A/L/E/M/T/K]	2	P61225 [133-148]	0	2114.96	2	1057.98	2.53
ALAGCDFLTISPK	1xcp2acid [C5(99.8)]	4	P37837 [246-258]	0	1650.86	2	825.931	3.69
YGIICMEDLIHEIYTVGK	1xcp2acid [M6(99)]; 1xCarbamidomethyl [C5(100)]	8	P18124 [182-199]	0	2469.22	3	823.748	4.29
YGIICMEDLIHEIYTVGKR	1xcp2acid [I/Y/G/C/M/E/D/L/H/T/V/K/R]; 1xCarbamidomethyl [C5(100)]	4	P18124 [182-200]	1	2625.32	3	875.78	3.9
DLKPSNLLINTTCDLK	1xcp2acid [T/C/D/L/K/P/S/N/I]	2	P27361 [166-181]	0	2103.12	3	701.711	2.85
LNCQVIGASVDSHFCHLAWVNTPK	1xCarbamidomethyl [C]; 1xcp2acid [C/H/F]	5	Q06830 [69-92]	0	3011.47	4	753.625	3.28
VFANPEDCVAFGKGENAKK	1xcp2acid [D/C/E/V/F/A/N/P/G/K]	2	P10620 [43-61]	2	2339.15	3	780.389	3.51
TILQCALNRPAFFAER	1xcp2acid [C5(99.4)]	3	P20073 [409-424]	0	2165.13	3	722.384	2.68
TIIPLISQCTPK	1xcp2acid [Q/C/S/T/I/P/L/K]	4	P40926 [204-215]	0	1628.91	2	814.963	2.77
TLGECGFTSQTARPQAPATVGLAFR	1xcp2acid [C5(99.4)]	2	Q15370 [56-80]	0	2894.46	3	965.495	3.72
FHEICSNLVK	1xcp2acid [C5(100)]	5	Q15041 [105-114]	0	1504.76	2	752.884	3.33
ELPPDQAEYCIAR	1xcp2acid [C/I/A/Y/R/E/L/P/D/Q]	2	P12814 [851-863]; O43707 [870-882]	0	1819.87	2	910.441	2.09
VAVVAGYGDVGKGCAQALR	1xcp2acid [C14(99.5)]	2	P23526 [215-233]	1	2149.12	3	717.047	4.9
VCALLSCTSHK	1xcp2acid [C7(99.6)]; 1xCarbamidomethyl [C2(100)]	8	P15121 [298-308]	0	1533.76	3	511.922	3.84
VCALLSCTSHK	1xcp2acid [V1(100)]; 2xCarbamidomethyl [C2(100); C7(100)]	2	P15121 [298-308]	0	1590.78	2	795.891	3
TICSHVQNMIK	1xcp2acid [C3(99.8)]	6	P32969 [72-82]	0	1588.8	2	794.904	3.06
TIAECLADELINAAK	1xcp2acid [C5(99.8)]	1	P46782 [168-182]	0	1889.97	2	945.488	4.09
ELANSPDCPQMCAYK	1xcp2acid [C8(99.6)]; 1xCarbamidomethyl [C12(100)]	1	P48739 [180-194]	0	2041.88	2	1021.45	3.23
TLIQNCGASTIR	1xcp2acid [C6(99.6)]	3	P49368 [450-461]	0	1591.83	2	796.417	2.71
FLGCVDIKDLPVSEQQER	1xcp2acid [C/V/G/D/F/L/I/K/P/S/E/Q/R]	2	Q9UNM6 [179-196]	1	2391.2	3	797.738	4.17
FIITALPTIYHCK	1xcp2acid [H/C/K/Y/F/I/T/A/L/P]	2	Q9H3N1 [95-107]	0	1834.99	3	612.336	2.44
TVVNISSLCALQPFK	1xcp2acid [C9(99.5)]	1	P35270 [151-165]	0	1935.04	2	968.027	3.32
FIPVKPCFYQNFSDEIPVEHQVLVK	1xcp2acid [P/V/F/I/K/C/Y/Q/N/S/D/E/H/L]	1	Q969E2 [14-38]	0	3291.69	4	823.677	3.98
VCALLSCTSHKDYPFHEEF	1xcp2acid [V1(100)]; 2xCarbamidomethyl [C2(100); C7(100)]	3	P15121 [298-316]	1	2655.2	3	885.737	5.03
EGVVECSFVK	1xcp2acid [C6(99.8)]	3	P40926 [270-279]	0	1411.69	2	706.348	2.76
EGPIDLGACNQDDWISAVRPVIEK	1xcp2acid [G/A/C/L/N/Q/E/P/I/D/W/S/V/R/K]	2	Q9Y5K5 [183-206]	0	2940.46	3	980.825	3.81
TGTSCALDCGAGIGR	1xcp2acid [C5(99.5)]; 1xCarbamidomethyl [C9(100)]	1	Q9BV86 [60-74]	0	1753.8	2	877.407	3.12
FMNSGQTCVAPDYILCDPSIQNQIVEK	1xCarbamidomethyl [C16]; 1xcp2acid [C/I/V]	5	P30838 [237-263]	0	3385.59	3	1129.2	6.62
VCEEIAIIPSK	1xcp2acid [C2(99.8)]	3	P08708 [34-44]	0	1516.81	2	758.908	3.28
FMNSGQTCVAPDYILCDPSIQNQIVEK	2xCarbamidomethyl [C8; C16]; 1xcp2acid [F/T]	6	P30838 [237-263]	0	3442.61	3	1148.21	6.44
VCEEIAIIPSKK	1xcp2acid [V/C/E/I/A/P/S/K]	12	P08708 [34-45]	1	1644.9	3	548.972	3.26
VCALLSCTSHKDYPFHEEF	1xcp2acid [V1(99.8)]; 1xCarbamidomethyl [C7(100)]	7	P15121 [298-316]	1	2598.18	3	866.729	5.82
EGAKLECGGGPWGNK	1xcp2acid [C7(100)]	7	P00352 [364-378]	1	1817.86	2	909.435	4.24
TIQFVDWCPTGFK	1xcp2acid [W/C/P/T/I/Q/F/V/D/G/K]	2	Q71U36 [340-352]; Q9BQE3 [340-352]	0	1856.9	2	928.956	3.16
VAVTEGCQPSR	1xcp2acid [C7(99.6)]	2	O75369 [1320-1330]	0	1461.72	2	731.362	2.03
TVPFCSTFAAFFTR	1xcp2acid [C5(99.7)]	2	P29401 [382-395]	0	1909.93	2	955.47	3.36
TYDATTHFETTCDDIK	1xcp2acid [T/C/D/Y/A/H/F/E/I/K]	2	P50395 [403-418]	0	2175.95	3	725.989	3.17
TSNKPLMIIHHLDECPHSQALKK	1xcp2acid [L/D/E/C/H/P/S/Q/A/K/T/N/M/I]	1	O95994 [67-89]	1	2955.53	5	591.911	3.22
FASGGCDNLIK	1xcp2acid [G/C/D/F/A/S/N/L/I/K]	3	P55735 [182-192]	0	1439.7	2	720.355	2.43
EVDWSQNTATFSPAISPTHPGEGLVLRPLCTADLNR	1xcp2acid [R/P/L/C/T/A/D/G/E/V/N/W/S/Q/F/I/H]	2	Q96EK6 [16-51]	0	4208.09	4	1052.78	5.78
TYGGCEGPDAMYVK	1xcp2acid [G/C/E/T/Y/P/D/A/M/V/K]	2	Q15369 [7-20]	0	1805.79	2	903.401	2.46
VAAAESMPLLLECAR	1xcp2acid [C/A/E/R/V/S/M/P/L]	2	O00410 [721-735]	0	1888.97	2	944.986	3.49
VAAQCSHAAVSAYK	1xcp2acid [C5(99.5)]	1	Q9Y3E5 [82-95]	0	1720.85	3	574.285	4.72
TSACGLFSVCYPR	1xcp2acid [C4(99.2)]; 1xCarbamidomethyl [C10(100)]	3	P30153 [145-157]	0	1775.82	2	888.415	3.49
ETVSEESNVLCLSK	1xcp2acid [C11(99.5)]	2	P13639 [581-594]	0	1852.9	2	926.956	3.14
FCDNSSAIQGK	1xcp2acid [C2(99.8)]	1	O15067 [269-279]	0	1484.68	2	742.846	2.58
FCSFSPCIEQVQR	1xcp2acid [C7(99.5)]; 1xCarbamidomethyl [C2(100)]	3	Q96FX7 [203-215]	0	1915.88	2	958.449	2.84
VAASCGAIQYIPTELDQVR	1xcp2acid [G/A/S/C/I/V/Q/Y/P/T/E/L/D/R]	1	Q7L2H7 [130-148]	0	2349.19	3	783.734	2.69
VAASCGAIQYIPTELDQVRK	1xcp2acid [V/A/S/G/I/C/Q/Y/P/T/E/L/D/R/K]; 1xCarbamidomethyl [C5(100)]	1	Q7L2H7 [130-149]	1	2534.31	3	845.441	3.21
VAASPEDIKLCR	1xcp2acid [C11(99.5)]	1	Q92552 [266-277]	1	1616.85	3	539.621	2.7
VACIGAWHPAR	1xcp2acid [C3(99.4)]	4	P39023 [251-261]	0	1495.76	3	499.257	2.22
TQSPCFGDDDPAKKEPR	1xcp2acid [P/C/S/F/T/Q/G/D/A/K/E/R]	2	Q12765 [320-336]	2	2206.02	4	552.26	2.6
VAHALAEGLGVIACIGEK	1xcp2acid [A/C/I/V/H/L/E/G/K]	2	P60174 [114-131]	0	2066.11	3	689.374	4.1
VAHSFNCTPIEGMLSHQLK	1xcp2acid [C7(99.1)]	5	Q9UQ80 [173-191]	0	2427.19	4	607.553	3.44
ELVSCSNCTDYQAR	1xcp2acid [C8(99.6)]; 1xCarbamidomethyl [C5(100)]	1	P49591 [391-404]	0	1960.85	2	980.933	3.64
TNHIGHTGYLNTVTVSPDGSLCASGGK	1xcp2acid [L/C/A/T/N/H/I/G/Y/V/S/P/D/K]	1	P63244 [186-212]	0	3001.45	4	751.118	5.56
VALNVSCANLLDKDIGSK	1xcp2acid [S/C/A/V/L/N/D/K/I/G]	2	O75131 [9-26]	1	2175.15	3	725.722	3.01
TIYAGNALCTVK	1xcp2acid [C9(99)]	1	P13804 [147-158]	0	1568.81	2	784.913	2.97
EIVHLQAGQCGNQIGAK	1xcp2acid [C10(100)]	3	P68371 [3-19]	0	2081.06	3	694.358	4.56
VAASCGAIQYIPTELDQVRK	1xcp2acid [S/C/A/G/V/I/Q/Y/P/T/E/L/D/R/K]	4	Q7L2H7 [130-149]	1	2477.29	3	826.431	4.84
EFHQAGKPIGLCCIAPVLAAK	1xcp2acid [C13(100)]; 1xCarbamidomethyl [C12(100)]	3	A0A0B4J2D5 [165-185]	0	2538.34	4	635.339	3.47
TGVHHYSGNNIELGTACGK	1xcp2acid [A/C/T/G/V/H/Y/S/N/I/E/L/K]	5	P62888 [69-87]	0	2273.08	3	758.36	5.09
VCEEIAIIPSKK	1xcp2acid [V1(100)]; 1xCarbamidomethyl [C2(100)]	7	P08708 [34-45]	1	1701.92	3	567.98	3.44
EAEHHCLLHSPIPVNCPIR	1xcp2acid [C16(99.7)]; 1xCarbamidomethyl [C6(100)]	1	Q9NUJ1 [224-242]	0	2537.25	4	635.07	3.25
FNNWGGSLSLGHPFGATGCR	1xcp2acid [G/A/T/C/F/R/N/W/S/L/H/P]	3	P55084 [417-436]	0	2393.12	3	798.38	4.77
FPVFNPATEEELCQVEEGDKEDVDK	1xcp2acid [C13(99.2)]	1	P00352 [38-62]	1	3182.45	3	1061.49	5.21
VCNPIITK	1xcp2acid [C2(99.9)]	3	P11142 [602-609]	0	1202.66	2	601.835	2.4
DVQIGDIVTVGECRPLSK	1xcp2acid [C13(99.4)]	6	P62280 [119-136]	0	2244.17	3	748.727	3.94
EEPWVDPNSPVLLEDPVLCALAK	1xcp2acid [C19(99.3)]	1	P52895 [224-246]	0	2849.44	2	1425.22	4.36
TGGTQTDLFTCGK	1xcp2acid [C11(99.5)]	1	Q15560 [251-263]	0	1643.77	2	822.392	3.35
TGCNVLLIQK	1xcp2acid [C3(99.8)]	1	P50991 [293-302]	0	1403.77	2	702.39	3.04
VCQGIGMVNR	1xcp2acid [C2(99.7)]	2	Q9Y3C6 [132-141]	0	1391.69	2	696.348	2.17
DVCTELLPLIKPQGR	1xcp2acid [C3(99.4)]	5	P16152 [120-134]	0	1997.09	3	666.367	2.63
VCTLAIIDPGDSDIIR	1xcp2acid [V/C/T/L/A/I/D/P/G/S/R]	1	P62888 [91-106]	0	2016.05	2	1008.52	3.53
VEDLTFTSPFCLQVK	1xcp2acid [C11(99.6)]	1	Q99873 [262-276]	0	2042.03	2	1021.52	4.15
VELCSFSGYK	1xcp2acid [C4(99.4)]	4	P83731 [3-12]	0	1447.69	2	724.351	2.47
FSGDLDDQTCR	1xcp2acid [C10(99.6)]	1	P05455 [236-246]	0	1571.68	2	786.344	2.74
DNPGVVTCLDEAR	1xcp2acid [C8(99.6)]	3	P22314 [227-239]	0	1703.81	2	852.406	2.81
DMIREVCGFAPYER	1xcp2acid [C7(99.3)]	1	Q9Y3U8 [42-55]	1	2000.94	3	667.651	2.41
DLTTAGAVTQCYR	1xcp2acid [C11(99.5)]	4	Q02543 [99-111]	0	1713.83	2	857.419	3.41
VFANPEDCVAFGK	1xcp2acid [C8(99.9)]	3	P10620 [43-55]	0	1711.81	2	856.412	3.56
DINAYNCEEPTEKLPFPIIDDR	1xcp2acid [N/C/Y/E/D/I/A/P/T/K/L/F/R]	1	P30041 [85-106]	1	2907.39	3	969.799	4.05
DINAYNCEEPTEK	1xcp2acid [N/C/Y/E/D/I/A/P/T/K]	2	P30041 [85-97]	0	1840.81	2	920.908	2.41
VFANPEDCVAFGKGENAK	1xcp2acid [C8(99.6)]	6	P10620 [43-60]	1	2211.05	3	737.69	4.45
TGQATVASGIPAGWMGLDCGPESSK	1xcp2acid [D/C/L/G/T/Q/A/V/S/I/P/W/M/E/K]	1	P00558 [298-322]	0	2735.28	3	912.435	3.66
EAESCDCLQGFQLTHSLGGGTGSGMGTLLLSK	1xCarbamidomethyl [C]; 1xcp2acid [C]	2		0	3569.67	3	1190.56	5.7
TVSYNGILGPECGTK	1xcp2acid [P/E/C/G/T/K/V/S/Y/N/I/L]	2	P21980 [513-527]	0	1853.91	2	927.46	2.35
VCENIPIVLCGNK	1xcp2acid [V1(100)]; 2xCarbamidomethyl [C2(100); C10(100)]	4	P62826 [111-123]	0	1830.92	2	915.965	3.4
TGQATVASGIPAGWMGLDCGPESSKK	1xcp2acid [C19(99.3)]	5	P00558 [298-323]	1	2863.38	3	955.13	6.26
VCENIPIVLCGNKVDIK	1xcp2acid [V/C/E/N/I/P/L/G/K/D]; 1xCarbamidomethyl [C10(100)]	6	P62826 [111-127]	1	2229.18	3	743.729	5.23
ECHLNADTVSSK	1xcp2acid [E/C/H/L/N/A/D/T/V/S/K]	1	P63010 [856-867]	0	1618.75	3	540.254	2.31
VCENIPIVLCGNKVDIKDR	1xcp2acid [C10(99.8)]; 1xCarbamidomethyl [C2(100)]	3	P62826 [111-129]	2	2500.31	4	625.837	4.54
VCENIPIVLCGNK	1xcp2acid [C10(99.4)]; 1xCarbamidomethyl [C2(100)]	14	P62826 [111-123]	0	1773.9	2	887.455	2.71
VCENIPIVLCGNKVDIK	1xcp2acid [V1(99.4)]; 2xCarbamidomethyl [C2(100); C10(100)]	2	P62826 [111-127]	1	2286.2	3	762.737	3.63
EAGDVCYADVYR	1xcp2acid [C6(99.5)]	1	Q07955 [143-154]	0	1675.74	2	838.376	2.82
VCNFLASQVPFPSR	1xcp2acid [V1(99.6)]	5	Q99714 [213-226]	0	1879.95	3	627.32	3.53
EALCGCTVNVPTLDGR	1xcp2acid [G/C/T/L/E/A/V/N/P/D/R]; 1xCarbamidomethyl [C]	1	P25685 [264-279]	0	2019.96	2	1010.49	2.63
TTANAIYCPPK	1xcp2acid [Y/C/I/P/T/A/N/K]	1	O00231 [195-205]	0	1493.75	2	747.376	1.8
LVQNCLWTLR	1xcp2acid [C5(99.8)]	1	P14923 [368-377]	0	1560.84	2	780.923	2.46
TGQATVASGIPAGWMGLDCGPESSKK	1xCarbamidomethyl [C19]; 1xcp2acid [S/L/G]	3	P00558 [298-323]	1	2920.4	4	730.853	3.46
TQTVCNFTDGALVQHQEWDGK	1xcp2acid [V/C/N/F/T/D/Q/G/A/L/H/E/W/K]	1	Q01469 [83-103]	0	2692.25	3	898.09	2.67
LVVPATQCGSLIGK	1xcp2acid [C/S/L/Q/G/I/V/P/A/T/K]	1	Q15365 [102-115]	0	1700.94	2	850.975	2.4
LWCTYHEK	1xcp2acid [C3(100)]	5	P15121 [79-86]	0	1394.66	2	697.832	1.81
YMACCLLYR	1xcp2acid [C5(99.7)]; 1xCarbamidomethyl [C4(99.9)]	9	Q71U36 [312-320]; P68363 [312-320]; Q9BQE3 [312-320]	0	1507.69	2	754.349	2.58
LWNTLGVCK	1xcp2acid [C8(99.3)]	2	P63244 [131-139]	0	1348.71	2	674.861	2.08
TDFQQGCAK	1xcp2acid [G/C/A/Q/K/T/D/F]	1	O95571 [164-172]	0	1312.6	2	656.802	2.01
YTVYCSLIK	1xcp2acid [C5(99.6)]	2	Q7L2H7 [121-129]	0	1404.72	2	702.866	2.25
LYCPVEFSK	1xcp2acid [C3(100)]	3	P52788 [335-343]	0	1400.69	2	700.85	1.69
YCFPNYVGRPK	1xcp2acid [Y1(99.5)]; 1xCarbamidomethyl [C2(100)]	1	P61163 [33-43]	0	1715.84	3	572.616	2.21
YVECSALTQK	1xcp2acid [C4(99.8)]	2	P60953 [154-163]	0	1456.71	2	728.863	2.16
TDTVLILCR	1xcp2acid [C8(99.6)]	1	Q9HB71 [147-155]	0	1348.73	2	674.868	2.5
SQETECTYFSTPLLLGKK	1xcp2acid [T/E/C/S/Q/Y/F/P/L/G/K]	1	P40926 [280-297]	1	2360.18	3	787.401	3.09
LNKCGVISPR	1xcp2acid [C/G/K/V/L/N/I/S/P/R]	3	P62244 [69-78]	1	1401.77	3	467.927	2.71
YCTDTGVLFR	1xcp2acid [C2(99.4)]	1	P12955 [57-66]	0	1489.71	2	745.363	1.91
YWLCAATGPSIK	1xcp2acid [C4(99.3)]	2	P63244 [246-257]	0	1624.82	2	812.913	2.15
ISEECIAQWK	1xcp2acid [C5(99.8)]	2	P54577 [497-506]	0	1521.74	2	761.377	2.56
TGSICWAAK	1xcp2acid [C5(99.6)]	2	P46977 [189-197]	0	1251.62	2	626.313	2.34
YWLEEAECR	1xcp2acid [C8(99.6)]	1	P55884 [295-303]	0	1513.68	2	757.342	1.83
YLVLDCVPEER	1xcp2acid [C6(99.4)]	3	O14776 [1057-1067]	0	1650.82	2	825.912	2.55
TFTAWCNSHLR	1xcp2acid [C6(99.7)]	2	P12814 [36-46]; P35609 [43-53]; O43707 [55-65]	0	1650.78	3	550.932	2.16
TICSHVQNMIK	1xcp2acid [T/I/S/C/H/V/Q/N/M/K]; 1xCarbamidomethyl [C3(100)]	4	P32969 [72-82]	0	1645.82	2	823.418	2.32
YLECSALTQR	1xcp2acid [C4(99.8)]	4	P63000 [154-163]	0	1498.74	2	749.87	2.31
YTQSNSVCYAK	1xcp2acid [V/C/S/Y/A/T/Q/N/K]	1	P31939 [427-437]	0	1578.73	2	789.869	2.24
TKFENLCK	1xcp2acid [C7(99.8)]	1	P07900 [566-573]	1	1297.66	2	649.337	2.33
TCQALAAR	1xcp2acid [C2(99.8)]	3	Q96FX7 [216-223]	0	1148.59	2	574.797	2.03
ITFDDYIACCVK	1xcp2acid [V/C/K/I/T/F/D/Y/A]; 1xCarbamidomethyl [C9(99.8)]	2	P30626 [154-165]	0	1762.82	2	881.918	2.08
TIDGQQTIIACIESHQFQPK	1xcp2acid [A/C/I/T/D/G/Q/E/S/H/F/P/K]	1	P52907 [147-166]	0	2572.29	3	858.1	2.29
YKPAVNQIECHPYLTQEK	1xcp2acid [Y/K/P/A/V/N/Q/I/E/C/H/L/T]; 1xCarbamidomethyl [C10(100)]	1	P15121 [178-195]	0	2533.25	3	845.091	2.08
LTTLPSDFCGLTHLVK	1xcp2acid [F/C/D/G/L/V/T/P/S/H/K]	3	Q96AG4 [51-66]	0	2060.09	3	687.365	2.91
LTTVCPTSKPQTQGLAK	1xcp2acid [V/C/L/T/P/S/K/Q/G/A]	2	P12931 [244-260]	0	2088.12	3	696.708	1.82
LQEVECEEQR	1xcp2acid [C/E/L/Q/V/R]	1	Q13596 [313-322]	0	1577.73	2	789.367	2.61
STCIYGGAPK	1xcp2acid [C3(99.3)]	2	Q92841 [275-284]; P17844 [198-207]	0	1311.64	2	656.32	2.05
IQCFCFEEQR	1xcp2acid [C5(99.6)]; 1xCarbamidomethyl [C3(100)]	2	Q9Y6N1 [215-224]	0	1674.74	2	837.878	2.62
LQFIADHCPTLR	1xcp2acid [C8(99.6)]	2	Q13098 [60-71]	0	1728.89	3	576.969	2.54
LVEALCAEHQINLIK	1xcp2acid [L/C/A/V/E/H/Q/I/N/K]	1	P25398 [64-78]	0	2009.09	3	670.368	2.25
TQNLPNCQLISR	1xcp2acid [C7(99.6)]	1	P37268 [368-379]	0	1701.87	2	851.444	2.29
ISTLSCENK	1xcp2acid [S/C/L/E/I/T/N/K]	2	Q14116 [107-115]	0	1309.65	2	655.327	1.93
TCLLISYTTNK	1xcp2acid [T/C/L/I/S/Y/N/K]	1	P60953 [17-27]	0	1571.81	2	786.413	2.1
TCQFLSTFK	1xcp2acid [C2(99.8)]	1	P50453 [97-105]	0	1389.69	2	695.347	2.1
TCHSFIINEK	1xcp2acid [T/C/H/S/F/I/N/E/K]	1	Q99613 [751-760]	0	1506.74	3	502.918	1.6
IPGFQCLAK	1xcp2acid [C6(99)]	1	O75884 [34-42]	0	1291.69	2	646.348	1.77
ISQFLGICIQR	1xcp2acid [C8(99.5)]	1	P49406 [130-140]	0	1592.86	2	796.933	2.03
YHTVNGHNCEVR	1xcp2acid [G/H/N/Y/T/V/C/E/R]; 1xCarbamidomethyl [C9(100)]	3	P09651 [167-178]	0	1800.82	3	600.946	2.4
TAVSCLSQNDWK	1xcp2acid [C5(100)]	2	Q96GG9 [25-36]	0	1666.79	2	833.901	2.63
YNFFCQGTR	1xcp2acid [F/C/Q/Y/N/G/T/R]	1	Q9NYP7 [92-100]	0	1450.66	2	725.833	1.9
TPCGEGSK	1xcp2acid [C3(100)]	1	P60866 [68-75]	0	1093.5	2	547.252	2.12
TPEQCPSVVSLLSESYNPHVR	1xcp2acid [T/P/E/Q/S/V/C/L/Y/N/H/R]; 1xCarbamidomethyl [C5(100)]	1	Q99460 [629-649]	0	2714.32	3	905.449	2.74
IVLVDDRECPVRR	1xcp2acid [D/R/C/P/V/I/L/E]	1	O15067 [598-610]	2	1885.01	4	472.008	2.25
TQLAVCQQR	1xcp2acid [C6(99.7)]	3	Q02790 [391-399]	0	1361.7	2	681.353	2.89
YHTVNGHNCEVRK	1xcp2acid [N/C/E/H/V/Y/T/G/R/K]	2	P09651 [167-179]	1	1871.9	4	468.729	2.82
TLSPGDSFSTFDTPYCR	1xcp2acid [C16(99.3)]	1	Q9NQR4 [131-147]	0	2208.99	3	737.003	3.21
SKLLDFCK	1xcp2acid [C7(99.8)]	4	P42330 [200-207]	1	1268.67	2	634.839	2.56
YCAQDAFFQVK	1xcp2acid [Y/C/A/Q/D/F/V/K]	2	Q13011 [186-196]	0	1634.77	2	817.89	2.46
QGCDCECLGGGR	1xcp2acid [Q/G/D/C/E/L/R]; 3xCarbamidomethyl [C3(100); C5(100); C7(100)]	1	Q9NRX4 [67-78]	0	1683.67	2	842.337	2.28
VMSQNFTNCHTK	1xcp2acid [N/C/T/H/V/M/S/Q/F/K]	2	Q13283 [65-76]	0	1724.79	3	575.599	2.3
QFNYTHICAGASAFGK	1xcp2acid [C8(99.4)]	1	P13804 [102-117]	0	2029.96	3	677.326	1.75
SCGSSTPDEFPTDIPGTK	1xcp2acid [S/C/G/T/P/D/E/F/I/K]	2	P41091 [104-121]	0	2153.97	2	1077.49	2.84
VNLQMVYDSPLCR	1xcp2acid [P/L/C/S/R/V/N/Q/M/Y/D]	2	Q9Y285 [482-494]	0	1852.91	3	618.308	2.31
NVVACESIGR	1xcp2acid [C5(99.8)]	3	Q9H0U6 [121-130]	0	1362.68	2	681.844	2.54
NTNDANSCQIIIPQNQVNR	1xcp2acid [Q9(99)]	1	P50395 [310-328]	0	2457.19	3	819.736	3.23
NSLDCEIVSAK	1xcp2acid [C5(99.5)]	2	Q01518 [423-433]	0	1493.73	2	747.369	2.52
SCGLHVTSIK	1xcp2acid [S/C/G/L/H/V/T/I/K]	1	P17812 [29-38]	0	1359.71	2	680.357	1.62
VCEEIAIIPSK	1xcp2acid [V1(100)]; 1xCarbamidomethyl [C2(100)]	2	P08708 [34-44]	0	1573.83	2	787.417	2.83
VCDIAAELAR	1xcp2acid [C2(99.8)]	2	O00410 [109-118]	0	1375.7	2	688.354	2.79
VSFCPLSLWR	1xcp2acid [C4(99.8)]	1	O96005 [305-314]	0	1522.79	2	761.897	2.44
VSLEEIYSGCTK	1xcp2acid [T11(99.1)]	1	P25685 [170-181]	0	1643.8	2	822.402	2.69
SCNCLLLK	1xcp2acid [C4(100)]; 1xCarbamidomethyl [C2(100)]	12	P06733 [336-343]	0	1265.64	2	633.322	3.07
NQLKETTEAACR	1xcp2acid [A/C/R/N/Q/L/K/E/T]	2	Q9Y2Q3 [166-177]	1	1678.82	3	560.279	2.49
SCSPELQQK	1xcp2acid [S/C/P/E/L/Q/K]	3	P16152 [149-157]	0	1334.64	2	667.823	2.51
NPSAAFFCVAR	1xcp2acid [C8(99)]	1	O75223 [35-45]	0	1497.73	2	749.364	2.25
SDCKEFSSEAR	1xcp2acid [S/D/C/K/E/F/A/R]	1	Q12931 [259-269]	1	1573.7	3	525.236	2.01
NRVIGSGCNLDSAR	1xcp2acid [C8(99.7)]	2	P00338 [156-169]	1	1776.88	3	592.965	2.73
VTSLGKDWHRPCLK	1xcp2acid [R/P/W/H/C/L/V/T/S/G/K/D]	1	P50238 [17-30]	1	1955.03	4	489.513	2.35
QLGLVVCR	1xcp2acid [C7(99.7)]	2	Q9UK45 [70-77]	0	1202.67	2	601.839	1.43
SAVENCQDSWR	1xcp2acid [C/Q/S/A/V/E/N/D/W/R]	6	P52209 [397-407]	0	1609.71	2	805.356	3.23
RLDECEEAFQGTK	1xcp2acid [C5(99.7)]	2	P61289 [88-100]	1	1840.85	3	614.287	2.9
VGLGICYDMRFAELAQIYAQR	1xcp2acid [Y/D/M/R/F/A/E/L/I/V/G/C/Q]; 1xCarbamidomethyl [C6(100)]	7	Q9NQR4 [148-168]	1	2789.39	4	698.101	2.89
RALANSLACQGK	1xcp2acid [C9(99.4)]	2	P04075 [331-342]	1	1546.82	2	773.911	2.35
VETCGCAEGYAR	1xcp2acid [G/C/A/V/E/T/Y/R]; 1xCarbamidomethyl [C4(99.5)]	1	O14972 [216-227]	0	1630.7	2	815.85	2.66
RACYGVLR	1xcp2acid [C/Y/R/A/G/V/L]	4	P23396 [117-124]	1	1252.66	2	626.833	2.42
RTIQFVDWCPTGFK	1xcp2acid [C9(99.4)]	2	Q71U36 [339-352]; Q9BQE3 [339-352]	1	2013.01	3	671.673	2.39
VHCLNTLFSR	1xcp2acid [V/H/C/L/N/T/F/S/R]	5	P26196 [322-331]	0	1504.77	3	502.262	1.29
VHLTPYTVDSPICDFLELQR	1xcp2acid [C13(98.7)]	1	Q8N163 [226-245]	0	2661.34	3	887.777	3.37
QITSYGETCPGLEQYAIK	1xcp2acid [S/Y/G/E/T/C/Q/I/P/L/A/K]	1	P50990 [422-439]	0	2316.12	3	772.707	3.3
QVLIRPCSK	1xcp2acid [P/C/S/Q/V/L/I/R/K]	1	P62244 [24-32]	0	1358.76	2	679.884	2.58
SAFLCGVMK	1xcp2acid [C5(99.4)]	1	O60506 [92-100]	0	1270.63	2	635.817	1.91
SAFPCFDEPAFK	1xcp2acid [C5(99.4)]	1	Q9UIQ6 [301-312]	0	1673.77	2	837.386	1.94
VLGCNPGPMTLQGTNTYLVGTGPR	1xCarbamidomethyl [C4]; 1xcp2acid [G7]	1	Q53H82 [18-41]	0	2818.4	3	940.14	2.02
VIGIGCNLDSQR	1xcp2acid [C6(99.3)]	1	Q8IX04 [314-325]	0	1589.81	2	795.412	2.29
VLSLNFSECHTK	1xcp2acid [C9(99)]	3	Q9UN86 [65-76]	0	1692.84	3	564.952	1.63
QRQEVCQSYK	1xcp2acid [C6(99.4)]	2	P08133 [54-63]	1	1583.76	3	528.594	2.24
QMYCVFNRNEDACR	1xcp2acid [C4(99.6)]; 1xCarbamidomethyl [C13(100)]	3	O43760 [56-69]	1	2120.91	3	707.644	2.49
QMYCVFNR	1xcp2acid [C4(99.8)]	2	O43760 [56-63]	0	1375.63	2	688.32	2.13
VDCTANTNTCNK	1xcp2acid [T/C/N/V/D/A/K]; 1xCarbamidomethyl [C3(100)]	2	P30101 [83-94]	0	1655.72	2	828.365	2.46
YCFPNYVGRPK	1xcp2acid [Y/C/F/P/N/V/G/R/K]	3	P61163 [33-43]	0	1658.81	3	553.609	2.73
NNTQVLINCR	1xcp2acid [C9(99.6)]	1	P62316 [38-47]	0	1489.76	2	745.379	3.36
NLSGQPNFPCR	1xcp2acid [C10(99.5)]	3	Q9HD45 [419-429]	0	1547.74	2	774.372	2.8
WCSWSLSQAR	1xcp2acid [C2(99.8)]	6	P08195 [430-439]	0	1538.72	2	769.864	2.21
SHFEQWGTLTDCVVMRDPNTK	1xcp2acid [V/M/R/D/S/H/F/E/Q/W/G/T/L/C/P/N/K]; 1xCarbamidomethyl [C12(100)]	2	P09651 [32-52]	1	2836.32	4	709.835	2.76
SKFDNLYGCR	1xcp2acid [C9(99.6)]	2	P23526 [187-196]	1	1517.72	2	759.362	3.11
VGEGPGVCWLAPEQTAGK	1xcp2acid [C8(99.5)]	1	Q9H4A4 [144-161]	0	2114.04	2	1057.52	2.68
MSEQSICQAR	1xMet-loss+Acetyl [N-Term]; 1xcp2acid [C7(99.1)]	1	Q8N8S7 [1-10]	0	1378.64	2	689.826	2.25
VAGDCLDEK	1xcp2acid [C5(99.2)]	2	Q96AG4 [127-135]	0	1264.59	2	632.796	2.1
MRHLPYFCR	1xcp2acid [C8(99.4)]	2	Q969G6 [1-9]	1	1537.76	3	513.255	2.92
WKNHGCQR	1xcp2acid [C6(99.5)]	2	P21980 [264-271]	1	1343.64	3	448.551	2.56
NCAVSCAGEK	1xcp2acid [S/C/A/N/V/G/E/K]; 1xCarbamidomethyl [C2(100)]	3	Q15813 [136-145]	0	1353.59	2	677.299	2.61
MLSCAGADR	1xcp2acid [C4(100)]	1	Q96L21 [102-110]	0	1238.57	2	619.786	2.04
MIPCDFLIPVQTQHPIRK	1xcp2acid [M/I/P/D/F/L/C/V/Q/T/H/R/K]; 1xCarbamidomethyl [C4(100)]	2	P06744 [401-418]	1	2508.33	4	627.837	1.99
MIPCDFLIPVQTQHPIR	1xcp2acid [P/C/D/F/M/I/L/V/Q/T/H/R]	1	P06744 [401-417]	0	2323.21	3	775.075	2.34
MENSQLCK	1xAcetyl [N-Term]; 1xcp2acid [C7(99.6)]	2	Q13151 [1-8]	0	1309.59	2	655.299	2.7
YAGLSTCFR	1xcp2acid [C7(99.6)]	5	P49591 [294-302]	0	1332.64	2	666.825	2.69
SIHDALCVIR	1xcp2acid [C7(99.6)]	1	P50991 [404-413]	0	1441.76	3	481.258	1.48
YCAGWADK	1xcp2acid [C2(99.5)]	7	P00352 [132-139]	0	1228.55	2	614.778	1.84
SINNDTTYCIK	1xcp2acid [T7(99)]	1	Q53H82 [92-102]	0	1586.75	2	793.878	2.15
TYAICGAIR	1xcp2acid [C5(99.7)]	8	P63220 [52-60]	0	1282.66	2	641.835	2.22
VACAEEWQESR	1xcp2acid [C3(100)]	1	O75663 [85-95]	0	1622.73	2	811.868	2.96
NMSVHLSPCFR	1xcp2acid [C/F/P/R/N/M/S/V/H/L]	4	P62280 [108-118]	0	1605.77	3	535.927	2.22
NCDLDVACR	1xcp2acid [C8(99.7)]; 1xCarbamidomethyl [C2(100)]	12	P30838 [222-230]	0	1380.6	2	690.806	2.66
VYQGLYCVAIR	1xcp2acid [L/Y/C/G/V/Q/A/I/R]	1	Q15008 [182-192]	0	1599.84	2	800.424	2.27
SEGTYCCGPVPVR	1xcp2acid [C7(99.5)]; 1xCarbamidomethyl [C6(99.8)]	2	P21980 [365-377]	0	1739.79	2	870.397	2.59
VVACTSAFLLWDPTKVPPR	1xcp2acid [S/A/T/V/C/F/L/W/D/P/K/R]	3	P30043 [106-124]	1	2415.29	3	805.77	1.97
NIELICQENEGENDPVLQR	1xcp2acid [C/Q/E/I/N/L/G/D/P/V/R]	1	Q15691 [223-241]	0	2528.21	3	843.406	3.36
NIDPKPCTPR	1xcp2acid [C7(99.5)]	2	Q96EP5 [79-88]	0	1455.74	3	485.918	2.58
VVCDENGSK	1xcp2acid [C/D/E/V/N/G/S/K]	2	P11940 [130-138]	0	1265.58	2	633.294	2.01
VVGCSCVVVK	1xcp2acid [G/C/S/V/K]; 1xCarbamidomethyl [C6(99.7)]	1	P25398 [103-112]	0	1364.71	2	682.858	1.66
NLAVAMCSR	1xcp2acid [C7(99.5)]	2	Q5JS54 [49-57]	0	1279.63	2	640.318	2.56
VVLLGEGCVGK	1xcp2acid [G/C/E/V/L/K]	1	Q9UL25 [22-32]	0	1388.76	2	694.883	2.43
NCFASVFEK	1xcp2acid [C2(99.8)]	5	O15144 [119-127]	0	1359.64	2	680.324	2.55
NHDEESLECLCR	1xcp2acid [C9(99.7)]; 1xCarbamidomethyl [C11(100)]	3	Q04637 [926-937]	0	1819.77	3	607.263	2.93
NCSSFLIKR	1xcp2acid [N1(100)]; 1xCarbamidomethyl [C2(100)]	4	P46779 [12-20]	1	1439.75	3	480.586	1.82
NCSSFLIKR	1xcp2acid [C2(99.8)]	5	P46779 [12-20]	1	1382.72	2	691.868	2.59
NCSETQYESK	1xcp2acid [N1(100)]; 1xCarbamidomethyl [C2(100)]	1	P61981 [111-120]	0	1560.66	2	780.833	2.66
NCSETQYESK	1xcp2acid [N/C/S/E/T/Q/Y/K]	4	P61981 [111-120]	0	1503.64	2	752.323	2.57
NCNDFQYESK	1xcp2acid [N1(100)]; 1xCarbamidomethyl [C2(100)]	2	Q04917 [111-120]	0	1619.68	2	810.344	2.48
NCNDFQYESK	1xcp2acid [N/C/D/F/Q/Y/E/S/K]	2	Q04917 [111-120]	0	1562.66	2	781.834	2.42
NCMTDLLAK	1xcp2acid [C2(99.8)]	7	Q00765 [17-25]	0	1323.64	2	662.324	2.22
VWNLANCK	1xcp2acid [N/C/A/K/V/W/L]	3	P63244 [176-183]	0	1262.64	2	631.821	2.31
VVTQNICQYR	1xcp2acid [C7(99.5)]	2	Q8N163 [748-757]	0	1538.78	2	769.892	2.62
QAFTDVATGSLGQGLGAACGMAYTGK	1xCarbamidomethyl [C19]; 1xcp2acid [G20]	2	P29401 [115-140]	0	2847.34	3	949.786	2.55
AAAPAPEEEMDECEQALAAEPK	1xcp2acid [P/E/M/D/A/C/Q/L/K]; 1xCarbamidomethyl [C13(100)]	1	P26641 [254-275]	0	2672.19	3	891.401	2.16
GNGIVECLGPK	1xcp2acid [C7(99.4)]	1	Q9UBE0 [336-346]	0	1401.72	2	701.367	2.47
AFFPCFDTPAVK	1xcp2acid [C5(99)]	1	Q9H4A4 [177-188]	0	1657.81	2	829.414	1.91
KCLEELQKR	1xcp2acid [K/L/E/C/Q/R]; 1xCarbamidomethyl [C2(100)]	3	P49721 [162-170]	2	1518.81	3	506.94	2.42
ATYDKLCK	1xcp2acid [C7(99.7)]	3	P62851 [53-60]	1	1256.63	2	628.823	2.63
AEGSDVANAVLDGADCIMLSGETAK	1xCarbamidomethyl [C16]; 1xcp2acid [L/A/M]	3	P14618 [343-367]	0	2809.3	3	937.104	2.83
HRVIGSGCNLDSAR	1xcp2acid [N9(98.5)]; 1xCarbamidomethyl [C8(100)]	1	P07195 [157-170]	1	1856.92	3	619.643	2.6
HQADACHAYQIIHR	1xcp2acid [A5(98.8)]; 1xCarbamidomethyl [C6(100)]	1	Q99538 [45-58]	0	2034.97	4	509.497	2.56
LFQCLLHR	1xcp2acid [C4(99.7)]	9	P13010 [490-497]	0	1344.72	2	672.866	2.23
HIYFINCGDSR	1xcp2acid [N/C/G/D/H/I/Y/F/S/R]	4	O75688 [143-153]	0	1639.77	2	820.389	2.24
AEGSDVANAVLDGADCIMLSGETAK	1xcp2acid [G/A/D/C/I/E/S/V/N/L/M/T/K]	1	P14618 [343-367]	0	2752.28	2	1376.64	1.65
IGAFGYMECSAK	1xcp2acid [E8(99.3)]	1	P61586 [151-162]	0	1591.73	2	796.367	1.93
AVAHHTDCTFIR	1xcp2acid [C8(99.3)]	1	P62195 [202-213]	0	1685.82	3	562.609	2.77
IGCIITAR	1xcp2acid [C3(99.7)]	3	Q12904 [159-166]	0	1161.64	2	581.326	2.11
HGNEVCK	1xcp2acid [C6(100)]	2	P52594 [84-90]	0	1101.51	2	551.26	2.58
AVCLLTGASR	1xcp2acid [C3(99.4)]	2	P35270 [8-17]	0	1305.7	2	653.355	2.17
LGDVISIQPCPDVK	1xcp2acid [P/C/Q/D/L/G/V/I/S/K]	2	P55072 [96-109]	0	1798.94	2	899.969	3.39
ADTLTPEECQQFKK	1xcp2acid [E/C/Q/F/A/D/T/L/P/K]	1	Q16181 [196-209]	1	1952.94	3	651.651	2.33
LGEWVGLCK	1xcp2acid [C8(99.5)]	1	P25398 [85-93]	0	1319.68	2	660.341	2.47
GRVEDVVVSDECR	1xcp2acid [C12(99.8)]	1	Q96EK6 [117-129]	1	1777.85	3	593.292	2.31
AVLFCLSEDKK	1xcp2acid [F4(99.8)]	7	P23528 [35-45]	1	1567.82	2	784.411	2.64
ICGFLGRPLGK	1xcp2acid [I/C/G/F/L/R/P/K]	5	O00204 [224-234]	0	1475.82	3	492.611	1.85
AVLFCLSDDKR	1xcp2acid [F/C/D/A/V/L/S/K/R]	2	Q9Y281 [35-45]	1	1581.81	3	527.943	2.31
GVNTDSGSVCR	1xcp2acid [C10(99.8)]	2	P12955 [149-159]	0	1409.65	2	705.329	3.33
GVVTLLSDYEVCK	1xcp2acid [C12(99.4)]	1	Q9UKD2 [165-177]	0	1740.89	2	870.948	2.31
AFTCDDLFR	1xcp2acid [T3(99.4)]	2	P61599 [6-14]	0	1402.65	2	701.826	2.53
GYLGPEQLPDCLK	1xcp2acid [D/C/L/P/K/G/Y/E/Q]	2	P40926 [79-91]	0	1747.87	2	874.444	2.61
GYVSDIDCR	1xcp2acid [C8(99.5)]	2	P48506 [288-296]	0	1342.61	2	671.808	2.63
AVGIWHCGSCMK	1xcp2acid [S/C/G/M/A/V/I/W/H/K]; 1xCarbamidomethyl [C7(99.9)]	5	P61513 [51-62]	0	1663.75	2	832.377	2.47
HCSQVDSVR	1xcp2acid [C2(99.7)]	1	Q14247 [111-119]	0	1345.63	2	673.32	2.42
AVGDGIVLCK	1xcp2acid [C9(99.5)]	3	P13797 [159-168]	0	1289.69	2	645.354	2.63
LGGEVSCLVAGTK	1xcp2acid [S6(99.4)]	1	P13804 [47-59]	0	1548.81	2	774.91	2.8
HELQANCYEEVKDRCTLAEK	1xcp2acid [E/V/K/D/R/C/T/L/A/H/Q/N/Y]; 1xCarbamidomethyl [C7(100)]	1	P23528 [133-152]	2	2751.29	4	688.578	2.36
GYLGPEQLPDCLKGCDVVVIPAGVPR	1xcp2acid [P/D/C/L/K/G/V/Y/E/Q/I/A/R]	1	P40926 [79-104]	1	3010.55	3	1004.19	1.87
GQLCELSCSTDYR	1xcp2acid [C4(99.7)]; 1xCarbamidomethyl [C8(100)]	1	Q99873 [357-369]	0	1846.81	2	923.908	2.73
KCYEMASHLR	1xcp2acid [C2(98.8)]	4	P07737 [127-136]	1	1552.74	3	518.248	1.41
KKLVIVGDGACGK	1xcp2acid [A/C/G/K/L/V/I/D]	1	P61586 [6-18]	2	1602.9	3	534.971	2.42
ALELCEILAK	1xcp2acid [C5(99.3)]	1	P49354 [337-346]	0	1417.78	2	709.393	1.86
ICDDELILIK	1xcp2acid [C2(99.7)]	1	P17987 [356-365]	0	1489.8	2	745.402	2.19
ICAVGITK	1xcp2acid [C2(99.4)]	1	P55060 [841-848]	0	1119.62	2	560.313	1.49
ALDCSSSVR	1xcp2acid [C4(100)]	3	Q13330 [226-234]	0	1252.6	2	626.804	2.26
AILPCQDTPSVK	1xcp2acid [C5(99.5)]	5	P09960 [143-154]	0	1586.82	2	793.914	2.61
IAVAAQNCYK	1xcp2acid [N/C/Q/Y/I/A/V/K]	1	P60174 [60-69]	0	1395.71	2	698.362	2.99
ALLVTASQCQQPAENK	1xcp2acid [Q/C/S/P/A/L/V/T/E/N/K]	1	Q01518 [85-100]	0	2016.02	3	672.681	2.52
IAQLICER	1xcp2acid [C6(99.7)]	3	P33316 [217-224]	0	1260.68	2	630.843	2.43
ALDCSSSIR	1xcp2acid [C4(99.8)]	2	O94776 [206-214]	0	1266.61	2	633.81	2.01
ICPVEFNPNFVAR	1xcp2acid [I/C/P/V/E/F/N/A/R]	3	Q9UI30 [32-44]	0	1820.92	2	910.963	2.38
ICPVEFNPNFVAR	1xcp2acid [I1(100)]; 1xCarbamidomethyl [C2(100)]	1	Q9UI30 [32-44]	0	1877.94	2	939.473	2.26
IACLDFSLQK	1xcp2acid [C3(99.2)]	1	P17987 [234-243]	0	1452.76	2	726.877	2.29
ICSVDGIPAR	1xcp2acid [C2(99.6)]	2	P10301 [69-78]	0	1345.69	2	673.349	1.88
ICSWNVDGLR	1xcp2acid [C2(99.7)]	2	P27695 [64-73]	0	1477.73	2	739.366	2.03
ANSILFCGR	1xcp2acid [C/G/F/R/A/N/S/I/L]	1	P50453 [364-372]	0	1295.66	2	648.331	2.57
LCYVGYNIEQEQK	1xcp2acid [L/C/Y/V/G/N/I/E/Q/K]	1	P61160 [220-232]	0	1901.91	2	951.459	2.39
KTGCNVLLIQK	1xcp2acid [T/G/C/N/K/V/L/I/Q]	4	P50991 [292-302]	1	1531.87	3	511.294	2.6
EALNSCNKR	1xcp2acid [C6(99.3)]	3	P19338 [538-546]	1	1349.66	3	450.559	2.44
KIENLCAMGFDR	1xcp2acid [C6(99.7)]	1	P61086 [165-176]	1	1711.83	3	571.282	2.2
KIIVFSACR	1xcp2acid [A/C/S/R/K/I/V/F]	2	Q07960 [84-92]	1	1351.76	2	676.382	2.82
KLMEECKR	1xcp2acid [C6(99.7)]	1	Q9P0L0 [174-181]	2	1351.69	3	451.234	2.72
AKFENLCK	1xcp2acid [C7(99.9)]	5	P08238 [558-565]	1	1267.65	3	423.22	1.99
ALAGCDFLTISPK	1xcp2acid [A/D/L/G/F/C/T/I/S/P/K]; 1xCarbamidomethyl [C5(100)]	6	P37837 [246-258]	0	1707.88	2	854.442	2.39
KFPVFNPATEEELCQVEEGDK	3xcp2acid [E12; E17; E18]	1	P00352 [37-57]	1	3354.6	4	839.409	3.3
LECGGGPWGNK	1xcp2acid [L1(99.7)]; 1xCarbamidomethyl [C3(100)]	2	P00352 [368-378]	0	1489.69	2	745.349	2.1
KLSAECAK	1xcp2acid [C/A/K/L/S/E]	1	P14735 [899-906]	1	1164.61	2	582.808	2.29
AQCEDDLAEKR	1xcp2acid [C3(99)]	1	Q12797 [382-392]	1	1592.74	3	531.586	2.69
KNEPPLTCPYSLK	1xcp2acid [C8(99)]	2	Q9UGP8 [288-300]	1	1804.93	3	602.316	2.54
APQCLGK	1xcp2acid [C4(99.8)]	4	Q00839 [559-565]	0	1031.53	2	516.27	1.97
KNYCNIQVTK	1xcp2acid [C/N/Y/K/I/Q/V/T]	2	P48444 [476-485]	1	1525.78	3	509.264	2.49
KPVVDCVVSVPCFYTDAERR	1xcp2acid [P/C/F/Y/T/D/V/A/E/K/S/R]; 1xCarbamidomethyl [C6(100)]	1	P34932 [135-154]	1	2655.31	4	664.584	2.72
KLPHELCTLIR	1xcp2acid [L6(100)]	1	Q10713 [460-470]	1	1637.92	3	546.645	1.99
GNLYSFGCPEYGQLGHNSDGK	1xcp2acid [S/F/G/C/Y/N/L/P/E/Q/H/D/K]	1	Q9P258 [273-293]	0	2558.14	3	853.39	2.92
LGYILTCPSNLGTGLR	1xcp2acid [C7(99.4)]	1	P17540 [311-326]	0	1993.06	2	997.028	2.58
EKPVCGTTYK	1xcp2acid [C5(98.4)]	2	Q14444 [222-231]	0	1440.72	3	480.911	1.74
FSVCVLGDQQHCDEAK	1xcp2acid [H/C/Q/D/E/A/F/S/V/L/G/K]; 1xCarbamidomethyl [C4(100)]	1	P62906 [63-78]	0	2150.96	3	717.662	2.07
FSTIASSYEECR	1xcp2acid [C11(99.1)]	1	Q9NY33 [499-510]	0	1707.77	2	854.385	2.76
FSPNSSNPIIVSCGWDK	1xcp2acid [S/C/V/G/F/P/N/I/W/D/K]	1	P63244 [156-172]	0	2166.03	2	1083.51	2.53
FSAVALCK	1xcp2acid [C7(99.3)]	1	P09936 [214-221]	0	1153.61	2	577.307	2.1
EICCYSISCK	1xcp2acid [C9(99.3)]; 2xCarbamidomethyl [C3(100); C4(100)]	3	Q96BM9 [156-165]	0	1577.68	2	789.345	2.55
DVVICPDASLEDAKK	1xcp2acid [I/C/V/D/P/A/S/L/E/K]	1	Q99497 [49-63]	1	1917.96	3	639.992	1.84
AVLNPLCQVDYR	1xcp2acid [C7(99.6)]	1	Q15436 [68-79]	0	1705.87	2	853.445	2.42
CLCAIDIHNK	1xcp2acid [C3(100)]; 1xCarbamidomethyl [C1(100)]	1	Q9UKR5 [65-74]	0	1501.73	3	501.248	1.86
FMNSGQTCVAPDYILCDPSIQNQIVEK	1xCarbamidomethyl [C8]; 2xcp2acid [D12; C16]	1	P30838 [237-263]	0	3700.75	3	1234.26	2.33
FLTVLCSR	1xcp2acid [C6(99.8)]	6	P09525 [193-200]	0	1253.67	2	627.337	2.51
CTPACISFGPK	1xcp2acid [C5(99.4)]; 1xCarbamidomethyl [C1(100)]	1	P34932 [34-44]	0	1495.71	2	748.359	1.93
DCLINAAK	1xcp2acid [D/C/L/I/N/A/K]	4	P17987 [146-153]	0	1162.59	2	581.801	2.23
FICTTSAIQNR	1xcp2acid [C3(100)]	1	P53396 [18-28]	0	1568.79	2	784.9	2.37
FGEVVDCTLK	1xcp2acid [C7(99.3)]	4	Q99729 [92-101]; Q14103 [120-129]	0	1425.71	2	713.36	2.61
FEELCSDLFR	1xcp2acid [C5(99.8)]	3	P0DMV9 [302-311]	0	1573.74	2	787.374	3.01
FDTGNLCMVTGGANLGR	1xcp2acid [L/M/G/N/V/F/D/T/C/A/R]; 1xCarbamidomethyl [C7(100)]	2	P62701 [175-191]	0	2097.98	3	699.999	1.73
LIQYCHSK	1xcp2acid [C5(99.6)]	5	O60218 [196-203]; C9JRZ8 [196-203]	0	1306.66	3	436.226	1.7
AALEACHK	1xcp2acid [C6(99.8)]	1	P11766 [277-284]	0	1157.58	2	579.292	1.8
LLYEALVDCK	1xcp2acid [C9(99.3)]	2	Q7L2H7 [167-176]	0	1481.77	2	741.39	2.2
LLVGNKCDLTTKK	1xcp2acid [C7(99.1)]	2	P62820 [120-132]	2	1747.98	3	583.331	3.16
DGNASGTTLLEALDCILPPTRPTDKPLRLPLQDVYK	1xcp2acid [G/T/L/E/A/D/C/S/I/N/P/R/K/Q/V/Y]	2	P68104 [220-255]	1	4236.24	5	848.05	3.5
ENMAYTVECLR	1xcp2acid [C9(99.5)]	2	P22695 [117-127]	0	1643.76	2	822.379	2.56
IISNASCTTNCLAPLAK	1xCarbamidomethyl [C]; 2xcp2acid [I/C/T]	5	P04406 [146-162]	0	2407.21	3	803.078	2.61
AACLLDGVPVALKK	1xcp2acid [A/C/L/D/G/V/P/K]	1	Q8TDX7 [51-64]	1	1712.98	3	571.667	2.12
DIICQIAYAR	1xcp2acid [C4(99.8)]	4	P46777 [59-68]	0	1480.76	2	740.885	2.24
EVCGFAPYER	1xcp2acid [C3(99.4)]	3	Q9Y3U8 [46-55]	0	1485.68	2	743.345	1.82
DLSHIGDAVVISCAK	1xcp2acid [S/C/A/I/K/D/L/H/G/V]	1	P12004 [150-164]	0	1842.94	3	614.987	2.62
FVQCPDGELQK	1xcp2acid [C4(99.6)]	3	Q9Y230 [224-234]	0	1578.76	2	789.884	1.92
AATQCEFSK	1xcp2acid [C5(99.7)]	2	Q96GG9 [111-119]	0	1299.6	2	650.307	2.6
DPSKNDTCK	1xcp2acid [T/C/D/K/P/S/N]	1	O43169 [112-120]	1	1322.6	2	661.808	1.97
ACPRPEGLNFQDLK	1xcp2acid [A/C/P/R/E/G/L/N/F/Q/D/K]	5	P15927 [218-231]	0	1902.95	3	634.991	2.41
GLSNLFLSCPIPK	1xcp2acid [C9(99.2)]	1	Q9Y570 [304-316]	0	1703.92	2	852.469	3.57
EATDPRPCEVENAVESWR	1xcp2acid [P/R/D/C/E/A/T/V/N/S/W]	1	P47755 [104-121]	0	2403.1	3	801.707	2.57
GKITFCTGIR	1xcp2acid [C6(99.3)]	1	P55036 [82-91]	1	1410.76	3	470.922	1.97
LKSYCNDQSTGDIK	1xcp2acid [Y/C/S/N/L/K/D/Q/T/G/I]	3	P00492 [102-115]	1	1886.9	3	629.636	2.01
GKGSGCIEPASGR	1xcp2acid [G/S/C/K/I/E/P/A/R]	2	Q7Z7F0 [275-287]	1	1533.75	3	511.92	2.8
IKHACQLSQR	1xcp2acid [C5(99.7)]	1	Q6P996 [357-366]	1	1498.79	3	500.272	2.61
GKDCAVIVTQK	1xcp2acid [G/K/D/C/A/V/I/T/Q]; 1xCarbamidomethyl [C4(100)]	1	P60900 [44-54]	1	1533.81	3	511.942	2.88
GEVITTYCPANNEPIAR	1xcp2acid [C8(99.1)]	1	P49419 [63-79]	0	2163.05	2	1082.03	2.04
GEPGRPALYFCGSIR	1xcp2acid [F/C/G/E/P/R/A/L/Y/S/I]	1	O43598 [16-30]	0	1937.97	3	646.665	2.7
FVVSSLQGEDCR	1xcp2acid [C11(98.7)]	1	Q9GZQ3 [54-65]	0	1654.79	2	827.897	2.83
EGALCEENMR	1xcp2acid [C5(99.5)]	2	P13639 [689-698]	0	1466.64	2	733.822	2.62
GNEFEDYCLKR	1xcp2acid [C8(99.3)]	1	P26196 [95-105]	1	1688.77	3	563.594	1.88
LLACIASRPGQCGR	1xcp2acid [P/G/Q/C/R/L/A/I/S]; 1xCarbamidomethyl [C4(100)]	1	P62241 [171-184]	0	1816.93	3	606.318	2.95
GCLLYGPPGTGK	1xcp2acid [G/C/L/Y/P/T/K]	1	P62333 [169-180]	0	1477.75	2	739.381	2.2
GCGTVLLSGPR	1xcp2acid [G1(100)]; 1xCarbamidomethyl [C2(100)]	3	Q07020 [133-143]	0	1431.74	2	716.375	2.42
GCGTVLLSGPR	1xcp2acid [G/C/T/V/L/S/P/R]	6	Q07020 [133-143]	0	1374.72	2	687.866	2.19
IKGCWDSIHVVEVQEK	1xcp2acid [I/K/G/C/W/D/S/H/V/E/Q]	1	P47756 [144-159]	1	2185.11	4	547.032	2.24
GCEVVVSGK	1xcp2acid [G/C/E/V/S/K]	11	P23396 [133-141]	0	1192.6	2	596.807	2.42
LLCGLLAER	1xcp2acid [C3(100)]	8	P14174 [79-87]	0	1302.72	2	651.867	1.84
GAVECCPNCR	1xcp2acid [C5(99.7)]; 2xCarbamidomethyl [C6(99.7); C9(100)]	1	P31689 [145-154]	0	1480.61	2	740.809	2.19
GANQCVQAAR	1xcp2acid [C5(99)]	1	Q9H477 [55-64]	0	1332.65	2	666.829	1.71
CCLTYCFNKPEDK	1xcp2acid [Y/C/F/L/T/N/K/P/E/D]; 2xCarbamidomethyl [C1(100); C2(100)]	1	P62979 [144-156]	0	1992.87	3	664.958	2.44
ILYSQCGDVMR	1xcp2acid [C6(99.6)]	1	P60660 [27-37]	0	1599.77	2	800.39	2.6
CDPAGYYCGFK	1xcp2acid [Y/C/G/F/D/P/A/K]; 1xCarbamidomethyl [C1(100)]	1	P60900 [154-164]	0	1595.67	2	798.337	2.68
AYGGSMCAK	1xcp2acid [M/C/S/A/Y/G/K]	1	P49207 [77-85]	0	1202.53	2	601.771	1.75
AVQDLCGWR	1xcp2acid [C6(99.5)]	4	Q9P258 [423-431]	0	1362.66	2	681.836	2.33
NCLNPQFSK	1xcp2acid [N/C/L/P/Q/F/S/K]	1	O75131 [53-61]	0	1365.66	2	683.335	1.33
AITIAGIPQSIIECVK	1xcp2acid [C/V/E/K/A/I/T/G/P/Q/S]	1	Q15366 [145-160]	0	1971.1	2	986.057	2.81
EHINLGCDMDFDIAGPSIR	1xcp2acid [L/G/D/M/N/E/H/I/C/F/A/P/S/R]; 1xCarbamidomethyl [C7(100)]	1	P21796 [121-139]	0	2475.14	3	825.722	2.26
NCVAIAADRR	1xcp2acid [N1(100)]; 1xCarbamidomethyl [C2(100)]	1	P49720 [18-27]	1	1460.74	2	730.876	2.01
VCTLAIIDPGDSDIIR	1xcp2acid [V1(100)]; 1xCarbamidomethyl [C2(100)]	1	P62888 [91-106]	0	2073.07	2	1037.04	2.65
LMCPQEIVDYIADKK	1xcp2acid [L/M/C/P/Q/E/I/V/D/Y/A/K]	1	O14561 [138-152]	1	2081.04	3	694.354	2.04
FRKAQCPIVER	1xcp2acid [C6(99)]	2	P46782 [61-71]	2	1661.89	3	554.637	2.61
WCSWSLSQAR	1xcp2acid [W1(100)]; 1xCarbamidomethyl [C2(100)]	3	P08195 [430-439]	0	1595.74	2	798.374	1.98
SLCLGPALIHTAK	1xcp2acid [S/L/C/G/P/A/I/H/T/K]; 1xCarbamidomethyl [C3(100)]	2	Q99643 [105-117]	0	1695.93	3	565.98	1.98
SHFEQWGTLTDCVVMRDPNTKR	1xcp2acid [D/V/M/R/T/S/H/F/E/Q/W/G/L/C/P/N/K]; 1xCarbamidomethyl [C12(100)]	2	P09651 [32-53]	2	2992.42	4	748.86	3.04
SVPLCILYEK	1xcp2acid [C5(99.4)]	3	P21980 [541-550]	0	1479.79	2	740.402	1.96
GCVQTLVEK	1xcp2acid [G/C/V/Q/T/L/E/K]	1	Q9Y5L0 [124-132]	0	1291.67	2	646.34	2.17
GCEVVVSGK	1xcp2acid [G1(100)]; 1xCarbamidomethyl [C2(100)]	2	P23396 [133-141]	0	1249.62	2	625.314	2.24
GALEGSSCPFR	1xcp2acid [C8(98.8)]	1	P30519 [275-285]	0	1438.68	2	719.841	2.15
NNLSYDCIGR	1xcp2acid [C7(99.5)]	4	Q01581 [80-89]	0	1469.68	2	735.344	2.76
HTVVVYCDRDTQLAR	1xcp2acid [Y/C/D/R/H/T/V/Q/L/A]	1	Q8WVC6 [129-143]	1	2091.04	3	697.684	2.28
ASCLYGQLPK	1xcp2acid [A/S/C/L/Y/G/Q/P/K]; 1xCarbamidomethyl [C3(100)]	4	P09211 [46-55]	0	1451.74	2	726.373	2.21
TLRYCAGWADKIQGR	1xcp2acid [T/L/R/Y/C/A/G/W/D/K/I/Q]	1	P00352 [129-143]	2	2053.04	4	514.015	1.42
QFDLAWQYGPCTGITR	1xcp2acid [P/C/T/Q/F/D/L/A/W/Y/G/I/R]	1	Q9HCU8 [51-66]	0	2171.04	3	724.349	3
QDQVCIAR	1xcp2acid [C5(99.1)]	1	P15170 [449-456]	0	1247.62	2	624.313	1.81
FCLDNGAK	1xcp2acid [C2(99.6)]	1	P00558 [49-56]	0	1182.56	2	591.784	0.96
TRPDGNCFYR	1xcp2acid [C7(100)]	3	Q96FW1 [85-94]	0	1543.71	3	515.241	2.93
RELHGQNPVVTPCNK	1xcp2acid [P/C/N/R/E/L/H/G/Q/V/T/K]	2	Q16630 [147-161]	1	2007.02	4	502.51	2.11
NCDLDVACRR	1xcp2acid [N/C/D/L/V/A/R]; 1xCarbamidomethyl [C8(100)]	1	P30838 [222-231]	1	1536.7	3	512.905	1.92
KICAVGITK	1xcp2acid [C/A/V/I/G/K/T]	1	P55060 [840-848]	1	1247.72	2	624.363	1.74
LGTQTFCSR	1xcp2acid [C7(99.5)]	1	Q9BSJ8 [364-372]	0	1327.65	2	664.325	2.27
MGVVECAK	1xcp2acid [E/C/A/V/K/M/G]	1	Q9UQ80 [291-298]	0	1151.56	2	576.283	1.88
LSAPGCWAACTNFSR	1xcp2acid [L/S/A/P/G/W/C/T/N/F/R]; 2xCarbamidomethyl [C6(100); C10(100)]	1	Q04941 [7-21]	0	2012.91	2	1006.96	2
LTDCVVMR	1xcp2acid [C4(99.4)]	1	P22626 [47-54]	0	1251.62	2	626.316	2.2
LPLVTPHTQCR	1xcp2acid [T/Q/C/H/R/L/P/V]	1	P62191 [49-59]	0	1579.84	3	527.284	1.73
LKTEGSDLCDR	1xcp2acid [C9(98.8)]	2	P04843 [537-547]	1	1551.75	3	517.92	2.05
VVNSCHR	1xcp2acid [C5(99.8)]	3	P48643 [177-183]	0	1129.56	3	377.19	1.77
AQNTWGCGNSLR	1xcp2acid [C7(98)]	1	P02545 [516-527]	0	1621.75	2	811.378	2.64
LECVEPNCR	1xcp2acid [C/R/P/N/L/E/V]; 1xCarbamidomethyl [C3(100)]	2	Q969Q0 [70-78]	0	1434.65	2	717.832	2.83
IEDFGVHCK	1xcp2acid [H/C/V/K/I/E/D/F/G]	1	Q92905 [211-219]	0	1362.65	3	454.887	1.84
MALSCTLNR	1xMet-loss+Acetyl [N-Term]; 1xcp2acid [C5(99.4)]	1	Q7Z4G4 [1-9]	0	1234.62	2	617.816	1.85
RCTKPDRK	1xcp2acid [C2(99.4)]	1	P60059 [24-31]	2	1318.7	3	440.24	2.17
ATGHSGGGCISQGR	1xcp2acid [G8(99.4)]; 1xCarbamidomethyl [C9(100)]	2	Q9HA64 [16-29]	0	1659.77	3	553.927	2.52
KACQIFVR	1xcp2acid [C3(99.8)]	1	P52272 [651-658]	1	1279.7	2	640.354	1.89
GPAGNNDCR	1xcp2acid [C8(99.5)]	2	Q07955 [9-17]	0	1218.53	2	609.771	2.54
GSDFDCELR	1xcp2acid [C6(99.6)]	1	P61978 [140-148]	0	1356.59	2	678.797	2.21
ANSIQGCK	1xcp2acid [G/C/Q/K/A/N/S/I]	1	Q86WR0 [77-84]	0	1135.56	2	568.284	2.35
IKNCLNPQFSK	1xcp2acid [I/K/N/C/L/P/Q/F/S]	1	O75131 [51-61]	1	1606.84	3	536.286	1.62
SPCYVDK	1xcp2acid [C3(100)]	2	P30838 [215-221]	0	1126.52	2	563.765	1.7
GLATFCLDK	1xcp2acid [C6(99.5)]	1	O00264 [124-132]	0	1282.65	2	641.828	1.98
AWNAYPYCR	1xcp2acid [C8(99.7)]	4	P48739 [87-95]	0	1458.66	2	729.835	2.75
FCLGLLSNVNR	1xcp2acid [C2(99.7)]	1	Q99717 [309-319]	0	1550.81	2	775.911	1.67
GCAVVEFK	1xcp2acid [G/C/A/V/E/F/K]	2	P52272 [113-120]	0	1167.59	2	584.297	1.79
YTCSFCGK	1xcp2acid [C6(99.5)]; 1xCarbamidomethyl [C3(100)]	4	P61513 [37-44]	0	1280.54	2	640.776	1.71
GVLFYGPPGCGK	1xcp2acid [G/C/P/K/V/L/F/Y]	2	P55072 [513-524]	0	1509.76	2	755.378	2.41
KTPCGEGSKTWDR	1xcp2acid [P/C/T/G/K/E/S/W/D/R]	1	P60866 [67-79]	2	1779.85	3	593.953	1.88
LPCVAAK	1xcp2acid [C3(100)]	3	O75390 [209-215]	0	1016.56	2	508.782	1.95
LCEEWPVDETKR	1xcp2acid [L/C/E/W/P/V/D/T/K/R]	2	Q9BRT2 [12-23]	1	1819.87	3	607.296	1.49
IIVFSACR	1xcp2acid [C7(99.6)]	5	Q07960 [85-92]	0	1223.66	2	612.334	1.86
SQACGGNLGSIEELR	1xcp2acid [C4(99.6)]	1	Q9Y6E0 [391-405]	0	1848.89	2	924.953	1.95
VVACNLYPFVK	1xcp2acid [A/C/N/V/L/Y/P/F/K]	2	P31939 [98-108]	0	1567.83	2	784.422	2.05
VCIEHHTFFR	1xcp2acid [V/C/I/E/H/T/F/R]	1	Q9H4G0 [366-375]	0	1603.78	3	535.265	1.71
ITGCASPGK	1xcp2acid [G/C/A/I/T/S/P/K]	1	P50991 [376-384]	0	1148.58	2	574.796	1.88
KGAVECCPNCR	1xcp2acid [C6(99.6)]; 2xCarbamidomethyl [C7(100); C10(100)]	2	P31689 [144-154]	1	1608.71	3	536.908	1.43
LCDFGSAK	1xcp2acid [C2(99.4)]	5	P49840 [261-268]	0	1155.55	2	578.279	1.29
MAQEFVNCK	1xMet-loss+Acetyl [N-Term]; 1xcp2acid [C8(99.5)]	4	P35754 [1-9]	0	1295.61	2	648.309	2.69
FACHSASLTVR	1xcp2acid [F/A/C/H/S/L/T/V/R]	2	Q15233 [143-153]	0	1506.75	3	502.923	2.06
SSGGFVWACK	1xcp2acid [C9(99.3)]	1	P48735 [300-309]	0	1356.64	2	678.823	2.13
STCTINYSK	1xcp2acid [C3(100)]	1	P49419 [520-528]	0	1331.63	2	666.319	1.55
AACNLLQR	1xcp2acid [C3(100)]	1	Q01813 [110-117]	0	1203.63	2	602.317	2.02
SCNCLLLK	1xcp2acid [S1(100)]; 2xCarbamidomethyl [C2(100); C4(100)]	8	P06733 [336-343]	0	1322.66	2	661.833	2.12
GCILTLVER	1xcp2acid [G/C/I/L/T/V/E/R]	1	Q99613 [442-450]	0	1318.72	2	659.867	1.97
ACNCLLLK	1xcp2acid [A1(99.7)]; 1xCarbamidomethyl [C4(99.7)]	2	P13929 [336-343]; P09104 [336-343]	0	1249.64	2	625.327	2.14
DVLFLKDCVGPEVEK	1xcp2acid [D/C/V/K/G/L/F/P/E]	1	P00558 [92-106]	1	2006.03	3	669.349	2.47
KIQDHQVVINCAIPK	1xcp2acid [N/C/A/I/K/Q/D/H/V/P]	1	Q8N8S7 [52-66]	1	2021.1	3	674.372	2.38
NCFASVFEK	1xcp2acid [N1(100)]; 1xCarbamidomethyl [C2(100)]	2	O15144 [119-127]	0	1416.66	2	708.837	1.95
YVLHCQGTEEEK	1xcp2acid [C/Q/G/T/H/E/Y/V/L/K]	1	P62495 [331-342]	0	1750.81	3	584.275	2.06
TCLDNLASK	1xcp2acid [T/C/L/D/N/A/S/K]	2	P46940 [1533-1541]	0	1279.64	2	640.32	1.64
RCQYVTEK	1xcp2acid [C2(99.8)]	1	P04075 [201-208]	1	1341.66	2	671.335	2.67
SITCWTLSR	1xcp2acid [C4(99.4)]	2	Q92973 [464-472]	0	1381.69	2	691.352	1.83
EVGETLLYYGCR	1xcp2acid [C11(99.4)]	1	P16435 [556-567]	0	1717.83	2	859.419	2.28
LYQECEK	1xcp2acid [C5(99.8)]	1	O95757 [266-272]	0	1227.57	2	614.287	1.69
VFANPEDCVAFGKGENAKK	1xcp2acid [N/P/V/F/A/E/D/C/G/K]; 1xCarbamidomethyl [C8(100)]	3	P10620 [43-61]	2	2396.17	4	599.799	2.68
LVICPDEGFYK	1xcp2acid [I/C/P/D/L/V/E/G/F/Y/K]	2	P61081 [62-72]	0	1598.79	2	799.9	1.72
GSKDVLRK	1xcp2acid [K/D/G/S/V/L/R]	1	A1X283 [490-497]	2	1217.7	3	406.573	1.59
ECPSVLEYK	1xcp2acid [C2(99.6)]	2	Q9Y617 [223-231]	0	1382.67	2	691.837	1.72
LGYTPVCR	1xcp2acid [C7(99.2)]	4	Q15102 [199-206]	0	1223.62	2	612.314	1.6
ACVMMQGR	1xcp2acid [C2(99.8)]	2	P00491 [77-84]	0	1210.55	2	605.78	1.67
LCDFGLAR	1xcp2acid [C2(99.4)]	6	P27361 [182-189]	0	1209.61	2	605.307	1.89
ATILDLSCNK	1xcp2acid [S/C/L/N/A/T/I/D/K]	2	Q96AG4 [41-50]	0	1392.72	2	696.865	2.42
TVFAEHISDECKR	1xcp2acid [C/K/E/R/T/V/F/A/H/I/S/D]	1	P39023 [104-116]	1	1849.89	3	617.301	2.12
NCSSFLIK	1xcp2acid [C2(99.8)]	3	P46779 [12-19]	0	1226.62	2	613.816	1.92
LFCVGFTK	1xcp2acid [C3(100)]	5	P61247 [137-144]	0	1229.64	2	615.325	1.81
KCSASNR	1xcp2acid [C2(99.8)]	2	P63220 [16-22]	1	1080.53	2	540.767	1.86
DNIACVILTFKEPFGTEGR	1xcp2acid [A/C/V/I/D/N/L/T/F/K/E/P/G/R]	1	P11413 [228-246]	1	2425.22	3	809.084	4.23
ITVPFLEQCPIR	1xcp2acid [C9(99.1)]	1	P48147 [49-60]	0	1730.93	2	865.97	2.54
AGKPVICATQMLESMIK	1xcp2acid [A/T/Q/M/L/E/I/S/G/K/P/V/C]; 1xCarbamidomethyl [C7(100)]	4	P14618 [320-336]	0	2192.13	3	731.38	1.9
ITLECLPQNVGFYK	1xcp2acid [C5(99.4)]	1	Q96EK6 [153-166]	0	1940	2	970.509	2.24
KAQCPIVER	1xcp2acid [Q3(99.2)]; 1xCarbamidomethyl [C4(100)]	3	P46782 [63-71]	1	1415.75	3	472.586	2.24
DCPHISQR	1xcp2acid [D/C/P/H/I/S/Q/R]	2	Q9Y2S7 [142-149]	0	1270.6	3	424.204	1.83
TQVCGILR	1xcp2acid [C4(99.8)]	6	P11413 [10-17]	0	1204.65	2	602.83	2.09
FMTILCTR	1xcp2acid [I/L/C/T/F/M/R]	2	P08133 [547-554]	0	1299.66	2	650.332	1.76
VCASEKPPK	1xcp2acid [V/C/A/S/E/K/P]	1	P45974 [837-845]	0	1273.66	3	425.226	1.38
YTGTLDCAK	1xcp2acid [D/C/A/K/Y/T/G/L]	1	O43772 [149-157]	0	1286.61	2	643.808	1.99
TGCTFPEKPDFH	1xcp2acid [C3(99.2)]	3	P55263 [351-362]	0	1693.77	3	565.261	2.48
NTGIICTIGPASR	1xcp2acid [I/T/N/G/C/P/A/S/R]; 1xCarbamidomethyl [C6(100)]	4	P14618 [44-56]	0	1674.86	2	837.935	2.36
TFEVCDLPVR	1xcp2acid [C5(99.1)]	1	P35606 [52-61]	0	1493.75	2	747.379	2.12
KTKFENLCK	1xcp2acid [C8(99.3)]	2	P07900 [565-573]	2	1425.76	3	475.923	2.32
IICQGFTGK	1xcp2acid [C3(98.7)]	1	P53597 [58-66]	0	1281.67	2	641.338	1.17
CFSVLGFCK	1xcp2acid [F/C/G/K/S/V/L]; 1xCarbamidomethyl [C1(100)]	1	P13010 [339-347]	0	1375.65	2	688.332	2.28
WKAEDCR	1xcp2acid [C6(99.5)]	2	Q14657 [108-114]	1	1222.57	2	611.786	1.92
VYSYFECR	1xcp2acid [C7(99.5)]	2	P43490 [33-40]	0	1381.62	2	691.315	2.1
NYCNIQVTK	1xcp2acid [C3(100)]	1	P48444 [477-485]	0	1397.69	2	699.345	1.56
KVVGCSCVVVK	1xcp2acid [S6(100)]; 2xCarbamidomethyl [C5(100); C7(100)]	2	P25398 [102-112]	1	1549.82	2	775.412	2.1
ACAELHQNVNVK	1xcp2acid [A/C/E/L/H/Q/N/V/K]	1	Q96QK1 [285-296]	0	1640.82	3	547.613	1.85
FDEKENVSNCIQLK	1xcp2acid [N/C/S/I/F/D/E/K/V/Q/L]	1	Q9ULC4 [5-18]	1	1981.97	3	661.326	2.02
NGDYLCVK	1xcp2acid [L/C/V/K/N/G/D/Y]	2	P55884 [522-529]	0	1226.59	2	613.8	1.86
QAEDCITR	1xcp2acid [C5(99.4)]	1	O43813 [129-136]	0	1250.58	2	625.797	2.1
LQLIPGVCGFR	1xcp2acid [C/G/F/V/R/L/Q/I/P]	2	Q16719 [320-330]	0	1517.83	2	759.419	2.03
ELEVLLMCNK	1xcp2acid [M/C/L/N/E/V/K]	2	P62910 [84-93]	0	1506.77	2	753.892	2.4
MLLGNKCDMDDKR	1xcp2acid [G/N/K/C/L/D/M/R]	1	P61026 [118-130]	2	1853.87	4	464.223	2.79
QCEGITSPEGSK	1xcp2acid [Q/C/E/G/I/T/S/P/K]	1	Q9Y570 [237-248]	0	1550.72	2	775.865	1.86
MSTVHEILCK	1xMet-loss+Acetyl [N-Term]; 1xcp2acid [C9(99.7)]	1	P07355 [1-10]	0	1386.71	2	693.86	2.09
TGQATVASGIPAGWMGLDCGPESSK	1xCarbamidomethyl [C19]; 1xcp2acid [D/G]	3	P00558 [298-322]	0	2792.3	3	931.438	2.53
TNLLQVCER	1xcp2acid [C/E/V/R/T/N/L/Q]	2	P18206 [1047-1055]	0	1390.71	2	695.863	2.57
DCYPAVQK	1xcp2acid [D1(99.7)]	4	Q14974 [542-549]	0	1238.59	2	619.795	1.98
YYDAIACLK	1xcp2acid [A6(99.3)]	1	O00170 [202-210]	0	1374.68	2	687.842	1.67
LDDPSCPRPECYR	1xcp2acid [P/E/R/C/Y/L/D/S]; 1xCarbamidomethyl [C6(100)]	1	P41091 [91-103]	0	1922.85	3	641.622	2.71
KPIKCSAPK	1xcp2acid [C/S/A/K/P/I]	1	Q7L9L4 [105-113]	1	1286.73	3	429.582	1.63
IQCVPKEPHSFQSR	1xcp2acid [I/Q/C/V/P/K/E/H/S/F/R]	1	Q9HB07 [303-316]	1	1970.99	4	493.503	1.24
MSETVICSSR	1xMet-loss+Acetyl [N-Term]; 1xcp2acid [C7(98.9)]	3	P50552 [1-10]	0	1338.64	2	669.822	1.75
AIANECQANFISIK	1xcp2acid [A/I/N/E/Q/C/F/S/K]; 1xCarbamidomethyl [C6(100)]	1	P55072 [530-543]	0	1893.95	3	631.99	1.95
DCVGPEVEK	1xcp2acid [D/C/V/G/P/E/K]	3	P00558 [98-106]	0	1290.6	2	645.805	1.98
VNCLDKFWHK	1xcp2acid [N/C/V/L/D/K/F/W/H]	2	Q14847 [18-27]	1	1604.8	3	535.606	1.01
LIIAGTSCYSR	1xcp2acid [C/Y/S/L/I/A/G/T/R]	1	P34896 [197-207]	0	1498.77	2	749.891	2.47
TVIGCSGFHGDCLTLTK	1xcp2acid [G/C/I/T/V/S/F/H/D/L/K]; 1xCarbamidomethyl [C12(100)]	1	P20618 [78-94]	0	2124.03	3	708.682	2.67
IIPGFMCQGGDFTR	1xcp2acid [I1(98.3)]; 1xCarbamidomethyl [C7(100)]	8	P62937 [56-69]	0	1913.9	3	638.64	1.77
NCDLDVACR	1xcp2acid [N1(99.7)]; 2xCarbamidomethyl [C2(100); C8(100)]	1	P30838 [222-230]	0	1437.62	2	719.317	1.6
GTLTLCPYHSDR	1xcp2acid [C6(99.7)]	1	Q13200 [774-785]	0	1677.81	3	559.941	1.73
GVLMYGPPGCGK	1xcp2acid [G/C/P/K/V/L/M/Y]	3	P43686 [201-212]	0	1493.73	2	747.368	2.14
GWALYCAGK	1xcp2acid [C6(99.1)]	2	P35270 [166-174]	0	1283.62	2	642.318	1.99
FAAAYCR	1xcp2acid [C6(99.6)]	2	P08559 [268-274]	0	1116.53	2	558.768	1.98
LGSISCK	1xcp2acid [C6(99.5)]	1	P54577 [514-520]	0	1022.53	2	511.77	1.85
IVLTNPVCTEVGEK	1xcp2acid [P/V/C/T/E/I/L/N/G/K]	1	P41091 [427-440]	0	1816.95	2	908.975	2.55
LGLEGCQR	1xcp2acid [C/Q/G/R/L/E]	1	Q5RKV6 [243-250]	0	1190.6	2	595.803	1.69
EVLDQVCYR	1xcp2acid [C7(99.5)]	1	Q15459 [238-246]	0	1439.7	2	720.355	2.6
ACYGVLR	1xcp2acid [C2(99.8)]	10	P23396 [118-124]	0	1096.56	2	548.783	2.09
AAQDFFSTCR	1xcp2acid [C9(99.5)]	1	P06132 [51-60]	0	1460.66	2	730.835	2.32
LLCGLLAER	1xcp2acid [L/C/G/A/E/R]; 1xCarbamidomethyl [C3(100)]	5	P14174 [79-87]	0	1359.75	2	680.378	2.03
LTHAAPCMLFMK	1xcp2acid [P/C/L/T/H/A/M/F/K]	1	O76003 [140-151]	0	1677.83	3	559.95	1.79
ICDFGFAK	1xcp2acid [C2(99.4)]	2	P51812 [559-566]	0	1215.59	2	608.294	1.35
DEFTNTCPSDKEVEIAYSDVAK	1xcp2acid [T/N/C/F/P/S/D/K/E/V/I/A/Y]	1	Q9Y696 [228-249]	1	2776.27	3	926.098	1.26
LIQYCQSK	1xcp2acid [C5(99.6)]	3	P15121 [196-203]	0	1297.66	2	649.333	1.85
DGQPCGGGGGGEVGTAAAQEK	1xCarbamidomethyl [C5]; 2xcp2acid [Q3; P4]	1	O15522 [177-197]	0	2533.14	3	845.054	2.69
ITASLCDLK	1xcp2acid [C6(99.7)]	1	Q01581 [401-409]	0	1278.68	2	639.842	1.87
NCIDITGVR	1xcp2acid [N1(99.7)]	2	Q12907 [238-246]	0	1305.66	2	653.337	2.44
LTDCVVMRDPASK	1xcp2acid [D/C/L/T/V/M/R/P/A/S/K]	1	P22626 [47-59]	1	1749.87	3	583.96	1.71
TCQQTWEK	1xcp2acid [T/C/Q/W/E/K]	2	P21283 [14-21]	0	1338.61	2	669.812	1.91
VLVTTNVCAR	1xcp2acid [C/A/R/V/L/T/N]	1	Q9UMR2 [386-395]	0	1390.75	2	695.88	2.31
LKVCALR	1xcp2acid [C4(99.2)]	2	Q07020 [98-104]	1	1117.66	3	373.222	1.56
GFCFLEYEDHK	1xcp2acid [G/F/C/L/E/Y/D/H/K]	3	O60506 [287-297]	0	1702.76	3	568.259	1.25
GQKCEFQDAYVLLSEKK	1xcp2acid [E5(94.9)]; 1xCarbamidomethyl [C4(100)]	1	P10809 [234-250]	2	2358.18	4	590.298	2.05
ACAAQTK	1xcp2acid [C2(99.7)]	2	P17980 [239-245]	0	1007.5	2	504.253	1.25
FCIWTESAFR	1xcp2acid [C2(99.7)]	2	P36578 [249-258]	0	1574.75	2	787.873	2.15
AACCLAGAR	1xcp2acid [C4(99.8)]; 1xCarbamidomethyl [C3(100)]	2	O95336 [30-38]	0	1207.57	2	604.29	1.08
IRDVQCTGR	1xcp2acid [C6(99.6)]	2	O15067 [331-339]	1	1362.69	3	454.903	2.31
VIEPGCVR	1xcp2acid [C6(99.6)]	3	O60884 [303-310]	0	1187.62	2	594.316	1.96
LLDRDACDTVR	1xcp2acid [A/C/D/L/R/T/V]	2	Q9NZL4 [195-205]	1	1591.79	3	531.267	2
LKESYCQR	1xcp2acid [C6(99.6)]	2	P63165 [47-54]	1	1341.66	2	671.336	1.84
SILCCLRK	1xcp2acid [L/R/C/K/S/I]; 1xCarbamidomethyl [C4(99.6)]	4	Q15185 [72-79]	1	1307.7	3	436.569	1.76
LKESCVR	1xcp2acid [C5(99.4)]	3	Q9UMY4 [63-69]	1	1149.61	3	383.873	1.66
GNPVPILIPCHR	1xcp2acid [H11(98.8)]	1	P16455 [136-147]	0	1630.89	3	544.301	1.65
FNAVLCSR	1xcp2acid [C6(99.6)]	1	P50995 [379-386]	0	1224.62	2	612.814	2.44
FACHSASLTVR	1xcp2acid [F/A/C/H/S/L/T/V/R]; 1xCarbamidomethyl [C3(100)]	1	Q15233 [143-153]	0	1563.77	3	521.929	1.92
MTVCLETEKK	1xcp2acid [C4(99.3)]	1	P53004 [201-210]	1	1496.75	3	499.587	1.8
AVCMLSNTTAVAEAWAR	1xcp2acid [M/L/S/A/V/N/T/C/E/W/R]; 1xCarbamidomethyl [C3(100)]	1	Q9BQE3 [374-390]	0	2166.05	3	722.693	2.25
HGKYMACCLLYR	1xcp2acid [L/C/Y/H/G/K/M/A/R]; 1xCarbamidomethyl [C7(99.5)]	1	Q71U36 [309-320]; P68363 [309-320]; Q9BQE3 [309-320]	1	1829.86	3	610.626	1.08
KGKPHCSR	1xcp2acid [C6(99.6)]	6	Q02878 [39-46]	1	1227.64	3	409.885	2.54
IFHLEVCSR	1xcp2acid [C7(99.5)]	2	O75886 [79-87]	0	1418.72	3	473.578	1.66
ENFSCLTR	1xcp2acid [C5(99.5)]	1	P40925 [150-157]	0	1284.6	2	642.805	1.83
ARVECQSHR	1xcp2acid [C5(99.7)]	2	O14818 [87-95]	1	1400.69	3	467.567	2.9
KLVSIVHGCR	1xcp2acid [C9(99.5)]	1	Q9BSJ8 [987-996]	1	1426.8	3	476.27	2.33
EGPLCDELIR	1xcp2acid [C5(99.1)]	1	Q15029 [776-785]	0	1459.72	2	730.369	1.72
NVNCLALDGR	1xcp2acid [N/C/V/L/A/D/G/R]	1	Q53FA7 [225-234]	0	1389.69	2	695.351	1.19
NHLGSYECK	1xcp2acid [C8(99.8)]	1	Q15428 [49-57]	0	1365.63	2	683.321	2.26
VSLLCPLGK	1xcp2acid [L/C/P/V/S/G/K]	2	O75925 [331-339]	0	1244.71	2	622.857	1.98
KMGVPYCIIK	1xcp2acid [Y/C/P/K/M/G/V/I]	1	P62424 [176-185]	1	1466.79	2	733.898	2.32
VAHSFNCTPIEGMLSHQLK	1xcp2acid [M13(94.8)]; 1xCarbamidomethyl [C7(100)]	1	Q9UQ80 [173-191]	0	2484.22	5	497.65	1.88
VTWAHPEFGQVLASCSFDR	1xcp2acid [S/C/F/D/V/T/W/A/H/P/E/G/Q/L/R]	1	Q96EE3 [63-81]	0	2465.17	3	822.402	3.01
IAVHCTVR	1xcp2acid [C5(99)]	4	P62913 [68-75]	0	1213.65	3	405.222	1.45
KCTENDIR	1xcp2acid [C2(99.4)]	4	Q92879 [118-125]	1	1293.63	3	431.88	1.74
EVAALCR	1xcp2acid [C6(99.8)]	7	P12956 [393-399]	0	1076.56	2	538.781	1.96
ANACNSVIK	1xcp2acid [C/N/A/S/V/I/K]	1	P16615 [468-476]	0	1234.62	2	617.815	1.63
AACFAIQK	1xcp2acid [C3(99.3)]	2	O15269 [190-197]	0	1166.6	2	583.805	1.4
WPISYCR	1xcp2acid [C6(99.7)]	5	Q8NBX0 [233-239]	0	1239.6	2	620.301	2.34
AICDHVR	1xcp2acid [C3(100)]	4	P40925 [249-255]	0	1128.56	3	376.859	1.72
SCAGISGK	1xcp2acid [S/C/A/G/I/K]	3	P33947 [28-35]; P24390 [28-35]	0	1037.51	2	519.257	2
ELVLDNCK	1xcp2acid [C7(99.7)]	5	Q92688 [21-28]	0	1248.63	2	624.818	2.34
KKVVFCPVK	1xcp2acid [F/C/P/V/K]	2	Q9UBE0 [209-217]	2	1362.8	3	454.937	1.89
ALTDAGCNLNPLQYIK	1xcp2acid [A/L/T/D/G/C/N/P/Q/Y/I/K]	1	Q8WVM8 [479-494]	0	2049.05	2	1025.03	2.32
NIHESCMSQIGWNR	1xcp2acid [M/S/E/Q/N/I/H/C/G/W/R]; 1xCarbamidomethyl [C6(100)]	3	P11413 [153-166]	0	2046.93	4	512.486	1.89
IECGPKYPEAPPFVR	1xcp2acid [I1(96.8)]	1	Q13404 [69-83]	1	2018.02	3	673.35	2.31
ICNQVLVCER	1xcp2acid [C/E/V/R/I/N/Q/L]; 1xCarbamidomethyl [C2(100)]	1	Q9P2R7 [151-160]	0	1548.77	2	774.883	1.63
SAVENCQDSWRR	1xcp2acid [N/C/Q/D/S/A/V/E/W/R]	3	P52209 [397-408]	1	1765.81	3	589.275	2.84
LYGIQAFCK	1xcp2acid [F/C/A/K/L/Y/G/I/Q]	1	Q9HAV7 [101-109]	0	1357.7	2	679.353	1.72
HLESWCVQR	1xcp2acid [C/V/Q/W/R/H/L/E/S]	1	Q9Y6M9 [26-34]	0	1472.71	2	736.862	1.57
IASHPILCR	1xcp2acid [L/C/I/R/A/S/H/P]	2	O95219 [165-173]	0	1324.72	3	442.245	1.87
LVVVLCNLKPQK	1xcp2acid [C6(98.1)]	1	P54577 [419-430]	0	1668.99	3	557	2.28
GCVQTLVEK	1xcp2acid [G1(100)]; 1xCarbamidomethyl [C2(100)]	1	Q9Y5L0 [124-132]	0	1348.69	2	674.849	1.18
KLMEECK	1xcp2acid [E/C/K/L/M]	1	Q9P0L0 [174-180]	1	1195.58	2	598.294	1.76
ALANSLACQGK	1xcp2acid [A/Q/G/L/K/N/S/C]; 1xCarbamidomethyl [C8(100)]	1	P04075 [332-342]	0	1447.74	2	724.37	2.28
INAGMLAQFIDKPVCFVGR	1xcp2acid [P/V/C/F/G/K/R/I/N/A/M/L/Q/D]	1	P35244 [12-30]	0	2394.25	3	798.759	3.96
IVGCSVHK	1xcp2acid [G/C/S/V/I/H/K]	2	P07910 [43-50]	0	1157.61	3	386.542	1.78
VTQDATPGSALDKITASLCDLK	1xcp2acid [T/A/S/L/C/D/I/V/Q/P/G/K]	1	Q01581 [388-409]	1	2562.31	3	854.777	2.69
TCTFILR	1xcp2acid [C2(99.8)]	2	Q99832 [369-375]	0	1168.62	2	584.813	1.36
RSCLVRPLMNDEGLK	1xcp2acid [R/S/C/L/V/P/M/N/D/E/G/K]	1	P30838 [426-440]	1	2046.06	3	682.694	2.71
MRHLPYFCR	1xMet-loss [N-Term]; 1xcp2acid [C8(99.5)]	3	Q969G6 [1-9]	1	1406.72	3	469.576	2.08
MLVIEQCK	1xcp2acid [C7(99.3)]	1	P48643 [371-378]	0	1278.66	2	639.832	1.96
VQEYCYDNIHFMK	1xcp2acid [E/Y/C/V/Q/D/N/I/H/F/M/K]	1	Q9Y6E2 [346-358]	0	2004.9	3	668.974	1.89
NICQQVNIK	1xcp2acid [C3(100)]	3	Q14152 [76-84]	0	1374.72	2	687.864	1.58
TLHSCSVR	1xcp2acid [C5(99.3)]	2	P53618 [386-393]	0	1217.61	3	406.542	1.73
VLGPCSDILKR	1xcp2acid [C5(99)]	1	P10644 [358-368]	1	1515.84	3	505.95	1.62
ALGKHPVSCK	1xcp2acid [S/C/V/K/A/L/G/H/P]	2	Q16836 [203-212]	1	1354.73	3	452.248	1.84
IATCLELR	1xcp2acid [C4(99.5)]	2	Q96BJ3 [66-73]	0	1233.67	2	617.336	1.65
TGYSFVNCK	1xcp2acid [C8(99.4)]	1	P43897 [57-65]	0	1333.62	2	667.317	1.41
TATAVAHCK	1xcp2acid [K9(99.8)]; 1xCarbamidomethyl [C8(100)]	1	P62249 [18-26]	0	1273.64	2	637.323	1.82
EGAKLECGGGPWGNK	1xcp2acid [G/A/K/L/E/C/P/W/N]; 1xCarbamidomethyl [C7(100)]	1	P00352 [364-378]	1	1874.89	3	625.633	1.99
NCVLLSRPEISTDER	1xcp2acid [C2(99.4)]	1	O94855 [852-866]	0	2047.03	3	683.016	2.28
TNGILFCGR	1xcp2acid [C/G/F/R/T/N/I/L]	3	P35237 [364-372]	0	1295.66	2	648.332	2.23
EAESCDCLQGFQLTHSLGGGTGSGMGTLLLSK	2xCarbamidomethyl [C5; C7]; 1xcp2acid [S/H/D]	3	P07437 [123-154]; P68371 [123-154]	0	3626.69	4	907.43	2.08
TGCIGAK	1xcp2acid [C3(99.8)]	4	P62913 [148-154]	0	964.492	2	482.749	1.3
VCAQINK	1xcp2acid [C2(99.3)]	2	Q14790 [163-169]	0	1090.57	2	545.79	1.57
YSQICAK	1xcp2acid [C5(99.6)]	3	Q5VTU8 [15-21]	0	1127.56	2	564.281	1.99
YDDMATCMK	1xcp2acid [C7(99.5)]	1	P27348 [19-27]	0	1392.56	2	696.784	2.02
YNFFTGCPK	1xcp2acid [G/C/T/P/Y/N/F/K]	3	Q99832 [358-366]	0	1391.65	2	696.328	2.06
AQAWCYSK	1xcp2acid [C5(99.2)]	1	P51149 [139-146]	0	1271.59	2	636.299	1.68
AACDLVR	1xcp2acid [C3(100)]	2	P55060 [385-391]	0	1062.54	2	531.774	1.94
NYLLQCTR	1xcp2acid [C6(99.5)]	1	Q96QK1 [151-158]	0	1325.67	2	663.337	2.07
GDFCIQVGR	1xcp2acid [C4(99.3)]	3	P15531 [106-114]; P22392 [106-114]	0	1309.64	2	655.321	1.82
ACPRPEGLNFQDLK	1xcp2acid [A1(100)]; 1xCarbamidomethyl [C2(100)]	1	P15927 [218-231]	0	1959.97	3	653.994	1.88
AVAAGNSCR	1xcp2acid [C8(99.4)]	1	Q9Y490 [2189-2197]	0	1163.56	2	582.288	2.18
VFANPEDCVAFGKGENAK	1xcp2acid [N/P/E/D/V/F/A/C/G/K]; 1xCarbamidomethyl [C8(100)]	1	P10620 [43-60]	1	2268.08	3	756.696	1.56
ICDFGASR	1xcp2acid [C2(99.3)]	2	Q9NYL2 [149-156]	0	1183.56	2	592.28	1.23
SCDFLSSFR	1xcp2acid [S/C/D/F/L/R]	2	P35237 [99-107]	0	1376.63	2	688.817	1.68
GLLDVTCK	1xcp2acid [C7(99.6)]	3	P63208 [114-121]	0	1163.61	2	582.307	1.79
GYAFVTFCTK	1xcp2acid [T9(98.9)]	1	O60506 [204-213]	0	1451.7	2	726.356	1.64
HSIHWPCR	1xcp2acid [C7(99.4)]	4	P13010 [243-250]	0	1350.65	3	450.888	2.53
IFQALCK	1xcp2acid [C6(99.3)]	1	P55011 [625-631]	0	1137.61	2	569.307	1.69
ATEGMVVADKNCSK	1xcp2acid [N/C/S/K/A/T/E/G/M/V/D]	1	Q99436 [63-76]	1	1767.84	3	589.951	1.98
EQCEQLEK	1xcp2acid [C3(100)]	1	P07919 [35-42]	0	1321.61	2	661.31	1.68
GIAFPTSISVNNCVCHFSPLK	1xcp2acid [N/V/C/H/G/I/A/F/P/T/S/L/K]; 1xCarbamidomethyl [C]	1	Q9UQ80 [73-93]	0	2606.29	3	869.434	1.66
KEECPAVR	1xcp2acid [C4(100)]	2	P07237 [309-316]	1	1246.62	2	623.816	2.27
SQVTHYSNLLCDLLR	1xcp2acid [C11(98.5)]	1	P56945 [810-824]	0	2077.05	3	693.023	1.87
SCHTAVELFK	1xcp2acid [S1(99.1)]	1	Q9UBV2 [538-547]	0	1449.72	3	483.911	1.83
DIKWDFTPCK	1xcp2acid [P/C/T/K/D/I/W/F]	1	P38606 [130-139]	1	1567.76	2	784.382	1.89
YLHSCPESVKK	1xcp2acid [Y/L/H/S/C/P/E/V/K]	1	Q5TFE4 [193-203]	1	1605.81	4	402.208	1.91
LVPCILEAAK	1xcp2acid [P/C/I/L/V/E/A/K]	2	Q96ER3 [245-254]	0	1371.77	2	686.389	1.3
DLDQCRDGK	1xcp2acid [C/R/Q/D/L/G/K]	2	P60903 [58-66]	1	1364.63	3	455.546	1.71
IAVYSCPFDGMITETK	1xcp2acid [I/A/V/Y/S/P/C/F/D/G/M/T/E/K]; 1xCarbamidomethyl [C6(100)]	1	P50990 [239-254]	0	2147.02	3	716.344	1.46
ILSCGEVIHVK	1xcp2acid [S/C/I/L/G/E/V/H/K]	1	Q9H2U2 [177-187]	0	1512.82	3	504.947	1.01
EMQPTHPIR	1xcp2acid [E/M/Q/P/T/H/I/R]	1	P63104 [159-167]; P31946 [161-169]; P27348 [159-167]	0	1423.72	3	475.24	1.53
LGCQICLTK	1xcp2acid [I/C/L/T/Q/K/G]; 1xCarbamidomethyl [C3(100)]	1	P10109 [150-158]	0	1350.69	2	675.85	2.22
LCFSTSSHL	1xcp2acid [L/C/F/S/T/H]	2	Q8WVV9 [534-542]	0	1309.62	2	655.317	1.68
VRHILCEK	1xcp2acid [C6(99.9)]	2	Q9Y237 [40-47]	1	1312.72	2	656.864	1.92
SLADGILLCK	1xcp2acid [C9(99.4)]	1	Q14651 [158-167]	0	1347.73	2	674.374	2.11
WDFTPCK	1xcp2acid [C6(99.4)]	1	P38606 [133-139]	0	1211.56	2	606.282	1.67
LCDFNPK	1xcp2acid [C2(99.3)]	1	P09496 [217-223]	0	1151.56	2	576.283	1.86
GVCTEAGMYALR	1xcp2acid [G/V/T/C/E/A/M/Y/L/R]; 1xCarbamidomethyl [C3(100)]	1	P62195 [361-372]	0	1642.77	2	821.891	1.8
LCMSLMQNK	1xcp2acid [C2(100)]	1	Q99460 [183-191]	0	1382.66	2	691.833	1.34
VFIWTCDDASSNTWSPK	1xcp2acid [I/W/T/C/V/F/D/A/S/N/P/K]	1	P55735 [240-256]	0	2272.04	3	758.023	1.14
FHTVSGSKCEIK	1xcp2acid [S/G/K/C/E/F/H/T/V/I]	1	Q99729 [216-227]	1	1650.83	3	550.947	2.15
LGFSEYCR	1xcp2acid [C7(99.8)]	3	Q14566 [715-722]	0	1289.6	2	645.304	1.62
IMKDLDQCR	1xcp2acid [C8(99.2)]	1	P60903 [55-63]	1	1436.7	3	479.572	2.5
NSCSSSR	1xcp2acid [C3(99.3)]	2	A6NEC2 [337-343]	0	1055.46	2	528.232	1.49
ASSTCPLTFENVK	1xcp2acid [T/C/S/P/A/L/F/E/N/V/K]	1	P45954 [257-269]	0	1711.84	2	856.423	1.97
VENACTK	1xcp2acid [C5(99.8)]	1	P18206 [81-87]	0	1079.52	2	540.264	1.51
YAGGNPVCVRPTPK	1xcp2acid [C/V/R/P/T/Y/A/G/N/K]	1	Q15004 [47-60]	0	1773.91	3	591.974	1.87
AGQTTYSGVIDCFRK	1xcp2acid [C/F/R/D/K/A/G/Q/T/Y/S/V/I]	1	O75746 [552-566]	1	1960.96	3	654.323	1.43
TAPQCLLR	1xcp2acid [C5(99.5)]	2	Q9H832 [96-103]	0	1216.65	2	608.83	1.31
GFSIPECQK	1xcp2acid [C/Q/E/K/G/F/S/I/P]	1	O75390 [95-103]	0	1323.64	2	662.324	2.05
QLEAETGCK	1xcp2acid [G/C/T/K/Q/L/E/A]	1	Q96PU8 [112-120]	0	1293.61	2	647.309	1.33
NCSSFLIK	1xcp2acid [N1(100)]; 1xCarbamidomethyl [C2(100)]	3	P46779 [12-19]	0	1283.65	2	642.326	2.25
FCLQYTR	1xcp2acid [C2(99.8)]	2	Q14152 [184-190]	0	1245.61	2	623.307	1.51
GCAVVEFK	1xcp2acid [G1(100)]; 1xCarbamidomethyl [C2(100)]	2	P52272 [113-120]	0	1224.61	2	612.807	1.12
VCADLIR	1xcp2acid [C2(99.8)]	8	P60866 [35-41]	0	1104.59	2	552.798	1.36
IAVAAQNCYK	1xcp2acid [N/Y/Q/K/I/A/V/C]; 1xCarbamidomethyl [C8(100)]	1	P60174 [60-69]	0	1452.73	2	726.872	1.87
MALLCYNR	1xMet-loss+Acetyl [N-Term]; 1xcp2acid [C5(99.3)]	1	Q9UHD1 [1-8]	0	1209.61	2	605.308	1.42
KQTIGNSCK	1xcp2acid [K9(99.6)]	1	P55010 [115-123]	1	1293.66	2	647.336	2.14
LEFWCTDVK	1xcp2acid [C5(99.4)]	2	Q9UNM6 [353-361]	0	1455.7	2	728.35	1.61
KDGNASGTTLLEALDCILPPTRPTDKPLR	1xCarbamidomethyl [C16]; 1xcp2acid [E12]	1	P68104 [219-247]	1	3464.82	4	866.959	2.69
LLCNFMR	1xcp2acid [C3(99.4)]	1	P25786 [83-89]	0	1211.61	2	606.307	1.25
KLLDFCK	1xcp2acid [C6(99.7)]	1	P52895 [201-207]	1	1181.64	2	591.325	2.05
SLGVQVCR	1xcp2acid [V/C/Q/R/S/L/G]	1	Q8NFF5 [141-148]	0	1176.62	2	588.814	1.81
NASCGTR	1xcp2acid [S/C/G/T/N/A/R]	1	P60468 [36-42]	0	1023.47	2	512.238	1.24
LPCAVLR	1xcp2acid [C3(99.5)]	2	Q8WUY1 [27-33]	0	1086.61	2	543.81	1.37
AACLCFR	1xcp2acid [C3(99.7)]; 1xCarbamidomethyl [C5(100)]	2	O95989 [21-27]	0	1155.54	2	578.277	1.65
ECLTLLSQR	1xcp2acid [E/C/L/T/S/Q/R]	2	Q13505 [325-333]	0	1377.72	2	689.365	1.01
VCFGMLPK	1xcp2acid [C2(99.7)]	2	Q9Y3E5 [35-42]	0	1209.62	2	605.311	1.96
YLECSALTQR	1xcp2acid [Y1(99.2)]; 1xCarbamidomethyl [C4(100)]	1	P63000 [154-163]	0	1555.76	2	778.382	1.51
SCYEDGWLIK	1xcp2acid [S/C/Y/E/D/G/W/L/I/K]	1	P23434 [137-146]	0	1528.71	2	764.861	1.84
MVLLAAAVCTK	1xMet-loss [N-Term]; 1xcp2acid [V/C/T/A/K/M/L]	3	P48444 [1-11]	0	1303.74	2	652.378	1.76
AATACFGFPK	1xcp2acid [C5(98.6)]	2	Q9UJA5 [239-248]	0	1327.65	2	664.33	1.74
KTRPDGNCFYR	1xcp2acid [G6(98.9)]	1	Q96FW1 [84-94]	1	1671.81	3	557.941	1.43
LLHVFACACPGCSTGGAR	1xcp2acid [C9(99.5)]; 2xCarbamidomethyl [C7(100); C12(100)]	1	Q9BRP1 [74-91]	0	2192.02	3	731.35	1.94
LRTACER	1xcp2acid [C5(100)]	1	P11142 [263-269]; P0DMV9 [263-269]	1	1163.6	2	582.303	2.17
LDCAQLK	1xcp2acid [D/C/L/A/Q/K]	1	P09543 [156-162]	0	1105.57	2	553.289	1.31
SCAGISGK	1xcp2acid [S1(100)]; 1xCarbamidomethyl [C2(100)]	5	P33947 [28-35]; P24390 [28-35]	0	1094.53	2	547.769	1.75
KECENCDCLQGFQLTHSLGGGTGSGMGTLLISK	1xcp2acid [S/L/E/C/N/D/Q/G/F/T/H/K/M/I]	1	Q13509 [122-154]	1	3699.73	4	925.694	2.46
MKLNISFPATGCQK	1xcp2acid [G/C/T/Q/M/K/L/N/I/S/F/P/A]	3	P62753 [1-14]	1	1852.94	3	618.323	2.87
KLGNNCVFAPADVTSEK	1xcp2acid [L/G/N/C/K/V/F/A/P/D/T/S/E]	1	Q99714 [53-69]	1	2108.05	3	703.356	1.75
GWAPTFLGYSMQGLCK	1xcp2acid [C15(98.3)]	1	Q00325 [122-137]	0	2073.99	2	1037.5	2.18
AEALCK	1xcp2acid [C5(99.6)]	1	Q5VW32 [284-289]	0	949.481	2	475.243	1.63
VECQSHR	1xcp2acid [C3(99.7)]	4	O14818 [89-95]	0	1173.55	2	587.279	1.94
APEILLGCK	1xcp2acid [G/C/L/K/A/P/E/I]	1	P24941 [170-178]	0	1258.69	2	629.847	2.19
YIEACAR	1xcp2acid [C5(99.4)]	3	O60701 [108-114]	0	1140.55	2	570.778	1.75
MIPCDFLIPVQTQHPIR	1xcp2acid [M/I/P/D/F/L/C/V/Q/T/H/R]; 1xCarbamidomethyl [C4(100)]	1	P06744 [401-417]	0	2380.23	3	794.083	2.06
KVVFCPVK	1xcp2acid [F/C/K/V/P]	1	Q9UBE0 [210-217]	1	1234.7	2	617.855	2.21
ICALDDNVCMAFAGLTADAR	1xcp2acid [I/A/L/D/N/V/M/C/F/G/T/R]; 2xCarbamidomethyl [C2(100); C9(100)]	3	O14818 [62-81]	0	2499.15	3	833.721	1.93
NCMTDLLAK	1xcp2acid [M3(99)]; 1xCarbamidomethyl [C2(100)]	2	Q00765 [17-25]	0	1380.67	2	690.835	1.21
QITSYGETCPGLEQYAIKK	1xcp2acid [Q/I/T/S/Y/G/E/C/P/L/A/K]; 1xCarbamidomethyl [C9(100)]	1	P50990 [422-440]	1	2501.24	3	834.415	1.6
LLPLNDCR	1xcp2acid [C7(99.5)]	2	Q9Y281 [74-81]	0	1258.66	2	629.834	1.61
MAAQCVTK	1xMet-loss+Acetyl [N-Term]; 1xcp2acid [C5(99.4)]	2	O75131 [1-8]	0	1077.54	2	539.275	1.76
AYHEQLSVAEITNACFEPANQMVK	1xCarbamidomethyl [C15]; 1xcp2acid [E17]	1	Q71U36 [281-304]; P68363 [281-304]	0	3065.45	4	767.119	2.49
GIFPVLCK	1xcp2acid [C7(99.3)]	3	P14618 [468-475]	0	1191.66	2	596.333	1.78
GKNCVAIAADRR	1xcp2acid [N/C/V/A/G/K/I/D/R]	2	P49720 [16-27]	2	1588.84	3	530.283	2.72
SRDVSCSR	1xcp2acid [C6(99.7)]	2	Q96S97 [274-281]	1	1224.58	3	408.865	1.74
ILCLFRPQSGR	1xcp2acid [C3(98.9)]	2	O43598 [115-125]	0	1604.87	3	535.629	1.03
GFEVVYMTEPIDEYCVQQLK	1xcp2acid [Y/M/T/E/P/I/D/V/G/F/C/Q/L/K]; 1xCarbamidomethyl [C15(100)]	2	P08238 [507-526]	0	2763.3	3	921.773	2.19
FDNLYGCR	1xcp2acid [C7(99.5)]	1	P23526 [189-196]	0	1302.59	2	651.799	1.93
ALAIEEFCK	1xcp2acid [F/C/E/K/A/L/I]	1	Q9NUJ1 [93-101]	0	1338.68	2	669.843	2.03
TCEESSFCKR	1xcp2acid [T/C/E/S/F/K/R]; 1xCarbamidomethyl [C8(100)]	1	Q14697 [40-49]	1	1561.68	3	521.227	2.22
VGAFTMVCK	1xcp2acid [V/C/M/K/G/A/F/T]	1	P00505 [288-296]	0	1270.63	2	635.819	1.63
KLGAICR	1xcp2acid [C6(99.7)]	1	Q86WA8 [567-573]	1	1075.61	2	538.308	1.29
KTPCGEGSK	1xcp2acid [C4(99.3)]	3	P60866 [67-75]	1	1221.59	3	407.869	1.89
QWNNCAFLESSAK	1xcp2acid [N4(98.2)]; 1xCarbamidomethyl [C5(100)]	1	P61224 [137-149]	0	1869.86	2	935.44	1.8
ICSWNVDGLR	1xcp2acid [I1(100)]; 1xCarbamidomethyl [C2(100)]	1	P27695 [64-73]	0	1534.75	2	767.876	1.59
VLTMPETCR	1xcp2acid [T/C/E/R/V/L/M/P]	3	Q99460 [891-899]	0	1364.67	2	682.841	1.91
KCYQQIDR	1xcp2acid [C2(99.1)]	1	Q12982 [228-235]	1	1368.67	3	456.895	1.26
KNASCGTR	1xcp2acid [C5(99.3)]	1	P60468 [35-42]	1	1151.56	3	384.526	2.18
VTNRDIICQIAYAR	1xcp2acid [V1(97)]; 1xCarbamidomethyl [C8(100)]	2	P46777 [55-68]	1	2008.04	3	670.022	2.2
RVPQCPSGR	1xcp2acid [C5(100)]	2	Q16186 [84-92]	1	1314.67	3	438.897	1.85
IQEYCYDNIHFMK	1xcp2acid [I/Q/E/Y/C/D/N/H/F/M/K]; 1xCarbamidomethyl [C5(100)]	1	Q7L1Q6 [345-357]	0	2075.94	3	692.649	1.35
KACTYIR	1xcp2acid [A2(99.7)]	2	P04844 [70-76]	1	1169.61	2	585.309	1.79
ECADLWPR	1xcp2acid [C2(99.5)]	7	P62829 [124-131]	0	1304.61	2	652.809	1.58
AVDCLLDSK	1xcp2acid [C4(99.2)]	1	Q99442 [52-60]	0	1278.64	2	639.822	1.58
LCDFGLAR	1xcp2acid [L1(99.7)]; 1xCarbamidomethyl [C2(100)]	3	P27361 [182-189]	0	1266.63	2	633.821	1.39
TLSGMESYCVR	1xcp2acid [S/Y/C/E/V/T/L/G/M/R]	1	P50991 [442-452]	0	1560.72	2	780.864	1.39
LICDVSR	1xcp2acid [C3(99.5)]	1	P54136 [310-316]	0	1120.58	2	560.793	1.59
DCLNVLNK	1xcp2acid [D/C/L/N/V/K]	1	Q99471 [48-55]	0	1233.63	2	617.319	1.72
TCLPGFPGAPCAIK	1xcp2acid [T/C/L/P/G/F/A/I/K]; 1xCarbamidomethyl [C11(100)]	1	P51610 [1885-1898]	0	1746.87	2	873.934	2.01
IVAECNAVR	1xcp2acid [C5(99.5)]	1	P35221 [333-341]	0	1289.67	2	645.341	2.15
TCFSPNR	1xcp2acid [C2(99.7)]	1	O00303 [255-261]	0	1139.53	2	570.269	1.64
RAPGEVCFPGGK	1xcp2acid [C7(99.6)]	1	P0C024 [66-77]	1	1532.77	3	511.594	1.98
RQVLIRPCSK	1xcp2acid [P/C/S/R/K/Q/V/L/I]	1	P62244 [23-32]	1	1514.86	3	505.624	2.1
YEECKEK	1xcp2acid [C4(99.4)]	1	P15170 [234-240]	1	1243.57	2	622.29	1.77
DVACGANHTLVLDSQKR	1xcp2acid [A/C/G/N/H/T/D/V/L/S/Q/K/R]	1	Q9P258 [334-350]	1	2142.08	3	714.701	2.08
VVAIGECGLDFDRLQFCPK	1xcp2acid [F/D/R/L/Q/C/V/A/I/G/E/P/K]; 1xCarbamidomethyl [C7(100)]	1	Q6P1N9 [107-125]	1	2482.23	3	828.086	2.62
CLTKYSQIPSVLVMNKVDCLK	2xcp2acid [D18(99.8); C/L/K/T/Y/S/Q/I/P/V/M/N]	2	O75616 [222-242]	2	3012.58	3	1004.87	1.76
DSCIGVDDR	1xcp2acid [D/S/C/I/G/V/R]	1	Q8WW59 [112-120]	0	1294.57	2	647.792	1.45
ANCEAAR	1xcp2acid [C3(99.4)]	1	Q00341 [634-640]	0	1049.48	2	525.247	1.31
VKTDTVLILCR	1xcp2acid [C10(99.3)]	1	Q9HB71 [145-155]	1	1575.89	3	525.969	1.96
ACNVLQSSHLEDYPFNAEY	1xcp2acid [A/N/V/L/Q/S/H/C/E/D/Y/P/F]; 1xCarbamidomethyl [C2(100)]	1	O60218 [298-316]	0	2572.14	3	858.053	2.22
ALDYCHSK	1xcp2acid [Y/C/H/S/A/L/D/K]	1	P19784 [144-151]	0	1251.58	3	417.866	0.8
YMACCLLYRGDVVPK	1xcp2acid [L/C/Y/R/G/D/M/A/V/P/K]; 1xCarbamidomethyl [C]	1	Q71U36 [312-326]; P68363 [312-326]; Q9BQE3 [312-326]	1	2103.02	3	701.682	2.22
YICPHAPR	1xcp2acid [Y/I/C/P/H/A/R]	2	O95372 [54-61]	0	1271.64	3	424.549	1.41
AIHNICSVCR	1xcp2acid [C6(99.1)]; 1xCarbamidomethyl [C9(100)]	2	Q9Y5L0 [522-531]	0	1487.72	3	496.579	1.58
LMEECK	1xcp2acid [C5(99.3)]	1	Q9P0L0 [175-180]	0	1067.49	2	534.248	1.33
EGLLLWCQR	1xcp2acid [C7(99.6)]	3	P12814 [148-156]; P35609 [155-163]; O43707 [167-175]	0	1432.74	2	716.873	2.05
FLGCVDIK	1xcp2acid [C/V/G/D/F/L/I/K]	2	Q9UNM6 [179-186]	0	1209.63	2	605.32	1.23
TFVDFFSQCLHEEYR	1xcp2acid [C/L/Q/H/T/F/V/D/S/E/Y/R]	1	Q53GQ0 [207-221]	0	2236.02	3	746.014	2.16
TDGCHAYLSK	1xcp2acid [T/D/G/C/H/A/Y/L/S/K]	1	Q01518 [413-422]	0	1409.65	3	470.556	1.31
GEELSCEER	1xcp2acid [C6(99.4)]	1	P31947 [33-41]	0	1366.59	2	683.802	1.38
GQNVTEEECLEK	1xcp2acid [E/C/L/K/G/Q/N/V/T]	1	Q9NZD2 [168-179]	0	1693.77	2	847.392	1.95
SCNCLLLK	2xcp2acid [C4(100); S/C/N/L/K]	4	P06733 [336-343]	0	1523.77	2	762.39	2.07
KADPQEAINCLMR	1xcp2acid [L/M/N/R/K/A/D/P/Q/E/I/C]; 1xCarbamidomethyl [C10(100)]	1	P54920 [94-106]	1	1860.91	3	620.975	2.45
KCAADLGLNK	1xcp2acid [K/D/A/C/L/G/N]; 1xCarbamidomethyl [C2(100)]	1	P49773 [83-92]	1	1404.73	2	702.868	2.06
RAQAWCYSK	1xcp2acid [C6(99.8)]	1	P51149 [138-146]	1	1427.69	2	714.351	2.42
KFPVFNPATEEELCQVEEGDKEDVDK	1xCarbamidomethyl [C14]; 1xcp2acid [A8]	1	P00352 [37-62]	2	3367.57	4	842.648	2.43
KLENCNYAVELGK	1xcp2acid [N4(97.7)]; 1xCarbamidomethyl [C5(100)]	1	P13797 [459-471]	1	1852.93	3	618.315	1.81
FLESGGK	1xcp2acid [E/S/F/L/G/K]	1	Q9UBP9 [152-158]	0	1052.54	2	526.773	1.04
KINPICNDHYR	1xcp2acid [C6(98.8)]	1	Q96KB5 [65-75]	1	1687.84	3	563.281	2.15
KTATAVAHCK	1xcp2acid [H/C/A/K/T/V]	1	P62249 [17-26]	1	1344.71	3	448.908	1.54
NMACVQR	1xcp2acid [C4(99.8)]	1	P37802 [121-127]	0	1136.53	2	568.771	1.68
ICLDILKDK	1xcp2acid [C2(99.8)]	2	P61088 [86-94]	1	1375.77	2	688.387	1.95
MRPGVACSVSQAQK	1xcp2acid [M/R/P/G/V/A/S/C/Q/K]; 1xCarbamidomethyl [C7(100)]	2	P32969 [128-141]	0	1833.91	3	611.977	1.48
MEVLGFVAKLHK	1xcp2acid [M1(100)]	1	Q9HAY2 [252-263]	1	1686.94	3	562.982	1.92
IDPTLCR	1xcp2acid [C6(99.5)]	1	P41091 [343-349]	0	1132.58	2	566.795	1.73
MASVGECPAPVPVK	1xMet-loss+Acetyl [N-Term]; 1xcp2acid [C7(98.3)]	2	P56134 [1-14]	0	1610.82	2	805.919	2.34
LIDFLECGK	1xcp2acid [E/C/G/K/L/I/D/F]	1	P17844 [228-236]	0	1352.69	2	676.852	1.58
LLIEKCNTVK	1xcp2acid [C/N/T/V/K/L/I/E]	1	P61289 [128-137]	1	1475.83	3	492.614	1.78
ILLHLFK	1xcp2acid [I1(99.8)]	2	Q93074 [1175-1181]	0	1198.73	3	400.25	2.04
LNVCVSK	1xcp2acid [C4(99.3)]	2	Q8WVV9 [402-408]	0	1077.58	2	539.291	1.34
QATEGPCK	1xcp2acid [C7(99.6)]	3	Q5T8D3 [77-84]	0	1148.54	2	574.773	2.15
FENLCK	1xcp2acid [L/C/K/F/E/N]	2	P07900 [568-573]; P08238 [560-565]	0	1068.52	2	534.763	1.45
YYYQGCASWK	1xcp2acid [G/C/Q/A/S/W/Y/K]	1	Q9H0D6 [552-561]	0	1583.7	2	792.356	1.45
ETDCVLTQK	1xcp2acid [D/C/T/V/E/L/Q/K]	1	P51003 [33-41]	0	1351.66	2	676.331	1.3
EIRPVCR	1xcp2acid [C6(99.7)]	1	Q13838 [234-240]	0	1187.64	3	396.55	1.37
EMVECFNK	1xcp2acid [E/C/V/F/M/N/K]	1	Q13011 [88-95]	0	1314.59	2	657.796	1.71
EVCEEAGVK	1xcp2acid [E/V/C/A/G/K]	1	O95989 [66-74]	0	1278.6	2	639.804	1.23
SACGVCPGR	2xcp2acid [C3(100); C6(99.1)]	1	P49207 [44-52]	0	1479.69	2	740.349	1.48
VIGSGCNLDSAR	1xcp2acid [N7(98.8)]; 1xCarbamidomethyl [C6(100)]	3	P07195 [159-170]; P00338 [158-169]	0	1563.76	2	782.38	1.8
LTEGCSFR	1xcp2acid [C5(99.6)]	4	Q71UM5 [73-80]	0	1227.58	2	614.294	1.4
SACGVCPGR	1xcp2acid [C3(99.1)]; 1xCarbamidomethyl [C6(100)]	1	P49207 [44-52]	0	1221.55	2	611.277	1.77
LFSQFCNK	1xcp2acid [F/C/Q/L/S/N/K]	1	Q6GMV2 [189-196]	0	1301.63	2	651.322	1.53
VIDPVTGKPCAGTTYLESPLSSETTQLSK	1xcp2acid [T/G/K/P/C/A/Y/D/V/L/I/E/S/Q]	1	Q9Y2R5 [91-119]	0	3337.69	3	1113.23	1.44
IISANGCK	1xcp2acid [G/C/N/K/I/S/A]	1	P05023 [205-212]	0	1120.58	2	560.794	1.87
INLNCTQK	1xcp2acid [C5(99.2)]	1	Q9GZT8 [209-216]	0	1248.64	2	624.826	2.01
AQCPIVER	1xcp2acid [C3(100)]	2	P46782 [64-71]	0	1230.63	2	615.819	1.85
MVILLCNLKPAK	1xcp2acid [C/N/L/K/M/V/I/P/A]	1	Q12904 [206-217]	0	1657.95	3	553.321	1.49
GCIPTMAR	1xcp2acid [G/C/I/P/T/M/A/R]	3	Q02978 [183-190]	0	1163.57	2	582.288	0.93
MQDCQR	1xcp2acid [C4(99.8)]	1	P36404 [99-104]	0	1095.47	2	548.24	1.9
LCLAVK	1xcp2acid [C2(99.8)]	2	O00232 [192-197]	0	961.554	2	481.279	1.62
LCFLDKVEPHATIAEIK	1xcp2acid [L/C/F/D/K/V/E/P/H/A/T/I]	1	Q9NZ01 [17-33]	1	2242.19	4	561.303	2.63
FCILGK	1xcp2acid [C2(99.8)]	3	Q9P035 [172-177]	0	995.538	2	498.271	1.73
ALNVEPDGTGLTCSLAPNIISQL	1xcp2acid [T/C/S/L/A/P/D/G/N/I/V/E/Q]	1	P30044 [192-214]	0	2641.35	3	881.121	1.9
KYEDICPSTHNMDVPNIK	1xcp2acid [P/S/T/H/N/M/I/D/K/Y/E/C/V]; 1xCarbamidomethyl [C6(100)]	1	Q9GZV4 [68-85]	1	2476.16	4	619.799	2.12
NVIETCK	1xcp2acid [T/C/E/K/N/V/I]	1	Q15738 [127-133]	0	1121.57	2	561.287	1.5
IDKEACR	1xcp2acid [C6(99.4)]	3	Q14019 [5-11]	1	1149.57	3	383.862	1.73
QGCDCECLGGGR	1xcp2acid [C3(99.6)]; 1xCarbamidomethyl [C7(99.6)]	1	Q9NRX4 [67-78]	0	1569.62	2	785.31	2
KMRPAR	1xcp2acid [M2(99.9)]	1	Q9NS67 [213-218]	1	1073.6	3	358.541	1.84
NLGELCQR	1xcp2acid [C6(99.7)]	2	Q9UI14 [59-66]	0	1247.62	2	624.317	2.02
YCQEPR	1xcp2acid [C2(99.8)]	4	P42704 [570-575]	0	1110.5	2	555.757	1.73
MCHNVNR	1xcp2acid [M/C/H/N/V/R]	1	P49915 [553-559]	0	1188.54	3	396.851	1.08
VACETVAK	1xcp2acid [A2(99.6)]	1	P31153 [54-61]	0	1135.58	2	568.294	1.58
LNECVDHTPK	1xcp2acid [E/C/V/L/N/D/H/T/P/K]	2	P78417 [189-198]	0	1470.7	3	490.904	1.56
LQFHDVAGDIFHQQCK	1xcp2acid [H/Q/D/I/F/K/L/V/A/G/C]; 1xCarbamidomethyl [C15(100)]	1	P11413 [371-386]	0	2258.08	4	565.276	1.68
VAQDLCK	1xcp2acid [C6(99.5)]	1	P13804 [63-69]	0	1091.56	2	546.279	1.72
YSNSALGHVNCTIK	1xcp2acid [N/C/T/I/V/K/Y/S/A/L/G/H]	1	Q9NQC3 [1091-1104]	0	1821.9	3	607.971	1.9
ACFHCETCK	1xcp2acid [A/C/F/H/E/T/K]; 2xCarbamidomethyl [C5(100); C8(100)]	1	Q14847 [28-36]	0	1470.6	3	490.869	1.6
ITASPDRCFSAWIGASIMTSMSSFK	1xCarbamidomethyl [C8]; 1xcp2acid [M21]	1	Q8TDG2 [330-354]	1	3066.45	4	767.37	2.47
ITFCTGIR	1xcp2acid [C4(98.5)]	2	P55036 [84-91]	0	1225.64	2	613.324	1.52
ALAIMCR	1xcp2acid [C6(99.6)]	1	Q9UHX1 [124-130]	0	1092.57	2	546.788	1.57
IVADQLCAK	1xcp2acid [L/C/A/Q/K/I/V/D]	1	P53990 [119-127]	0	1275.68	2	638.341	1.59
IGGIRMLDGDVTDVVEAK	1xcp2acid [L/D/G/V/T/M/E/A/I/R/K]	1	P29122 [273-290]	1	2203.14	3	735.053	1.9
LFECDRDQMYYNLLK	1xcp2acid [E/C/D/R/Q/M/Y/N/L/F/K]	1	P42704 [949-963]	1	2266.07	3	756.03	1.64
IFCLDGVK	1xcp2acid [C3(100)]	2	P40261 [48-55]	0	1209.63	2	605.32	1.24
AGHCAVAINTR	1xcp2acid [C4(98)]	1	P51610 [323-333]	0	1427.72	3	476.579	1.01
EVVESCR	1xcp2acid [C6(99.7)]	1	O60701 [59-65]	0	1136.54	2	568.772	2.03
LEALCFDGVKR	1xcp2acid [C5(99.2)]	1	O14602 [47-57]	1	1565.81	3	522.61	1.49
VDQICHK	1xcp2acid [C5(99.5)]	1	Q9UBE0 [142-148]	0	1157.58	3	386.53	1.81
IVHLQETCDLGK	1xcp2acid [T/C/D/I/V/H/L/Q/E/G/K]	1	Q9BYT8 [146-157]	0	1670.86	3	557.623	1.83
RPAEIYHCR	1xcp2acid [C8(99.5)]	1	Q9NWU5 [63-71]	0	1459.73	3	487.246	1.72
VYCHYFVK	1xcp2acid [V/Y/C/H/F/K]	1	Q9NWU5 [164-171]	0	1373.67	3	458.561	0.85
TSAVPSPCGK	1xcp2acid [P/C/G/S/K/T/A/V]	1	P49748 [230-239]	0	1261.62	2	631.319	1.84
SCIENILR	1xcp2acid [S/C/I/E/N/L/R]	1	Q9NPH2 [484-491]	0	1262.66	2	631.832	1.18
TACAINK	1xcp2acid [C3(100)]	2	Q52LJ0 [293-299]	0	1035.53	2	518.267	1.05
SCLLLR	1xcp2acid [C2(99.9)]	2	P62820 [25-30]	0	1019.57	2	510.288	1.65
TDACFIR	1xcp2acid [A3(98.7)]	1	P35998 [233-239]	0	1140.55	2	570.779	1.17
VFIMDNCEELIPEYLNFIR	1xcp2acid [V/F/I/M/D/N/E/L/C/P/Y/R]; 1xCarbamidomethyl [C7(100)]	1	P07900 [368-386]	0	2730.33	3	910.782	2.71
FWCWQRPK	1xcp2acid [C3(99.3)]	2	O60443 [43-50]	0	1465.72	3	489.245	1.22
VFNDTCR	1xcp2acid [C6(99.2)]	1	P42704 [108-114]	0	1169.54	2	585.273	1.89
GEHGFIGCR	1xcp2acid [G/C/I/R/E/H/F]	2	Q16658 [390-398]	0	1290.6	3	430.874	1.85
HDQCQR	1xcp2acid [C/Q/R/H/D]	1	Q10471 [123-128]	0	1101.49	2	551.248	1.64
TLSFSTKSLPQAVGQGSSSPPGGK	2xcp2acid [S18(95); Q/A/V/G/S/T/L/F/K/P]	1	Q2KJY2 [1755-1778]	1	2948.52	3	983.51	4.09
RTIAPCQK	1xcp2acid [C6(99.8)]	1	P38646 [361-368]	1	1231.66	2	616.338	2.85
YLAADKDGNVTCER	1xcp2acid [T/C/E/V/R/Y/L/A/D/K/G/N]	1	Q16658 [69-82]	1	1869.88	3	623.966	1.84
AVLGEVKLCEK	1xcp2acid [L/C/E/K/A/V/G]	2	P26641 [202-212]	1	1503.82	3	501.946	1.55
ALLVTASQCQQPAENK	1xcp2acid [Q/A/L/V/T/S/P/C/E/N/K]; 1xCarbamidomethyl [C9(100)]	1	Q01518 [85-100]	0	2073.04	3	691.685	1.25
HEQNIDCGGGYVK	1xcp2acid [C7(95.6)]	1	P27797 [99-111]	0	1734.79	3	578.933	1.31
YLRDVNCPFK	1xcp2acid [C7(99.3)]	1	Q9Y224 [63-72]	1	1569.79	3	523.934	1.84
ARDYCTSAK	1xcp2acid [C/T/Y/S/A/R/D/K]	2	Q13098 [188-196]	1	1329.63	3	443.88	1.09
YLDLHDCYLK	1xcp2acid [D/C/H/Y/L/K]	3	Q12874 [139-148]	0	1597.77	3	533.261	2.11
LAANISGDKLVSLGTCFGK	1xcp2acid [G/T/C/L/F/A/N/I/S/D/K/V]	1	Q9Y221 [54-72]	1	2209.17	3	737.059	1.68
NCVAIAADRR	1xcp2acid [N/C/V/A/I/D/R]	2	P49720 [18-27]	1	1403.72	2	702.364	2.1
HCGALR	1xcp2acid [C2(99.6)]	1	P61313 [109-114]	0	971.488	2	486.245	1.71
RELGCSSVR	1xcp2acid [C5(98.8)]	1	Q9HA64 [7-15]	1	1321.67	3	441.227	1.49
WCNEHLK	1xcp2acid [C2(98.1)]	1	P21333 [52-58]; O75369 [25-31]	0	1244.59	2	622.797	1.21
LSQECPIK	1xcp2acid [E/C/Q/P/L/S/I/K]	1	Q9Y6E2 [266-273]	0	1232.63	2	616.82	1.79
YCAGWADK	1xcp2acid [Y1(99.6)]; 1xCarbamidomethyl [C2(100)]	5	P00352 [132-139]	0	1285.57	2	643.287	1.4
TCAELVR	1xcp2acid [C2(99.4)]	1	Q86X76 [66-72]	0	1106.57	2	553.786	1.52
SIPICTLK	1xcp2acid [L7(98.8)]	1	P22314 [628-635]	0	1189.66	2	595.337	1.16
VFGSCPR	1xcp2acid [S/C/G/P/V/F/R]	1	O95456 [153-159]	0	1080.53	2	540.768	1.31
LWNEWCR	1xcp2acid [C6(99.6)]	2	O95456 [101-107]	0	1321.61	2	661.31	1.76
LLYEALVDCKK	1xcp2acid [D/C/K/V/L/Y/E/A]	1	Q7L2H7 [167-177]	1	1609.87	3	537.296	1.63
MLYSSCK	1xcp2acid [S/C/K/M/L/Y]	1	Q12792 [270-276]	0	1146.53	2	573.768	1.49
FACFER	1xcp2acid [C3(100)]	2	Q00325 [235-240]	0	1087.5	2	544.255	1.62
FCLESER	1xcp2acid [C2(99.3)]	2	Q9H074 [469-475]	0	1198.56	2	599.782	1.25
ELGCSSVR	1xcp2acid [C4(99.3)]	1	Q9HA64 [8-15]	0	1165.57	2	583.288	1.5
IICNTKDNER	1xcp2acid [I1(99.3)]	1	Q16881 [575-584]	1	1520.75	3	507.587	1.65
FNKILR	1xcp2acid [F1(99.7)]	1	Q8WXX0 [1869-1874]	1	1105.65	3	369.224	0.94
VIVCNTK	1xcp2acid [C4(99.3)]	1	P17931 [170-176]	0	1091.59	2	546.299	1.59
YGCLAGVR	1xcp2acid [C3(99.6)]	1	Q9P258 [142-149]	0	1153.58	2	577.293	1.43
DSCPLDCK	1xcp2acid [D/S/C/P/L/K]; 1xCarbamidomethyl [C7(100)]	1	P84103 [4-11]	0	1252.53	2	626.77	1.16
SKCEEMK	1xcp2acid [C3(99.8)]	1	Q14533 [299-305]	1	1169.53	2	585.27	1.61
ENVDVPLVICGNK	1xcp2acid [E/N/V/D/P/L/I/C/G/K]; 1xCarbamidomethyl [C10(100)]	1	Q9Y272 [134-146]	0	1771.9	3	591.311	2.09
FCPFAER	1xcp2acid [C2(99.2)]	3	P78417 [31-37]	0	1184.56	2	592.781	1.36
ALDLDSSCK	1xcp2acid [S/C/K/A/L/D]	1	P31948 [454-462]	0	1266.6	2	633.808	2.38
KCSTPEEIK	1xcp2acid [K1(99.6)]; 1xCarbamidomethyl [C2(100)]	1	P60981 [22-30]	1	1406.7	2	703.854	1.73
TYVPCLK	1xcp2acid [C5(99.7)]	3	Q96A35 [186-192]	0	1138.6	2	569.802	1.5
KITIADCGQLE	1xcp2acid [C7(99.5)]	1	P62937 [155-165]	1	1505.77	2	753.386	2.53
ATYIHNCLK	1xcp2acid [N/C/H/L/A/T/Y/I/K]	1	Q9NP79 [149-157]	0	1377.7	2	689.356	2.02
SCGSLLPELK	1xcp2acid [S/C/G/L/P/E/K]	1	P42704 [129-138]	0	1361.71	2	681.362	1.59
LAPHCSFAR	1xcp2acid [C5(98.2)]	1	Q9NX61 [21-29]	0	1316.66	3	439.558	1.28
VGLGICYDMR	1xcp2acid [I5(100)]; 1xCarbamidomethyl [C6(100)]	3	Q9NQR4 [148-157]	0	1498.72	2	749.865	1.9
VVVVDDLLATGGTMNAACELLGR	1xCarbamidomethyl [C18]; 1xcp2acid [T/G]	2	P07741 [123-145]	0	2689.37	3	897.126	1.87
HTGPGILSMANAGPNTNGSQFFICTAK	1xCarbamidomethyl [C24]; 1xcp2acid [A10]	1	P62937 [92-118]	0	3106.49	4	777.378	3.27
YHTVNGHNCEVRK	1xcp2acid [N/G/H/T/V/Y/C/E/R/K]; 1xCarbamidomethyl [C9(100)]	1	P09651 [167-179]	1	1928.92	4	482.986	1.84
IEPEPFENCLLRPGSPAR	1xcp2acid [N/C/L/R/E/P/G/S/A/I/F]	1	P48637 [401-418]	0	2340.18	3	780.732	1.85
IKCDKEK	1xcp2acid [C3(99)]	1	P14625 [136-142]	2	1178.62	3	393.546	1.56
ITEFCHR	1xcp2acid [C5(99.7)]	2	P07237 [339-345]	0	1220.59	3	407.534	1.26
KCDKEEK	1xcp2acid [C2(98.3)]	1	Q7LBR1 [24-30]	2	1194.58	3	398.866	1.08
AECLEK	1xcp2acid [C3(99.1)]	1	Q15257 [332-337]	0	1007.49	2	504.247	1.24
ACYDEGKR	1xcp2acid [A/C/Y/D/E/G/K/R]	1	Q8NBZ7 [229-236]	1	1256.57	3	419.528	1.34
FCLDNGAK	1xcp2acid [F1(99.6)]; 1xCarbamidomethyl [C2(100)]	2	P00558 [49-56]	0	1239.58	2	620.294	1.39
MDSKHQCVK	1xAcetyl [N-Term]; 1xcp2acid [Q6(98.9)]	1	P42330 [1-9]	1	1432.67	3	478.227	1.94
GNHECASINR	1xcp2acid [C5(98.8)]	1	P36873 [123-132]	0	1415.65	3	472.555	1.17
FLMECR	1xcp2acid [C5(99.6)]	3	Q13541 [58-63]	0	1113.52	2	557.264	1.54
QAHLCVLASNCDEPMYVK	1xcp2acid [S/N/D/E/P/M/Y/V/A/K/Q/H/L/C]; 2xCarbamidomethyl [C5(100); C11(100)]	1	P25398 [46-63]	0	2450.13	4	613.288	2.47
KVAECQR	1xcp2acid [C/Q/E/R/K/V/A]	1	Q16543 [60-66]	1	1148.59	2	574.798	1.9
YQIDPDACFSAK	1xcp2acid [A/C/P/D/F/S/Y/Q/I/K]	1	P21796 [225-236]	0	1672.77	2	836.891	2.16
LTDYCK	1xcp2acid [C5(99.5)]	1	P42704 [390-395]	0	1057.5	2	529.254	1.51
IGNCPFSQR	1xcp2acid [N3(99.3)]; 1xCarbamidomethyl [C4(100)]	3	O00299 [21-29]	0	1393.67	2	697.337	1.51
TGSQGQCTQVR	1xcp2acid [Q6(99.6)]; 1xCarbamidomethyl [C7(100)]	1	P62857 [21-31]	0	1536.72	2	768.864	1.8
KCSVIR	1xcp2acid [C2(99.8)]	1	P35080 [70-75]	1	1020.57	2	510.787	1.6
NLADCLR	1xcp2acid [C5(99.6)]	1	P49721 [87-93]	0	1119.56	2	560.287	1.41
NMMAACDPR	1xcp2acid [C/D/A/P/N/M/R]	1	Q13509 [298-306]; P07437 [298-306]; P68371 [298-306]	0	1323.56	2	662.286	2.23
GSGSACR	1xcp2acid [C6(99.7)]	1	P53602 [155-161]	0	952.431	2	476.719	1.61
VPCFLR	1xcp2acid [C3(100)]	2	Q9H0V9 [102-107]	0	1049.56	2	525.283	1.42
TCVLFR	1xcp2acid [C2(99.9)]	7	P61026 [23-28]	0	1053.56	2	527.282	1.39
EENVIAVPLGSRSVR	1xcp2acid [E/N/V/I/A/P/L/G/S/R]	1	P82987 [244-258]	1	1941.06	3	647.691	2.48
LLRSCPK	1xcp2acid [S/C/P/L/R/K]	1	Q8WVX9 [30-36]	1	1131.63	2	566.32	1.58
ALIHSACVK	1xcp2acid [S5(99.5)]	1	Q08257 [139-147]	0	1256.68	3	419.565	1.94
VVQHLCQR	1xcp2acid [C/Q/R/L/V/H]	1	Q8WUY1 [163-170]	0	1297.68	3	433.233	1.47
YMLDCR	1xcp2acid [C5(99.7)]	1	Q9Y277 [225-230]	0	1115.5	2	558.254	1.41
LAALCK	1xcp2acid [C5(99.8)]	1	Q9NUQ3 [156-161]	0	933.523	2	467.264	1.48
RACYGVLR	1xcp2acid [A2(99.3)]; 1xCarbamidomethyl [C3(100)]	1	P23396 [117-124]	1	1309.68	2	655.342	1.83
FASGGCDNLIK	1xcp2acid [G/D/N/F/A/S/C/L/I/K]; 1xCarbamidomethyl [C6(100)]	1	P55735 [182-192]	0	1496.72	2	748.863	1.49
ESCDSALR	1xcp2acid [C3(99.2)]	1	P52907 [122-129]	0	1195.54	2	598.277	1.31
LATCSSDR	1xcp2acid [C4(99.6)]	1	P55735 [28-35]	0	1167.55	2	584.277	1.9
EQNYCESR	1xcp2acid [C5(99.5)]	1	Q7L5D6 [156-163]	0	1343.57	2	672.289	1.9
AECRPAASENYMR	1xcp2acid [E/C/R/A/P/S/N/Y/M]	1	P13984 [114-126]	0	1812.82	3	604.942	1.38
AECLEKFPVIQHFK	1xcp2acid [A/E/C/L/K/F/P/V/I/Q/H]	1	Q15257 [332-345]	1	2004.04	4	501.765	0.96
LMEVCK	1xcp2acid [C5(99.4)]	2	O15372 [173-178]	0	1037.52	2	519.262	1.02
FFAPECGR	1xcp2acid [G7(99.6)]	2	Q96HC4 [474-481]	0	1241.58	2	621.293	1.59
AVCTDGK	1xcp2acid [C3(99.5)]	1	Q96MF6 [159-165]	0	1008.48	2	504.743	0.82
TYAICGAIRR	1xcp2acid [C5(98.1)]	3	P63220 [52-61]	1	1438.76	3	480.258	1.54
LEICNLTPDALK	1xcp2acid [C4(98.9)]	1	P07384 [348-359]	0	1644.87	2	822.94	1.62
LLDFCK	1xcp2acid [C5(99.6)]	2	P52895 [202-207]; P42330 [202-207]	0	1053.54	2	527.274	1.55
DILIACR	1xcp2acid [A/C/R/D/I/L]	1	P42704 [1038-1044]	0	1118.6	2	559.806	1.75
YASCLK	1xcp2acid [S/C/L/Y/A/K]	1	Q13098 [338-343]	0	999.497	2	500.252	1.2
LSTACPGR	1xcp2acid [C5(99.2)]	1	P55060 [935-942]	0	1119.56	2	560.283	1.94
ACTYIR	1xcp2acid [C2(99.3)]	1	P04844 [71-76]	0	1041.52	2	521.264	1.52
TVFAEHISDECK	1xcp2acid [S/D/E/C/I/K/T/V/F/A/H]	1	P39023 [104-115]	0	1693.79	3	565.266	1.69
VVCDENGSK	1xcp2acid [V/D/C/E/N/G/S/K]; 1xCarbamidomethyl [C3(100)]	2	P11940 [130-138]	0	1322.6	2	661.807	0.89
ILNADLEKSIR	1xcp2acid [I/L/N/A/D/E/K/S/R]	1	Q9H0I3 [329-339]	1	1586.89	3	529.637	1.56
LIQYCHSK	1xcp2acid [Y/H/S/L/I/Q/C/K]; 1xCarbamidomethyl [C5(100)]	3	O60218 [196-203]; C9JRZ8 [196-203]	0	1363.68	3	455.233	1.5
MVLCPVIGK	1xMet-loss [N-Term]; 1xcp2acid [L/C/M/V/P/I/G/K]	1	O95671 [1-9]	0	1143.66	2	572.334	1.26
LVVECVMNNVTCTR	1xcp2acid [V/E/M/L/N/C/T/R]; 2xCarbamidomethyl [C5(100); C12(100)]	1	Q01469 [116-129]	0	2009.96	3	670.66	1.69
KVFANPEDCVAFGK	1xcp2acid [V2(98.5)]; 1xCarbamidomethyl [C9(100)]	2	P10620 [42-55]	1	1896.93	3	632.982	2.05
LTDYCKK	1xcp2acid [C5(99.2)]	1	P42704 [390-396]	1	1185.6	3	395.871	1.01

## Sheet: TableSI-2 IAyne
Modified cysteines containing proteome labeled by IAyne in MCF-7 living cells
Accession	Description	Sum PEP Score	Coverage [%]	Peptides	PSMs	Unique Peptides	Gene	Abundances (Normalized) IAyne-1	Abundances (Normalized) IAyne-2	two-repeat ratio
Q9Y6X8	Zinc fingers and homeoboxes protein 2	4.155	2	2	3	2	ZHX2	225418	171346	1.31557
Q9Y6U3	Adseverin	4.855	3	2	6	2	SCIN	1.30957e+06	1.41579e+06	0.924973
Q9Y6Q5	AP-1 complex subunit mu-2	20.755	18	7	14	5	AP1M2	543371	432301	1.25693
Q9Y6M9	NADH dehydrogenase [ubiquinone] 1 beta subcomplex subunit 9	5.897	17	2	5	2	NDUFB9	807790	705461	1.14505
Q9Y6J9	TAF6-like RNA polymerase II p300/CBP-associated factor-associated factor 65 kDa subunit 6L	15.158	15	5	8	5	TAF6L	2.00724e+06	2.74037e+06	0.73247
Q9Y6I8	Peroxisomal membrane protein 4	14.925	16	4	21	4	PXMP4	3.41266e+06	2.85589e+06	1.19496
Q9Y6G9	Cytoplasmic dynein 1 light intermediate chain 1	13.041	11	4	11	4	DYNC1LI1	981957	1.14138e+06	0.860324
Q9Y6C9	Mitochondrial carrier homolog 2	68.484	47	10	65	10	MTCH2	9.62409e+06	1.11619e+07	0.862226
Q9Y696	Chloride intracellular channel protein 4	20.804	14	3	18	3	CLIC4	2.83029e+07	2.5595e+07	1.1058
Q9Y678	Coatomer subunit gamma-1	44.884	18	12	41	10	COPG1	3.58266e+06	4.56202e+06	0.785324
Q9Y5Y2	Cytosolic Fe-S cluster assembly factor NUBP2	9.975	11	3	23	3	NUBP2	2.57419e+06	2.49858e+06	1.03026
Q9Y5S9	RNA-binding protein 8A	7.038	19	3	16	3	RBM8A	1.74169e+06	1.4396e+06	1.20984
Q9Y5S2	Serine/threonine-protein kinase MRCK beta	8.312	2	2	4	2	CDC42BPB	4.02224e+06	3.75367e+06	1.07155
Q9Y5L4	Mitochondrial import inner membrane translocase subunit Tim13	7.778	26	2	5	2	TIMM13	2.69688e+06	2.58907e+06	1.04164
Q9Y5K5	Ubiquitin carboxyl-terminal hydrolase isozyme L5	23.5	25	8	29	8	UCHL5	3.88687e+06	3.66927e+06	1.0593
Q9Y570	Protein phosphatase methylesterase 1	13.704	15	5	23	5	PPME1	4.00149e+06	4.02617e+06	0.99387
Q9Y4W2	Ribosomal biogenesis protein LAS1L	11.453	7	4	6	4	LAS1L	703712	939720	0.748853
Q9Y4R8	Telomere length regulation protein TEL2 homolog	12.738	6	3	10	3	TELO2	559335	590720	0.94687
Q9Y4P3	Transducin beta-like protein 2	11.312	12	4	6	4	TBL2	229300	217383	1.05482
Q9Y4E8	Ubiquitin carboxyl-terminal hydrolase 15	10.848	2	3	6	3	USP15	695201	528134	1.31633
Q9Y4C2	TRPM8 channel-associated factor 1	4.831	2	2	2	2	TCAF1	1.09113e+06	1.04313e+06	1.04602
Q9Y490	Talin-1	33.615	5	8	32	8	TLN1	2.9809e+06	2.14266e+06	1.39122
Q9Y3U8	60S ribosomal protein L36	60.212	37	7	170	7	RPL36	6.9023e+07	6.03005e+07	1.14465
Q9Y3T9	Nucleolar complex protein 2 homolog	15.676	5	4	14	4	NOC2L	8.19876e+06	7.18412e+06	1.14123
Q9Y3R5	Protein dopey-2	23.095	3	6	18	6	DOP1B	4.3115e+06	4.22421e+06	1.02067
Q9Y3E0	Vesicle transport protein GOT1B	8.612	11	2	10	2	GOLT1B	2.26085e+06	2.64069e+06	0.856157
Q9Y3C0	WASH complex subunit 3	12.735	16	2	7	2	WASHC3	1.75901e+06	2.35047e+06	0.748364
Q9Y3B4	Splicing factor 3B subunit 6	9.609	27	3	10	3	SF3B6	749562	771258	0.971869
Q9Y3A5	Ribosome maturation protein SBDS	10.337	18	4	13	4	SBDS	1.66645e+06	1.72511e+06	0.965992
Q9Y383	Putative RNA-binding protein Luc7-like 2	41.98	24	9	93	6	LUC7L2	1.98009e+07	1.84082e+07	1.07565
Q9Y365	START domain-containing protein 10	44.869	42	9	90	9	STARD10	8.24899e+06	7.22681e+06	1.14144
Q9Y333	U6 snRNA-associated Sm-like protein LSm2	13.672	60	4	11	4	LSM2	1.34916e+06	1.54213e+06	0.87487
Q9Y316	Protein MEMO1	11.269	10	2	6	2	MEMO1	595245	398516	1.49365
Q9Y2X3	Nucleolar protein 58	18.63	15	6	17	6	NOP58	1.6453e+06	1.36138e+06	1.20855
Q9Y2W1	Thyroid hormone receptor-associated protein 3	24.943	10	8	26	8	THRAP3	2.98345e+06	2.85255e+06	1.04589
Q9Y2B0	Protein canopy homolog 2	19.095	38	5	9	5	CNPY2	7.16446e+06	7.10475e+06	1.00841
Q9Y295	Developmentally-regulated GTP-binding protein 1	25.528	19	5	23	5	DRG1	1.07354e+06	1.22017e+06	0.879825
Q9Y285	Phenylalanine--tRNA ligase alpha subunit	16.606	12	6	16	6	FARSA	468285	330034	1.4189
Q9Y277	Voltage-dependent anion-selective channel protein 3	31.093	25	6	22	5	VDAC3	3.53493e+07	3.35534e+07	1.05353
Q9Y266	Nuclear migration protein nudC	15.382	18	5	12	5	NUDC	2.53641e+06	1.82918e+06	1.38664
Q9Y265	RuvB-like 1	61.197	36	12	84	12	RUVBL1	7.90744e+06	7.62469e+06	1.03708
Q9Y262	Eukaryotic translation initiation factor 3 subunit L	100.215	35	20	117	20	EIF3L	2.00075e+07	1.95927e+07	1.02117
Q9Y230	RuvB-like 2	35.819	28	12	44	12	RUVBL2	4.22188e+06	4.44275e+06	0.950285
Q9Y224	RNA transcription, translation and transport factor protein	20.518	34	5	12	5	RTRAF	1.5586e+06	1.7575e+06	0.886827
Q9UQE7	Structural maintenance of chromosomes protein 3	5.765	2	2	4	2	SMC3	365096	432684	0.843795
Q9UQ80	Proliferation-associated protein 2G4	53.891	38	13	99	13	PA2G4	1.61574e+07	1.64497e+07	0.982234
Q9UQ35	Serine/arginine repetitive matrix protein 2	240.817	23	49	352	49	SRRM2	3.8596e+07	3.71253e+07	1.03961
Q9UPN9	E3 ubiquitin-protein ligase TRIM33	37.148	11	11	32	11	TRIM33	1.02699e+07	1.09527e+07	0.937665
Q9UP83	Conserved oligomeric Golgi complex subunit 5	9.309	4	3	10	3	COG5	441417	338495	1.30406
Q9UNQ2	Probable dimethyladenosine transferase	7.706	10	3	4	3	DIMT1	861878	1.02623e+06	0.839851
Q9UNM6	26S proteasome non-ATPase regulatory subunit 13	36.27	31	11	41	11	PSMD13	5.80224e+06	5.77182e+06	1.00527
Q9UN86	Ras GTPase-activating protein-binding protein 2	19.831	16	6	15	5	G3BP2	438506	310452	1.41248
Q9UN81	LINE-1 retrotransposable element ORF1 protein	8.566	9	2	7	2	L1RE1	1.45155e+06	1.50827e+06	0.962391
Q9UMS4	Pre-mRNA-processing factor 19	27.079	20	7	40	7	PRPF19	3.86479e+06	3.77264e+06	1.02443
Q9UM54	Unconventional myosin-VI	10.552	3	4	6	4	MYO6	1.86262e+06	1.92143e+06	0.969391
Q9ULD0	2-oxoglutarate dehydrogenase-like, mitochondrial	5.093	2	2	7	2	OGDHL	737740	688598	1.07137
Q9ULC4	Malignant T-cell-amplified sequence 1	24.919	51	7	20	7	MCTS1	1.63664e+06	1.32692e+06	1.23341
Q9ULA0	Aspartyl aminopeptidase	74.149	29	10	113	10	DNPEP	1.68271e+07	1.57058e+07	1.07139
Q9UL46	Proteasome activator complex subunit 2	83.485	58	12	115	12	PSME2	7.21127e+07	6.97739e+07	1.03352
Q9UL25	Ras-related protein Rab-21	32.233	34	6	42	6	RAB21	4.15245e+06	3.67778e+06	1.12906
Q9UKY7	Protein CDV3 homolog	4.834	6	2	6	2	CDV3	3.20362e+06	3.84417e+06	0.833371
Q9UKV3	Apoptotic chromatin condensation inducer in the nucleus	18.506	5	5	26	5	ACIN1	2.7445e+07	3.02106e+07	0.908456
Q9UKS6	Protein kinase C and casein kinase substrate in neurons protein 3	5.255	5	2	6	2	PACSIN3	629525	810414	0.776795
Q9UKR5	Ergosterol biosynthetic protein 28 homolog	8.217	21	3	10	3	ERG28	1.72998e+07	1.39937e+07	1.23626
Q9UKM9	RNA-binding protein Raly	17.003	19	6	24	6	RALY	3.37147e+06	2.85108e+06	1.18253
Q9UKL0	REST corepressor 1	12.169	10	4	10	4	RCOR1	908920	709911	1.28033
Q9UKK9	ADP-sugar pyrophosphatase	6.701	10	2	11	2	NUDT5	1.77204e+06	1.98692e+06	0.891853
Q9UKF6	Cleavage and polyadenylation specificity factor subunit 3	7.483	4	3	5	3	CPSF3	681981	537352	1.26915
Q9UJX3	Anaphase-promoting complex subunit 7	22.595	9	5	20	5	ANAPC7	1.18601e+07	1.17179e+07	1.01213
Q9UJU6	Drebrin-like protein	8.712	10	3	7	3	DBNL	802645	873728	0.918644
Q9UJ70	N-acetyl-D-glucosamine kinase	12.089	15	4	15	4	NAGK	2.6481e+06	2.48767e+06	1.06449
Q9UIC8	Leucine carboxyl methyltransferase 1	11.033	9	2	15	2	LCMT1	2.9116e+06	2.10845e+06	1.38092
Q9UI30	Multifunctional methyltransferase subunit TRM112-like protein	13.758	31	3	13	3	TRMT112	1.3325e+06	1.62022e+06	0.822417
Q9UHX1	Poly(U)-binding-splicing factor PUF60	18.68	12	6	11	6	PUF60	1.83326e+06	1.50469e+06	1.21837
Q9UHV9	Prefoldin subunit 2	12.487	23	3	15	3	PFDN2	3.65774e+06	3.73764e+06	0.978621
Q9UHQ1	Nuclear prelamin A recognition factor	20.142	16	6	11	6	NARF	451717	493708	0.914948
Q9UHI6	Probable ATP-dependent RNA helicase DDX20	8.099	6	3	4	3	DDX20	485180	519166	0.934537
Q9UHD8	Septin-9	43.309	24	12	56	12	SEPTIN9	5.15264e+06	6.37915e+06	0.807731
Q9UHB6	LIM domain and actin-binding protein 1	5.91	4	2	4	2	LIMA1	1.9227e+06	1.53329e+06	1.25397
Q9UGI8	Testin	7.971	9	4	6	4	TES	414994	597341	0.694735
Q9UG63	ATP-binding cassette sub-family F member 2	31.104	17	9	26	9	ABCF2	7.71072e+06	6.6873e+06	1.15304
Q9UDW1	Cytochrome b-c1 complex subunit 9	10.903	54	3	19	3	UQCR10	6.65915e+06	7.13376e+06	0.933469
Q9UBV8	Peflin	14.307	23	4	14	4	PEF1	799147	849973	0.940203
Q9UBT2	SUMO-activating enzyme subunit 2	10.183	6	4	7	4	UBA2	3.90712e+06	3.43821e+06	1.13638
Q9UBQ7	Glyoxylate reductase/hydroxypyruvate reductase	9.465	11	3	7	3	GRHPR	345107	347317	0.993635
Q9UBQ5	Eukaryotic translation initiation factor 3 subunit K	7.498	12	2	10	2	EIF3K	756494	552693	1.36874
Q9UBQ0	Vacuolar protein sorting-associated protein 29	12.227	25	4	16	4	VPS29	1.44509e+06	1.5383e+06	0.939411
Q9UBM7	7-dehydrocholesterol reductase	25.275	17	7	47	7	DHCR7	7.21121e+06	5.61296e+06	1.28474
Q9UBF2	Coatomer subunit gamma-2	21.208	9	6	18	4	COPG2	621272	807079	0.769779
Q9UBE0	SUMO-activating enzyme subunit 1	11.215	12	4	15	4	SAE1	1.17592e+06	1.39905e+06	0.840514
Q9P2X3	Protein IMPACT	20.487	24	6	11	6	IMPACT	485259	411401	1.17953
Q9P2N5	RNA-binding protein 27	4.983	2	2	3	2	RBM27	339400	277936	1.22114
Q9P2J5	Leucine--tRNA ligase, cytoplasmic	97.157	28	26	125	26	LARS1	1.80463e+07	1.79229e+07	1.00688
Q9P2I0	Cleavage and polyadenylation specificity factor subunit 2	4.624	3	2	3	2	CPSF2	1.9154e+06	1.68728e+06	1.1352
Q9P289	Serine/threonine-protein kinase 26	11.227	12	4	4	4	STK26	516270	487531	1.05895
Q9P287	BRCA2 and CDKN1A-interacting protein	9.66	10	2	9	2	BCCIP	754959	762364	0.990286
Q9P258	Protein RCC2	85.322	37	21	120	21	RCC2	1.19987e+07	1.11005e+07	1.08092
Q9P1F3	Costars family protein ABRACL	5.103	36	2	3	2	ABRACL	1.72734e+06	1.97107e+06	0.876346
Q9P0S3	ORM1-like protein 1	6.73	17	2	2	2	ORMDL1	341937	378616	0.903122
Q9P0L0	Vesicle-associated membrane protein-associated protein A	20.419	17	3	25	3	VAPA	1.6919e+06	1.44238e+06	1.17299
Q9P035	Very-long-chain (3R)-3-hydroxyacyl-CoA dehydratase 3	29.29	26	7	38	7	HACD3	4.83742e+06	5.86397e+06	0.824939
Q9NZT2	Opioid growth factor receptor	29.231	17	10	23	10	OGFR	1.6586e+06	1.44462e+06	1.14812
Q9NZL9	Methionine adenosyltransferase 2 subunit beta	5.302	7	2	6	2	MAT2B	526653	616421	0.854373
Q9NZL4	Hsp70-binding protein 1	27.241	26	7	20	7	HSPBP1	3.27571e+06	2.66978e+06	1.22696
Q9NZJ7	Mitochondrial carrier homolog 1	4.897	5	2	3	2	MTCH1	787080	868988	0.905743
Q9NZD2	Glycolipid transfer protein	6.263	11	2	10	2	GLTP	1.35333e+06	1.09153e+06	1.23985
Q9NZB2	Constitutive coactivator of PPAR-gamma-like protein 1	111.5	33	27	78	27	FAM120A	2.43736e+07	2.64092e+07	0.922921
Q9NZ01	Very-long-chain enoyl-CoA reductase	17.629	13	4	31	4	TECR	1.12677e+07	9.57788e+06	1.17643
Q9NYU2	UDP-glucose:glycoprotein glucosyltransferase 1	6.76	2	2	8	2	UGGT1	8.00626e+06	6.54472e+06	1.22332
Q9NYL9	Tropomodulin-3	20.599	24	6	33	6	TMOD3	8.14512e+06	6.77637e+06	1.20199
Q9NYJ1	Cytochrome c oxidase assembly factor 4 homolog, mitochondrial	7.099	36	2	8	2	COA4	2.19661e+06	3.23499e+06	0.679017
Q9NYF8	Bcl-2-associated transcription factor 1	18.387	6	5	27	5	BCLAF1	4.36888e+06	6.21995e+06	0.702399
Q9NY33	Dipeptidyl peptidase 3	44.289	23	11	39	11	DPP3	2.41602e+06	2.76801e+06	0.872836
Q9NXW9	Alpha-ketoglutarate-dependent dioxygenase alkB homolog 4	17.631	21	6	16	6	ALKBH4	1.41494e+07	1.3189e+07	1.07282
Q9NXH9	tRNA (guanine(26)-N(2))-dimethyltransferase	6.586	5	3	5	3	TRMT1	779328	640008	1.21768
Q9NXG2	THUMP domain-containing protein 1	27.178	20	8	24	8	THUMPD1	7.07177e+06	5.86739e+06	1.20527
Q9NXF1	Testis-expressed protein 10	8.639	3	2	4	2	TEX10	843078	582841	1.4465
Q9NX63	MICOS complex subunit MIC19	7.7	9	3	5	3	CHCHD3	4.29549e+06	4.37266e+06	0.982351
Q9NX58	Cell growth-regulating nucleolar protein	15.379	16	3	6	3		313493	303874	1.03165
Q9NVP1	ATP-dependent RNA helicase DDX18	50.133	16	9	80	9	DDX18	1.62308e+07	1.6782e+07	0.967153
Q9NVA2	Septin-11	7.472	8	3	9	2	SEPTIN11	359709	399863	0.899579
Q9NTK5	Obg-like ATPase 1	61.022	41	13	72	13	OLA1	1.152e+07	1.00237e+07	1.14928
Q9NTI5	Sister chromatid cohesion protein PDS5 homolog B	8.378	3	4	4	3	PDS5B	885710	827140	1.07081
Q9NSE4	Isoleucine--tRNA ligase, mitochondrial	5.177	2	2	4	2	IARS2	712658	480416	1.48342
Q9NSD9	Phenylalanine--tRNA ligase beta subunit	42.412	24	14	54	14	FARSB	7.54407e+06	7.15166e+06	1.05487
Q9NRZ9	Lymphoid-specific helicase	6.469	3	2	3	2	HELLS	235093	324675	0.724089
Q9NRX2	39S ribosomal protein L17, mitochondrial	12.769	14	2	6	2	MRPL17	1.72882e+06	1.58885e+06	1.08809
Q9NRX1	RNA-binding protein PNO1	4.556	10	2	3	2	PNO1	456131	514752	0.886118
Q9NRR5	Ubiquilin-4	26.563	14	6	21	5	UBQLN4	9.30332e+06	8.8619e+06	1.04981
Q9NRN7	L-aminoadipate-semialdehyde dehydrogenase-phosphopantetheinyl transferase	13.833	14	4	12	4	AASDHPPT	2.87916e+06	3.30222e+06	0.871884
Q9NRF9	DNA polymerase epsilon subunit 3	4.275	16	2	2	2	POLE3	226076	284953	0.793379
Q9NR56	Muscleblind-like protein 1	9.972	13	4	10	4	MBNL1	1.21981e+06	1.3631e+06	0.894879
Q9NR31	GTP-binding protein SAR1a	13.621	22	3	25	2	SAR1A	2.12381e+06	1.7794e+06	1.19355
Q9NR30	Nucleolar RNA helicase 2	76.435	34	20	109	18	DDX21	1.44799e+07	1.79449e+07	0.80691
Q9NQT5	Exosome complex component RRP40	14.716	11	3	9	3	EXOSC3	6.5977e+06	5.48413e+06	1.20305
Q9NQT4	Exosome complex component RRP46	8.459	8	2	9	2	EXOSC5	726923	688240	1.05621
Q9NQR4	Omega-amidase NIT2	180.636	86	22	193	22	NIT2	9.40151e+06	6.59742e+06	1.42503
Q9NQP4	Prefoldin subunit 4	4.837	17	2	2	2	PFDN4	1.89505e+06	1.94553e+06	0.974053
Q9NQC3	Reticulon-4	27.217	5	5	41	5	RTN4	4.75131e+07	4.57773e+07	1.03792
Q9NQ88	Fructose-2,6-bisphosphatase TIGAR	10.909	13	3	12	3	TIGAR	2.63539e+06	2.91182e+06	0.905066
Q9NP73	Putative bifunctional UDP-N-acetylglucosamine transferase and deubiquitinase ALG13	7.643	3	2	4	2	ALG13	1.2046e+06	1.52849e+06	0.788101
Q9NNW7	Thioredoxin reductase 2, mitochondrial	11.278	9	3	12	2	TXNRD2	1.72802e+06	1.49594e+06	1.15514
Q9HDC9	Adipocyte plasma membrane-associated protein	25.467	22	9	36	9	APMAP	1.67063e+07	1.63767e+07	1.02013
Q9HCC0	Methylcrotonoyl-CoA carboxylase beta chain, mitochondrial	55.02	33	14	55	14	MCCC2	1.54907e+07	1.59032e+07	0.974063
Q9HC38	Glyoxalase domain-containing protein 4	30.835	37	9	49	9	GLOD4	5.54723e+06	4.93625e+06	1.12377
Q9HC35	Echinoderm microtubule-associated protein-like 4	12.164	3	2	13	2	EML4	343530	390315	0.880135
Q9HB71	Calcyclin-binding protein	57.312	60	12	62	12	CACYBP	2.62273e+07	2.54256e+07	1.03153
Q9HB07	MYG1 exonuclease	10.231	12	4	12	4	MYG1	911310	809504	1.12576
Q9HAV7	GrpE protein homolog 1, mitochondrial	22.638	26	6	23	6	GRPEL1	1.01402e+07	9.19162e+06	1.1032
Q9HAV4	Exportin-5	143.161	32	31	133	31	XPO5	1.13952e+07	1.28275e+07	0.88834
Q9HA64	Ketosamine-3-kinase	7.547	8	2	5	2	FN3KRP	1.81525e+06	1.32203e+06	1.37307
Q9H910	Jupiter microtubule associated homolog 2	10.134	21	3	6	3	JPT2	2.18869e+06	2.3941e+06	0.914199
Q9H857	5'-nucleotidase domain-containing protein 2	8.14	7	3	3	3	NT5DC2	1.20439e+06	1.3876e+06	0.867969
Q9H845	Complex I assembly factor ACAD9, mitochondrial	52.888	24	11	26	11	ACAD9	5.01281e+07	5.54498e+07	0.904026
Q9H814	Phosphorylated adapter RNA export protein	6.809	5	2	7	2	PHAX	1.21204e+06	1.10918e+06	1.09274
Q9H7Z7	Prostaglandin E synthase 2	29.384	30	9	19	9	PTGES2	2.35115e+07	2.32751e+07	1.01016
Q9H773	dCTP pyrophosphatase 1	15.393	29	5	21	5	DCTPP1	4.8581e+06	3.93293e+06	1.23524
Q9H4A5	Golgi phosphoprotein 3-like	8.766	9	3	3	2	GOLPH3L	875379	626937	1.39628
Q9H4A4	Aminopeptidase B	99.203	40	20	122	20	RNPEP	1.0762e+07	1.15408e+07	0.932517
Q9H444	Charged multivesicular body protein 4b	15.6	22	4	8	4	CHMP4B	1.18806e+06	856617	1.38692
Q9H3U1	Protein unc-45 homolog A	50.876	17	13	34	13	UNC45A	1.21164e+07	1.08948e+07	1.11213
Q9H3K6	BolA-like protein 2	14.542	50	4	30	4	BOLA2; BOLA2B	3.41949e+07	3.03312e+07	1.12739
Q9H307	Pinin	28.064	12	9	44	9	PNN	1.56664e+07	1.67981e+07	0.93263
Q9H2U2	Inorganic pyrophosphatase 2, mitochondrial	23.691	22	6	23	5	PPA2	3.65645e+07	3.81296e+07	0.958955
Q9H2U1	ATP-dependent DNA/RNA helicase DHX36	9.428	4	4	8	4	DHX36	1.97661e+06	2.69974e+06	0.732146
Q9H2J4	Phosducin-like protein 3	5.745	10	2	6	2	PDCL3	419189	411461	1.01878
Q9H0W8	Protein SMG9	27.509	18	7	18	7	SMG9	1.60274e+07	1.6252e+07	0.986183
Q9H0U4	Ras-related protein Rab-1B	35.03	43	7	35	2	RAB1B	8.97449e+06	8.99378e+06	0.997854
Q9H0R4	Haloacid dehalogenase-like hydrolase domain-containing protein 2	3.258	8	2	6	2	HDHD2	675972	458324	1.47488
Q9H0D6	5'-3' exoribonuclease 2	23.662	10	8	17	8	XRN2	2.67806e+06	2.60184e+06	1.02929
Q9H0A0	RNA cytidine acetyltransferase	14.713	6	6	13	6	NAT10	1.83998e+06	2.22304e+06	0.827685
Q9GZT3	SRA stem-loop-interacting RNA-binding protein, mitochondrial	8.864	31	3	10	3	SLIRP	3.93566e+06	3.55578e+06	1.10683
Q9GZR7	ATP-dependent RNA helicase DDX24	11.498	5	4	5	4	DDX24	931541	1.0095e+06	0.922772
Q9GZN8	UPF0687 protein C20orf27	7.424	23	3	7	3	C20orf27	1.10357e+06	1.21156e+06	0.91087
Q9C0C9	(E3-independent) E2 ubiquitin-conjugating enzyme	41.652	14	13	44	13	UBE2O	1.46364e+06	1.2815e+06	1.14213
Q9C005	Protein dpy-30 homolog	21.362	45	3	12	3	DPY30	9.98788e+06	7.15465e+06	1.396
Q9BZZ5	Apoptosis inhibitor 5	42.814	24	10	28	10	API5	2.7145e+06	3.54439e+06	0.765857
Q9BZE4	GTP-binding protein 4	23.846	15	9	29	9	GTPBP4	1.89841e+06	1.52882e+06	1.24175
Q9BYJ9	YTH domain-containing family protein 1	5.25	4	2	3	2	YTHDF1	299512	290014	1.03275
Q9BY44	Eukaryotic translation initiation factor 2A	31.146	22	10	31	10	EIF2A	3.52155e+06	3.20919e+06	1.09734
Q9BXW9	Fanconi anemia group D2 protein	33.343	7	9	24	9	FANCD2	1.88212e+06	2.64807e+06	0.710751
Q9BXS5	AP-1 complex subunit mu-1	13.193	13	5	12	3	AP1M1	705740	713853	0.988634
Q9BXP5	Serrate RNA effector molecule homolog	24.802	11	8	20	8	SRRT	1.68425e+06	1.51337e+06	1.11291
Q9BXJ9	N-alpha-acetyltransferase 15, NatA auxiliary subunit	44.602	19	15	36	15	NAA15	3.75669e+06	3.11758e+06	1.205
Q9BWF3	RNA-binding protein 4	50.025	38	9	46	9	RBM4	7.04692e+06	5.51129e+06	1.27863
Q9BWD1	Acetyl-CoA acetyltransferase, cytosolic	11.461	10	2	9	2	ACAT2	1.06868e+06	1.13221e+06	0.943894
Q9BW61	DET1- and DDB1-associated protein 1	8.381	20	2	10	2	DDA1	2.02451e+07	1.81711e+07	1.11414
Q9BVK6	Transmembrane emp24 domain-containing protein 9	6.579	8	2	5	2	TMED9	2.6558e+06	2.22387e+06	1.19422
Q9BVJ7	Dual specificity protein phosphatase 23	13.301	36	5	13	5	DUSP23	4.76387e+06	4.61211e+06	1.0329
Q9BVC6	Transmembrane protein 109	7.235	9	2	7	2	TMEM109	1.36579e+06	2.02564e+06	0.674253
Q9BV44	THUMP domain-containing protein 3	11.301	8	4	10	4	THUMPD3	1.10087e+06	917155	1.20031
Q9BUQ8	Probable ATP-dependent RNA helicase DDX23	49.501	17	14	72	14	DDX23	3.48195e+07	3.46487e+07	1.00493
Q9BUN8	Derlin-1	17.094	20	5	23	5	DERL1	7.56429e+06	7.97374e+06	0.94865
Q9BUJ2	Heterogeneous nuclear ribonucleoprotein U-like protein 1	24.261	11	7	15	7	HNRNPUL1	1.44573e+06	2.0416e+06	0.708135
Q9BUF5	Tubulin beta-6 chain	79.854	26	13	298	2	TUBB6	1.00743e+07	8.95622e+06	1.12484
Q9BU76	Multiple myeloma tumor-associated protein 2	14.493	18	4	13	4	MMTAG2	715451	581527	1.2303
Q9BTW9	Tubulin-specific chaperone D	28.671	9	8	15	8	TBCD	947733	819282	1.15678
Q9BTE3	Mini-chromosome maintenance complex-binding protein	38.302	16	9	40	9	MCMBP	6.78986e+06	6.97686e+06	0.973197
Q9BT78	COP9 signalosome complex subunit 4	8.94	9	3	4	3	COPS4	645267	460594	1.40094
Q9BT73	Proteasome assembly chaperone 3	7.369	18	2	13	2	PSMG3	1.03939e+06	841866	1.23462
Q9BS40	Latexin	40.678	27	7	81	7	LXN	3.00066e+07	2.9164e+07	1.02889
Q9BS26	Endoplasmic reticulum resident protein 44	9.825	9	4	9	4	ERP44	1.71984e+06	1.62841e+06	1.05615
Q9BRX8	Peroxiredoxin-like 2A	65.509	44	11	81	11	PRXL2A	1.95152e+08	1.91936e+08	1.01675
Q9BRT6	Protein LLP homolog	10.607	29	3	5	3	LLPH	2.3245e+06	2.20478e+06	1.0543
Q9BRJ7	Tudor-interacting repair regulator protein	11.592	23	4	6	4	NUDT16L1	2.74741e+06	2.67554e+06	1.02686
Q9BRF8	Serine/threonine-protein phosphatase CPPED1	5.734	7	2	3	2	CPPED1	402340	316054	1.27301
Q9BRA2	Thioredoxin domain-containing protein 17	51.231	59	6	71	6	TXNDC17	2.02314e+08	1.71906e+08	1.17688
Q9BR76	Coronin-1B	40.693	23	11	86	11	CORO1B	1.02585e+07	1.10188e+07	0.930996
Q9BQG0	Myb-binding protein 1A	70.586	15	16	63	16	MYBBP1A	7.46707e+06	9.89583e+06	0.754567
Q9BQB6	Vitamin K epoxide reductase complex subunit 1	20.022	26	3	19	3	VKORC1	1.13226e+07	1.46252e+07	0.774185
Q9BQ70	Transcription factor 25	18.916	10	7	13	7	TCF25	370442	404305	0.916244
Q9BQ61	Telomerase RNA component interacting RNase	7.447	22	3	11	3	TRIR	2.49721e+06	2.64834e+06	0.942934
Q9BQ52	Zinc phosphodiesterase ELAC protein 2	23.598	12	6	18	6	ELAC2	1.94332e+06	1.93903e+06	1.00221
Q9BPX3	Condensin complex subunit 3	31.989	10	9	30	9	NCAPG	1.56311e+06	1.79954e+06	0.868616
Q99873	Protein arginine N-methyltransferase 1	135.854	44	18	160	15	PRMT1	3.49337e+07	3.26889e+07	1.06867
Q99848	Probable rRNA-processing protein EBP2	20.952	21	5	28	5	EBNA1BP2	1.97425e+06	2.71395e+06	0.727447
Q99832	T-complex protein 1 subunit eta	101.787	52	23	163	23	CCT7	2.39679e+07	2.28144e+07	1.05056
Q99829	Copine-1	10.146	8	3	13	3	CPNE1	2.5835e+06	2.60686e+06	0.991037
Q99757	Thioredoxin, mitochondrial	21.365	22	3	8	3	TXN2	1.27393e+07	1.22931e+07	1.03629
Q99747	Gamma-soluble NSF attachment protein	6.094	8	2	8	2	NAPG	1.28979e+06	955425	1.34996
Q99735	Microsomal glutathione S-transferase 2	8.375	18	2	8	2	MGST2	771766	634738	1.21588
Q99733	Nucleosome assembly protein 1-like 4	17.511	15	4	27	3	NAP1L4	997568	1.03611e+06	0.962805
Q99729	Heterogeneous nuclear ribonucleoprotein A/B	60.685	23	12	70	11	HNRNPAB	1.19889e+08	1.1156e+08	1.07466
Q99714	3-hydroxyacyl-CoA dehydrogenase type-2	41.034	61	9	30	9	HSD17B10	3.06291e+06	3.56035e+06	0.860284
Q99615	DnaJ homolog subfamily C member 7	10.323	7	4	13	4	DNAJC7	1.8562e+06	1.34197e+06	1.38319
Q99613	Eukaryotic translation initiation factor 3 subunit C	165.706	30	33	264	33	EIF3C	2.87698e+07	2.54698e+07	1.12957
Q99611	Selenide, water dikinase 2	3.64	6	2	2	2	SEPHS2	759305	831288	0.913409
Q99584	Protein S100-A13	17.336	34	4	18	4	S100A13	6.68298e+06	6.72932e+06	0.993114
Q99575	Ribonucleases P/MRP protein subunit POP1	39.771	15	12	33	12	POP1	2.42283e+06	2.49633e+06	0.970559
Q99543	DnaJ homolog subfamily C member 2	9.707	7	3	8	3	DNAJC2	1.42008e+06	1.31362e+06	1.08105
Q99497	Parkinson disease protein 7	57.461	65	11	46	11	PARK7	3.25713e+07	3.03823e+07	1.07205
Q99471	Prefoldin subunit 5	14.6	39	4	5	4	PFDN5	397451	553690	0.717823
Q99460	26S proteasome non-ATPase regulatory subunit 1	40.062	14	10	35	10	PSMD1	5.41823e+06	6.11839e+06	0.885564
Q99436	Proteasome subunit beta type-7	7.559	5	2	14	2	PSMB7	2.53706e+06	1.92531e+06	1.31774
Q99426	Tubulin-folding cofactor B	7.475	11	3	10	3	TBCB	2.44229e+06	1.64053e+06	1.48872
Q96T76	MMS19 nucleotide excision repair protein homolog	176.248	46	35	134	35	MMS19	1.02371e+07	1.08729e+07	0.941521
Q96SY0	Integrator complex subunit 14	6.097	4	2	6	2	INTS14	588202	465078	1.26474
Q96SB4	SRSF protein kinase 1	15.942	11	5	14	4	SRPK1	462072	365972	1.26259
Q96RS6	NudC domain-containing protein 1	49.764	24	11	41	11	NUDCD1	2.7226e+06	2.55412e+06	1.06596
Q96RQ3	Methylcrotonoyl-CoA carboxylase subunit alpha, mitochondrial	110.043	41	23	148	23	MCCC1	2.23996e+07	1.99463e+07	1.12299
Q96QR8	Transcriptional activator protein Pur-beta	5.834	6	2	7	2	PURB	2.26211e+06	1.81801e+06	1.24428
Q96QK1	Vacuolar protein sorting-associated protein 35	51.942	19	12	39	12	VPS35	5.39284e+06	5.60528e+06	0.962099
Q96Q11	CCA tRNA nucleotidyltransferase 1, mitochondrial	17.924	17	7	18	7	TRNT1	4.04957e+06	4.95953e+06	0.816524
Q96PK6	RNA-binding protein 14	12.049	8	4	10	4	RBM14	737061	520894	1.41499
Q96P11	28S rRNA (cytosine-C(5))-methyltransferase	9.56	7	3	11	3	NSUN5	393177	370093	1.06237
Q96LA8	Protein arginine N-methyltransferase 6	4.823	6	2	5	2	PRMT6	2.39903e+06	2.55674e+06	0.938316
Q96KP4	Cytosolic non-specific dipeptidase	21.217	25	9	16	9	CNDP2	2.71948e+06	2.25405e+06	1.20649
Q96K76	Ubiquitin carboxyl-terminal hydrolase 47	12.008	3	3	13	3	USP47	301236	326164	0.923574
Q96IX5	ATP synthase membrane subunit K, mitochondrial	7.897	45	2	6	2	ATP5MK	2.4246e+06	2.54413e+06	0.953019
Q96IU4	Protein ABHD14B	13.838	20	4	13	4	ABHD14B	1.62304e+06	1.89907e+06	0.854652
Q96I99	Succinate--CoA ligase [GDP-forming] subunit beta, mitochondrial	7.546	5	2	6	2	SUCLG2	1.88985e+06	1.93419e+06	0.977075
Q96I24	Far upstream element-binding protein 3	10.919	8	4	31	3	FUBP3	398720	452533	0.881084
Q96HY7	Probable 2-oxoglutarate dehydrogenase E1 component DHKTD1, mitochondrial	6.819	3	3	4	3	DHTKD1	472982	585637	0.807637
Q96HS1	Serine/threonine-protein phosphatase PGAM5, mitochondrial	4.453	9	2	9	2	PGAM5	1.26142e+06	1.04407e+06	1.20819
Q96HE7	ERO1-like protein alpha	31.135	21	8	23	8	ERO1A	8.26112e+06	8.56212e+06	0.964845
Q96GQ5	RUS family member 1	4.2	4	2	3	2	RUSF1	350370	420990	0.832253
Q96FX7	tRNA (adenine(58)-N(1))-methyltransferase catalytic subunit TRMT61A	26.519	21	4	31	4	TRMT61A	1.81063e+07	1.84074e+07	0.983641
Q96FW1	Ubiquitin thioesterase OTUB1	34.137	31	7	42	7	OTUB1	9.16028e+06	8.86084e+06	1.03379
Q96FV9	THO complex subunit 1	8.533	4	3	8	3	THOC1	1.63241e+06	1.5478e+06	1.05466
Q96FQ6	Protein S100-A16	26.831	67	6	36	6	S100A16	1.55636e+07	1.37604e+07	1.13104
Q96FJ2	Dynein light chain 2, cytoplasmic	20.105	34	4	27	4	DYNLL2	3.08559e+06	2.95747e+06	1.04332
Q96F86	Enhancer of mRNA-decapping protein 3	11.832	9	3	6	3	EDC3	833794	690599	1.20735
Q96EK6	Glucosamine 6-phosphate N-acetyltransferase	20.799	49	5	21	5	GNPNAT1	2.25e+06	3.06778e+06	0.733432
Q96EK5	KIF-binding protein	29.853	18	8	14	8	KIFBP	359641	345752	1.04017
Q96DG6	Carboxymethylenebutenolidase homolog	11.449	16	4	18	4	CMBL	1.49752e+06	1.14269e+06	1.31052
Q96D46	60S ribosomal export protein NMD3	14.273	8	5	22	5	NMD3	2.20485e+06	1.8484e+06	1.19284
Q96CW1	AP-2 complex subunit mu	4.265	4	2	6	2	AP2M1	808492	693137	1.16643
Q96CP2	FLYWCH family member 2	9.947	41	4	11	4	FLYWCH2	1.41413e+06	1.38331e+06	1.02228
Q96CN7	Isochorismatase domain-containing protein 1	36.905	34	7	31	7	ISOC1	3.46208e+06	4.80621e+06	0.720335
Q96C90	Protein phosphatase 1 regulatory subunit 14B	7.222	10	2	3	2	PPP1R14B	1.16007e+06	995220	1.16564
Q96C19	EF-hand domain-containing protein D2	20.458	27	6	12	6	EFHD2	3.95559e+06	3.6593e+06	1.08097
Q96AY3	Peptidyl-prolyl cis-trans isomerase FKBP10	4.242	4	2	4	2	FKBP10	558094	543304	1.02722
Q96AG4	Leucine-rich repeat-containing protein 59	15.993	25	6	18	6	LRRC59	2.44696e+06	2.85917e+06	0.855829
Q96AE4	Far upstream element-binding protein 1	30.326	17	10	69	7	FUBP1	7.73466e+06	7.51342e+06	1.02945
Q96AB3	Isochorismatase domain-containing protein 2	52.126	66	8	37	8	ISOC2	4.10539e+06	3.54554e+06	1.1579
Q96A65	Exocyst complex component 4	16.839	7	5	13	5	EXOC4	1.47557e+07	1.59161e+07	0.927093
Q92973	Transportin-1	27.255	10	7	21	6	TNPO1	1.53586e+06	1.21958e+06	1.25934
Q92945	Far upstream element-binding protein 2	52.499	26	14	81	12	KHSRP	1.37663e+07	1.35255e+07	1.01781
Q92900	Regulator of nonsense transcripts 1	47.292	15	15	54	15	UPF1	7.32733e+06	6.00513e+06	1.22018
Q92841	Probable ATP-dependent RNA helicase DDX17	75.327	28	19	112	11	DDX17	6.42994e+06	6.0857e+06	1.05656
Q92747	Actin-related protein 2/3 complex subunit 1A	10.223	12	3	8	2	ARPC1A	1.08473e+06	990602	1.09502
Q92688	Acidic leucine-rich nuclear phosphoprotein 32 family member B	48.969	33	10	87	6	ANP32B	2.2092e+07	1.81648e+07	1.2162
Q92667	A-kinase anchor protein 1, mitochondrial	6.256	4	3	7	3	AKAP1	598502	768229	0.779067
Q92621	Nuclear pore complex protein Nup205	7.333	2	3	8	3	NUP205	768415	789670	0.973084
Q92616	eIF-2-alpha kinase activator GCN1	404.942	40	88	431	88		2.51333e+07	2.62272e+07	0.958292
Q92600	CCR4-NOT transcription complex subunit 9	8.58	11	2	8	2	CNOT9	1.12231e+06	1.18153e+06	0.949882
Q92598	Heat shock protein 105 kDa	102.82	35	24	95	22	HSPH1	1.30891e+07	1.11246e+07	1.17659
Q92552	28S ribosomal protein S27, mitochondrial	7.784	8	3	7	3	MRPS27	1.46451e+06	1.39774e+06	1.04777
Q92544	Transmembrane 9 superfamily member 4	7.006	4	2	3	2	TM9SF4	484775	460480	1.05276
Q92499	ATP-dependent RNA helicase DDX1	53.905	25	14	60	14	DDX1	5.69866e+06	4.00014e+06	1.42461
Q92466	DNA damage-binding protein 2	29.1	22	9	27	9	DDB2	4.40001e+06	4.35379e+06	1.01061
Q8WXF1	Paraspeckle component 1	16.522	15	5	8	5	PSPC1	1.06139e+06	1.27816e+06	0.830403
Q8WW12	PEST proteolytic signal-containing nuclear protein	5.981	15	2	3	2	PCNP	1.01634e+06	1.00583e+06	1.01045
Q8WUY1	Protein THEM6	22.526	37	6	17	6	THEM6	2.31429e+06	2.28777e+06	1.01159
Q8WUM4	Programmed cell death 6-interacting protein	188.388	51	40	290	40	PDCD6IP	1.50154e+08	1.25509e+08	1.19636
Q8WUH6	Transmembrane protein 263	44.457	58	5	71	5	TMEM263	1.9772e+06	1.41758e+06	1.39478
Q8TEX9	Importin-4	75.447	20	17	83	17	IPO4	1.08482e+07	1.35862e+07	0.798473
Q8TDN6	Ribosome biogenesis protein BRX1 homolog	27.693	25	8	31	8	BRIX1	4.21272e+06	4.42472e+06	0.952087
Q8TBQ9	Protein kish-A	4.182	25	2	10	2	TMEM167A	4.23424e+06	4.05279e+06	1.04477
Q8TBF2	Prostamide/prostaglandin F synthase	7.213	15	2	2	2	PRXL2B	1.64275e+06	1.60172e+06	1.02561
Q8TBB5	Kelch domain-containing protein 4	6.187	4	2	8	2	KLHDC4	578515	561027	1.03117
Q8NFW8	N-acylneuraminate cytidylyltransferase	12.868	6	2	22	2	CMAS	2.58084e+06	1.90701e+06	1.35335
Q8NFA0	Ubiquitin carboxyl-terminal hydrolase 32	26.227	6	7	17	7	USP32	1.07307e+06	1.14388e+06	0.938098
Q8NEZ5	F-box only protein 22	29.769	24	8	31	8	FBXO22	2.31924e+06	2.24873e+06	1.03136
Q8NEC7	Glutathione S-transferase C-terminal domain-containing protein	11.557	4	2	6	2	GSTCD	3.33237e+06	3.26486e+06	1.02068
Q8NE71	ATP-binding cassette sub-family F member 1	44.776	16	10	44	10	ABCF1	3.39741e+06	3.87638e+06	0.876439
Q8NDH3	Probable aminopeptidase NPEPL1	23.175	15	7	22	7	NPEPL1	3.33162e+06	2.70111e+06	1.23343
Q8NCW5	NAD(P)H-hydrate epimerase	16.412	23	4	21	4	NAXE	2.05633e+06	1.52388e+06	1.34941
Q8NCA5	Protein FAM98A	17.872	14	5	20	5	FAM98A	741958	549121	1.35117
Q8NC51	Plasminogen activator inhibitor 1 RNA-binding protein	42.991	24	11	41	11	SERBP1	7.14603e+06	8.58479e+06	0.832406
Q8NBX0	Saccharopine dehydrogenase-like oxidoreductase	15.089	11	4	10	4	SCCPDH	891051	1.30683e+06	0.68184
Q8NBS9	Thioredoxin domain-containing protein 5	53.83	36	14	71	14	TXNDC5	8.04271e+07	7.46292e+07	1.07769
Q8N8N7	Prostaglandin reductase 2	18.897	11	4	13	4	PTGR2	1.29773e+06	1.39693e+06	0.928989
Q8N6R0	eEF1A lysine and N-terminal methyltransferase	5.75	5	3	3	3	METTL13	338259	287281	1.17745
Q8N6H7	ADP-ribosylation factor GTPase-activating protein 2	9.444	7	3	5	3	ARFGAP2	1.08945e+06	1.02081e+06	1.06724
Q8N684	Cleavage and polyadenylation specificity factor subunit 7	4.506	3	2	7	2	CPSF7	1.37924e+06	1.31354e+06	1.05002
Q8N5I9	NOP protein chaperone 1	7.484	15	2	3	2	NOPCHAP1	809679	874488	0.925889
Q8N5F7	NF-kappa-B-activating protein	19.876	12	5	19	5	NKAP	1.73841e+06	1.84778e+06	0.94081
Q8N4V1	ER membrane protein complex subunit 5	11.5	24	2	11	2	MMGT1	3.01378e+06	3.59927e+06	0.83733
Q8N335	Glycerol-3-phosphate dehydrogenase 1-like protein	4.885	5	2	2	2	GPD1L	2.32107e+06	2.12825e+06	1.0906
Q8N1G4	Leucine-rich repeat-containing protein 47	31.114	20	8	23	8	LRRC47	1.17842e+06	792952	1.48612
Q8N1G2	Cap-specific mRNA (nucleoside-2'-O-)-methyltransferase 1	13.821	8	6	7	6	CMTR1	787996	756758	1.04128
Q8N1F7	Nuclear pore complex protein Nup93	8.501	5	3	10	3	NUP93	3.37124e+06	2.73907e+06	1.23079
Q8N163	Cell cycle and apoptosis regulator protein 2	34.29	15	12	46	12	CCAR2	4.11535e+06	2.75281e+06	1.49496
Q8N0U8	Vitamin K epoxide reductase complex subunit 1-like protein 1	39.409	33	6	57	6	VKORC1L1	1.89793e+07	2.51421e+07	0.75488
Q8IZP2	Putative protein FAM10A4	14.328	18	4	26	4	ST13P4	3.05354e+06	2.5602e+06	1.1927
Q8IZL8	Proline-, glutamic acid- and leucine-rich protein 1	30.69	11	8	22	8	PELP1	1.22387e+07	1.32658e+07	0.922574
Q8IZ69	tRNA (uracil-5-)-methyltransferase homolog A	9.792	5	3	4	3	TRMT2A	5.59913e+07	5.23745e+07	1.06906
Q8IYB3	Serine/arginine repetitive matrix protein 1	48.137	14	10	55	10	SRRM1	4.94945e+06	3.91506e+06	1.26421
Q8IWZ3	Ankyrin repeat and KH domain-containing protein 1	6.34	1	3	5	3	ANKHD1	884888	660889	1.33894
Q8IV50	LysM and putative peptidoglycan-binding domain-containing protein 2	10.489	10	2	11	2	LYSMD2	3.01951e+06	3.13951e+06	0.961777
Q8IV36	Protein HID1	11.8	6	4	15	4	HID1	2.37647e+06	2.89681e+06	0.820376
Q86Y56	Dynein axonemal assembly factor 5	18.885	8	7	18	7	DNAAF5	597838	799741	0.74754
Q86X55	Histone-arginine methyltransferase CARM1	18.452	14	5	16	5	CARM1	2.22724e+06	1.8208e+06	1.22322
Q86WQ0	Nuclear receptor 2C2-associated protein	15.084	23	3	16	3	NR2C2AP	3.79827e+07	3.59439e+07	1.05672
Q86WB0	Nuclear-interacting partner of ALK	14.259	7	3	16	3	ZC3HC1	2.96777e+06	3.1135e+06	0.953197
Q86W42	THO complex subunit 6 homolog	12.705	17	5	9	5	THOC6	1.66967e+06	2.34587e+06	0.711748
Q86VY4	Testis-specific Y-encoded-like protein 5	31.194	26	7	17	7	TSPYL5	764663	765334	0.999124
Q86VP6	Cullin-associated NEDD8-dissociated protein 1	179.241	44	44	319	44	CAND1	5.78842e+07	5.69365e+07	1.01664
Q86VM9	Zinc finger CCCH domain-containing protein 18	17.415	5	4	13	4	ZC3H18	582231	844560	0.68939
Q86V81	THO complex subunit 4	15.813	12	3	6	3	ALYREF	989454	1.02243e+06	0.967747
Q86U42	Polyadenylate-binding protein 2	10.513	9	2	17	2	PABPN1	375213	454588	0.825391
Q7Z6Z7	E3 ubiquitin-protein ligase HUWE1	11.959	1	5	5	5	HUWE1	745683	551729	1.35154
Q7Z4W1	L-xylulose reductase	32.537	34	8	46	8	DCXR	8.18883e+06	9.44675e+06	0.866841
Q7Z4V5	Hepatoma-derived growth factor-related protein 2	30.026	12	6	39	4	HDGFL2	3.42899e+06	2.68441e+06	1.27737
Q7Z460	CLIP-associating protein 1	3.504	2	2	2	2	CLASP1	574514	576912	0.995843
Q7Z406	Myosin-14	36.164	5	9	33	3	MYH14	718722	778456	0.923266
Q7Z3K3	Pogo transposable element with ZNF domain	4.464	2	2	8	2	POGZ	1.17296e+06	1.16287e+06	1.00868
Q7Z3C6	Autophagy-related protein 9A	8.476	4	3	4	3	ATG9A	796445	951483	0.837056
Q7RTV0	PHD finger-like domain-containing protein 5A	4.688	15	2	15	2	PHF5A	826919	1.06487e+06	0.776546
Q7L9L4	MOB kinase activator 1B	13.256	14	3	15	3	MOB1B	1.30831e+06	1.08729e+06	1.20328
Q7L7L0	Histone H2A type 3	84.177	46	13	427	3	H2AW	1.88537e+07	1.75951e+07	1.07153
Q7L5D6	Golgi to ER traffic protein 4 homolog	19.546	15	4	21	4	GET4	6.43133e+06	5.54191e+06	1.16049
Q7L4I2	Arginine/serine-rich coiled-coil protein 2	11.979	7	3	9	3	RSRC2	901626	1.00184e+06	0.899971
Q7L2J0	7SK snRNA methylphosphate capping enzyme	25.831	13	8	24	8	MEPCE	2.91899e+06	2.78487e+06	1.04816
Q7L2H7	Eukaryotic translation initiation factor 3 subunit M	20.575	20	6	11	6	EIF3M	2.35936e+06	1.75393e+06	1.34518
Q7L1Q6	Basic leucine zipper and W2 domain-containing protein 1	21.769	17	8	32	6	BZW1	3.61112e+06	4.46697e+06	0.808406
Q7L014	Probable ATP-dependent RNA helicase DDX46	105.058	27	28	191	28	DDX46	2.3436e+07	2.79206e+07	0.839382
Q7KZF4	Staphylococcal nuclease domain-containing protein 1	101.034	42	27	135	27	SND1	1.47428e+07	1.50518e+07	0.979469
Q71UI9	Histone H2A.V	24.875	31	5	298	3	H2AZ2	1.16139e+07	1.1978e+07	0.969608
Q6PKG0	La-related protein 1	36.277	13	13	38	13	LARP1	4.50983e+06	4.58336e+06	0.983958
Q6PI48	Aspartate--tRNA ligase, mitochondrial	5.243	3	2	7	2	DARS2	640688	673466	0.951329
Q6P996	Pyridoxal-dependent decarboxylase domain-containing protein 1	13.76	9	5	8	5	PDXDC1	1.73324e+06	1.82877e+06	0.947765
Q6P5R6	60S ribosomal protein L22-like 1	19.83	37	4	26	2	RPL22L1	2.28195e+06	2.50599e+06	0.910601
Q6P587	Acylpyruvase FAHD1, mitochondrial	7.866	13	3	7	3	FAHD1	5.42156e+06	5.94341e+06	0.912197
Q6P4I2	WD repeat-containing protein 73	4.599	6	2	2	2	WDR73	175193	248874	0.703943
Q6P2Q9	Pre-mRNA-processing-splicing factor 8	120.606	19	38	127	38	PRPF8	1.39478e+07	1.26783e+07	1.10013
Q6NXG1	Epithelial splicing regulatory protein 1	35.426	19	8	32	7	ESRP1	8.80155e+06	7.91482e+06	1.11203
Q6ICB0	Desumoylating isopeptidase 1	11.377	20	2	12	2	DESI1	7.94472e+06	7.01786e+06	1.13207
Q6GMV2	Histone-lysine N-trimethyltransferase SMYD5	15.959	13	4	10	4	SMYD5	2.47382e+06	2.10807e+06	1.1735
Q6DKI1	60S ribosomal protein L7-like 1	7.071	9	2	10	2	RPL7L1	630055	554008	1.13727
Q6DD88	Atlastin-3	5.844	5	3	5	3	ATL3	290419	258425	1.12381
Q6AI08	HEAT repeat-containing protein 6	68.363	22	18	61	18	HEATR6	5.40212e+06	5.03981e+06	1.07189
Q69YN2	CWF19-like protein 1	9.05	7	3	9	3	CWF19L1	396657	444904	0.891557
Q66K14	TBC1 domain family member 9B	18.093	5	6	18	6	TBC1D9B	9.64897e+06	7.0508e+06	1.36849
Q658Y4	Protein FAM91A1	7.508	3	2	5	2	FAM91A1	297672	342430	0.869294
Q5VZE5	N-alpha-acetyltransferase 35, NatC auxiliary subunit	14.311	4	4	8	4	NAA35	1.23666e+06	982718	1.25841
Q5VYK3	Proteasome adapter and scaffold protein ECM29	11.926	3	5	15	5	ECPAS	867017	908192	0.954662
Q5VTL8	Pre-mRNA-splicing factor 38B	31.861	18	9	51	9	PRPF38B	3.25305e+07	2.88614e+07	1.12713
Q5TFE4	5'-nucleotidase domain-containing protein 1	39.471	20	8	21	8	NT5DC1	3.09731e+06	4.01741e+06	0.770972
Q5T6V5	Queuosine salvage protein	9.168	13	4	10	4	C9orf64	667556	694669	0.96097
Q5T4S7	E3 ubiquitin-protein ligase UBR4	12.839	1	5	14	5	UBR4	973758	901295	1.0804
Q5T1V6	Probable ATP-dependent RNA helicase DDX59	27.327	16	8	15	8	DDX59	2.80072e+06	2.4162e+06	1.15914
Q5SSJ5	Heterochromatin protein 1-binding protein 3	33.182	19	11	42	11	HP1BP3	7.19964e+06	8.36856e+06	0.86032
Q5QNW6	Histone H2B type 2-F	209.069	84	21	527	2	H2BC18	6.05024e+08	6.62693e+08	0.912979
Q5JTY5	COBW domain-containing protein 3	9.432	9	2	8	2	CBWD3	395374	308514	1.28154
Q5JTH9	RRP12-like protein	30.227	9	9	19	9	RRP12	1.50691e+06	1.30411e+06	1.1555
Q5JRX3	Presequence protease, mitochondrial	11.489	5	4	15	4	PITRM1	1.58831e+06	2.20879e+06	0.719085
Q5H9R7	Serine/threonine-protein phosphatase 6 regulatory subunit 3	42.937	17	13	32	13	PPP6R3	2.03582e+08	1.68839e+08	1.20578
Q53EL6	Programmed cell death protein 4	33.436	23	8	37	8	PDCD4	7.51055e+06	8.45979e+06	0.887795
Q4KMP7	TBC1 domain family member 10B	16.882	9	4	6	4	TBC1D10B	387225	545229	0.710206
Q2T9J0	Peroxisomal leader peptide-processing protease	54.083	26	10	37	10	TYSND1	604969	579982	1.04308
Q2NL82	Pre-rRNA-processing protein TSR1 homolog	11.252	6	4	7	4	TSR1	1.4209e+06	1.32701e+06	1.07075
Q2M389	WASH complex subunit 4	5.706	2	2	2	2	WASHC4	397100	347021	1.14431
Q1KMD3	Heterogeneous nuclear ribonucleoprotein U-like protein 2	26.694	13	8	30	8	HNRNPUL2	5.68854e+06	3.92634e+06	1.44881
Q17RN3	Protein FAM98C	7.871	9	2	2	2	FAM98C	501934	506564	0.990861
Q16881	Thioredoxin reductase 1, cytoplasmic	216.3	57	28	261	27	TXNRD1	9.62694e+07	9.45878e+07	1.01778
Q16836	Hydroxyacyl-coenzyme A dehydrogenase, mitochondrial	9.685	14	4	7	4	HADH	4.34629e+06	4.20969e+06	1.03245
Q16777	Histone H2A type 2-C	109.268	47	14	498	4	H2AC20	2.42415e+09	2.42822e+09	0.998325
Q16698	2,4-dienoyl-CoA reductase [(3E)-enoyl-CoA-producing], mitochondrial	19.674	20	5	20	5	DECR1	3.38631e+06	4.2987e+06	0.787752
Q16629	Serine/arginine-rich splicing factor 7	36.484	28	8	75	7	SRSF7	1.68747e+07	1.9685e+07	0.85724
Q16576	Histone-binding protein RBBP7	36.692	31	8	26	4	RBBP7	8.51212e+07	7.99829e+07	1.06424
Q16555	Dihydropyrimidinase-related protein 2	4.619	3	2	5	2	DPYSL2	1.28305e+06	1.63067e+06	0.786826
Q16543	Hsp90 co-chaperone Cdc37	19.153	15	4	18	4	CDC37	8.06602e+06	7.13578e+06	1.13036
Q16531	DNA damage-binding protein 1	70.57	21	20	74	20	DDB1	6.92904e+06	8.09186e+06	0.856297
Q16401	26S proteasome non-ATPase regulatory subunit 5	26.044	16	7	24	7	PSMD5	1.41836e+07	1.28846e+07	1.10082
Q16204	Coiled-coil domain-containing protein 6	8.045	5	2	5	2	CCDC6	405590	362795	1.11796
Q16181	Septin-7	14.214	14	5	10	4	SEPTIN7	2.4446e+06	1.86972e+06	1.30747
Q15717	ELAV-like protein 1	27.574	31	8	33	8	ELAVL1	1.52893e+07	1.45938e+07	1.04766
Q15654	Thyroid receptor-interacting protein 6	53.529	40	11	45	11	TRIP6	3.62571e+06	3.37556e+06	1.07411
Q15645	Pachytene checkpoint protein 2 homolog	47.095	29	11	26	11	TRIP13	2.07582e+06	1.64928e+06	1.25862
Q15631	Translin	32.953	32	7	24	7	TSN	9.14365e+06	1.04781e+07	0.872642
Q15477	Helicase SKI2W	8.658	4	4	5	4	SKIV2L	700182	821274	0.852555
Q15459	Splicing factor 3A subunit 1	17.957	11	6	9	6	SF3A1	1.42624e+06	1.49348e+06	0.954979
Q15437	Protein transport protein Sec23B	40.001	17	10	35	7	SEC23B	2.87547e+06	2.7842e+06	1.03278
Q15436	Protein transport protein Sec23A	21.345	10	6	17	3	SEC23A	2.85282e+06	3.25924e+06	0.875302
Q15418	Ribosomal protein S6 kinase alpha-1	128.502	40	26	83	18	RPS6KA1	5.42522e+06	4.99625e+06	1.08586
Q15393	Splicing factor 3B subunit 3	79.86	19	17	88	17	SF3B3	1.30051e+07	1.04503e+07	1.24448
Q15386	Ubiquitin-protein ligase E3C	41.822	12	12	31	12	UBE3C	3.43862e+06	3.41048e+06	1.00825
Q15370	Elongin-B	10.831	36	4	12	4	ELOB	1.17839e+06	1.073e+06	1.09822
Q15366	Poly(rC)-binding protein 2	64.153	40	11	108	7	PCBP2	1.48665e+07	1.39715e+07	1.06406
Q15365	Poly(rC)-binding protein 1	91.81	48	13	151	9	PCBP1	8.49842e+07	8.52914e+07	0.996399
Q15287	RNA-binding protein with serine-rich domain 1	19.383	20	4	31	4	RNPS1	2.6003e+06	2.7187e+06	0.95645
Q15274	Nicotinate-nucleotide pyrophosphorylase [carboxylating]	4.784	7	2	3	2	QPRT	387422	275995	1.40373
Q15269	Periodic tryptophan protein 2 homolog	9.404	4	3	8	3	PWP2	970804	1.08765e+06	0.892573
Q15257	Serine/threonine-protein phosphatase 2A activator	19.207	22	6	16	6	PTPA	2.13293e+06	2.85128e+06	0.74806
Q15233	Non-POU domain-containing octamer-binding protein	33.658	18	9	31	8	NONO	9.61045e+06	9.39063e+06	1.02341
Q15185	Prostaglandin E synthase 3	20.504	37	5	45	5	PTGES3	1.24352e+07	1.22551e+07	1.0147
Q15181	Inorganic pyrophosphatase	47.633	53	12	65	11	PPA1	9.94576e+06	9.41985e+06	1.05583
Q15126	Phosphomevalonate kinase	20.209	39	7	15	7	PMVK	3.23332e+06	3.34139e+06	0.967655
Q15102	Platelet-activating factor acetylhydrolase IB subunit alpha1	25.339	40	7	41	7	PAFAH1B3	5.6317e+06	5.26494e+06	1.06966
Q15084	Protein disulfide-isomerase A6	116.459	49	18	129	18	PDIA6	1.35546e+08	1.37391e+08	0.986571
Q15056	Eukaryotic translation initiation factor 4H	12.681	19	4	20	4	EIF4H	2.08466e+06	1.99602e+06	1.04441
Q15046	Lysine--tRNA ligase	72.973	27	17	92	17	KARS1	1.93907e+07	1.8751e+07	1.03412
Q15029	116 kDa U5 small nuclear ribonucleoprotein component	61.345	23	17	66	16	EFTUD2	3.46184e+06	2.90442e+06	1.19192
Q15021	Condensin complex subunit 1	89.784	22	27	68	27	NCAPD2	8.15498e+06	7.19619e+06	1.13323
Q15020	Squamous cell carcinoma antigen recognized by T-cells 3	38.27	15	12	21	12	SART3	8.9777e+06	7.26703e+06	1.2354
Q15008	26S proteasome non-ATPase regulatory subunit 6	84.316	46	19	132	19	PSMD6	1.95926e+07	1.8721e+07	1.04656
Q15003	Condensin complex subunit 2	27.327	16	8	13	8	NCAPH	3.92761e+06	3.27796e+06	1.19819
Q14CX7	N-alpha-acetyltransferase 25, NatB auxiliary subunit	10.014	4	4	6	4	NAA25	1.01923e+06	1.1129e+06	0.915828
Q14980	Nuclear mitotic apparatus protein 1	115.923	22	33	89	33	NUMA1	1.64072e+07	1.71326e+07	0.957662
Q14974	Importin subunit beta-1	142.687	40	27	211	27	KPNB1	3.17523e+07	2.73265e+07	1.16196
Q14919	Dr1-associated corepressor	6.606	11	2	7	2	DRAP1	888993	678634	1.30997
Q14839	Chromodomain-helicase-DNA-binding protein 4	51.728	8	13	53	9	CHD4	4.14602e+06	5.30205e+06	0.781965
Q14790	Caspase-8	10.553	8	4	5	4	CASP8	564542	467288	1.20812
Q14738	Serine/threonine-protein phosphatase 2A 56 kDa regulatory subunit delta isoform	9.161	5	3	9	3	PPP2R5D	364474	534118	0.682385
Q14697	Neutral alpha-glucosidase AB	111.054	31	26	190	26	GANAB	4.50934e+07	4.09029e+07	1.10245
Q14694	Ubiquitin carboxyl-terminal hydrolase 10	65.305	25	15	42	15	USP10	3.57991e+06	4.80213e+06	0.745484
Q14684	Ribosomal RNA processing protein 1 homolog B	7.391	3	2	4	2	RRP1B	2.87356e+06	1.98128e+06	1.45036
Q14683	Structural maintenance of chromosomes protein 1A	39.331	12	14	38	14	SMC1A	2.90959e+06	3.54968e+06	0.819678
Q14677	Clathrin interactor 1	10.542	6	3	10	3	CLINT1	1.77178e+06	1.80528e+06	0.981439
Q14566	DNA replication licensing factor MCM6	74.48	26	18	99	18	MCM6	8.68799e+06	9.08204e+06	0.956613
Q14498	RNA-binding protein 39	54.973	27	12	78	12	RBM39	1.59291e+07	1.39288e+07	1.1436
Q14444	Caprin-1	11.422	6	3	8	3	CAPRIN1	1.61908e+06	1.86036e+06	0.870308
Q14258	E3 ubiquitin/ISG15 ligase TRIM25	78.775	29	17	76	17	TRIM25	5.22152e+06	4.44234e+06	1.1754
Q14247	Src substrate cortactin	77.861	43	22	103	22	CTTN	2.30758e+07	2.52404e+07	0.914241
Q14204	Cytoplasmic dynein 1 heavy chain 1	138.669	11	42	127	42	DYNC1H1	3.94475e+07	3.95898e+07	0.996407
Q14157	Ubiquitin-associated protein 2-like	8.817	4	3	9	3	UBAP2L	647531	681606	0.950008
Q14152	Eukaryotic translation initiation factor 3 subunit A	104.659	24	30	126	30	EIF3A	2.29931e+07	2.39008e+07	0.962024
Q14145	Kelch-like ECH-associated protein 1	33.457	21	11	33	11	KEAP1	2.35842e+06	2.0352e+06	1.15882
Q14137	Ribosome biogenesis protein BOP1	8.483	8	3	7	3	BOP1	482609	330611	1.45975
Q14103	Heterogeneous nuclear ribonucleoprotein D0	23.325	20	6	43	4	HNRNPD	8.60696e+07	9.01995e+07	0.954213
Q14008	Cytoskeleton-associated protein 5	13.824	3	5	7	5	CKAP5	3.55483e+06	3.3547e+06	1.05965
Q13907	Isopentenyl-diphosphate Delta-isomerase 1	11.942	19	4	11	4	IDI1	246783	218551	1.12918
Q13895	Bystin	14.737	7	3	11	3	BYSL	2.74712e+06	2.28742e+06	1.20097
Q13838	Spliceosome RNA helicase DDX39B	64.42	35	16	100	4	DDX39B	1.42215e+06	1.73074e+06	0.821699
Q13823	Nucleolar GTP-binding protein 2	7.455	3	3	10	3	GNL2	724521	773081	0.937187
Q13765	Nascent polypeptide-associated complex subunit alpha	46.686	27	7	49	7	NACA	3.24795e+07	3.33773e+07	0.973104
Q13630	GDP-L-fucose synthase	23.358	26	6	22	6	GFUS	1.53177e+07	1.60217e+07	0.956055
Q13616	Cullin-1	25.827	12	8	27	8	CUL1	6.53128e+06	6.79817e+06	0.960742
Q13601	KRR1 small subunit processome component homolog	3.909	6	2	2	2	KRR1	370669	314844	1.17731
Q13596	Sorting nexin-1	18.578	13	6	12	4	SNX1	2.21568e+06	2.07146e+06	1.06962
Q13595	Transformer-2 protein homolog alpha	12.708	12	4	23	3	TRA2A	2.3217e+06	2.53224e+06	0.916854
Q13573	SNW domain-containing protein 1	12.216	8	4	7	4	SNW1	1.09454e+06	872088	1.25508
Q13561	Dynactin subunit 2	44.098	30	10	34	10	DCTN2	2.00005e+06	1.94352e+06	1.02909
Q13547	Histone deacetylase 1	33.533	18	8	48	5	HDAC1	8.59288e+06	8.85332e+06	0.970583
Q13546	Receptor-interacting serine/threonine-protein kinase 1	8.686	6	3	5	3	RIPK1	738428	659883	1.11903
Q13523	Serine/threonine-protein kinase PRP4 homolog	31.072	9	9	43	9	PRPF4B	5.86977e+06	6.81313e+06	0.861538
Q13442	28 kDa heat- and acid-stable phosphoprotein	24.998	27	6	31	6	PDAP1	9.83666e+06	1.18412e+07	0.830713
Q13435	Splicing factor 3B subunit 2	36.99	15	14	56	14	SF3B2	1.33158e+07	1.29573e+07	1.02767
Q13428	Treacle protein	54.377	11	14	84	14	TCOF1	8.50562e+06	8.70411e+06	0.977196
Q13404	Ubiquitin-conjugating enzyme E2 variant 1	14.018	33	5	31	5	UBE2V1	5.20724e+06	5.21784e+06	0.997969
Q13363	C-terminal-binding protein 1	7.974	6	3	4	3	CTBP1	325413	395403	0.822992
Q13347	Eukaryotic translation initiation factor 3 subunit I	7.323	12	3	6	3	EIF3I	1.39558e+06	962810	1.44949
Q13330	Metastasis-associated protein MTA1	11.083	6	4	15	3	MTA1	5.50071e+06	6.50941e+06	0.845041
Q13283	Ras GTPase-activating protein-binding protein 1	53.454	32	12	78	11	G3BP1	1.78805e+07	1.8728e+07	0.954748
Q13263	Transcription intermediary factor 1-beta	97.762	28	20	131	20	TRIM28	3.41737e+07	3.32103e+07	1.02901
Q13247	Serine/arginine-rich splicing factor 6	46.755	24	10	106	6	SRSF6	1.84678e+07	1.88033e+07	0.982158
Q13243	Serine/arginine-rich splicing factor 5	20.478	21	5	36	4	SRSF5	975283	1.08049e+06	0.902628
Q13242	Serine/arginine-rich splicing factor 9	11.318	19	5	17	5	SRSF9	2.41732e+06	2.57658e+06	0.93819
Q13228	Methanethiol oxidase	53.273	39	14	53	14	SELENBP1	1.81673e+07	1.80203e+07	1.00816
Q13200	26S proteasome non-ATPase regulatory subunit 2	109.96	34	23	128	23	PSMD2	3.63335e+07	3.50616e+07	1.03628
Q13185	Chromobox protein homolog 3	32.562	37	6	25	5	CBX3	1.08927e+07	1.02952e+07	1.05805
Q13177	Serine/threonine-protein kinase PAK 2	33.288	25	10	26	10	PAK2	5.47458e+06	4.15888e+06	1.31636
Q13162	Peroxiredoxin-4	32.661	25	7	41	4	PRDX4	2.52443e+06	2.2625e+06	1.11577
Q13151	Heterogeneous nuclear ribonucleoprotein A0	33.757	25	7	60	5	HNRNPA0	1.92535e+07	2.18575e+07	0.880863
Q13148	TAR DNA-binding protein 43	23.51	18	5	15	5	TARDBP	3.7286e+06	4.29605e+06	0.867912
Q13131	5'-AMP-activated protein kinase catalytic subunit alpha-1	16.113	8	3	9	3	PRKAA1	5.0455e+06	4.28358e+06	1.17787
Q13098	COP9 signalosome complex subunit 1	8.708	9	4	8	4	GPS1	385324	299398	1.287
Q13085	Acetyl-CoA carboxylase 1	275.965	36	64	248	64	ACACA	3.84049e+06	3.08505e+06	1.24487
Q13045	Protein flightless-1 homolog	70.508	18	20	55	20	FLII	1.7504e+06	1.57754e+06	1.10957
Q12931	Heat shock protein 75 kDa, mitochondrial	60.758	28	17	96	16	TRAP1	1.63882e+07	1.50727e+07	1.08728
Q12907	Vesicular integral-membrane protein VIP36	17.814	21	6	20	6	LMAN2	5.64885e+06	4.56795e+06	1.23663
Q12906	Interleukin enhancer-binding factor 3	74.403	22	18	137	15	ILF3	2.5519e+07	2.18947e+07	1.16554
Q12905	Interleukin enhancer-binding factor 2	39.959	33	10	70	10	ILF2	9.01067e+06	8.1023e+06	1.11211
Q12904	Aminoacyl tRNA synthase complex-interacting multifunctional protein 1	4.355	10	2	4	2	AIMP1	597188	740961	0.805965
Q12874	Splicing factor 3A subunit 3	8.266	6	3	5	3	SF3A3	1.33838e+06	1.37815e+06	0.971142
Q12849	G-rich sequence factor 1	14.157	9	3	9	3	GRSF1	2.41132e+06	2.2365e+06	1.07816
Q12792	Twinfilin-1	31.801	26	8	43	8	TWF1	9.45632e+06	9.60389e+06	0.984634
Q12789	General transcription factor 3C polypeptide 1	8.177	2	3	4	3	GTF3C1	4.55009e+06	4.16552e+06	1.09232
Q12768	WASH complex subunit 5	9.038	3	3	12	3	WASHC5	1.90435e+06	1.99779e+06	0.953227
Q10567	AP-1 complex subunit beta-1	62.031	24	17	55	17		6.44087e+06	4.91117e+06	1.31147
Q0VGL1	Ragulator complex protein LAMTOR4	5.543	29	2	3	2	LAMTOR4	9.35741e+07	1.29292e+08	0.723742
Q0VDF9	Heat shock 70 kDa protein 14	8.766	10	3	3	3	HSPA14	534515	540533	0.988866
Q09666	Neuroblast differentiation-associated protein AHNAK	54.931	14	19	39	19	AHNAK	2.40984e+07	2.46789e+07	0.976477
Q09161	Nuclear cap-binding protein subunit 1	64.398	22	15	61	15	NCBP1	3.15867e+07	2.21044e+07	1.42898
Q08J23	RNA cytosine C(5)-methyltransferase NSUN2	49.971	26	14	33	14	NSUN2	5.93338e+06	6.13557e+06	0.967047
Q08AF3	Schlafen family member 5	5.703	2	2	2	2	SLFN5	449508	368460	1.21996
Q08945	FACT complex subunit SSRP1	59.9	25	17	68	17	SSRP1	8.76411e+06	9.95347e+06	0.880508
Q08211	ATP-dependent RNA helicase A	150.883	32	34	194	34	DHX9	3.09808e+07	3.35508e+07	0.923398
Q07960	Rho GTPase-activating protein 1	45.745	36	11	68	11	ARHGAP1	8.52036e+06	9.13491e+06	0.932725
Q07955	Serine/arginine-rich splicing factor 1	55.541	45	14	219	14	SRSF1	2.35502e+07	2.65494e+07	0.887032
Q07812	Apoptosis regulator BAX	17.987	30	5	17	5	BAX	2.04151e+06	1.65954e+06	1.23016
Q07666	KH domain-containing, RNA-binding, signal transduction-associated protein 1	26.482	19	8	33	8	KHDRBS1	4.97756e+06	4.84877e+06	1.02656
Q07065	Cytoskeleton-associated protein 4	30.668	17	7	12	7	CKAP4	5.45609e+06	5.83698e+06	0.934744
Q07021	Complement component 1 Q subcomponent-binding protein, mitochondrial	16.002	12	2	7	2	C1QBP	6.37507e+06	6.1612e+06	1.03471
Q07020	60S ribosomal protein L18	158.776	62	21	516	21	RPL18	7.35307e+08	6.98318e+08	1.05297
Q06830	Peroxiredoxin-1	99.899	76	18	188	14	PRDX1	2.32276e+08	1.5648e+08	1.48438
Q06787	Synaptic functional regulator FMR1	18.177	10	6	14	4	FMR1	5.74719e+06	5.34481e+06	1.07528
Q06323	Proteasome activator complex subunit 1	67.682	54	16	93	16	PSME1	9.57441e+07	9.59406e+07	0.997951
Q06210	Glutamine--fructose-6-phosphate aminotransferase [isomerizing] 1	65.138	32	18	44	18	GFPT1	4.16764e+06	4.9449e+06	0.842817
Q06203	Amidophosphoribosyltransferase	28.936	17	7	32	7	PPAT	4.23842e+06	3.75941e+06	1.12742
Q06124	Tyrosine-protein phosphatase non-receptor type 11	39.526	16	7	28	7	PTPN11	2.36759e+06	1.70105e+06	1.39185
Q05639	Elongation factor 1-alpha 2	195.71	59	24	854	9	EEF1A2	1.50187e+07	1.65134e+07	0.909487
Q05519	Serine/arginine-rich splicing factor 11	53.181	19	7	101	7	SRSF11	1.57265e+07	1.34092e+07	1.17281
Q04917	14-3-3 protein eta	51.553	39	12	91	7	YWHAH	3.91682e+06	3.18239e+06	1.23078
Q04837	Single-stranded DNA-binding protein, mitochondrial	20.479	47	6	18	6	SSBP1	1.38724e+07	1.4259e+07	0.972887
Q04760	Lactoylglutathione lyase	42.279	47	8	36	8	GLO1	3.41611e+07	3.24379e+07	1.05312
Q04637	Eukaryotic translation initiation factor 4 gamma 1	139.229	25	34	159	34	EIF4G1	4.05048e+07	3.99938e+07	1.01278
Q04446	1,4-alpha-glucan-branching enzyme	12.384	5	3	13	3	GBE1	744378	721140	1.03222
Q04206	Transcription factor p65	9.757	10	5	9	5	RELA	288138	297076	0.969914
Q03518	Antigen peptide transporter 1	26.837	16	6	14	6	TAP1	1.00551e+06	1.13793e+06	0.883631
Q02978	Mitochondrial 2-oxoglutarate/malate carrier protein	15.8	18	4	14	4	SLC25A11	3.20072e+06	2.76755e+06	1.15652
Q02878	60S ribosomal protein L6	293.811	65	42	775	42	RPL6	6.15986e+08	6.223e+08	0.989855
Q02790	Peptidyl-prolyl cis-trans isomerase FKBP4	94.164	52	21	131	21	FKBP4	3.29214e+07	3.21371e+07	1.02441
Q02750	Dual specificity mitogen-activated protein kinase kinase 1	28.396	18	8	41	4	MAP2K1	4.75131e+06	4.72609e+06	1.00534
Q02543	60S ribosomal protein L18a	87.195	68	18	254	18	RPL18A	1.22868e+08	1.22526e+08	1.00279
Q01844	RNA-binding protein EWS	6.032	4	2	6	2	EWSR1	1.2398e+06	1.09439e+06	1.13286
Q01813	ATP-dependent 6-phosphofructokinase, platelet type	72.645	30	19	98	16	PFKP	9.86386e+06	8.70116e+06	1.13363
Q01650	Large neutral amino acids transporter small subunit 1	20.238	12	5	28	5	SLC7A5	3.40089e+06	3.5477e+06	0.958617
Q01518	Adenylyl cyclase-associated protein 1	35.36	23	9	28	8	CAP1	2.54389e+06	2.70346e+06	0.940977
Q01469	Fatty acid-binding protein 5	5.18	14	2	4	2	FABP5	813530	708893	1.14761
Q01130	Serine/arginine-rich splicing factor 2	27.511	22	5	62	5	SRSF2	1.77426e+07	1.67957e+07	1.05638
Q01105	Protein SET	54.713	46	9	75	9	SET	2.81713e+07	3.57689e+07	0.787592
Q01085	Nucleolysin TIAR	3.674	5	2	4	2	TIAL1	3.30028e+06	2.78082e+06	1.1868
Q01081	Splicing factor U2AF 35 kDa subunit	37.995	32	7	41	7	U2AF1	6.86547e+06	6.20173e+06	1.10703
Q00839	Heterogeneous nuclear ribonucleoprotein U	108.815	34	24	195	24	HNRNPU	5.17352e+07	5.57217e+07	0.928456
Q00796	Sorbitol dehydrogenase	89.643	55	15	108	15	SORD	6.6255e+07	6.77399e+07	0.97808
Q00765	Receptor expression-enhancing protein 5	31.416	21	7	53	7	REEP5	1.21932e+07	1.24898e+07	0.976257
Q00688	Peptidyl-prolyl cis-trans isomerase FKBP3	19.33	37	7	19	7	FKBP3	8.45302e+06	1.12812e+07	0.749303
Q00610	Clathrin heavy chain 1	288.962	41	59	355	59	CLTC	4.6651e+07	4.91497e+07	0.949162
Q00577	Transcriptional activator protein Pur-alpha	3.692	5	2	5	2	PURA	576213	437382	1.31741
Q00535	Cyclin-dependent-like kinase 5	7.047	8	3	11	2	CDK5	1.06739e+06	1.06627e+06	1.00105
Q00341	Vigilin	36.848	12	13	30	13	HDLBP	2.47183e+06	2.01372e+06	1.22749
Q00325	Phosphate carrier protein, mitochondrial	25.499	24	8	47	8	SLC25A3	1.84304e+07	1.84617e+07	0.998307
P99999	Cytochrome c	13.255	28	5	11	5	CYCS	4.64996e+06	4.40405e+06	1.05584
P98179	RNA-binding protein 3	9.39	27	3	6	3	RBM3	342139	388144	0.881476
P85037	Forkhead box protein K1	6.749	3	2	10	2	FOXK1	1.86044e+06	1.71414e+06	1.08535
P84103	Serine/arginine-rich splicing factor 3	43.727	41	7	85	6	SRSF3	2.27762e+07	2.71913e+07	0.837628
P84098	60S ribosomal protein L19	122.136	54	21	266	21	RPL19	1.43061e+08	1.3835e+08	1.03405
P84090	Enhancer of rudimentary homolog	14.86	27	3	34	3	ERH	5.5893e+06	5.21012e+06	1.07278
P84085	ADP-ribosylation factor 5	76.77	75	11	135	5	ARF5	5.10134e+06	4.28169e+06	1.19143
P83731	60S ribosomal protein L24	44.998	46	9	95	9	RPL24	2.84668e+07	2.91302e+07	0.977227
P82979	SAP domain-containing ribonucleoprotein	13.38	23	5	12	5	SARNP	4.48446e+06	3.80363e+06	1.179
P82930	28S ribosomal protein S34, mitochondrial	8.29	7	3	6	3	MRPS34	1.47132e+06	1.18839e+06	1.23808
P82675	28S ribosomal protein S5, mitochondrial	5.697	6	2	5	2	MRPS5	2.70878e+06	2.26938e+06	1.19362
P78527	DNA-dependent protein kinase catalytic subunit	168.789	16	56	162	56	PRKDC	1.75636e+07	1.62711e+07	1.07943
P78417	Glutathione S-transferase omega-1	76.992	51	16	171	16	GSTO1	4.45351e+08	4.9014e+08	0.908619
P78371	T-complex protein 1 subunit beta	121.232	55	22	165	22	CCT2	2.19263e+07	2.28039e+07	0.961512
P78347	General transcription factor II-I	49.263	22	16	52	16	GTF2I	5.63964e+07	5.48363e+07	1.02845
P78346	Ribonuclease P protein subunit p30	14.445	19	4	10	4	RPP30	261335	284511	0.91854
P69905	Hemoglobin subunit alpha	4.757	15	2	6	2	HBA1; HBA2	432040	564568	0.765258
P68402	Platelet-activating factor acetylhydrolase IB subunit alpha2	9.923	17	3	16	3	PAFAH1B2	2.837e+06	3.21374e+06	0.882772
P68400	Casein kinase II subunit alpha	33.002	28	8	32	8	CSNK2A1	1.68861e+06	2.09573e+06	0.805741
P68371	Tubulin beta-4B chain	298.535	69	34	844	2	TUBB4B	5.65164e+08	5.9912e+08	0.943323
P68133	Actin, alpha skeletal muscle	183.95	45	22	586	4	ACTA1	8.61615e+06	7.04035e+06	1.22383
P68104	Elongation factor 1-alpha 1	291.404	72	31	1005	16	EEF1A1	3.98213e+08	3.70463e+08	1.07491
P68036	Ubiquitin-conjugating enzyme E2 L3	47.874	53	7	62	7	UBE2L3	7.24441e+07	6.86283e+07	1.0556
P67936	Tropomyosin alpha-4 chain	43.118	40	12	46	9	TPM4	1.82797e+07	1.71037e+07	1.06876
P67870	Casein kinase II subunit beta	12.783	17	3	19	3	CSNK2B	2.5235e+06	1.96532e+06	1.28402
P67812	Signal peptidase complex catalytic subunit SEC11A	8.332	16	3	22	3	SEC11A	2.68968e+06	2.60805e+06	1.0313
P67809	Y-box-binding protein 1	87.948	54	14	102	14	YBX1	2.16879e+07	2.26695e+07	0.956702
P67775	Serine/threonine-protein phosphatase 2A catalytic subunit alpha isoform	24.246	30	7	26	7	PPP2CA	4.82263e+06	3.73299e+06	1.2919
P63279	SUMO-conjugating enzyme UBC9	12.053	20	4	22	4	UBE2I	2.66667e+06	3.29326e+06	0.809737
P63244	Receptor of activated protein C kinase 1	110.673	70	18	172	18	RACK1	2.44521e+07	2.95618e+07	0.827151
P63241	Eukaryotic translation initiation factor 5A-1	63.036	45	10	144	10	EIF5A	7.74145e+07	6.9683e+07	1.11095
P63220	40S ribosomal protein S21	15.202	41	3	16	3	RPS21	7.08595e+06	6.32369e+06	1.12054
P63208	S-phase kinase-associated protein 1	10.84	21	3	12	3	SKP1	2.76364e+06	1.96477e+06	1.4066
P63173	60S ribosomal protein L38	32.924	54	6	59	6	RPL38	6.55089e+06	5.37442e+06	1.2189
P63151	Serine/threonine-protein phosphatase 2A 55 kDa regulatory subunit B alpha isoform	31.616	26	9	25	9	PPP2R2A	4.79681e+07	3.98573e+07	1.2035
P63104	14-3-3 protein zeta/delta	108.864	67	20	181	15	YWHAZ	1.03817e+08	9.35083e+07	1.11025
P63000	Ras-related C3 botulinum toxin substrate 1	19.608	34	6	27	5	RAC1	3.02052e+06	2.99178e+06	1.00961
P62995	Transformer-2 protein homolog beta	44.929	25	10	77	9	TRA2B	1.22809e+07	1.14795e+07	1.06981
P62993	Growth factor receptor-bound protein 2	18.072	24	5	14	5	GRB2	2.21826e+06	2.38913e+06	0.928481
P62979	Ubiquitin-40S ribosomal protein S27a	94.373	67	15	226	15	RPS27A	1.25629e+08	1.24087e+08	1.01242
P62937	Peptidyl-prolyl cis-trans isomerase A	123.676	85	14	262	14	PPIA	1.13865e+08	1.09558e+08	1.03931
P62917	60S ribosomal protein L8	96.415	66	23	153	23	RPL8	6.63218e+07	6.4124e+07	1.03427
P62913	60S ribosomal protein L11	22.241	37	6	39	6	RPL11	8.61472e+06	8.53313e+06	1.00956
P62906	60S ribosomal protein L10a	91.496	48	14	168	14	RPL10A	3.04952e+07	2.93244e+07	1.03993
P62899	60S ribosomal protein L31	51.891	54	11	103	11	RPL31	4.12323e+07	3.76722e+07	1.0945
P62891	60S ribosomal protein L39	19.224	25	3	88	3	RPL39	8.47529e+07	8.80021e+07	0.963078
P62888	60S ribosomal protein L30	54.314	68	8	64	8	RPL30	1.22516e+07	1.45542e+07	0.841792
P62879	Guanine nucleotide-binding protein G(I)/G(S)/G(T) subunit beta-2	39.558	38	10	38	10	GNB2	8.76148e+06	9.69474e+06	0.903735
P62861	40S ribosomal protein S30	18.569	20	4	83	4	Fau; FAU	6.21634e+06	6.84687e+06	0.907909
P62854	40S ribosomal protein S26	34.919	44	4	115	4	RPS26	3.77962e+07	2.99914e+07	1.26024
P62851	40S ribosomal protein S25	35.339	38	9	156	9	RPS25	2.35367e+07	2.14687e+07	1.09633
P62847	40S ribosomal protein S24	34.501	38	6	69	6	RPS24	2.64053e+07	2.89602e+07	0.91178
P62841	40S ribosomal protein S15	47.264	41	4	50	4	RPS15	3.97491e+06	3.46369e+06	1.14759
P62829	60S ribosomal protein L23	43.711	54	8	80	8	RPL23	9.66924e+06	1.34673e+07	0.71798
P62826	GTP-binding nuclear protein Ran	117.66	54	18	233	18	RAN	6.33382e+07	6.87133e+07	0.921775
P62805	Histone H4	193.338	73	23	660	23	H4-16; H4C1; H4C11; H4C12; H4C13; H4C14; H4C15; H4C2; H4C3; H4C4; H4C5; H4C6; H4C8; H4C9	1.28989e+09	1.3415e+09	0.961529
P62753	40S ribosomal protein S6	47.678	28	8	103	8	RPS6	2.34362e+07	2.04253e+07	1.14741
P62750	60S ribosomal protein L23a	73.711	50	15	161	15	RPL23A	4.03796e+07	4.42942e+07	0.911621
P62701	40S ribosomal protein S4, X isoform	120.438	68	24	292	24	RPS4X	9.97254e+07	1.02684e+08	0.971189
P62495	Eukaryotic peptide chain release factor subunit 1	42.32	32	10	54	10	ETF1	3.58661e+06	3.31282e+06	1.08265
P62491	Ras-related protein Rab-11A	29.628	42	8	53	8	RAB11A	5.69245e+06	5.57679e+06	1.02074
P62424	60S ribosomal protein L7a	137.789	65	26	406	26	RPL7A	1.59436e+08	1.54106e+08	1.03458
P62341	Thioredoxin reductase-like selenoprotein T	5.993	10	2	7	2	SELENOT	1.84874e+06	1.85221e+06	0.998128
P62333	26S proteasome regulatory subunit 10B	13.69	13	4	15	4	PSMC6	2.81139e+06	2.51187e+06	1.11924
P62330	ADP-ribosylation factor 6	13.119	34	4	10	4	ARF6	519475	675643	0.76886
P62316	Small nuclear ribonucleoprotein Sm D2	41.304	65	9	75	9	SNRPD2	1.18709e+07	1.21651e+07	0.975813
P62314	Small nuclear ribonucleoprotein Sm D1	34.121	55	5	61	5	SNRPD1	8.33897e+06	6.64742e+06	1.25447
P62312	U6 snRNA-associated Sm-like protein LSm6	5.395	23	2	12	2	LSM6	1.66001e+06	1.67503e+06	0.99103
P62306	Small nuclear ribonucleoprotein F	15.893	50	3	22	3	SNRPF	1.34545e+07	1.1626e+07	1.15727
P62304	Small nuclear ribonucleoprotein E	12.314	30	3	22	3	SNRPE	3.88989e+06	3.43156e+06	1.13356
P62280	40S ribosomal protein S11	91.648	79	19	206	19	RPS11	5.10997e+07	5.32334e+07	0.959918
P62277	40S ribosomal protein S13	103.899	59	17	270	17	RPS13	1.47656e+08	1.40907e+08	1.0479
P62273	40S ribosomal protein S29	25.926	57	5	65	5	RPS29	3.32869e+07	2.26568e+07	1.46918
P62269	40S ribosomal protein S18	115.665	75	25	304	25	RPS18	1.10194e+08	1.05006e+08	1.04941
P62266	40S ribosomal protein S23	59.953	62	11	154	11	RPS23	5.893e+07	5.67591e+07	1.03825
P62263	40S ribosomal protein S14	38.913	40	7	78	7	RPS14	1.55116e+07	1.50961e+07	1.02752
P62258	14-3-3 protein epsilon	68.031	47	12	151	10	YWHAE	2.31096e+07	2.55689e+07	0.903815
P62249	40S ribosomal protein S16	71.983	63	13	191	13	RPS16	2.67336e+07	2.35556e+07	1.13491
P62244	40S ribosomal protein S15a	67.983	82	16	155	16	RPS15A	4.34129e+07	4.10548e+07	1.05744
P62241	40S ribosomal protein S8	120.338	60	18	229	18	RPS8	9.22754e+07	9.29247e+07	0.993012
P62195	26S proteasome regulatory subunit 8	25.472	23	7	24	6	PSMC5	1.37415e+06	1.45889e+06	0.941919
P62191	26S proteasome regulatory subunit 4	37.212	27	10	44	9	PSMC1	4.48489e+06	4.89815e+06	0.915631
P62136	Serine/threonine-protein phosphatase PP1-alpha catalytic subunit	62.962	46	14	87	5	PPP1CA	1.19042e+07	1.09464e+07	1.0875
P62081	40S ribosomal protein S7	97.322	65	16	218	16	RPS7	6.84869e+07	6.7992e+07	1.00728
P61981	14-3-3 protein gamma	63.35	43	13	116	6	YWHAG	1.15619e+07	1.14371e+07	1.01091
P61978	Heterogeneous nuclear ribonucleoprotein K	118.606	53	21	231	21	HNRNPK	6.76164e+07	6.52823e+07	1.03575
P61970	Nuclear transport factor 2	12.544	39	3	10	3	NUTF2	3.23414e+06	3.05301e+06	1.05933
P61966	AP-1 complex subunit sigma-1A	12.762	21	3	9	3	AP1S1	359765	398869	0.901962
P61803	Dolichyl-diphosphooligosaccharide--protein glycosyltransferase subunit DAD1	14.169	29	3	40	3	DAD1	7.00408e+06	7.20628e+06	0.971941
P61758	Prefoldin subunit 3	5.701	10	2	3	2	VBP1	624738	639972	0.976196
P61619	Protein transport protein Sec61 subunit alpha isoform 1	6.147	4	2	9	2	SEC61A1	1.42909e+06	1.30658e+06	1.09376
P61604	10 kDa heat shock protein, mitochondrial	27.989	60	7	30	7	HSPE1	3.92439e+07	4.15221e+07	0.945133
P61513	60S ribosomal protein L37a	22.83	59	5	27	5	RPL37A	7.62688e+06	6.86006e+06	1.11178
P61457	Pterin-4-alpha-carbinolamine dehydratase	7.226	30	3	9	3	PCBD1	401059	427851	0.93738
P61353	60S ribosomal protein L27	73.86	67	13	175	13	RPL27	4.74982e+07	4.75633e+07	0.998632
P61313	60S ribosomal protein L15	182.131	71	26	452	26	RPL15	4.29697e+08	5.20918e+08	0.824884
P61289	Proteasome activator complex subunit 3	48.57	37	9	32	9	PSME3	3.75828e+06	3.33278e+06	1.12767
P61247	40S ribosomal protein S3a	95.344	70	21	186	21	RPS3A	2.58797e+07	2.70817e+07	0.955619
P61224	Ras-related protein Rap-1b	13.886	19	4	34	4	RAP1B	1.96333e+06	2.5768e+06	0.761926
P61204	ADP-ribosylation factor 3	80.279	62	12	152	6	ARF3	3.33907e+07	3.27664e+07	1.01905
P61163	Alpha-centractin	21.856	24	6	15	6	ACTR1A	2.10021e+06	2.08441e+06	1.00758
P61160	Actin-related protein 2	23.298	21	6	22	6	ACTR2	2.20771e+06	1.86333e+06	1.18482
P61158	Actin-related protein 3	41.994	42	13	37	13	ACTR3	9.94052e+06	1.02932e+07	0.965735
P61106	Ras-related protein Rab-14	19.853	31	5	24	4	RAB14	5.11726e+06	4.4614e+06	1.14701
P61088	Ubiquitin-conjugating enzyme E2 N	19.007	39	6	48	6	UBE2N	1.10281e+07	1.22402e+07	0.900975
P61086	Ubiquitin-conjugating enzyme E2 K	17.53	38	6	32	6	UBE2K	5.85134e+06	5.81226e+06	1.00672
P61077	Ubiquitin-conjugating enzyme E2 D3	17.199	36	3	16	3	UBE2D3	3.13075e+06	3.03372e+06	1.03198
P61026	Ras-related protein Rab-10	25.682	31	6	25	3	RAB10	6.19263e+06	7.37244e+06	0.83997
P61011	Signal recognition particle 54 kDa protein	20.472	17	8	16	8	SRP54	1.24375e+06	1.39424e+06	0.892061
P61009	Signal peptidase complex subunit 3	6.135	12	2	4	2	SPCS3	406569	311712	1.30431
P60981	Destrin	60.753	64	13	75	10	DSTN	1.82202e+07	1.66183e+07	1.09639
P60953	Cell division control protein 42 homolog	29.644	38	6	35	5	CDC42	2.97289e+06	2.12234e+06	1.40076
P60900	Proteasome subunit alpha type-6	24.947	29	6	42	6	PSMA6	6.10849e+06	5.15361e+06	1.18528
P60891	Ribose-phosphate pyrophosphokinase 1	35.622	28	7	49	3	PRPS1	1.2039e+07	1.00545e+07	1.19737
P60866	40S ribosomal protein S20	34.769	47	7	64	7	RPS20	1.60555e+07	1.48302e+07	1.08262
P60842	Eukaryotic initiation factor 4A-I	131.294	53	24	221	12	EIF4A1	4.16074e+07	3.94798e+07	1.05389
P60660	Myosin light polypeptide 6	23.989	49	6	41	6	MYL6	1.31429e+07	1.28555e+07	1.02236
P60520	Gamma-aminobutyric acid receptor-associated protein-like 2	4.497	13	2	11	2	GABARAPL2	2.3047e+06	1.94991e+06	1.18195
P60510	Serine/threonine-protein phosphatase 4 catalytic subunit	8.418	13	3	7	3	PPP4C	630226	883506	0.713324
P60228	Eukaryotic translation initiation factor 3 subunit E	56.982	40	16	92	16	EIF3E	7.99007e+06	7.30047e+06	1.09446
P60174	Triosephosphate isomerase	139.152	89	19	252	19	TPI1	1.18342e+08	1.15671e+08	1.02309
P59998	Actin-related protein 2/3 complex subunit 4	30.304	55	7	64	7	ARPC4	6.79304e+06	5.88017e+06	1.15525
P58107	Epiplakin	21.689	5	4	12	4	EPPK1	3.63328e+06	4.49089e+06	0.809033
P57678	Gem-associated protein 4	29.378	12	10	20	10	GEMIN4	1.73069e+06	1.38718e+06	1.24763
P57088	Transmembrane protein 33	11.013	13	3	13	3	TMEM33	1.25919e+06	1.68295e+06	0.748201
P56537	Eukaryotic translation initiation factor 6	13.02	17	3	15	3	EIF6	1.85584e+06	1.72944e+06	1.07309
P56385	ATP synthase subunit e, mitochondrial	4.525	30	2	8	2	ATP5ME	2.24482e+06	1.99739e+06	1.12387
P56211	cAMP-regulated phosphoprotein 19	18.731	38	4	15	3	ARPP19	4.65798e+06	5.22406e+06	0.89164
P56192	Methionine--tRNA ligase, cytoplasmic	62.652	18	14	61	14	MARS1	4.60512e+06	4.69932e+06	0.979954
P56134	ATP synthase subunit f, mitochondrial	14.942	40	3	23	3	ATP5MF	4.67755e+06	4.70304e+06	0.99458
P55957	BH3-interacting domain death agonist	47.966	61	8	36	8	BID	3.87034e+06	3.20734e+06	1.20671
P55884	Eukaryotic translation initiation factor 3 subunit B	104.136	30	20	153	20	EIF3B	1.52959e+07	1.54735e+07	0.988523
P55786	Puromycin-sensitive aminopeptidase	129.679	37	30	211	30	NPEPPS	6.48026e+07	6.2068e+07	1.04406
P55735	Protein SEC13 homolog	6.862	7	2	17	2	SEC13	9.07091e+06	8.37505e+06	1.08309
P55317	Hepatocyte nuclear factor 3-alpha	5.79	6	2	2	2	FOXA1	456692	406716	1.12288
P55263	Adenosine kinase	30.47	33	9	24	9	ADK	6.39002e+06	6.51781e+06	0.980394
P55212	Caspase-6	5.743	7	2	6	2	CASP6	704961	474007	1.48724
P55209	Nucleosome assembly protein 1-like 1	32.142	15	6	44	5	NAP1L1	8.17809e+06	8.33982e+06	0.980608
P55145	Mesencephalic astrocyte-derived neurotrophic factor	11.865	24	3	7	3	MANF	2.99533e+06	2.93163e+06	1.02173
P55084	Trifunctional enzyme subunit beta, mitochondrial	5.894	4	2	4	2	HADHB	1.01753e+06	858453	1.1853
P55072	Transitional endoplasmic reticulum ATPase	98.483	37	25	142	25	VCP	1.89954e+07	1.92102e+07	0.988818
P55060	Exportin-2	213.468	56	43	265	43	CSE1L	3.35355e+07	3.39357e+07	0.988209
P55036	26S proteasome non-ATPase regulatory subunit 4	8.91	10	3	8	3	PSMD4	476108	651865	0.730378
P55010	Eukaryotic translation initiation factor 5	10.134	8	3	10	3	EIF5	3.37982e+06	3.70101e+06	0.913215
P54886	Delta-1-pyrroline-5-carboxylate synthase	102.334	32	24	103	24	ALDH18A1	5.42329e+07	4.89268e+07	1.10845
P54819	Adenylate kinase 2, mitochondrial	28.216	46	8	24	8	AK2	1.2631e+07	1.14098e+07	1.10703
P54727	UV excision repair protein RAD23 homolog B	53.845	31	11	50	9	RAD23B	4.25189e+07	4.32016e+07	0.984198
P54725	UV excision repair protein RAD23 homolog A	41.368	33	10	33	8	RAD23A	1.88289e+07	1.63234e+07	1.15349
P54619	5'-AMP-activated protein kinase subunit gamma-1	5.919	8	2	6	2	PRKAG1	1.97484e+06	2.37471e+06	0.831614
P54578	Ubiquitin carboxyl-terminal hydrolase 14	24.877	20	8	32	8	USP14	3.6834e+06	3.77068e+06	0.976853
P54577	Tyrosine--tRNA ligase, cytoplasmic	22.386	16	9	36	9	YARS1	2.7484e+06	2.50391e+06	1.09764
P54136	Arginine--tRNA ligase, cytoplasmic	125.169	54	30	168	30	RARS1	2.76957e+07	2.06469e+07	1.3414
P53999	Activated RNA polymerase II transcriptional coactivator p15	32.571	44	8	61	8	SUB1	8.36186e+06	7.6976e+06	1.08629
P53990	IST1 homolog	10.255	12	4	8	4	IST1	3.92824e+06	3.38927e+06	1.15902
P53680	AP-2 complex subunit sigma	4.045	11	2	10	2	AP2S1	1.00447e+06	1.02836e+06	0.976773
P53634	Dipeptidyl peptidase 1	5.616	4	2	7	2	CTSC	774055	776441	0.996928
P53621	Coatomer subunit alpha	62.637	20	20	76	20	COPA	8.30907e+06	7.574e+06	1.09705
P53618	Coatomer subunit beta	48.512	21	14	35	14	COPB1	3.26503e+06	4.6737e+06	0.698598
P53396	ATP-citrate synthase	180.705	39	37	266	37	ACLY	5.3938e+07	4.98461e+07	1.08209
P53367	Arfaptin-1	12.824	9	2	12	2	ARFIP1	2.29133e+06	2.53795e+06	0.902829
P53004	Biliverdin reductase A	46.924	39	12	95	12	BLVRA	1.21013e+07	1.56531e+07	0.77309
P52943	Cysteine-rich protein 2	11.372	28	3	11	3	CRIP2	887190	848303	1.04584
P52895	Aldo-keto reductase family 1 member C2	6.174	11	2	10	2	AKR1C2	449057	410589	1.09369
P52789	Hexokinase-2	17.423	6	5	12	3	HK2	589234	698070	0.844091
P52788	Spermine synthase	7.106	5	2	11	2	SMS	620911	531573	1.16806
P52732	Kinesin-like protein KIF11	3.865	2	2	2	2	KIF11	531323	680077	0.78127
P52701	DNA mismatch repair protein Msh6	30.226	8	10	28	10	MSH6	3.61233e+06	2.61149e+06	1.38324
P52597	Heterogeneous nuclear ribonucleoprotein F	56.505	38	11	95	9	HNRNPF	3.75981e+07	3.26986e+07	1.14984
P52434	DNA-directed RNA polymerases I, II, and III subunit RPABC3	9.902	28	3	10	3	POLR2H	605942	503454	1.20357
P52294	Importin subunit alpha-5	17.473	11	5	12	5	KPNA1	569709	822628	0.692547
P52292	Importin subunit alpha-1	61.376	41	16	60	16	KPNA2	8.81909e+06	8.51543e+06	1.03566
P52272	Heterogeneous nuclear ribonucleoprotein M	98.494	40	25	139	25	HNRNPM	2.84516e+07	2.64853e+07	1.07424
P52209	6-phosphogluconate dehydrogenase, decarboxylating	59.872	31	13	84	13	PGD	1.66715e+07	1.30657e+07	1.27598
P51858	Hepatoma-derived growth factor	109.136	66	16	102	14	HDGF	6.55312e+07	6.61653e+07	0.990416
P51665	26S proteasome non-ATPase regulatory subunit 7	43.608	23	7	51	7	PSMD7	1.41133e+07	1.38701e+07	1.01754
P51659	Peroxisomal multifunctional enzyme type 2	51.252	23	14	52	14	HSD17B4	1.24645e+07	1.21786e+07	1.02348
P51649	Succinate-semialdehyde dehydrogenase, mitochondrial	21.991	9	5	12	5	ALDH5A1	8.88422e+06	9.92237e+06	0.895372
P51648	Aldehyde dehydrogenase family 3 member A2	17.683	14	6	10	6	ALDH3A2	4.67224e+06	6.77664e+06	0.689463
P51610	Host cell factor 1	53.125	10	14	28	14	HCFC1	448393	345349	1.29837
P51572	B-cell receptor-associated protein 31	4.825	7	2	17	2	BCAP31	3.53812e+06	3.4699e+06	1.01966
P51398	28S ribosomal protein S29, mitochondrial	10.195	11	3	7	3	DAP3	1.96099e+06	1.67015e+06	1.17414
P51149	Ras-related protein Rab-7a	38.241	57	10	48	10	RAB7A	1.53767e+07	1.42961e+07	1.07559
P51114	Fragile X mental retardation syndrome-related protein 1	97.182	43	22	63	20	FXR1	1.3494e+06	1.96694e+06	0.686036
P50995	Annexin A11	37.203	25	11	56	11	ANXA11	7.74536e+06	7.41773e+06	1.04417
P50991	T-complex protein 1 subunit delta	100.512	54	22	180	21	CCT4	3.27439e+07	3.11158e+07	1.05233
P50990	T-complex protein 1 subunit theta	92.672	46	22	196	22	CCT8	2.11315e+07	2.27314e+07	0.929617
P50914	60S ribosomal protein L14	50.638	30	8	88	8	RPL14	2.83077e+07	2.65041e+07	1.06805
P50897	Palmitoyl-protein thioesterase 1	22.52	16	4	12	4	PPT1	1.08432e+07	8.55352e+06	1.26769
P50579	Methionine aminopeptidase 2	20.792	18	6	12	6	METAP2	1.53931e+06	1.10914e+06	1.38784
P50570	Dynamin-2	34.253	12	10	45	10	DNM2	1.12665e+07	1.07375e+07	1.04927
P50552	Vasodilator-stimulated phosphoprotein	5.109	6	2	2	2	VASP	596011	595802	1.00035
P50454	Serpin H1	91.724	48	17	117	17	SERPINH1	2.75546e+07	2.55699e+07	1.07762
P50416	Carnitine O-palmitoyltransferase 1, liver isoform	67.375	26	16	74	16	CPT1A	1.51802e+07	1.39701e+07	1.08662
P50395	Rab GDP dissociation inhibitor beta	163.961	70	26	174	17	GDI2	4.69945e+07	4.8643e+07	0.966109
P50213	Isocitrate dehydrogenase [NAD] subunit alpha, mitochondrial	11.108	11	4	8	4	IDH3A	2.05638e+06	1.72523e+06	1.19194
P49915	GMP synthase [glutamine-hydrolyzing]	81.69	39	20	83	20	GMPS	7.40989e+06	8.35061e+06	0.887348
P49773	Adenosine 5'-monophosphoramidase HINT1	45.118	61	6	61	6	HINT1	9.6572e+06	1.08359e+07	0.891222
P49756	RNA-binding protein 25	46.618	17	13	41	13	RBM25	7.02602e+06	7.82172e+06	0.89827
P49755	Transmembrane emp24 domain-containing protein 10	18.34	18	4	19	4	TMED10	2.27034e+06	2.29304e+06	0.990098
P49736	DNA replication licensing factor MCM2	65.345	21	17	97	17	MCM2	8.28445e+06	7.52259e+06	1.10128
P49721	Proteasome subunit beta type-2	28.854	35	7	39	7	PSMB2	5.99557e+06	6.10551e+06	0.981993
P49720	Proteasome subunit beta type-3	25.039	32	6	27	6	PSMB3	2.99432e+06	2.05349e+06	1.45816
P49591	Serine--tRNA ligase, cytoplasmic	33.952	23	10	44	10	SARS1	3.62832e+06	4.68022e+06	0.775246
P49588	Alanine--tRNA ligase, cytoplasmic	123.988	33	25	139	25	AARS1	6.87309e+06	7.84545e+06	0.876061
P49419	Alpha-aminoadipic semialdehyde dehydrogenase	31.671	22	9	25	9	ALDH7A1	9.94588e+06	9.05334e+06	1.09859
P49411	Elongation factor Tu, mitochondrial	64.807	39	16	97	16	TUFM	4.97224e+07	4.27267e+07	1.16373
P49368	T-complex protein 1 subunit gamma	78.671	38	19	106	19	CCT3	7.16909e+07	7.52296e+07	0.952962
P49327	Fatty acid synthase	892.511	67	125	1572	124	FASN	3.98551e+08	3.90051e+08	1.02179
P49321	Nuclear autoantigenic sperm protein	5.479	2	2	12	2	NASP	875379	626937	1.39628
P49207	60S ribosomal protein L34	59.811	53	15	170	15	RPL34	1.06987e+08	1.08034e+08	0.990314
P49189	4-trimethylaminobutyraldehyde dehydrogenase	163.934	56	25	303	25	ALDH9A1	3.06219e+07	2.89087e+07	1.05926
P48735	Isocitrate dehydrogenase [NADP], mitochondrial	72.659	37	15	129	14	IDH2	5.00662e+07	4.25793e+07	1.17583
P48643	T-complex protein 1 subunit epsilon	97.86	44	23	108	22	CCT5	2.21536e+07	2.55136e+07	0.868306
P48637	Glutathione synthetase	10.851	8	4	10	4	GSS	8.69382e+06	7.99426e+06	1.08751
P48506	Glutamate--cysteine ligase catalytic subunit	38.334	14	9	28	9	GCLC	4.30054e+06	4.7279e+06	0.909611
P48444	Coatomer subunit delta	37.137	27	11	54	11	ARCN1	4.58404e+06	4.048e+06	1.13242
P48200	Iron-responsive element-binding protein 2	5.472	2	2	10	2	IREB2	3.23044e+06	3.74178e+06	0.863344
P48147	Prolyl endopeptidase	42.605	20	11	26	11	PREP	2.80383e+06	3.23217e+06	0.867477
P48047	ATP synthase subunit O, mitochondrial	11.605	20	3	8	3	ATP5PO	1.70759e+06	1.90221e+06	0.897684
P47914	60S ribosomal protein L29	62.651	50	14	130	14	RPL29	7.3071e+07	8.5901e+07	0.850642
P47897	Glutamine--tRNA ligase	58.104	25	17	74	17	QARS1	9.93311e+06	1.00925e+07	0.984209
P47813	Eukaryotic translation initiation factor 1A, X-chromosomal	6.776	15	2	6	2	EIF1AX	738504	604774	1.22112
P46977	Dolichyl-diphosphooligosaccharide--protein glycosyltransferase subunit STT3A	20.502	11	7	18	7	STT3A	3.17338e+06	3.6117e+06	0.878637
P46976	Glycogenin-1	4.856	6	2	3	2	GYG1	2.69908e+06	2.24608e+06	1.20168
P46940	Ras GTPase-activating-like protein IQGAP1	67.173	13	19	66	16	IQGAP1	5.81528e+06	4.43366e+06	1.31162
P46926	Glucosamine-6-phosphate isomerase 1	8.369	12	3	10	3	GNPDA1	436747	590162	0.740046
P46783	40S ribosomal protein S10	64.595	62	11	104	11	RPS10	3.64835e+07	3.63623e+07	1.00333
P46782	40S ribosomal protein S5	88.035	61	9	91	9	RPS5	2.42113e+07	2.4175e+07	1.0015
P46781	40S ribosomal protein S9	110.24	59	28	444	28	RPS9	2.45437e+08	2.3088e+08	1.06305
P46779	60S ribosomal protein L28	129.82	86	29	312	29	RPL28	2.42517e+08	2.63126e+08	0.921677
P46778	60S ribosomal protein L21	102.916	66	17	212	17	RPL21	1.44019e+08	1.30874e+08	1.10045
P46777	60S ribosomal protein L5	81.76	58	18	148	18	RPL5	1.64439e+07	1.93597e+07	0.849385
P46776	60S ribosomal protein L27a	55.18	53	11	183	11	RPL27A	1.24368e+08	1.13425e+08	1.09648
P46459	Vesicle-fusing ATPase	4.399	3	2	3	2	NSF	705759	618094	1.14183
P46379	Large proline-rich protein BAG6	19.083	7	7	18	7	BAG6	2.00749e+06	2.06666e+06	0.971368
P46109	Crk-like protein	45.528	39	10	46	10	CRKL	9.98077e+06	8.20663e+06	1.21618
P46063	ATP-dependent DNA helicase Q1	7.842	4	2	3	2	RECQL	299324	225239	1.32892
P46060	Ran GTPase-activating protein 1	15.099	9	5	19	5	RANGAP1	5.88295e+06	5.487e+06	1.07216
P45974	Ubiquitin carboxyl-terminal hydrolase 5	70.827	30	18	78	18	USP5	1.31313e+07	1.04708e+07	1.25408
P45973	Chromobox protein homolog 5	18.737	32	6	20	5	CBX5	2.11722e+06	2.03192e+06	1.04198
P45880	Voltage-dependent anion-selective channel protein 2	71.505	50	12	98	12	VDAC2	4.23017e+07	3.12274e+07	1.35463
P45877	Peptidyl-prolyl cis-trans isomerase C	6.379	10	2	7	2	PPIC	1.04029e+06	720280	1.44428
P43897	Elongation factor Ts, mitochondrial	8.07	10	3	6	3	TSFM	2.89627e+06	2.24189e+06	1.29189
P43490	Nicotinamide phosphoribosyltransferase	57.831	42	17	69	17	NAMPT	6.74909e+06	8.46348e+06	0.797437
P43487	Ran-specific GTPase-activating protein	9.184	13	3	20	3	RANBP1	9.48215e+06	8.64196e+06	1.09722
P43246	DNA mismatch repair protein Msh2	42.165	17	14	48	14	MSH2	4.24644e+06	3.14964e+06	1.34823
P43243	Matrin-3	66.923	27	17	73	17	MATR3	2.241e+07	2.37737e+07	0.942639
P43034	Platelet-activating factor acetylhydrolase IB subunit beta	4.485	5	2	2	2	PAFAH1B1	459613	399799	1.14961
P42766	60S ribosomal protein L35	52.66	33	8	194	8	RPL35	1.20412e+08	1.05887e+08	1.13718
P42765	3-ketoacyl-CoA thiolase, mitochondrial	90.035	47	16	80	16	ACAA2	8.47442e+07	1.07638e+08	0.787306
P42704	Leucine-rich PPR motif-containing protein, mitochondrial	93.82	22	26	99	26	LRPPRC	2.7763e+07	3.0905e+07	0.898336
P42677	40S ribosomal protein S27	19.701	40	5	36	5	RPS27	5.68524e+06	6.88573e+06	0.825654
P42575	Caspase-2	19.419	16	4	6	4	CASP2	1.23691e+06	1.00694e+06	1.22838
P42224	Signal transducer and activator of transcription 1-alpha/beta	89.436	31	19	68	19	STAT1	7.19937e+06	7.77112e+06	0.926427
P42166	Lamina-associated polypeptide 2, isoform alpha	76.332	29	15	73	10	TMPO	1.30182e+07	1.15082e+07	1.13121
P42126	Enoyl-CoA delta isomerase 1, mitochondrial	5.305	7	2	5	2	ECI1	378434	542447	0.697641
P41252	Isoleucine--tRNA ligase, cytoplasmic	66.713	20	23	88	23	IARS1	8.48503e+06	8.77231e+06	0.967252
P41250	Glycine--tRNA ligase	63.778	26	16	45	16	GARS1	1.04129e+07	9.81802e+06	1.06059
P41240	Tyrosine-protein kinase CSK	38.338	33	14	36	14	CSK	5.31185e+06	5.0936e+06	1.04285
P41223	Protein BUD31 homolog	13.024	13	4	18	4	BUD31	1.74973e+06	1.42218e+06	1.23032
P41091	Eukaryotic translation initiation factor 2 subunit 3	61.036	44	15	84	15	EIF2S3	8.53263e+06	6.27675e+06	1.3594
P40939	Trifunctional enzyme subunit alpha, mitochondrial	9.205	5	3	4	3	HADHA	532791	525254	1.01435
P40937	Replication factor C subunit 5	16.67	12	3	9	3	RFC5	5.32452e+06	3.99164e+06	1.33392
P40926	Malate dehydrogenase, mitochondrial	110.706	62	18	321	18	MDH2	1.4626e+08	1.39793e+08	1.04626
P40925	Malate dehydrogenase, cytoplasmic	54.56	38	11	88	11	MDH1	1.26056e+07	1.15846e+07	1.08814
P40818	Ubiquitin carboxyl-terminal hydrolase 8	28.009	10	9	28	9	USP8	2.54476e+06	2.44902e+06	1.03909
P40616	ADP-ribosylation factor-like protein 1	6.95	11	2	20	2	ARL1	1.43498e+06	1.66574e+06	0.861465
P40429	60S ribosomal protein L13a	186.574	76	33	673	33	RPL13A	3.00782e+08	2.97746e+08	1.0102
P40227	T-complex protein 1 subunit zeta	92.932	47	21	105	21	CCT6A	1.46553e+07	1.7162e+07	0.853937
P39748	Flap endonuclease 1	34.94	28	9	54	9	FEN1	7.0003e+06	9.27527e+06	0.754727
P39687	Acidic leucine-rich nuclear phosphoprotein 32 family member A	33.048	29	9	48	5	ANP32A	2.95319e+06	2.95685e+06	0.998764
P39656	Dolichyl-diphosphooligosaccharide--protein glycosyltransferase 48 kDa subunit	12.317	9	4	18	4	DDOST	1.61979e+07	1.69221e+07	0.957202
P39023	60S ribosomal protein L3	106.226	44	19	167	16	RPL3	5.37492e+07	5.04426e+07	1.06555
P39019	40S ribosomal protein S19	61.181	48	11	158	11	RPS19	3.1819e+07	3.10136e+07	1.02597
P38919	Eukaryotic initiation factor 4A-III	69.795	45	18	123	14	EIF4A3	1.71033e+07	1.60583e+07	1.06508
P38646	Stress-70 protein, mitochondrial	91.325	37	23	107	23	HSPA9	4.46806e+07	4.08578e+07	1.09356
P38606	V-type proton ATPase catalytic subunit A	185.958	53	28	301	28	ATP6V1A	1.50809e+08	1.32888e+08	1.13486
P38159	RNA-binding motif protein, X chromosome	25.228	19	7	34	7	RBMX	4.62918e+06	4.63232e+06	0.999323
P38117	Electron transfer flavoprotein subunit beta	22.544	29	7	46	7	ETFB	1.01189e+07	9.83637e+06	1.02873
P37837	Transaldolase	38.004	33	11	83	11	TALDO1	1.44154e+07	1.56371e+07	0.921872
P37802	Transgelin-2	59.827	69	13	85	13	TAGLN2	1.89687e+07	1.7817e+07	1.06464
P37108	Signal recognition particle 14 kDa protein	18.32	28	4	21	4	SRP14	4.78344e+06	3.19231e+06	1.49843
P36969	Phospholipid hydroperoxide glutathione peroxidase	6.907	16	3	9	3	GPX4	910900	931461	0.977926
P36776	Lon protease homolog, mitochondrial	12.064	5	4	9	4	LONP1	1.57424e+06	1.23501e+06	1.27468
P36639	Oxidized purine nucleoside triphosphate hydrolase	7.802	15	2	9	2	NUDT1	2.91006e+06	2.81898e+06	1.03231
P36578	60S ribosomal protein L4	234.73	65	35	428	35	RPL4	1.19681e+08	1.14382e+08	1.04633
P36542	ATP synthase subunit gamma, mitochondrial	7.633	7	2	8	2	ATP5F1C	3.22182e+06	2.65824e+06	1.21201
P36405	ADP-ribosylation factor-like protein 3	5.685	12	2	3	2	ARL3	3.27082e+06	3.28345e+06	0.996154
P35998	26S proteasome regulatory subunit 7	47.538	31	15	46	15	PSMC2	5.22395e+06	6.56167e+06	0.79613
P35659	Protein DEK	56.939	37	13	84	13	DEK	1.8064e+07	1.75776e+07	1.02767
P35637	RNA-binding protein FUS	23.585	14	6	27	6	FUS	3.80497e+06	3.0657e+06	1.24114
P35606	Coatomer subunit beta'	22.688	10	8	27	8	COPB2	1.74797e+06	2.21224e+06	0.790136
P35579	Myosin-9	204.316	27	48	203	42	MYH9	2.51336e+08	2.52215e+08	0.996514
P35573	Glycogen debranching enzyme	3.618	2	2	5	2	AGL	3.25262e+07	3.64183e+07	0.893129
P35520	Cystathionine beta-synthase	23.669	15	6	28	6	CBS	3.31992e+06	3.83276e+06	0.866194
P35270	Sepiapterin reductase	83.239	62	13	84	13	SPR	4.22525e+06	3.97051e+06	1.06416
P35268	60S ribosomal protein L22	35.152	58	8	57	6	RPL22	2.36935e+07	2.30747e+07	1.02681
P35244	Replication protein A 14 kDa subunit	10.047	22	2	6	2	RPA3	1.25975e+06	1.13559e+06	1.10934
P35237	Serpin B6	53.677	42	14	72	14	SERPINB6	1.77255e+07	1.49561e+07	1.18517
P35232	Prohibitin	14.337	21	5	9	5	PHB1	1.94148e+06	1.85287e+06	1.04782
P35222	Catenin beta-1	3.816	2	2	5	2	CTNNB1	343055	347096	0.988358
P35221	Catenin alpha-1	43.833	19	15	45	10	CTNNA1	5.50932e+06	7.42351e+06	0.742144
P35080	Profilin-2	18.341	26	4	21	4	PFN2	3.30263e+06	3.57465e+06	0.923903
P34932	Heat shock 70 kDa protein 4	108.323	40	25	95	23	HSPA4	1.03772e+07	1.12266e+07	0.924348
P34897	Serine hydroxymethyltransferase, mitochondrial	47.584	32	13	74	12	SHMT2	2.21856e+07	2.0215e+07	1.09748
P34896	Serine hydroxymethyltransferase, cytosolic	9.683	9	4	8	3	SHMT1	3.10658e+06	2.91337e+06	1.06632
P33993	DNA replication licensing factor MCM7	105.432	39	24	141	24	MCM7	1.59624e+07	1.70447e+07	0.936505
P33992	DNA replication licensing factor MCM5	31.292	15	9	40	9	MCM5	2.16813e+06	2.77331e+06	0.781782
P33991	DNA replication licensing factor MCM4	57.638	23	18	52	18	MCM4	4.96984e+06	7.30465e+06	0.680366
P33947	ER lumen protein-retaining receptor 2	32.828	35	5	39	4	KDELR2	7.8896e+06	5.31346e+06	1.48483
P33176	Kinesin-1 heavy chain	55.62	18	13	45	13	KIF5B	1.27842e+06	1.07289e+06	1.19157
P32969	60S ribosomal protein L9	83.49	69	13	109	13	RPL9; RPL9P7; RPL9P8; RPL9P9	1.79836e+07	1.4956e+07	1.20243
P32322	Pyrroline-5-carboxylate reductase 1, mitochondrial	12.468	16	4	18	4	PYCR1	4.54252e+06	4.19051e+06	1.084
P32119	Peroxiredoxin-2	72.382	70	16	169	15	PRDX2	1.10678e+08	1.03963e+08	1.06459
P31948	Stress-induced-phosphoprotein 1	61.604	30	17	116	17	STIP1	2.38476e+07	2.22342e+07	1.07257
P31947	14-3-3 protein sigma	64.954	41	11	83	8	SFN	2.01633e+07	1.87334e+07	1.07633
P31946	14-3-3 protein beta/alpha	69.199	54	13	106	5	YWHAB	6.28226e+06	7.48275e+06	0.839565
P31943	Heterogeneous nuclear ribonucleoprotein H	53.424	27	9	96	3	HNRNPH1	1.38117e+07	1.22434e+07	1.12809
P31942	Heterogeneous nuclear ribonucleoprotein H3	15.966	13	4	18	3	HNRNPH3	1.16285e+06	1.33535e+06	0.870818
P31939	Bifunctional purine biosynthesis protein ATIC	151.357	65	30	234	30	ATIC	3.22206e+07	3.52543e+07	0.913949
P31749	RAC-alpha serine/threonine-protein kinase	45.1	23	9	50	6	AKT1	6.9065e+07	6.78299e+07	1.01821
P31689	DnaJ homolog subfamily A member 1	27.837	23	6	31	6	DNAJA1	3.27519e+06	2.46108e+06	1.33079
P31350	Ribonucleoside-diphosphate reductase subunit M2	15.268	16	6	19	5	RRM2	1.10412e+07	9.9599e+06	1.10857
P31153	S-adenosylmethionine synthase isoform type-2	49.01	40	12	62	12	MAT2A	6.29764e+06	6.57182e+06	0.958278
P30876	DNA-directed RNA polymerase II subunit RPB2	31.784	13	11	24	11	POLR2B	467072	365417	1.27819
P30837	Aldehyde dehydrogenase X, mitochondrial	56.908	33	13	54	13		2.1717e+07	2.35087e+07	0.923788
P30519	Heme oxygenase 2	108.576	60	16	115	16	HMOX2	3.48343e+07	3.28396e+07	1.06074
P30153	Serine/threonine-protein phosphatase 2A 65 kDa regulatory subunit A alpha isoform	133.761	42	20	133	20	PPP2R1A	2.52149e+07	2.41141e+07	1.04565
P30101	Protein disulfide-isomerase A3	156.49	54	25	169	25	PDIA3	2.0506e+08	2.02607e+08	1.01211
P30086	Phosphatidylethanolamine-binding protein 1	66.036	80	11	83	11	PEBP1	2.79614e+07	2.73573e+07	1.02208
P30085	UMP-CMP kinase	20.678	27	5	23	5	CMPK1	3.48839e+06	2.96498e+06	1.17653
P30084	Enoyl-CoA hydratase, mitochondrial	60.318	39	10	54	10	ECHS1	3.51207e+07	3.18323e+07	1.1033
P30050	60S ribosomal protein L12	35.526	55	6	94	6	RPL12	1.31522e+07	1.18328e+07	1.1115
P30048	Thioredoxin-dependent peroxide reductase, mitochondrial	44.229	41	8	46	8	PRDX3	4.44824e+07	4.07578e+07	1.09138
P30046	D-dopachrome decarboxylase	22.685	37	4	40	4	DDT	4.33957e+06	4.65955e+06	0.931328
P30044	Peroxiredoxin-5, mitochondrial	22.097	37	6	22	6	PRDX5	6.55396e+06	6.88091e+06	0.952484
P30043	Flavin reductase (NADPH)	40.743	56	8	60	8	BLVRB	1.67612e+07	1.70303e+07	0.984198
P30041	Peroxiredoxin-6	113.143	82	18	155	18	PRDX6	1.43994e+08	1.27173e+08	1.13226
P30040	Endoplasmic reticulum resident protein 29	22.121	26	7	29	7	ERP29	1.51055e+07	1.41695e+07	1.06606
P30038	Delta-1-pyrroline-5-carboxylate dehydrogenase, mitochondrial	4.45	4	2	3	2	ALDH4A1	1.9553e+06	1.61651e+06	1.20958
P29692	Elongation factor 1-delta	35.368	37	8	76	8	EEF1D	7.76653e+06	7.75586e+06	1.00138
P29401	Transketolase	256.075	64	37	335	37	TKT	4.91324e+08	5.21907e+08	0.9414
P29373	Cellular retinoic acid-binding protein 2	48.167	56	9	120	9	CRABP2	2.5367e+07	2.59577e+07	0.977244
P28074	Proteasome subunit beta type-5	41.487	32	11	54	11	PSMB5	4.58525e+06	4.43322e+06	1.03429
P28072	Proteasome subunit beta type-6	8.224	13	3	21	3	PSMB6	4.14354e+06	4.36894e+06	0.948409
P27824	Calnexin	44.526	19	11	57	11	CANX	1.57892e+07	1.72786e+07	0.913802
P27797	Calreticulin	60.092	38	13	72	13	CALR	4.30936e+07	4.16557e+07	1.03452
P27708	CAD protein	127.759	18	31	132	31	CAD	1.35243e+07	1.50694e+07	0.897467
P27695	DNA-(apurinic or apyrimidinic site) endonuclease	42.579	37	8	39	8	APEX1	2.25837e+06	2.9184e+06	0.773839
P27635	60S ribosomal protein L10	52.293	49	12	113	12	LOC100768740; LOC101344695; LOC105294701; LOC112632580; Rpl10; RPL10	1.74781e+07	2.20589e+07	0.792336
P27348	14-3-3 protein theta	78.157	53	13	92	9	YWHAQ	1.78935e+07	1.77493e+07	1.00812
P26641	Elongation factor 1-gamma	127.42	47	22	285	22	EEF1G	7.15216e+07	7.4041e+07	0.965972
P26640	Valine--tRNA ligase	98.281	27	26	136	26	VARS1	8.90867e+06	9.32712e+06	0.955136
P26639	Threonine--tRNA ligase 1, cytoplasmic	59.987	30	19	80	19	TARS1	1.02406e+07	1.03306e+07	0.991287
P26599	Polypyrimidine tract-binding protein 1	109.595	40	15	133	13	PTBP1	2.49572e+07	2.75907e+07	0.904551
P26583	High mobility group protein B2	50.735	45	9	74	6	HMGB2	7.294e+06	8.02525e+06	0.908882
P26373	60S ribosomal protein L13	127.858	65	22	297	22	RPL13	2.5119e+08	2.65659e+08	0.945536
P26368	Splicing factor U2AF 65 kDa subunit	37.355	13	7	44	7	U2AF2	7.41579e+06	8.20633e+06	0.903668
P25815	Protein S100-P	8.099	24	2	11	2	S100P	3.18888e+06	3.05175e+06	1.04493
P25789	Proteasome subunit alpha type-4	30.343	38	7	40	7	PSMA4	3.68555e+06	2.83361e+06	1.30065
P25788	Proteasome subunit alpha type-3	25.539	26	5	27	5	PSMA3	3.63027e+06	3.63102e+06	0.999792
P25787	Proteasome subunit alpha type-2	33.476	46	8	22	8	PSMA2	4.52996e+06	3.47113e+06	1.30504
P25786	Proteasome subunit alpha type-1	54.619	39	11	113	11	PSMA1	1.91414e+07	1.94587e+07	0.983692
P25705	ATP synthase subunit alpha, mitochondrial	84.135	35	17	132	17	ATP5F1A	3.60067e+07	3.03185e+07	1.18762
P25685	DnaJ homolog subfamily B member 1	8.518	9	3	14	3	DNAJB1	2.15114e+06	1.45805e+06	1.47536
P25398	40S ribosomal protein S12	35.664	54	7	45	7	RPS12	2.00339e+07	1.87089e+07	1.07082
P25205	DNA replication licensing factor MCM3	71.971	31	21	63	21	MCM3	7.11399e+06	9.41473e+06	0.755624
P24752	Acetyl-CoA acetyltransferase, mitochondrial	12.659	10	4	7	4	ACAT1	1.2418e+06	1.35703e+06	0.915091
P24666	Low molecular weight phosphotyrosine protein phosphatase	23.248	46	6	31	6	ACP1	2.16688e+06	2.88887e+06	0.750079
P24534	Elongation factor 1-beta	15.554	16	3	32	3	EEF1B2	6.69213e+06	7.00417e+06	0.955449
P24390	ER lumen protein-retaining receptor 1	22.22	19	3	37	2	KDELR1	4.03927e+06	3.51277e+06	1.14988
P23921	Ribonucleoside-diphosphate reductase large subunit	90.144	30	21	85	21	RRM1	7.58287e+06	8.02308e+06	0.945132
P23588	Eukaryotic translation initiation factor 4B	36.662	16	6	18	6	EIF4B	2.15176e+07	2.80666e+07	0.766663
P23528	Cofilin-1	239.153	83	21	380	18	CFL1	2.68622e+08	2.63891e+08	1.01793
P23526	Adenosylhomocysteinase	95.249	44	21	226	20	AHCY	4.47512e+07	4.33116e+07	1.03324
P23443	Ribosomal protein S6 kinase beta-1	39.266	18	8	41	7	RPS6KB1	7.88406e+06	6.21545e+06	1.26846
P23396	40S ribosomal protein S3	101.071	85	24	258	24	RPS3	4.55104e+07	4.3206e+07	1.05333
P23381	Tryptophan--tRNA ligase, cytoplasmic	48.14	35	11	52	11	WARS1	2.82626e+06	3.24977e+06	0.869679
P23284	Peptidyl-prolyl cis-trans isomerase B	112.074	64	20	230	20	PPIB	1.60718e+08	1.55661e+08	1.03249
P23246	Splicing factor, proline- and glutamine-rich	58.341	22	15	46	14	SFPQ	9.9738e+06	1.01645e+07	0.981238
P23193	Transcription elongation factor A protein 1	15.086	18	5	6	5	TCEA1	771428	706767	1.09149
P22626	Heterogeneous nuclear ribonucleoproteins A2/B1	105.374	61	21	186	18	HNRNPA2B1	2.87706e+07	3.65849e+07	0.786408
P22392	Nucleoside diphosphate kinase B	105.466	92	17	272	6	NME2	1.33229e+08	1.27215e+08	1.04728
P22314	Ubiquitin-like modifier-activating enzyme 1	145.623	39	28	167	28	UBA1	5.47482e+07	5.50067e+07	0.9953
P22307	Sterol carrier protein 2	9.026	7	4	12	4	SCP2	952975	971328	0.981105
P22234	Multifunctional protein ADE2	101.313	59	22	130	22	PAICS	2.22182e+07	2.28389e+07	0.972826
P22102	Trifunctional purine biosynthetic protein adenosine-3	79.619	27	19	73	19	GART	8.88789e+06	7.40168e+06	1.20079
P22087	rRNA 2'-O-methyltransferase fibrillarin	30.9	28	7	43	7	FBL	8.87036e+06	8.39673e+06	1.05641
P22061	Protein-L-isoaspartate(D-aspartate) O-methyltransferase	17.424	23	5	18	5	PCMT1	5.44763e+06	5.3968e+06	1.00942
P21964	Catechol O-methyltransferase	82.414	64	11	65	11	COMT	1.01159e+07	1.05453e+07	0.95928
P21333	Filamin-A	214.745	31	57	202	53	FLNA	2.30917e+07	2.32291e+07	0.994086
P21266	Glutathione S-transferase Mu 3	85.345	63	15	162	15	GSTM3	5.34383e+07	4.96743e+07	1.07577
P20839	Inosine-5'-monophosphate dehydrogenase 1	25.941	25	8	28	7	IMPDH1	946006	889330	1.06373
P20700	Lamin-B1	29.994	17	10	43	9	LMNB1	3.49528e+06	4.73296e+06	0.738497
P20674	Cytochrome c oxidase subunit 5A, mitochondrial	4.293	11	2	9	2	COX5A	2.17533e+06	1.65893e+06	1.31129
P20618	Proteasome subunit beta type-1	34.473	37	8	41	8	PSMB1	3.76923e+06	4.62985e+06	0.814114
P20073	Annexin A7	20.84	15	6	21	6	ANXA7	2.8623e+06	2.20918e+06	1.29564
P20042	Eukaryotic translation initiation factor 2 subunit 2	28.292	26	8	36	8	EIF2S2	4.60877e+06	4.19837e+06	1.09775
P19784	Casein kinase II subunit alpha'	13.036	17	4	8	4	CSNK2A2	682998	866786	0.787966
P19623	Spermidine synthase	11.621	17	4	17	4	SRM	2.11285e+06	2.13556e+06	0.989366
P19525	Interferon-induced, double-stranded RNA-activated protein kinase	23.005	16	7	18	7	EIF2AK2	3.7395e+06	3.84111e+06	0.973548
P19367	Hexokinase-1	69.138	25	20	65	18	HK1	9.06474e+06	7.20191e+06	1.25866
P19338	Nucleolin	268.591	43	46	555	46	NCL	1.5462e+08	1.63728e+08	0.944367
P18754	Regulator of chromosome condensation	5.838	8	3	12	3	RCC1	2.68018e+06	2.25953e+06	1.18617
P18669	Phosphoglycerate mutase 1	75.358	60	12	135	12	PGAM1	5.35963e+07	4.67228e+07	1.14711
P18621	60S ribosomal protein L17	98.712	68	14	199	14	RPL17	4.40879e+07	4.05196e+07	1.08806
P18206	Vinculin	29.956	10	10	24	10	VCL	1.42246e+06	1.22432e+06	1.16184
P18124	60S ribosomal protein L7	141.502	65	24	295	24	RPL7	1.46143e+08	1.38464e+08	1.05546
P18085	ADP-ribosylation factor 4	58.771	56	9	81	5	ARF4	4.68473e+06	4.71503e+06	0.993573
P18077	60S ribosomal protein L35a	53.35	67	16	185	16	RPL35A	7.60306e+07	7.96281e+07	0.95482
P17987	T-complex protein 1 subunit alpha	106.359	38	20	193	20	TCP1	1.89992e+07	1.73332e+07	1.09612
P17980	26S proteasome regulatory subunit 6A	10.202	10	3	7	3	PSMC3	468299	618645	0.756975
P17858	ATP-dependent 6-phosphofructokinase, liver type	86.37	33	20	105	16	PFKL	1.52236e+07	1.37329e+07	1.10855
P17844	Probable ATP-dependent RNA helicase DDX5	89.008	40	24	166	16	DDX5	2.37713e+07	2.14842e+07	1.10645
P17174	Aspartate aminotransferase, cytoplasmic	92.265	57	18	86	18	GOT1	8.67348e+07	8.61842e+07	1.00639
P16949	Stathmin	19.595	39	6	19	6	STMN1	1.13192e+07	1.22293e+07	0.925577
P16930	Fumarylacetoacetase	11.739	8	3	18	3	FAH	1.1084e+06	1.22995e+06	0.901173
P16615	Sarcoplasmic/endoplasmic reticulum calcium ATPase 2	108.493	30	27	118	23	ATP2A2	3.07412e+07	3.34361e+07	0.919401
P16455	Methylated-DNA--protein-cysteine methyltransferase	62.84	48	7	70	7	MGMT	3.76543e+07	3.872e+07	0.972477
P16435	NADPH--cytochrome P450 reductase	6.201	3	2	5	2	POR	773292	951585	0.812636
P16403	Histone H1.2	127.238	46	19	238	3	H1-2	6.11493e+06	6.10337e+06	1.00189
P16401	Histone H1.5	114.272	41	20	231	15	H1-5	6.59134e+07	6.44565e+07	1.0226
P16152	Carbonyl reductase [NADPH] 1	76.197	75	17	98	17	CBR1	1.5824e+07	1.50702e+07	1.05002
P15924	Desmoplakin	53.89	8	20	43	20	DSP	3.9649e+06	3.6847e+06	1.07604
P15880	40S ribosomal protein S2	64.945	44	12	144	12	RPS2	2.39063e+07	2.20806e+07	1.08268
P15586	N-acetylglucosamine-6-sulfatase	11.69	8	4	8	4	GNS	2.80365e+06	3.01449e+06	0.930058
P15559	NAD(P)H dehydrogenase [quinone] 1	61.903	38	12	163	12	NQO1	3.16155e+07	3.21227e+07	0.984211
P15531	Nucleoside diphosphate kinase A	78.817	73	11	226	5	NME1	1.82071e+07	1.80465e+07	1.0089
P15311	Ezrin	60.423	26	16	94	15	EZR	2.26017e+07	1.86217e+07	1.21373
P15170	Eukaryotic peptide chain release factor GTP-binding subunit ERF3A	39.773	17	9	78	9	GSPT1	1.43992e+07	1.45669e+07	0.988494
P14923	Junction plakoglobin	11.449	5	3	9	3	JUP	1.52681e+06	1.45655e+06	1.04824
P14868	Aspartate--tRNA ligase, cytoplasmic	78.934	51	22	129	22	DARS1	1.77883e+07	1.90543e+07	0.933561
P14866	Heterogeneous nuclear ribonucleoprotein L	54.008	31	12	88	11	HNRNPL	8.25317e+06	6.7792e+06	1.21742
P14735	Insulin-degrading enzyme	28.12	12	11	27	11	IDE	1.87263e+06	1.56838e+06	1.19399
P14678	Small nuclear ribonucleoprotein-associated proteins B and B'	8.453	7	3	27	3	SNRPB	8.10877e+06	7.75035e+06	1.04624
P14625	Endoplasmin	98.992	32	22	178	20	HSP90B1	4.14908e+07	4.24934e+07	0.976405
P14618	Pyruvate kinase PKM	408.536	87	48	701	46	PKM	2.48899e+08	2.34584e+08	1.06102
P14324	Farnesyl pyrophosphate synthase	20.597	15	6	37	6	FDPS	2.47467e+07	2.54384e+07	0.972807
P14314	Glucosidase 2 subunit beta	45.876	24	13	34	13	PRKCSH	2.18875e+07	2.4543e+07	0.891802
P14174	Macrophage migration inhibitory factor	24.061	23	4	104	4	MIF	2.60974e+07	2.59267e+07	1.00658
P13807	Glycogen [starch] synthase, muscle	14.833	9	5	7	5	GYS1	792898	670747	1.18211
P13804	Electron transfer flavoprotein subunit alpha, mitochondrial	30.74	25	5	18	5	ETFA	8.1952e+06	8.40987e+06	0.974474
P13798	Acylamino-acid-releasing enzyme	16.266	7	5	13	5	APEH	2.56028e+06	2.44411e+06	1.04753
P13797	Plastin-3	77.602	30	16	90	10	PLS3	1.25746e+07	1.19665e+07	1.05082
P13796	Plastin-2	109.926	56	26	93	20	LCP1	1.69114e+07	1.48747e+07	1.13693
P13693	Translationally-controlled tumor protein	15.328	34	5	27	5	TPT1	1.49585e+07	1.33263e+07	1.12248
P13667	Protein disulfide-isomerase A4	215.151	59	42	248	42	PDIA4	3.01503e+08	2.89003e+08	1.04325
P13639	Elongation factor 2	433.42	72	63	837	62	EEF2	2.51365e+08	2.4406e+08	1.02993
P13489	Ribonuclease inhibitor	34.512	27	9	34	9	RNH1	3.10543e+06	2.86094e+06	1.08546
P13010	X-ray repair cross-complementing protein 5	95.117	36	24	136	24	XRCC5	2.27925e+07	2.17059e+07	1.05006
P12956	X-ray repair cross-complementing protein 6	107.438	48	26	123	26	XRCC6	2.7925e+07	2.652e+07	1.05298
P12955	Xaa-Pro dipeptidase	17.187	12	6	8	6	PEPD	657780	473220	1.39001
P12814	Alpha-actinin-1	118	30	23	150	9	ACTN1	3.6212e+06	4.49493e+06	0.805619
P12532	Creatine kinase U-type, mitochondrial	64.908	39	12	112	12	CKMT1A; CKMT1B	3.34412e+08	3.13984e+08	1.06506
P12270	Nucleoprotein TPR	8.435	2	4	10	4	TPR	8.38799e+06	6.41036e+06	1.30851
P12268	Inosine-5'-monophosphate dehydrogenase 2	107.721	45	19	132	18	IMPDH2	8.49787e+07	7.63773e+07	1.11262
P12236	ADP/ATP translocase 3	42.844	39	12	112	3	SLC25A6	949222	704484	1.3474
P12235	ADP/ATP translocase 1	33.842	26	9	86	2	SLC25A4	4.02436e+06	3.98642e+06	1.00952
P12081	Histidine--tRNA ligase, cytoplasmic	67.137	37	20	66	20	HARS1	1.20993e+07	1.15121e+07	1.05101
P12004	Proliferating cell nuclear antigen	25.681	29	7	53	7	PCNA	9.05474e+06	8.40608e+06	1.07717
P11940	Polyadenylate-binding protein 1	110.15	38	26	195	17	PABPC1	3.13299e+07	3.04561e+07	1.02869
P11766	Alcohol dehydrogenase class-3	19.522	18	6	23	6	ADH5	1.23224e+07	1.17104e+07	1.05226
P11586	C-1-tetrahydrofolate synthase, cytoplasmic	162.933	44	35	278	35	MTHFD1	4.12798e+07	3.75272e+07	1.1
P11498	Pyruvate carboxylase, mitochondrial	240.13	56	47	302	47	PC	3.90778e+07	3.33155e+07	1.17296
P11413	Glucose-6-phosphate 1-dehydrogenase	277.159	78	42	646	42	G6PD	2.64577e+08	2.4939e+08	1.06089
P11388	DNA topoisomerase 2-alpha	23.65	6	7	16	7	TOP2A	656316	550702	1.19178
P11387	DNA topoisomerase 1	40.014	16	12	39	12	TOP1	7.55154e+06	7.91819e+06	0.953695
P11216	Glycogen phosphorylase, brain form	168.849	49	34	171	27	PYGB	3.26593e+07	2.93359e+07	1.11329
P11172	Uridine 5'-monophosphate synthase	26.366	20	8	24	8	UMPS	2.0166e+06	2.29576e+06	0.878402
P11142	Heat shock cognate 71 kDa protein	208.577	56	35	378	28	HSPA8	1.56768e+08	1.58901e+08	0.986578
P11021	Endoplasmic reticulum chaperone BiP	139.97	45	30	163	28	HSPA5	9.05361e+07	8.69276e+07	1.04151
P10809	60 kDa heat shock protein, mitochondrial	238.437	69	40	300	40	HSPD1	3.20393e+08	3.26416e+08	0.981549
P10768	S-formylglutathione hydrolase	57.466	52	11	63	11	ESD	4.82526e+07	4.85503e+07	0.993868
P10606	Cytochrome c oxidase subunit 5B, mitochondrial	4.736	15	2	8	2	COX5B	2.82609e+06	2.5698e+06	1.09973
P10599	Thioredoxin	60.89	66	7	69	7	TXN	1.34305e+08	1.33724e+08	1.00434
P10412	Histone H1.4	134.655	46	20	239	3	H1-4	8.24625e+07	8.09436e+07	1.01876
P10155	60 kDa SS-A/Ro ribonucleoprotein	42.039	19	9	44	9	RO60	5.26006e+06	5.23149e+06	1.00546
P0DP25	Calmodulin-3	38.982	38	6	25	6	CALM3	2.22232e+07	2.60134e+07	0.854298
P0DMV9	Heat shock 70 kDa protein 1B	215.997	59	34	460	18	HSPA1B	1.0775e+08	1.05803e+08	1.0184
P09972	Fructose-bisphosphate aldolase C	45.77	24	8	49	3	ALDOC	2.52245e+06	1.96572e+06	1.28322
P09960	Leukotriene A-4 hydrolase	106.279	44	21	104	21	LTA4H	8.47563e+06	7.90281e+06	1.07248
P09661	U2 small nuclear ribonucleoprotein A'	34.793	38	10	43	10	SNRPA1	3.77957e+06	3.9805e+06	0.949521
P09651	Heterogeneous nuclear ribonucleoprotein A1	121.004	52	23	174	20	HNRNPA1	5.39236e+07	5.68145e+07	0.949117
P09622	Dihydrolipoyl dehydrogenase, mitochondrial	41.55	21	9	63	9	DLD	1.65112e+07	1.63067e+07	1.01254
P09525	Annexin A4	46.964	43	13	44	13	ANXA4	7.25831e+06	8.88736e+06	0.816701
P09497	Clathrin light chain B	14.46	21	6	12	6	CLTB	1.23846e+07	1.43454e+07	0.863314
P09467	Fructose-1,6-bisphosphatase 1	145.733	64	22	240	21	FBP1	6.65881e+07	6.91359e+07	0.963149
P09429	High mobility group protein B1	130.487	53	18	232	13	HMGB1	6.42721e+07	5.87829e+07	1.09338
P09382	Galectin-1	25.362	39	5	29	5	LGALS1	4.63921e+06	5.21497e+06	0.889596
P09104	Gamma-enolase	33.705	18	5	43	2	ENO2	1.43471e+06	1.6533e+06	0.86779
P09012	U1 small nuclear ribonucleoprotein A	13.989	26	5	27	3	SNRPA	3.9324e+06	4.03968e+06	0.973443
P08865	40S ribosomal protein SA	70.973	57	14	97	14	RPSA	2.25825e+07	2.29667e+07	0.983272
P08758	Annexin A5	49.207	49	13	73	13	ANXA5	1.82873e+07	1.81627e+07	1.00686
P08754	Guanine nucleotide-binding protein G(i) subunit alpha-3	4.851	7	2	3	2	GNAI3	2.75811e+07	2.59525e+07	1.06275
P08708	40S ribosomal protein S17	80.472	64	11	104	11	RPS17	9.82709e+06	8.97841e+06	1.09452
P08621	U1 small nuclear ribonucleoprotein 70 kDa	86.096	40	20	186	20	SNRNP70	3.0959e+07	2.96692e+07	1.04347
P08579	U2 small nuclear ribonucleoprotein B''	20.544	20	4	27	2	SNRPB2	829902	561724	1.47742
P08574	Cytochrome c1, heme protein, mitochondrial	4.411	6	2	3	2	CYC1	636401	644930	0.986775
P08243	Asparagine synthetase [glutamine-hydrolyzing]	87.342	45	21	111	21	ASNS	2.18748e+07	2.0207e+07	1.08254
P08238	Heat shock protein HSP 90-beta	341.583	62	55	979	23	HSP90AB1	3.47407e+08	3.40729e+08	1.0196
P08237	ATP-dependent 6-phosphofructokinase, muscle type	31.392	15	10	41	8	PFKM	2.44147e+06	1.86227e+06	1.31101
P08195	4F2 cell-surface antigen heavy chain	81.21	34	18	118	18	SLC3A2	5.08401e+07	3.53706e+07	1.43736
P08133	Annexin A6	71.248	33	19	97	19	ANXA6	9.70917e+06	1.10489e+07	0.878744
P07910	Heterogeneous nuclear ribonucleoproteins C1/C2	47.497	26	11	91	11	HNRNPC	3.46711e+07	3.92383e+07	0.883603
P07900	Heat shock protein HSP 90-alpha	366.927	57	51	1027	31	HSP90AA1	1.75874e+08	1.69221e+08	1.03932
P07814	Bifunctional glutamate/proline--tRNA ligase	123.974	30	33	134	33	EPRS1	1.26705e+07	1.30148e+07	0.973543
P07741	Adenine phosphoribosyltransferase	52.028	76	11	105	11	APRT	1.46482e+08	1.46305e+08	1.00121
P07737	Profilin-1	100.423	86	14	259	14	PFN1	7.90709e+07	7.44526e+07	1.06203
P07686	Beta-hexosaminidase subunit beta	8.845	4	2	7	2	HEXB	3.46659e+06	3.79239e+06	0.914092
P07437	Tubulin beta chain	330.122	69	34	909	6	TUBB	5.1241e+07	4.72744e+07	1.08391
P07384	Calpain-1 catalytic subunit	67.281	28	19	121	19	CAPN1	2.64146e+07	2.73102e+07	0.967205
P07355	Annexin A2	82.247	59	17	91	17	ANXA2	5.23679e+07	5.29508e+07	0.988993
P07339	Cathepsin D	32.039	23	9	30	9	CTSD	2.67514e+07	2.44729e+07	1.0931
P07305	Histone H1.0	31.247	30	7	49	7	H1-0	1.43672e+07	1.88142e+07	0.763632
P07237	Protein disulfide-isomerase	218.062	71	37	324	37	P4HB	6.09009e+08	5.90961e+08	1.03054
P06899	Histone H2B type 1-J	178.163	75	20	450	6	H2BC11	5.97888e+07	5.88665e+07	1.01567
P06753	Tropomyosin alpha-3 chain	30.714	26	8	40	5	TPM3	1.0667e+07	9.68517e+06	1.10137
P06748	Nucleophosmin	177.063	55	21	271	21	NPM1	1.46911e+08	1.73584e+08	0.846342
P06744	Glucose-6-phosphate isomerase	115.462	55	23	236	23	GPI	1.11231e+08	1.09219e+08	1.01841
P06733	Alpha-enolase	250.215	87	38	420	35	ENO1	1.68084e+08	1.67049e+08	1.0062
P06730	Eukaryotic translation initiation factor 4E	11.929	11	4	20	4	EIF4E	2.34019e+06	2.22061e+06	1.05385
P06703	Protein S100-A6	9.956	29	2	23	2	S100A6	9.64697e+06	1.00045e+07	0.964259
P06702	Protein S100-A9	27.125	45	5	41	5	S100A9	2.26449e+07	2.20579e+07	1.02661
P06576	ATP synthase subunit beta, mitochondrial	70.337	35	15	73	15	ATP5F1B	4.45511e+07	4.34439e+07	1.02549
P06493	Cyclin-dependent kinase 1	40.622	42	10	52	8	CDK1	6.77447e+06	5.93275e+06	1.14188
P06454	Prothymosin alpha	44.252	41	8	38	8	PTMA	3.29957e+07	4.71889e+07	0.699226
P05455	Lupus La protein	45.251	28	11	54	11	SSB	7.58626e+06	7.93676e+06	0.955838
P05388	60S acidic ribosomal protein P0	83.231	56	14	154	5	RPLP0	4.19586e+07	5.23509e+07	0.801488
P05387	60S acidic ribosomal protein P2	103.872	83	12	114	12	RPLP2	1.15245e+08	1.15219e+08	1.00022
P05386	60S acidic ribosomal protein P1	36.524	75	3	24	3	RPLP1	1.82382e+07	1.8087e+07	1.00836
P05198	Eukaryotic translation initiation factor 2 subunit 1	40.622	37	11	48	11	EIF2S1	4.58211e+06	3.34434e+06	1.37011
P05165	Propionyl-CoA carboxylase alpha chain, mitochondrial	68.165	29	17	66	17	PCCA	8.74247e+06	7.24036e+06	1.20746
P05141	ADP/ATP translocase 2	60.693	37	14	164	6	SLC25A5	9.04314e+07	9.42474e+07	0.959511
P05109	Protein S100-A8	22.815	54	6	24	6	S100A8	1.57379e+07	1.84954e+07	0.850906
P05023	Sodium/potassium-transporting ATPase subunit alpha-1	10.301	5	4	11	4	ATP1A1	769865	985072	0.781532
P04843	Dolichyl-diphosphooligosaccharide--protein glycosyltransferase subunit 1	67.101	36	15	67	15	RPN1	1.45499e+07	1.3726e+07	1.06002
P04792	Heat shock protein beta-1	150.718	91	22	397	22	HSPB1	2.06317e+08	2.07182e+08	0.995828
P04632	Calpain small subunit 1	23.41	24	5	26	5	CAPNS1	3.79202e+06	3.69255e+06	1.02694
P04406	Glyceraldehyde-3-phosphate dehydrogenase	602.885	100	50	965	49	GAPDH	5.95044e+09	5.8136e+09	1.02354
P04350	Tubulin beta-4A chain	224.146	58	27	714	3	TUBB4A	5.781e+06	6.01876e+06	0.960497
P04183	Thymidine kinase, cytosolic	40.41	35	6	42	6	TK1	1.917e+06	2.1228e+06	0.903055
P04179	Superoxide dismutase [Mn], mitochondrial	41.133	41	7	34	7	SOD2	3.15174e+07	2.93633e+07	1.07336
P04150	Glucocorticoid receptor	21.039	10	6	8	6	NR3C1	2.96809e+06	2.92886e+06	1.01339
P04080	Cystatin-B	22.409	46	3	40	3	CSTB	1.43318e+07	1.19803e+07	1.19628
P04075	Fructose-bisphosphate aldolase A	266.082	95	38	478	33	ALDOA	2.47851e+08	2.30279e+08	1.07631
P02786	Transferrin receptor protein 1	58.493	24	15	54	15	TFRC	1.03339e+07	1.09014e+07	0.947945
P02768	Albumin	19.912	8	5	45	5	ALB	1.36207e+08	1.43832e+08	0.946984
P02545	Prelamin-A/C	103.061	45	27	160	26	LMNA	3.67171e+07	3.72259e+07	0.98633
P02144	Myoglobin	11.331	10	2	11	2	MB	1.14143e+06	1.231e+06	0.927235
P00966	Argininosuccinate synthase	16.648	17	6	22	6	ASS1	2.14355e+06	2.07849e+06	1.0313
P00558	Phosphoglycerate kinase 1	136.307	63	25	230	25	PGK1	6.21499e+07	5.52529e+07	1.12483
P00505	Aspartate aminotransferase, mitochondrial	43.823	34	12	72	12	GOT2	2.19177e+07	2.2429e+07	0.977204
P00492	Hypoxanthine-guanine phosphoribosyltransferase	41.084	48	9	44	9	HPRT1	1.00942e+07	1.27634e+07	0.79087
P00491	Purine nucleoside phosphorylase	40.268	36	7	28	7	PNP	7.78257e+06	9.5447e+06	0.815382
P00441	Superoxide dismutase [Cu-Zn]	11.339	17	2	10	2	SOD1	5.78892e+06	6.16128e+06	0.939563
P00403	Cytochrome c oxidase subunit 2	4.781	7	2	15	2	MT-CO2	2.0509e+06	2.33964e+06	0.876588
P00390	Glutathione reductase, mitochondrial	40.139	29	11	35	11	GSR	1.17694e+07	1.45211e+07	0.810502
P00367	Glutamate dehydrogenase 1, mitochondrial	12.787	11	5	10	5	GLUD1	1.40166e+06	1.55059e+06	0.903955
P00338	L-lactate dehydrogenase A chain	158.423	78	27	269	27	LDHA	9.26613e+07	8.92268e+07	1.03849
O96019	Actin-like protein 6A	10.406	14	4	9	4	ACTL6A	2.34609e+06	1.85127e+06	1.26729
O96013	Serine/threonine-protein kinase PAK 4	6.473	5	3	5	3	PAK4	331456	305317	1.08561
O96011	Peroxisomal membrane protein 11B	12.619	16	4	12	4	PEX11B	2.38251e+06	2.42663e+06	0.981819
O96008	Mitochondrial import receptor subunit TOM40 homolog	36.133	8	5	33	5	TOMM40	9.37824e+06	1.0058e+07	0.93242
O95994	Anterior gradient protein 2 homolog	35.112	37	6	23	6	AGR2	1.70243e+07	1.97634e+07	0.861404
O95881	Thioredoxin domain-containing protein 12	22.778	41	7	37	7	TXNDC12	4.42586e+07	4.89503e+07	0.904153
O95873	Uncharacterized protein C6orf47	3.976	8	2	3	2	C6orf47	538136	386709	1.39158
O95861	3'(2'),5'-bisphosphate nucleotidase 1	23.312	29	8	22	8	BPNT1	5.18895e+06	4.0558e+06	1.27939
O95758	Polypyrimidine tract-binding protein 3	11.605	8	4	20	2	PTBP3	974895	1.40263e+06	0.695047
O95747	Serine/threonine-protein kinase OSR1	6.467	5	3	13	3	OXSR1	1.40213e+06	1.55388e+06	0.902345
O95716	Ras-related protein Rab-3D	9.945	17	3	9	2	RAB3D	310547	284654	1.09096
O95671	Probable bifunctional dTTP/UTP pyrophosphatase/methyltransferase protein	78.236	43	18	37	18	ASMTL	4.8782e+06	4.42824e+06	1.10161
O95487	Protein transport protein Sec24B	7.158	2	2	11	2	SEC24B	801855	956836	0.838028
O95486	Protein transport protein Sec24A	21.877	8	6	16	6	SEC24A	3.44078e+06	2.78942e+06	1.23351
O95456	Proteasome assembly chaperone 1	32.803	25	6	23	6	PSMG1	2.31379e+06	2.91457e+06	0.79387
O95433	Activator of 90 kDa heat shock protein ATPase homolog 1	39.988	35	10	47	10	AHSA1	8.74922e+06	7.01641e+06	1.24697
O95373	Importin-7	117.267	26	21	99	20	IPO7	7.90785e+06	5.27634e+06	1.49874
O95361	Tripartite motif-containing protein 16	7.565	6	3	13	3	TRIM16	1.50698e+06	1.47023e+06	1.02499
O95347	Structural maintenance of chromosomes protein 2	45.234	17	16	32	16	SMC2	1.76918e+06	2.55476e+06	0.692503
O95336	6-phosphogluconolactonase	30.456	46	9	36	9	PGLS	2.42484e+07	2.19948e+07	1.10246
O95232	Luc7-like protein 3	42.169	20	9	65	9	LUC7L3	9.71226e+06	9.30997e+06	1.04321
O95218	Zinc finger Ran-binding domain-containing protein 2	41.014	28	10	35	10	ZRANB2	1.62991e+06	1.75615e+06	0.928117
O95197	Reticulon-3	27.521	8	6	52	6	RTN3	2.48556e+07	3.05061e+07	0.814773
O94992	Protein HEXIM1	10.521	11	3	6	3	HEXIM1	485196	464476	1.04461
O94952	F-box only protein 21	4.204	6	2	3	2	FBXO21	1.22337e+06	1.37236e+06	0.891439
O94906	Pre-mRNA-processing factor 6	20.082	9	8	17	8	PRPF6	1.51347e+06	1.80349e+06	0.839188
O94903	Pyridoxal phosphate homeostasis protein	5.604	8	2	2	2	PLPBP	1.81977e+06	2.15397e+06	0.844846
O94776	Metastasis-associated protein MTA2	24.406	13	8	31	7	MTA2	2.92972e+06	2.85404e+06	1.02652
O76094	Signal recognition particle subunit SRP72	31.645	17	9	22	9	SRP72	2.24942e+06	2.14884e+06	1.04681
O76071	Probable cytosolic iron-sulfur protein assembly protein CIAO1	15.878	20	4	8	4	CIAO1	1.52685e+06	1.59624e+06	0.956527
O76021	Ribosomal L1 domain-containing protein 1	46.811	23	11	60	11	RSL1D1	7.14106e+06	6.79207e+06	1.05138
O76003	Glutaredoxin-3	17.957	22	6	23	6	GLRX3	5.03198e+06	4.49269e+06	1.12004
O75964	ATP synthase subunit g, mitochondrial	13.419	34	3	16	3	ATP5MG	2.85332e+06	2.65561e+06	1.07445
O75937	DnaJ homolog subfamily C member 8	11.91	25	4	6	4	DNAJC8	8.55736e+06	7.80037e+06	1.09704
O75874	Isocitrate dehydrogenase [NADP] cytoplasmic	47.588	24	10	82	9	IDH1	9.65566e+06	1.04378e+07	0.925071
O75832	26S proteasome non-ATPase regulatory subunit 10	4.581	4	2	7	2	PSMD10	508341	516070	0.985023
O75821	Eukaryotic translation initiation factor 3 subunit G	21.254	19	5	27	5	EIF3G	2.29272e+07	2.99851e+07	0.764617
O75663	TIP41-like protein	14.863	15	4	8	4	TIPRL	310423	275731	1.12582
O75643	U5 small nuclear ribonucleoprotein 200 kDa helicase	173.169	28	48	201	48	SNRNP200	1.73509e+07	1.79776e+07	0.965136
O75608	Acyl-protein thioesterase 1	7.492	10	2	8	2	LYPLA1	5.3173e+06	4.95909e+06	1.07223
O75607	Nucleoplasmin-3	17.491	25	4	13	4	NPM3	2.40989e+06	2.77253e+06	0.869203
O75534	Cold shock domain-containing protein E1	59.707	24	19	85	19	CSDE1	1.08979e+07	1.05023e+07	1.03766
O75533	Splicing factor 3B subunit 1	84.387	21	21	65	21	SF3B1	8.3878e+06	8.59236e+06	0.976193
O75531	Barrier-to-autointegration factor	15.706	46	4	20	4	BANF1	8.82264e+06	7.6739e+06	1.14969
O75494	Serine/arginine-rich splicing factor 10	19.736	19	4	23	4	SRSF10	1.25878e+07	1.16479e+07	1.08069
O75439	Mitochondrial-processing peptidase subunit beta	17.489	12	5	9	5	PMPCB	4.20556e+06	3.55459e+06	1.18314
O75400	Pre-mRNA-processing factor 40 homolog A	22.263	7	7	32	7	PRPF40A	3.69383e+06	2.63069e+06	1.40413
O75396	Vesicle-trafficking protein SEC22b	14.811	25	4	10	4	SEC22B	4.67421e+06	4.22561e+06	1.10616
O75390	Citrate synthase, mitochondrial	33.05	17	8	75	8	CS	8.36334e+07	7.36004e+07	1.13632
O75369	Filamin-B	131.13	18	38	141	34	FLNB	8.50897e+06	9.39073e+06	0.906103
O75367	Core histone macro-H2A.1	82.697	52	15	138	13	MACROH2A1	3.42277e+07	3.17488e+07	1.07808
O75363	Breast carcinoma-amplified sequence 1	10.049	5	3	7	3	BCAS1	3.39046e+06	3.09438e+06	1.09568
O75362	Zinc finger protein 217	18.273	4	3	12	3	ZNF217	1.10629e+07	1.154e+07	0.958658
O75352	Mannose-P-dolichol utilization defect 1 protein	6.6	14	3	10	3	MPDU1	1.55335e+06	1.81044e+06	0.857992
O75351	Vacuolar protein sorting-associated protein 4B	25.461	24	7	19	7	VPS4B	9.66162e+06	8.12259e+06	1.18948
O75348	V-type proton ATPase subunit G 1	10.558	31	3	4	3	ATP6V1G1	6.46289e+06	6.90167e+06	0.936424
O75347	Tubulin-specific chaperone A	32.021	51	7	15	7	TBCA	1.61575e+07	1.77468e+07	0.910446
O75340	Programmed cell death protein 6	16.621	32	4	16	4	PDCD6	3.98916e+06	4.27674e+06	0.932757
O75223	Gamma-glutamylcyclotransferase	17.598	31	6	18	6	GGCT	8.25661e+06	9.17037e+06	0.900358
O75153	Clustered mitochondria protein homolog	93.46	21	24	125	24	CLUH	1.60424e+07	1.51356e+07	1.05991
O75150	E3 ubiquitin-protein ligase BRE1B	11.351	5	5	10	5	RNF40	3.1357e+06	3.42813e+06	0.914696
O75131	Copine-3	102.261	34	19	211	18	CPNE3	6.90022e+07	6.64764e+07	1.038
O75083	WD repeat-containing protein 1	61.845	30	15	73	15	WDR1	1.02987e+07	1.05632e+07	0.974959
O60888	Protein CutA	8.973	23	2	5	2	CUTA	2.09253e+06	1.66493e+06	1.25683
O60869	Endothelial differentiation-related factor 1	8.11	17	2	12	2	EDF1	2.00857e+06	1.98523e+06	1.01175
O60841	Eukaryotic translation initiation factor 5B	149.66	29	28	130	28	EIF5B	8.01867e+06	7.95886e+06	1.00752
O60783	28S ribosomal protein S14, mitochondrial	10.764	22	2	11	2	MRPS14	1.36847e+06	1.24731e+06	1.09714
O60701	UDP-glucose 6-dehydrogenase	85.26	53	21	94	21	UGDH	1.15692e+07	9.59967e+06	1.20517
O60664	Perilipin-3	24.503	21	6	17	6	PLIN3	2.9244e+06	3.33211e+06	0.877643
O60610	Protein diaphanous homolog 1	74.308	15	16	73	16	DIAPH1	1.13645e+07	1.11357e+07	1.02055
O60568	Multifunctional procollagen lysine hydroxylase and glycosyltransferase LH3	75.92	29	17	58	17	PLOD3	7.23205e+07	7.09863e+07	1.01879
O60506	Heterogeneous nuclear ribonucleoprotein Q	100.791	38	23	152	17	SYNCRIP	1.74721e+07	1.54909e+07	1.1279
O60493	Sorting nexin-3	3.706	10	2	5	2	SNX3	387452	372536	1.04004
O60341	Lysine-specific histone demethylase 1A	23.58	8	7	24	7	KDM1A	3.05856e+06	2.17604e+06	1.40556
O60264	SWI/SNF-related matrix-associated actin-dependent regulator of chromatin subfamily A member 5	24.541	8	8	18	5	SMARCA5	4.97747e+06	4.66081e+06	1.06794
O60216	Double-strand-break repair protein rad21 homolog	6.179	4	2	7	2	RAD21	6.34824e+06	7.30454e+06	0.869081
O43847	Nardilysin	29.231	10	10	30	10	NRDC	543165	414156	1.3115
O43776	Asparagine--tRNA ligase, cytoplasmic	57.626	30	17	92	17	NARS1	1.11183e+07	1.22415e+07	0.908246
O43768	Alpha-endosulfine	18.216	49	5	11	4	ENSA	7.37992e+06	6.78785e+06	1.08723
O43765	Small glutamine-rich tetratricopeptide repeat-containing protein alpha	13.942	7	2	9	2	SGTA	4.22012e+06	4.0479e+06	1.04255
O43760	Synaptogyrin-2	8.524	13	3	16	3	SYNGR2	2.90935e+06	4.25894e+06	0.683116
O43747	AP-1 complex subunit gamma-1	34.578	15	10	37	10	AP1G1	3.13421e+06	2.52626e+06	1.24065
O43708	Maleylacetoacetate isomerase	18.628	24	4	14	4	GSTZ1	5.22736e+06	4.83195e+06	1.08183
O43707	Alpha-actinin-4	166.418	52	38	205	24	ACTN4	4.23433e+07	4.06229e+07	1.04235
O43684	Mitotic checkpoint protein BUB3	22.101	32	8	25	8	BUB3	2.02438e+06	2.04825e+06	0.988349
O43681	ATPase GET3	30.161	33	8	54	8	GET3	4.6935e+06	4.21651e+06	1.11312
O43670	BUB3-interacting and GLEBS motif-containing protein ZNF207	5.326	5	2	5	2	ZNF207	1.35552e+06	1.16051e+06	1.16804
O43660	Pleiotropic regulator 1	5.754	3	2	10	2	PLRG1	1.3266e+06	1.06829e+06	1.24181
O43598	2'-deoxynucleoside 5'-phosphate N-hydrolase 1	19.906	39	4	17	4	DNPH1	2.37731e+06	1.74232e+06	1.36445
O43592	Exportin-T	40.197	14	11	42	11	XPOT	3.73252e+06	4.18314e+06	0.892278
O43583	Density-regulated protein	8.415	20	3	6	3	DENR	2.37179e+06	2.74149e+06	0.865145
O43572	A-kinase anchor protein 10, mitochondrial	11.966	8	4	5	4	AKAP10	1.55918e+06	1.51948e+06	1.02613
O43396	Thioredoxin-like protein 1	31.186	39	8	44	8	TXNL1	4.24451e+07	3.84796e+07	1.10306
O43395	U4/U6 small nuclear ribonucleoprotein Prp3	5.892	2	2	11	2	PRPF3	2.33631e+06	2.34442e+06	0.99654
O43390	Heterogeneous nuclear ribonucleoprotein R	70.168	31	18	113	12	HNRNPR	4.64792e+06	5.44898e+06	0.852989
O43324	Eukaryotic translation elongation factor 1 epsilon-1	26.944	57	7	25	7	EEF1E1	3.13503e+06	3.28775e+06	0.953549
O43242	26S proteasome non-ATPase regulatory subunit 3	63.25	31	17	73	17	PSMD3	9.73442e+06	8.65358e+06	1.1249
O43175	D-3-phosphoglycerate dehydrogenase	109.116	42	18	168	18	PHGDH	3.34715e+07	3.27903e+07	1.02077
O43172	U4/U6 small nuclear ribonucleoprotein Prp4	10.827	10	4	10	4	PRPF4	1.42759e+06	1.3112e+06	1.08877
O43169	Cytochrome b5 type B	34.873	69	7	54	7	CYB5B	1.08742e+07	1.13627e+07	0.95701
O43143	Pre-mRNA-splicing factor ATP-dependent RNA helicase DHX15	94.182	26	19	127	18	DHX15	1.831e+07	1.9201e+07	0.953597
O15372	Eukaryotic translation initiation factor 3 subunit H	8.964	13	3	8	3	EIF3H	972591	899081	1.08176
O15371	Eukaryotic translation initiation factor 3 subunit D	51.609	26	11	55	11	EIF3D	2.90072e+06	3.39195e+06	0.855177
O15357	Phosphatidylinositol 3,4,5-trisphosphate 5-phosphatase 2	11.76	4	4	5	4	INPPL1	424212	581335	0.72972
O15355	Protein phosphatase 1G	47.088	32	12	52	12	PPM1G	4.5531e+06	3.14163e+06	1.44928
O15347	High mobility group protein B3	18.767	33	5	23	5	HMGB3	6.88503e+06	8.1845e+06	0.841228
O15327	Inositol polyphosphate 4-phosphatase type II	18.429	8	6	7	6	INPP4B	395499	460794	0.858298
O15264	Mitogen-activated protein kinase 13	7.182	8	3	4	2	MAPK13	1.18801e+06	1.30556e+06	0.909964
O15260	Surfeit locus protein 4	24.291	23	5	24	5	SURF4	2.93413e+06	4.12358e+06	0.711549
O15258	Protein RER1	8.921	20	3	7	3	RER1	2.51346e+06	2.33252e+06	1.07757
O15144	Actin-related protein 2/3 complex subunit 2	46.953	37	12	56	12	ARPC2	1.37887e+07	1.31894e+07	1.04543
O15143	Actin-related protein 2/3 complex subunit 1B	38.705	37	10	38	9	ARPC1B	1.12843e+07	1.04861e+07	1.07612
O15067	Phosphoribosylformylglycinamidine synthase	75.241	21	21	54	21	PFAS	5.38756e+06	4.97974e+06	1.08189
O15042	U2 snRNP-associated SURP motif-containing protein	29.691	12	10	26	10	U2SURP	1.64801e+06	1.29924e+06	1.26845
O14980	Exportin-1	151.131	38	32	168	32	XPO1	4.89257e+07	4.88152e+07	1.00226
O14964	Hepatocyte growth factor-regulated tyrosine kinase substrate	10.543	3	2	7	2	HGS	1.43278e+06	1.10734e+06	1.29389
O14950	Myosin regulatory light chain 12B	10.83	19	3	17	3	MYL12B	1.4924e+06	1.80249e+06	0.827967
O14949	Cytochrome b-c1 complex subunit 8	33.324	40	5	51	5	UQCRQ	8.687e+06	8.06515e+06	1.0771
O14929	Histone acetyltransferase type B catalytic subunit	34.402	22	6	21	6	HAT1	1.01966e+06	1.35572e+06	0.752114
O14818	Proteasome subunit alpha type-7	45.388	50	11	55	11	PSMA7	5.20652e+06	4.42909e+06	1.17553
O14787	Transportin-2	25.117	10	7	33	6	TNPO2	3.25249e+06	2.97175e+06	1.09447
O14776	Transcription elongation regulator 1	24.16	11	10	18	10	TCERG1	6.495e+06	6.14937e+06	1.05621
O14745	Na(+)/H(+) exchange regulatory cofactor NHE-RF1	40.161	46	11	48	11	SLC9A3R1	1.92953e+07	1.79113e+07	1.07727
O14744	Protein arginine N-methyltransferase 5	29.175	21	9	37	9	PRMT5	2.30149e+07	2.42458e+07	0.949234
O14735	CDP-diacylglycerol--inositol 3-phosphatidyltransferase	16.277	21	3	16	3	CDIPT	2.80405e+07	2.83496e+07	0.989099
O14618	Copper chaperone for superoxide dismutase	7.841	11	3	4	3	CCS	193182	265590	0.72737
O00757	Fructose-1,6-bisphosphatase isozyme 2	12.242	11	3	31	2	FBP2	4.03334e+06	3.9905e+06	1.01074
O00743	Serine/threonine-protein phosphatase 6 catalytic subunit	7.183	11	3	9	3	PPP6C	283971	345860	0.821058
O00571	ATP-dependent RNA helicase DDX3X	80.856	37	21	95	20	DDX3X	1.01417e+07	1.41253e+07	0.717985
O00541	Pescadillo homolog	30.284	20	10	51	10	PES1	4.06291e+06	3.52207e+06	1.15356
O00487	26S proteasome non-ATPase regulatory subunit 14	11.829	10	3	40	3	PSMD14	4.82298e+06	3.95784e+06	1.21859
O00483	Cytochrome c oxidase subunit NDUFA4	10.184	53	3	10	3	NDUFA4	2.87369e+06	3.09964e+06	0.927106
O00429	Dynamin-1-like protein	42.531	14	9	45	9	DNM1L	3.96994e+06	4.00755e+06	0.990617
O00410	Importin-5	72.106	22	17	46	17	IPO5	7.12937e+06	8.46303e+06	0.842414
O00303	Eukaryotic translation initiation factor 3 subunit F	19.7	20	5	15	5	EIF3F	790112	594862	1.32823
O00299	Chloride intracellular channel protein 1	77.351	81	15	136	15	CLIC1	1.93557e+08	1.94162e+08	0.996881
O00267	Transcription elongation factor SPT5	23.718	7	6	27	6	SUPT5H	1.26377e+07	1.3595e+07	0.92958
O00244	Copper transport protein ATOX1	5.925	13	2	8	2	ATOX1	3.30918e+06	3.38972e+06	0.97624
O00232	26S proteasome non-ATPase regulatory subunit 12	19.613	15	7	31	7	PSMD12	3.15476e+06	2.32509e+06	1.35683
O00231	26S proteasome non-ATPase regulatory subunit 11	51.536	39	14	65	14	PSMD11	1.51358e+07	1.36585e+07	1.10816
O00203	AP-3 complex subunit beta-1	66.453	22	22	79	22	AP3B1	6.19287e+06	5.37525e+06	1.15211
O00170	AH receptor-interacting protein	20.792	21	6	36	6		3.22946e+06	2.5342e+06	1.27435
O00159	Unconventional myosin-Ic	29.494	10	11	28	11	MYO1C	4.97584e+06	7.00661e+06	0.710164
O00148	ATP-dependent RNA helicase DDX39A	62.461	33	16	108	4	DDX39A	3.61551e+07	3.37881e+07	1.07006
E9PRG8	Uncharacterized protein C11orf98	38.796	41	6	69	6	C11orf98	2.06023e+07	2.62737e+07	0.784142
A6NDG6	Glycerol-3-phosphate phosphatase	18.232	22	6	13	6	PGP	5.34695e+06	5.51177e+06	0.970098
A5YKK6	CCR4-NOT transcription complex subunit 1	18.424	3	5	10	5	CNOT1	2.34876e+06	2.299e+06	1.02164
A1L0T0	2-hydroxyacyl-CoA lyase 2	22.928	9	4	12	4	ILVBL	4.48418e+06	4.5975e+06	0.975353
A0MZ66	Shootin-1	9.432	5	3	6	3	SHTN1	960580	895583	1.07258
A0FGR8	Extended synaptotagmin-2	23.162	10	7	20	7	ESYT2	2.0791e+06	1.89642e+06	1.09633
A0AVT1	Ubiquitin-like modifier-activating enzyme 6	65.289	18	16	54	16	UBA6	8.51013e+06	9.5784e+06	0.888471
A0A0B4J2D5	Putative glutamine amidotransferase-like class 1 domain-containing protein 3B, mitochondrial	16.412	29	5	15	5	GATD3B	4.57587e+06	6.51462e+06	0.7024

## Sheet: TableSI-2 CP2
Modified cysteines containing proteome by CP2 in MCF-7 living cells
Accession	Description	Sum PEP Score	Coverage [%]	Peptides	PSMs	Unique Peptides	Gene	Abundances (Normalized) CP2-1	Abundances (Normalized) CP2-2	Two-repeat ratio
Q9Y6X8	Zinc fingers and homeoboxes protein 2	4.155	2	2	3	2	ZHX2	456338	458677	0.994899
Q9Y6U3	Adseverin	4.855	3	2	6	2	SCIN	2.4035e+06	1.64914e+06	1.45742
Q9Y6Q5	AP-1 complex subunit mu-2	20.755	18	7	14	5	AP1M2	1.81948e+06	2.21942e+06	0.819803
Q9Y6K5	2'-5'-oligoadenylate synthase 3	8.264	2	2	3	2	OAS3	757285	1.06386e+06	0.71183
Q9Y6J9	TAF6-like RNA polymerase II p300/CBP-associated factor-associated factor 65 kDa subunit 6L	15.158	15	5	8	5	TAF6L	3.95578e+06	4.73371e+06	0.835662
Q9Y6I9	Testis-expressed protein 264	9.672	17	3	8	3	TEX264	1.33939e+06	1.58247e+06	0.84639
Q9Y6I8	Peroxisomal membrane protein 4	14.925	16	4	21	4	PXMP4	3.68036e+06	3.79657e+06	0.969391
Q9Y6G9	Cytoplasmic dynein 1 light intermediate chain 1	13.041	11	4	11	4	DYNC1LI1	953910	1.25552e+06	0.75977
Q9Y6E2	Basic leucine zipper and W2 domain-containing protein 2	17.012	15	7	23	5	BZW2	2.00544e+06	2.0602e+06	0.973421
Q9Y6C9	Mitochondrial carrier homolog 2	68.484	47	10	65	10	MTCH2	4.03302e+07	3.16724e+07	1.27335
Q9Y696	Chloride intracellular channel protein 4	20.804	14	3	18	3	CLIC4	2.63032e+06	2.50329e+06	1.05075
Q9Y678	Coatomer subunit gamma-1	44.884	18	12	41	10	COPG1	1.06695e+07	1.22679e+07	0.869706
Q9Y617	Phosphoserine aminotransferase	6.004	6	2	9	2	PSAT1	1.65136e+06	1.71961e+06	0.960309
Q9Y606	tRNA pseudouridine synthase A	8.176	7	3	4	3	PUS1	523918	349718	1.49812
Q9Y5Y2	Cytosolic Fe-S cluster assembly factor NUBP2	9.975	11	3	23	3	NUBP2	5.59145e+06	7.08436e+06	0.789266
Q9Y5X3	Sorting nexin-5	4.078	4	2	3	2	SNX5	437102	527104	0.82925
Q9Y5Q9	General transcription factor 3C polypeptide 3	48.475	16	12	33	12	GTF3C3	1.23944e+07	1.42788e+07	0.868029
Q9Y5L0	Transportin-3	25.734	13	9	17	9	TNPO3	4.04779e+06	4.41926e+06	0.915943
Q9Y5K5	Ubiquitin carboxyl-terminal hydrolase isozyme L5	23.5	25	8	29	8	UCHL5	7528632	7.31892e+06	1.02865
Q9Y5B9	FACT complex subunit SPT16	32.983	13	10	26	10	SUPT16H	2.63729e+06	1.99511e+06	1.32187
Q9Y5B0	RNA polymerase II subunit A C-terminal domain phosphatase	7.003	2	2	6	2	CTDP1	1.55152e+06	1.91255e+06	0.811233
Q9Y5A7	NEDD8 ultimate buster 1	12.72	7	4	6	4	NUB1	886465	868194	1.02104
Q9Y575	Ankyrin repeat and SOCS box protein 3	5.712	5	2	2	2	ASB3	318545	360931	0.882566
Q9Y570	Protein phosphatase methylesterase 1	13.704	15	5	23	5	PPME1	4131492	5.87549e+06	0.703174
Q9Y4W2	Ribosomal biogenesis protein LAS1L	11.453	7	4	6	4	LAS1L	1.95156e+06	1.38834e+06	1.40568
Q9Y4R8	Telomere length regulation protein TEL2 homolog	12.738	6	3	10	3	TELO2	2.32877e+06	2.55258e+06	0.912318
Q9Y4P3	Transducin beta-like protein 2	11.312	12	4	6	4	TBL2	572926	643471	0.890368
Q9Y4P1	Cysteine protease ATG4B	25.583	20	5	9	5	ATG4B	2.79653e+06	3.00307e+06	0.931224
Q9Y4E8	Ubiquitin carboxyl-terminal hydrolase 15	10.848	2	3	6	3	USP15	1.21768e+06	1.76859e+06	0.688505
Q9Y4C2	TRPM8 channel-associated factor 1	4.831	2	2	2	2	TCAF1	3.2125e+06	2.15575e+06	1.4902
Q9Y490	Talin-1	33.615	5	8	32	8	TLN1	4.53806e+06	5.68673e+06	0.798008
Q9Y3U8	60S ribosomal protein L36	60.212	37	7	170	7	RPL36	1.04208e+08	7.28901e+07	1.42966
Q9Y3T9	Nucleolar complex protein 2 homolog	15.676	5	4	14	4	NOC2L	1.54339e+06	1.7165e+06	0.899151
Q9Y3F4	Serine-threonine kinase receptor-associated protein	9.419	11	3	10	3	STRAP	842630	833367	1.01112
Q9Y3E5	Peptidyl-tRNA hydrolase 2, mitochondrial	8.387	27	3	3	3	PTRH2	746256	795784	0.937761
Q9Y3E0	Vesicle transport protein GOT1B	8.612	11	2	10	2	GOLT1B	1.84038e+06	1.87954e+06	0.979163
Q9Y3D6	Mitochondrial fission 1 protein	16.095	36	5	14	5	FIS1	2.77e+06	2.84771e+06	0.97271
Q9Y3C1	Nucleolar protein 16	10.404	21	4	9	4	NOP16	1.23684e+06	1.29721e+06	0.953457
Q9Y3C0	WASH complex subunit 3	12.735	16	2	7	2	WASHC3	2.14416e+06	2.14199e+06	1.00101
Q9Y3B4	Splicing factor 3B subunit 6	9.609	27	3	10	3	SF3B6	1.25323e+06	1.13724e+06	1.10199
Q9Y3A5	Ribosome maturation protein SBDS	10.337	18	4	13	4	SBDS	4.03164e+06	3.82737e+06	1.05337
Q9Y3A3	MOB-like protein phocein	5.669	11	2	6	2	MOB4	652063	442414	1.47388
Q9Y388	RNA-binding motif protein, X-linked 2	4.491	7	2	4	2	RBMX2	494330	499520	0.989609
Q9Y383	Putative RNA-binding protein Luc7-like 2	41.98	24	9	93	6	LUC7L2	2.88462e+07	2.29436e+07	1.25727
Q9Y365	START domain-containing protein 10	44.869	42	9	90	9	STARD10	2.02491e+07	2.91335e+07	0.695045
Q9Y333	U6 snRNA-associated Sm-like protein LSm2	13.672	60	4	11	4	LSM2	2.13052e+06	2.77152e+06	0.768719
Q9Y316	Protein MEMO1	11.269	10	2	6	2	MEMO1	1.27323e+06	1.64191e+06	0.775459
Q9Y2X3	Nucleolar protein 58	18.63	15	6	17	6	NOP58	2.34082e+06	1.74836e+06	1.33887
Q9Y2T2	AP-3 complex subunit mu-1	10.473	10	3	10	3	AP3M1	774509	806700	0.960097
Q9Y2B0	Protein canopy homolog 2	19.095	38	5	9	5	CNPY2	1.36312e+06	1.03688e+06	1.31464
Q9Y2A7	Nck-associated protein 1	8.917	4	3	6	3	NCKAP1	629215	612338	1.02756
Q9Y295	Developmentally-regulated GTP-binding protein 1	25.528	19	5	23	5	DRG1	3.80677e+06	4.86427e+06	0.782598
Q9Y277	Voltage-dependent anion-selective channel protein 3	31.093	25	6	22	5	VDAC3	1.06119e+07	9.28938e+06	1.14237
Q9Y266	Nuclear migration protein nudC	15.382	18	5	12	5	NUDC	4.09679e+06	3.97991e+06	1.02937
Q9Y265	RuvB-like 1	61.197	36	12	84	12	RUVBL1	2.2685e+07	2.56262e+07	0.885226
Q9Y262	Eukaryotic translation initiation factor 3 subunit L	100.215	35	20	117	20	EIF3L	3.70279e+07	3.78877e+07	0.977305
Q9Y230	RuvB-like 2	35.819	28	12	44	12	RUVBL2	7.80032e+06	7.3934e+06	1.05504
Q9Y224	RNA transcription, translation and transport factor protein	20.518	34	5	12	5	RTRAF	1.95733e+06	1.59974e+06	1.22353
Q9UQ80	Proliferation-associated protein 2G4	53.891	38	13	99	13	PA2G4	2.93771e+07	3.51443e+07	0.835899
Q9UQ35	Serine/arginine repetitive matrix protein 2	240.817	23	49	352	49	SRRM2	1.22885e+08	1.10841e+08	1.10866
Q9UQ13	Leucine-rich repeat protein SHOC-2	9.821	6	3	5	3	SHOC2	693231	818986	0.84645
Q9UPN9	E3 ubiquitin-protein ligase TRIM33	37.148	11	11	32	11	TRIM33	1.90992e+07	1.85486e+07	1.02969
Q9UPN6	SR-related and CTD-associated factor 8	9.169	3	3	7	3	SCAF8	302135	255406	1.18296
Q9UPM8	AP-4 complex subunit epsilon-1	77.697	23	20	45	20	AP4E1	2.12962e+07	2.69498e+07	0.790216
Q9UP83	Conserved oligomeric Golgi complex subunit 5	9.309	4	3	10	3	COG5	536282	715763	0.749246
Q9UNS2	COP9 signalosome complex subunit 3	11.011	9	3	9	3	COPS3	1.5791e+06	1.83704e+06	0.85959
Q9UNQ2	Probable dimethyladenosine transferase	7.706	10	3	4	3	DIMT1	1950179	2.30315e+06	0.846743
Q9UNM6	26S proteasome non-ATPase regulatory subunit 13	36.27	31	11	41	11	PSMD13	1.00382e+07	9.94338e+06	1.00954
Q9UNH7	Sorting nexin-6	11.129	12	4	9	4	SNX6	315603	213084	1.48112
Q9UNE7	E3 ubiquitin-protein ligase CHIP	6.43	8	2	9	2	STUB1	1.24513e+06	1.637e+06	0.760618
Q9UN86	Ras GTPase-activating protein-binding protein 2	19.831	16	6	15	5	G3BP2	3.99053e+06	2.92596e+06	1.36384
Q9UN81	LINE-1 retrotransposable element ORF1 protein	8.566	9	2	7	2	L1RE1	1.69552e+06	1.86715e+06	0.908077
Q9UMS4	Pre-mRNA-processing factor 19	27.079	20	7	40	7	PRPF19	8.80062e+06	8.18828e+06	1.07478
Q9ULZ3	Apoptosis-associated speck-like protein containing a CARD	15.039	26	4	9	4	PYCARD	2518316	2.22939e+06	1.1296
Q9ULV4	Coronin-1C	22.973	19	7	20	7	CORO1C	3.18206e+06	3.6186e+06	0.879362
Q9ULJ7	Ankyrin repeat domain-containing protein 50	13.339	4	5	6	5	ANKRD50	1.59219e+06	1.44001e+06	1.10567
Q9ULD0	2-oxoglutarate dehydrogenase-like, mitochondrial	5.093	2	2	7	2	OGDHL	301011	228712	1.31611
Q9ULC4	Malignant T-cell-amplified sequence 1	24.919	51	7	20	7	MCTS1	4.91209e+06	6.12892e+06	0.801462
Q9ULA0	Aspartyl aminopeptidase	74.149	29	10	113	10	DNPEP	3.49359e+07	4.07931e+07	0.856417
Q9UL46	Proteasome activator complex subunit 2	83.485	58	12	115	12	PSME2	5.0146e+07	5.74676e+07	0.872595
Q9UL25	Ras-related protein Rab-21	32.233	34	6	42	6	RAB21	14798546	1.59833e+07	0.925876
Q9UKV8	Protein argonaute-2	10.588	5	3	5	3	AGO2	660740	964174	0.685291
Q9UKV3	Apoptotic chromatin condensation inducer in the nucleus	18.506	5	5	26	5	ACIN1	3.87982e+06	3.48261e+06	1.11406
Q9UKS6	Protein kinase C and casein kinase substrate in neurons protein 3	5.255	5	2	6	2	PACSIN3	624943	544328	1.1481
Q9UKR5	Ergosterol biosynthetic protein 28 homolog	8.217	21	3	10	3	ERG28	1.76566e+07	1.82011e+07	0.970081
Q9UKM9	RNA-binding protein Raly	17.003	19	6	24	6	RALY	3.67141e+06	4.29475e+06	0.85486
Q9UKL0	REST corepressor 1	12.169	10	4	10	4	RCOR1	1.1319e+06	1.0015e+06	1.1302
Q9UKK9	ADP-sugar pyrophosphatase	6.701	10	2	11	2	NUDT5	2.24885e+06	1.9549e+06	1.15037
Q9UKD2	mRNA turnover protein 4 homolog	13.189	21	4	7	4	MRTO4	514316	472520	1.08845
Q9UJU6	Drebrin-like protein	8.712	10	3	7	3	DBNL	2.74959e+06	2.59134e+06	1.06107
Q9UJA5	tRNA (adenine(58)-N(1))-methyltransferase non-catalytic subunit TRM6	7.118	9	3	3	3	TRMT6	477591	384537	1.24199
Q9UJ70	N-acetyl-D-glucosamine kinase	12.089	15	4	15	4	NAGK	2.15561e+06	2.86467e+06	0.752479
Q9UIC8	Leucine carboxyl methyltransferase 1	11.033	9	2	15	2	LCMT1	2.33649e+06	2.93826e+06	0.795195
Q9UIA9	Exportin-7	30.907	11	10	22	10	XPO7	4.4344e+06	3.69145e+06	1.20126
Q9UI30	Multifunctional methyltransferase subunit TRM112-like protein	13.758	31	3	13	3	TRMT112	1.92329e+06	2.40838e+06	0.798582
Q9UI10	Translation initiation factor eIF-2B subunit delta	21.919	17	6	13	6	EIF2B4	597592	847290	0.705298
Q9UHX1	Poly(U)-binding-splicing factor PUF60	18.68	12	6	11	6	PUF60	2.02212e+06	2.00439e+06	1.00884
Q9UHV9	Prefoldin subunit 2	12.487	23	3	15	3	PFDN2	1.64475e+06	1.77508e+06	0.926578
Q9UHQ1	Nuclear prelamin A recognition factor	20.142	16	6	11	6	NARF	1.30266e+06	1.76219e+06	0.739232
Q9UHI6	Probable ATP-dependent RNA helicase DDX20	8.099	6	3	4	3	DDX20	1.19511e+06	1.01026e+06	1.18297
Q9UHG3	Prenylcysteine oxidase 1	44.176	26	11	30	11	PCYOX1	1.29931e+07	1.20056e+07	1.08225
Q9UHD8	Septin-9	43.309	24	12	56	12	SEPTIN9	1.09214e+07	1.18404e+07	0.922383
Q9UHB9	Signal recognition particle subunit SRP68	25.004	10	7	14	7	SRP68	3.07103e+06	2.59754e+06	1.18228
Q9UHB6	LIM domain and actin-binding protein 1	5.91	4	2	4	2	LIMA1	1.5296e+06	1.2034e+06	1.27107
Q9UGP8	Translocation protein SEC63 homolog	8.111	4	3	4	3	SEC63	399131	391930	1.01837
Q9UG63	ATP-binding cassette sub-family F member 2	31.104	17	9	26	9	ABCF2	3.86803e+06	3.52124e+06	1.09849
Q9UBW8	COP9 signalosome complex subunit 7a	5.026	7	2	3	2	COPS7A	673466	726694	0.926754
Q9UBV8	Peflin	14.307	23	4	14	4	PEF1	6.40645e+06	4.55476e+06	1.40654
Q9UBT2	SUMO-activating enzyme subunit 2	10.183	6	4	7	4	UBA2	8.64517e+06	1.09472e+07	0.789714
Q9UBS8	E3 ubiquitin-protein ligase RNF14	38.563	22	10	36	10	RNF14	1.5678e+07	1.67604e+07	0.935423
Q9UBQ0	Vacuolar protein sorting-associated protein 29	12.227	25	4	16	4	VPS29	2.01395e+06	2.18879e+06	0.92012
Q9UBM7	7-dehydrocholesterol reductase	25.275	17	7	47	7	DHCR7	8.56335e+06	7.26694e+06	1.1784
Q9UBF8	Phosphatidylinositol 4-kinase beta	8.643	4	3	8	3	PI4KB	1.17595e+06	1.19004e+06	0.988159
Q9UBF2	Coatomer subunit gamma-2	21.208	9	6	18	4	COPG2	1.59076e+06	1.67279e+06	0.950962
Q9UBB6	Neurochondrin	22.483	10	5	8	5	NCDN	2.05279e+06	2.90115e+06	0.707578
Q9UBB4	Ataxin-10	17.831	16	6	13	6	ATXN10	2.44135e+06	2.7301e+06	0.894235
Q9P2X3	Protein IMPACT	20.487	24	6	11	6	IMPACT	2.47568e+06	2.64391e+06	0.936369
Q9P2J5	Leucine--tRNA ligase, cytoplasmic	97.157	28	26	125	26	LARS1	2.55904e+07	2.73888e+07	0.934337
Q9P2I0	Cleavage and polyadenylation specificity factor subunit 2	4.624	3	2	3	2	CPSF2	2.64965e+06	2.69951e+06	0.981531
Q9P289	Serine/threonine-protein kinase 26	11.227	12	4	4	4	STK26	585380	641940	0.911892
Q9P287	BRCA2 and CDKN1A-interacting protein	9.66	10	2	9	2	BCCIP	2.37061e+06	1.76535e+06	1.34285
Q9P258	Protein RCC2	85.322	37	21	120	21	RCC2	2.87651e+07	3.45224e+07	0.833228
Q9P253	Vacuolar protein sorting-associated protein 18 homolog	51.83	15	11	46	11	VPS18	9.46013e+06	1.00736e+07	0.939097
Q9P0M6	Core histone macro-H2A.2	26.087	18	4	52	2	MACROH2A2	785447	647568	1.21292
Q9P0L0	Vesicle-associated membrane protein-associated protein A	20.419	17	3	25	3	VAPA	7.03237e+06	5.84776e+06	1.20258
Q9P035	Very-long-chain (3R)-3-hydroxyacyl-CoA dehydratase 3	29.29	26	7	38	7	HACD3	1.18013e+07	1.07739e+07	1.09536
Q9NZT2	Opioid growth factor receptor	29.231	17	10	23	10	OGFR	6379459	6.84678e+06	0.931746
Q9NZN3	EH domain-containing protein 3	15.897	9	5	21	4	EHD3	3.04173e+06	3.26482e+06	0.931667
Q9NZL4	Hsp70-binding protein 1	27.241	26	7	20	7	HSPBP1	4.77261e+06	5.09491e+06	0.936742
Q9NZJ7	Mitochondrial carrier homolog 1	4.897	5	2	3	2	MTCH1	1.18406e+06	893932	1.32455
Q9NZD2	Glycolipid transfer protein	6.263	11	2	10	2	GLTP	2.04722e+06	2.6401e+06	0.775431
Q9NZB2	Constitutive coactivator of PPAR-gamma-like protein 1	111.5	33	27	78	27	FAM120A	2.77987e+07	2.54287e+07	1.0932
Q9NZ01	Very-long-chain enoyl-CoA reductase	17.629	13	4	31	4	TECR	12631630	1.23572e+07	1.02221
Q9NYL9	Tropomodulin-3	20.599	24	6	33	6	TMOD3	5.34745e+06	5.07539e+06	1.0536
Q9NYF8	Bcl-2-associated transcription factor 1	18.387	6	5	27	5	BCLAF1	4.02601e+06	3.70542e+06	1.08652
Q9NY33	Dipeptidyl peptidase 3	44.289	23	11	39	11	DPP3	4.64462e+06	5.46823e+06	0.849383
Q9NXW9	Alpha-ketoglutarate-dependent dioxygenase alkB homolog 4	17.631	21	6	16	6	ALKBH4	7.74999e+06	8.84971e+06	0.875734
Q9NXR7	BRISC and BRCA1-A complex member 2	10.416	10	3	6	3	BABAM2	2.17419e+06	2.45046e+06	0.887255
Q9NXH9	tRNA (guanine(26)-N(2))-dimethyltransferase	6.586	5	3	5	3	TRMT1	1.74869e+06	2.02788e+06	0.862321
Q9NXG2	THUMP domain-containing protein 1	27.178	20	8	24	8	THUMPD1	4.67506e+06	3.99003e+06	1.17168
Q9NXF1	Testis-expressed protein 10	8.639	3	2	4	2	TEX10	1.19062e+06	1.32953e+06	0.895515
Q9NX63	MICOS complex subunit MIC19	7.7	9	3	5	3	CHCHD3	875887	821698	1.06595
Q9NX61	Transmembrane protein 161A	7.45	5	2	4	2	TMEM161A	919573	622490	1.47725
Q9NWV8	BRISC and BRCA1-A complex member 1	12.222	17	3	5	3	BABAM1	2.06879e+06	1.93768e+06	1.06766
Q9NW13	RNA-binding protein 28	4.672	3	2	3	2	RBM28	565224	508509	1.11153
Q9NVP2	Histone chaperone ASF1B	10.503	21	3	5	3	ASF1B	548628	823809	0.665965
Q9NVP1	ATP-dependent RNA helicase DDX18	50.133	16	9	80	9	DDX18	1.14543e+07	1.20734e+07	0.948721
Q9NVI1	Fanconi anemia group I protein	13.59	4	4	10	4	FANCI	2.25748e+06	3.3828e+06	0.667342
Q9NVA2	Septin-11	7.472	8	3	9	2	SEPTIN11	1.49244e+06	1.15581e+06	1.29124
Q9NUQ8	ATP-binding cassette sub-family F member 3	13.163	9	5	8	5	ABCF3	1.11863e+06	1.65667e+06	0.675227
Q9NTK5	Obg-like ATPase 1	61.022	41	13	72	13	OLA1	2.41306e+07	2.70007e+07	0.893702
Q9NTJ3	Structural maintenance of chromosomes protein 4	14.38	4	5	14	5	SMC4	2.38376e+06	2.2377e+06	1.06527
Q9NSD9	Phenylalanine--tRNA ligase beta subunit	42.412	24	14	54	14	FARSB	1.41208e+07	1.51708e+07	0.930789
Q9NRX2	39S ribosomal protein L17, mitochondrial	12.769	14	2	6	2	MRPL17	996448	1.14923e+06	0.867054
Q9NRX1	RNA-binding protein PNO1	4.556	10	2	3	2	PNO1	990939	1.36068e+06	0.728268
Q9NRN7	L-aminoadipate-semialdehyde dehydrogenase-phosphopantetheinyl transferase	13.833	14	4	12	4	AASDHPPT	6.33511e+06	6.12605e+06	1.03413
Q9NRF9	DNA polymerase epsilon subunit 3	4.275	16	2	2	2	POLE3	243656	236327	1.03101
Q9NR56	Muscleblind-like protein 1	9.972	13	4	10	4	MBNL1	2.19271e+06	3.10805e+06	0.705496
Q9NR50	Translation initiation factor eIF-2B subunit gamma	11.896	14	5	7	5	EIF2B3	663959	838877	0.791485
Q9NR45	Sialic acid synthase	31.329	33	7	34	7	NANS	9.32357e+06	1.385e+07	0.673184
Q9NR30	Nucleolar RNA helicase 2	76.435	34	20	109	18	DDX21	2.17665e+07	2.58629e+07	0.84161
Q9NQT5	Exosome complex component RRP40	14.716	11	3	9	3	EXOSC3	1.51487e+06	1.85125e+06	0.818298
Q9NQT4	Exosome complex component RRP46	8.459	8	2	9	2	EXOSC5	2.10911e+06	2.25814e+06	0.934003
Q9NQR4	Omega-amidase NIT2	180.636	86	22	193	22	NIT2	2.90788e+08	3.65159e+08	0.796332
Q9NQP4	Prefoldin subunit 4	4.837	17	2	2	2	PFDN4	921144	1.0123e+06	0.909951
Q9NQG5	Regulation of nuclear pre-mRNA domain-containing protein 1B	10.167	12	3	9	3	RPRD1B	1.03519e+06	1.10384e+06	0.93781
Q9NQC3	Reticulon-4	27.217	5	5	41	5	RTN4	1.03394e+07	8.92561e+06	1.1584
Q9NQ88	Fructose-2,6-bisphosphatase TIGAR	10.909	13	3	12	3	TIGAR	3.91454e+06	4.56378e+06	0.85774
Q9NNW7	Thioredoxin reductase 2, mitochondrial	11.278	9	3	12	2	TXNRD2	1.49248e+06	1.28789e+06	1.15885
Q9HDC9	Adipocyte plasma membrane-associated protein	25.467	22	9	36	9	APMAP	725105	1.08741e+06	0.666819
Q9HCE1	Helicase MOV-10	12.701	6	5	10	5	MOV10	1.2078e+06	1.30848e+06	0.923053
Q9HCC0	Methylcrotonoyl-CoA carboxylase beta chain, mitochondrial	55.02	33	14	55	14	MCCC2	3746698	4.27287e+06	0.876857
Q9HC38	Glyoxalase domain-containing protein 4	30.835	37	9	49	9	GLOD4	6.6847e+06	6.0016e+06	1.11382
Q9HB71	Calcyclin-binding protein	57.312	60	12	62	12	CACYBP	4.67464e+06	4.06828e+06	1.14905
Q9HB07	MYG1 exonuclease	10.231	12	4	12	4	MYG1	2.34441e+06	2.40413e+06	0.975158
Q9HAV4	Exportin-5	143.161	32	31	133	31	XPO5	6.9557e+07	9.05472e+07	0.768185
Q9HA64	Ketosamine-3-kinase	7.547	8	2	5	2	FN3KRP	935493	1.27878e+06	0.731552
Q9H9B4	Sideroflexin-1	18.064	19	6	12	6	SFXN1	3.10531e+06	3.31233e+06	0.937502
Q9H993	Damage-control phosphatase ARMT1	62.288	44	12	56	12	ARMT1	1.4438e+07	1.79915e+07	0.802491
Q9H8W4	Pleckstrin homology domain-containing family F member 2	3.74	9	2	5	2	PLEKHF2	586017	434411	1.34899
Q9H8P0	Polyprenol reductase	7.125	10	3	5	3	SRD5A3	1.53006e+06	1.17196e+06	1.30556
Q9H8H3	Methyltransferase-like protein 7A	7.172	12	2	6	2	METTL7A	1.74067e+06	1.23825e+06	1.40576
Q9H845	Complex I assembly factor ACAD9, mitochondrial	52.888	24	11	26	11	ACAD9	1.33079e+07	1.30046e+07	1.02332
Q9H832	Ubiquitin-conjugating enzyme E2 Z	8.517	8	3	10	3	UBE2Z	945952	1.07065e+06	0.883529
Q9H814	Phosphorylated adapter RNA export protein	6.809	5	2	7	2	PHAX	1.59244e+06	1.73786e+06	0.916323
Q9H7Z7	Prostaglandin E synthase 2	29.384	30	9	19	9	PTGES2	2.30335e+06	1.64803e+06	1.39763
Q9H7N4	Splicing factor, arginine/serine-rich 19	15.711	5	5	14	5	SCAF1	2.81455e+06	2.58244e+06	1.08988
Q9H7B2	Ribosome production factor 2 homolog	6.49	9	3	9	3	RPF2	2.03058e+06	2.61636e+06	0.776108
Q9H773	dCTP pyrophosphatase 1	15.393	29	5	21	5	DCTPP1	2.20643e+06	1.88758e+06	1.16892
Q9H6T0	Epithelial splicing regulatory protein 2	42.352	18	10	26	9	ESRP2	1.41755e+07	1.90612e+07	0.743685
Q9H6F5	Coiled-coil domain-containing protein 86	7.719	5	3	4	3	CCDC86	307939	288887	1.06595
Q9H5X1	Cytosolic iron-sulfur assembly component 2A	4.724	13	2	3	2	CIAO2A	470696	488172	0.964202
Q9H4A5	Golgi phosphoprotein 3-like	8.766	9	3	3	2	GOLPH3L	1.21173e+06	1.15467e+06	1.04942
Q9H4A4	Aminopeptidase B	99.203	40	20	122	20	RNPEP	3.25988e+07	3.4345e+07	0.949156
Q9H444	Charged multivesicular body protein 4b	15.6	22	4	8	4	CHMP4B	395097	370772	1.06561
Q9H3U1	Protein unc-45 homolog A	50.876	17	13	34	13	UNC45A	4.26349e+06	3.98982e+06	1.06859
Q9H3N1	Thioredoxin-related transmembrane protein 1	23.055	23	6	34	6	TMX1	6.45708e+06	5.62919e+06	1.14707
Q9H3K6	BolA-like protein 2	14.542	50	4	30	4	BOLA2; BOLA2B	6.86543e+06	6.45881e+06	1.06296
Q9H307	Pinin	28.064	12	9	44	9	PNN	8.06653e+06	6.90909e+06	1.16752
Q9H2U1	ATP-dependent DNA/RNA helicase DHX36	9.428	4	4	8	4	DHX36	4.80237e+06	4.06877e+06	1.1803
Q9H1E3	Nuclear ubiquitous casein and cyclin-dependent kinase substrate 1	34.423	24	6	28	6	NUCKS1	3.79718e+06	2.64277e+06	1.43682
Q9H0W8	Protein SMG9	27.509	18	7	18	7	SMG9	5.61408e+06	8.0711e+06	0.695578
Q9H0U4	Ras-related protein Rab-1B	35.03	43	7	35	2	RAB1B	15190634	1.68685e+07	0.900532
Q9H0D6	5'-3' exoribonuclease 2	23.662	10	8	17	8	XRN2	3.87327e+06	3.86212e+06	1.00289
Q9H0A0	RNA cytidine acetyltransferase	14.713	6	6	13	6	NAT10	2.18978e+06	2.148e+06	1.01945
Q9H074	Polyadenylate-binding protein-interacting protein 1	17.327	11	5	12	5	PAIP1	1.68333e+06	2.28016e+06	0.73825
Q9GZT3	SRA stem-loop-interacting RNA-binding protein, mitochondrial	8.864	31	3	10	3	SLIRP	1.75528e+06	1.59949e+06	1.0974
Q9GZR7	ATP-dependent RNA helicase DDX24	11.498	5	4	5	4	DDX24	2.25415e+06	2.38937e+06	0.943407
Q9GZN8	UPF0687 protein C20orf27	7.424	23	3	7	3	C20orf27	471240	554015	0.85059
Q9BZZ5	Apoptosis inhibitor 5	42.814	24	10	28	10	API5	1.58631e+07	1.53013e+07	1.03671
Q9BZE9	Tether containing UBX domain for GLUT4	5.716	5	3	3	3	ASPSCR1	772314	716547	1.07783
Q9BZE4	GTP-binding protein 4	23.846	15	9	29	9	GTPBP4	6.44395e+06	4.68152e+06	1.37646
Q9BYJ9	YTH domain-containing family protein 1	5.25	4	2	3	2	YTHDF1	859172	678572	1.26615
Q9BYB4	Guanine nucleotide-binding protein subunit beta-like protein 1	3.867	6	2	2	2	GNB1L	896745	607439	1.47627
Q9BY44	Eukaryotic translation initiation factor 2A	31.146	22	10	31	10	EIF2A	6.84421e+06	5.95967e+06	1.14842
Q9BY32	Inosine triphosphate pyrophosphatase	6.4	12	2	4	2	ITPA	1.24611e+06	1.46835e+06	0.848648
Q9BXW9	Fanconi anemia group D2 protein	33.343	7	9	24	9	FANCD2	1.26179e+07	1.67076e+07	0.755222
Q9BXS5	AP-1 complex subunit mu-1	13.193	13	5	12	3	AP1M1	568180	696009	0.81634
Q9BXP5	Serrate RNA effector molecule homolog	24.802	11	8	20	8	SRRT	7.42842e+06	7.62287e+06	0.974491
Q9BXJ9	N-alpha-acetyltransferase 15, NatA auxiliary subunit	44.602	19	15	36	15	NAA15	9.58068e+06	8.58877e+06	1.11549
Q9BX63	Fanconi anemia group J protein	19.178	8	7	11	7	BRIP1	3.20559e+06	3.7696e+06	0.850378
Q9BWF3	RNA-binding protein 4	50.025	38	9	46	9	RBM4	1.29453e+07	1.23262e+07	1.05022
Q9BWD1	Acetyl-CoA acetyltransferase, cytosolic	11.461	10	2	9	2	ACAT2	464691	558176	0.832517
Q9BW27	Nuclear pore complex protein Nup85	7.365	4	2	4	2	NUP85	250715	260629	0.961963
Q9BVP2	Guanine nucleotide-binding protein-like 3	4.101	4	2	2	2	GNL3	506333	480371	1.05405
Q9BVK6	Transmembrane emp24 domain-containing protein 9	6.579	8	2	5	2	TMED9	536725	647453	0.82898
Q9BVJ7	Dual specificity protein phosphatase 23	13.301	36	5	13	5	DUSP23	8.79935e+06	6.34036e+06	1.38783
Q9BVC6	Transmembrane protein 109	7.235	9	2	7	2	TMEM109	1.46572e+06	2.15431e+06	0.680365
Q9BV44	THUMP domain-containing protein 3	11.301	8	4	10	4	THUMPD3	1.25215e+06	1.42542e+06	0.878441
Q9BV40	Vesicle-associated membrane protein 8	4.859	24	2	3	2	VAMP8	1018104	680721	1.49563
Q9BV38	WD repeat-containing protein 18	8.533	7	3	5	3	WDR18	396652	495277	0.80087
Q9BUQ8	Probable ATP-dependent RNA helicase DDX23	49.501	17	14	72	14	DDX23	3.18787e+07	3.00601e+07	1.0605
Q9BUN8	Derlin-1	17.094	20	5	23	5	DERL1	2.3168e+07	2.05968e+07	1.12483
Q9BUL8	Programmed cell death protein 10	12.16	16	4	21	4	PDCD10	1.33962e+06	1.65677e+06	0.808575
Q9BUK6	Protein misato homolog 1	11.005	7	4	9	4	MSTO1	1.40316e+06	1.36111e+06	1.0309
Q9BUJ2	Heterogeneous nuclear ribonucleoprotein U-like protein 1	24.261	11	7	15	7	HNRNPUL1	2.6267e+06	2.65119e+06	0.990764
Q9BUF5	Tubulin beta-6 chain	79.854	26	13	298	2	TUBB6	1.13585e+07	1.52292e+07	0.745836
Q9BU76	Multiple myeloma tumor-associated protein 2	14.493	18	4	13	4	MMTAG2	971795	941321	1.03237
Q9BTY7	Protein HGH1 homolog	27.782	32	8	22	8	HGH1	6.1207e+06	6.02064e+06	1.01662
Q9BTW9	Tubulin-specific chaperone D	28.671	9	8	15	8	TBCD	4.44486e+06	3.12112e+06	1.42412
Q9BTT0	Acidic leucine-rich nuclear phosphoprotein 32 family member E	29.931	30	5	19	5	ANP32E	2.1425e+06	2.007e+06	1.06751
Q9BTE3	Mini-chromosome maintenance complex-binding protein	38.302	16	9	40	9	MCMBP	1.50861e+07	1.79642e+07	0.839791
Q9BT78	COP9 signalosome complex subunit 4	8.94	9	3	4	3	COPS4	794975	546211	1.45544
Q9BT73	Proteasome assembly chaperone 3	7.369	18	2	13	2	PSMG3	1.02547e+06	1.33975e+06	0.765421
Q9BSJ8	Extended synaptotagmin-1	11.487	3	3	7	3	ESYT1	1.29907e+06	1.39504e+06	0.93121
Q9BSD7	Cancer-related nucleoside-triphosphatase	6.475	13	2	3	2	NTPCR	1.16537e+06	925056	1.25979
Q9BS40	Latexin	40.678	27	7	81	7	LXN	3.32285e+07	3.94976e+07	0.841278
Q9BRZ2	E3 ubiquitin-protein ligase TRIM56	5.031	3	2	2	2	TRIM56	2184545	2.43844e+06	0.89588
Q9BRX8	Peroxiredoxin-like 2A	65.509	44	11	81	11	PRXL2A	4.73324e+06	3.5683e+06	1.32647
Q9BRJ6	Uncharacterized protein C7orf50	6.179	17	2	6	2	C7orf50	677940	797894	0.849662
Q9BRF8	Serine/threonine-protein phosphatase CPPED1	5.734	7	2	3	2	CPPED1	1.60226e+06	1.45095e+06	1.10429
Q9BRA2	Thioredoxin domain-containing protein 17	51.231	59	6	71	6	TXNDC17	7.53793e+06	9.03543e+06	0.834263
Q9BR76	Coronin-1B	40.693	23	11	86	11	CORO1B	1.46138e+07	1.5074e+07	0.969466
Q9BQG0	Myb-binding protein 1A	70.586	15	16	63	16	MYBBP1A	1.46457e+07	1.8893e+07	0.775188
Q9BQB6	Vitamin K epoxide reductase complex subunit 1	20.022	26	3	19	3	VKORC1	1.81245e+06	1.97635e+06	0.917069
Q9BQA1	Methylosome protein 50	29.418	28	7	25	7	WDR77	1.23155e+07	1.32199e+07	0.931586
Q9BQ70	Transcription factor 25	18.916	10	7	13	7	TCF25	2.77065e+06	3.66763e+06	0.755432
Q9BQ52	Zinc phosphodiesterase ELAC protein 2	23.598	12	6	18	6	ELAC2	4.14648e+06	4.48957e+06	0.923582
Q9BQ39	ATP-dependent RNA helicase DDX50	13.435	8	4	16	2	DDX50	4.67978e+06	5.40619e+06	0.865635
Q9BPX3	Condensin complex subunit 3	31.989	10	9	30	9	NCAPG	5.53294e+06	6.22023e+06	0.889506
Q99873	Protein arginine N-methyltransferase 1	135.854	44	18	160	15	PRMT1	5.70445e+07	5.72757e+07	0.995963
Q99848	Probable rRNA-processing protein EBP2	20.952	21	5	28	5	EBNA1BP2	2.83731e+06	2.46647e+06	1.15035
Q99832	T-complex protein 1 subunit eta	101.787	52	23	163	23	CCT7	5.44813e+07	5.49772e+07	0.99098
Q99829	Copine-1	10.146	8	3	13	3	CPNE1	2.11664e+06	2.85938e+06	0.740247
Q99816	Tumor susceptibility gene 101 protein	16.48	18	6	10	6	TSG101	2.6285e+06	2.79253e+06	0.94126
Q99747	Gamma-soluble NSF attachment protein	6.094	8	2	8	2	NAPG	914952	794537	1.15155
Q99735	Microsomal glutathione S-transferase 2	8.375	18	2	8	2	MGST2	1.66004e+06	1.48245e+06	1.1198
Q99733	Nucleosome assembly protein 1-like 4	17.511	15	4	27	3	NAP1L4	1.26586e+06	975205	1.29805
Q99729	Heterogeneous nuclear ribonucleoprotein A/B	60.685	23	12	70	11	HNRNPAB	3.30788e+07	3.30371e+07	1.00126
Q99714	3-hydroxyacyl-CoA dehydrogenase type-2	41.034	61	9	30	9	HSD17B10	2.64884e+06	1.94066e+06	1.36492
Q99623	Prohibitin-2	17.582	25	6	17	6	PHB2	4.04383e+06	3.23255e+06	1.25097
Q99615	DnaJ homolog subfamily C member 7	10.323	7	4	13	4	DNAJC7	4.67111e+06	4.60829e+06	1.01363
Q99613	Eukaryotic translation initiation factor 3 subunit C	165.706	30	33	264	33	EIF3C	1.04039e+08	7.60726e+07	1.36763
Q99611	Selenide, water dikinase 2	3.64	6	2	2	2	SEPHS2	709173	869777	0.815351
Q99575	Ribonucleases P/MRP protein subunit POP1	39.771	15	12	33	12	POP1	8.81725e+06	9.31296e+06	0.946772
Q99567	Nuclear pore complex protein Nup88	18.107	14	5	8	5	NUP88	579793	539943	1.0738
Q99543	DnaJ homolog subfamily C member 2	9.707	7	3	8	3	DNAJC2	1.33911e+06	1.28976e+06	1.03826
Q99497	Parkinson disease protein 7	57.461	65	11	46	11	PARK7	2.43955e+06	2.45704e+06	0.99288
Q99471	Prefoldin subunit 5	14.6	39	4	5	4	PFDN5	197671	234561	0.842728
Q99460	26S proteasome non-ATPase regulatory subunit 1	40.062	14	10	35	10	PSMD1	7.75768e+06	9.29489e+06	0.834618
Q99439	Calponin-2	7.857	10	2	3	2	CNN2	1.34647e+06	1.45244e+06	0.92704
Q99436	Proteasome subunit beta type-7	7.559	5	2	14	2	PSMB7	4.21534e+06	5.54952e+06	0.759587
Q99426	Tubulin-folding cofactor B	7.475	11	3	10	3	TBCB	6.49259e+06	4.6875e+06	1.38509
Q96TA1	Protein Niban 2	12.314	7	3	6	3	NIBAN2	609741	610003	0.999571
Q96T76	MMS19 nucleotide excision repair protein homolog	176.248	46	35	134	35	MMS19	7.12016e+07	7.9038e+07	0.900852
Q96SY0	Integrator complex subunit 14	6.097	4	2	6	2	INTS14	1.56511e+06	1.56872e+06	0.997699
Q96ST2	Protein IWS1 homolog	5.024	2	2	4	2	IWS1	447131	367448	1.21686
Q96SB4	SRSF protein kinase 1	15.942	11	5	14	4	SRPK1	2.24938e+06	2.83696e+06	0.792884
Q96RS6	NudC domain-containing protein 1	49.764	24	11	41	11	NUDCD1	1.59478e+07	1.82707e+07	0.872863
Q96RQ3	Methylcrotonoyl-CoA carboxylase subunit alpha, mitochondrial	110.043	41	23	148	23	MCCC1	3.38122e+07	2.63799e+07	1.28174
Q96QR8	Transcriptional activator protein Pur-beta	5.834	6	2	7	2	PURB	2.49555e+06	2.02861e+06	1.23017
Q96QK1	Vacuolar protein sorting-associated protein 35	51.942	19	12	39	12	VPS35	7.06353e+06	8.14541e+06	0.867179
Q96PZ0	Pseudouridylate synthase 7 homolog	49.726	25	12	35	12	PUS7	7.9845e+06	8.26657e+06	0.965878
Q96PK6	RNA-binding protein 14	12.049	8	4	10	4	RBM14	824735	1.10997e+06	0.743027
Q96P11	28S rRNA (cytosine-C(5))-methyltransferase	9.56	7	3	11	3	NSUN5	920997	1.09442e+06	0.841539
Q96KP4	Cytosolic non-specific dipeptidase	21.217	25	9	16	9	CNDP2	4769521	6.84644e+06	0.696643
Q96KB5	Lymphokine-activated killer T-cell-originated protein kinase	8.132	10	3	5	3	PBK	1.27333e+06	1.59493e+06	0.79836
Q96K76	Ubiquitin carboxyl-terminal hydrolase 47	12.008	3	3	13	3	USP47	2.29025e+06	3.28394e+06	0.697408
Q96I24	Far upstream element-binding protein 3	10.919	8	4	31	3	FUBP3	623841	685306	0.91031
Q96HY7	Probable 2-oxoglutarate dehydrogenase E1 component DHKTD1, mitochondrial	6.819	3	3	4	3	DHTKD1	302413	385963	0.783527
Q96HU1	Small G protein signaling modulator 3	10.29	5	3	4	3	SGSM3	1.626e+06	1.75727e+06	0.925304
Q96HS1	Serine/threonine-protein phosphatase PGAM5, mitochondrial	4.453	9	2	9	2	PGAM5	1.31779e+06	887473	1.48488
Q96HE7	ERO1-like protein alpha	31.135	21	8	23	8	ERO1A	450643	380916	1.18305
Q96HA8	Protein N-terminal glutamine amidohydrolase	25.938	36	5	14	5	NTAQ1	10470344	9.30768e+06	1.12491
Q96GQ5	RUS family member 1	4.2	4	2	3	2	RUSF1	438636	577811	0.759134
Q96GG9	DCN1-like protein 1	11.396	14	3	11	3	DCUN1D1	1.81543e+06	1.91903e+06	0.946015
Q96G23	Ceramide synthase 2	33.501	24	7	35	7	CERS2	7.36945e+06	6.61806e+06	1.11354
Q96G03	Phosphoglucomutase-2	13.716	10	5	11	5	PGM2	1.81503e+06	1.76134e+06	1.03048
Q96FX7	tRNA (adenine(58)-N(1))-methyltransferase catalytic subunit TRMT61A	26.519	21	4	31	4	TRMT61A	6.05114e+06	7.57389e+06	0.798948
Q96FW1	Ubiquitin thioesterase OTUB1	34.137	31	7	42	7	OTUB1	7.40676e+06	8.2914e+06	0.893306
Q96FQ6	Protein S100-A16	26.831	67	6	36	6	S100A16	5.0953e+06	3.79394e+06	1.34301
Q96FJ2	Dynein light chain 2, cytoplasmic	20.105	34	4	27	4	DYNLL2	7.27098e+06	7.21876e+06	1.00723
Q96F86	Enhancer of mRNA-decapping protein 3	11.832	9	3	6	3	EDC3	1.43637e+06	1.88229e+06	0.763098
Q96EK6	Glucosamine 6-phosphate N-acetyltransferase	20.799	49	5	21	5	GNPNAT1	7.7089e+06	8.55098e+06	0.901523
Q96EK5	KIF-binding protein	29.853	18	8	14	8	KIFBP	4.03341e+06	4.9184e+06	0.820066
Q96DG6	Carboxymethylenebutenolidase homolog	11.449	16	4	18	4	CMBL	3.1459e+06	3.18466e+06	0.987829
Q96CW1	AP-2 complex subunit mu	4.265	4	2	6	2	AP2M1	721485	837503	0.861472
Q96CP2	FLYWCH family member 2	9.947	41	4	11	4	FLYWCH2	1205566	983966	1.22521
Q96CN7	Isochorismatase domain-containing protein 1	36.905	34	7	31	7	ISOC1	1.11241e+07	1.19256e+07	0.932795
Q96C23	Galactose mutarotase	6.661	9	2	3	2	GALM	434620	547332	0.79407
Q96C19	EF-hand domain-containing protein D2	20.458	27	6	12	6	EFHD2	3.37276e+06	3.80814e+06	0.885672
Q96AY3	Peptidyl-prolyl cis-trans isomerase FKBP10	4.242	4	2	4	2	FKBP10	1.81254e+06	1.77023e+06	1.0239
Q96AG4	Leucine-rich repeat-containing protein 59	15.993	25	6	18	6	LRRC59	3.17557e+06	4.20345e+06	0.755467
Q96AE4	Far upstream element-binding protein 1	30.326	17	10	69	7	FUBP1	8.38012e+06	8.4165e+06	0.995678
Q96AB3	Isochorismatase domain-containing protein 2	52.126	66	8	37	8	ISOC2	2.33899e+07	2.78235e+07	0.840653
Q96A72	Protein mago nashi homolog 2	23.715	45	6	30	6	MAGOHB	4987104	4.62415e+06	1.07849
Q969Z0	FAST kinase domain-containing protein 4	10.04	4	2	5	2	TBRG4	4.62812e+06	5.20484e+06	0.889197
Q969U7	Proteasome assembly chaperone 2	7.735	8	3	4	3	PSMG2	1.62397e+06	1.46543e+06	1.10818
Q93009	Ubiquitin carboxyl-terminal hydrolase 7	130.867	37	33	94	33	USP7	3.56505e+07	4.28516e+07	0.831953
Q93008	Probable ubiquitin carboxyl-terminal hydrolase FAF-X	6.019	1	2	10	2	USP9X	2023027	2.26521e+06	0.893087
Q92979	Ribosomal RNA small subunit methyltransferase NEP1	5.219	9	2	6	2	EMG1	1.17994e+06	1.04179e+06	1.13261
Q92973	Transportin-1	27.255	10	7	21	6	TNPO1	5.13915e+06	5.29544e+06	0.970485
Q92945	Far upstream element-binding protein 2	52.499	26	14	81	12	KHSRP	2.42794e+07	2.67644e+07	0.907152
Q92905	COP9 signalosome complex subunit 5	5.337	5	2	6	2	COPS5	440113	341624	1.2883
Q92900	Regulator of nonsense transcripts 1	47.292	15	15	54	15	UPF1	8.09391e+06	8.45917e+06	0.95682
Q92841	Probable ATP-dependent RNA helicase DDX17	75.327	28	19	112	11	DDX17	1.10578e+07	1.09756e+07	1.00749
Q92769	Histone deacetylase 2	31.274	18	7	37	4	HDAC2	868486	1.12358e+06	0.772962
Q92688	Acidic leucine-rich nuclear phosphoprotein 32 family member B	48.969	33	10	87	6	ANP32B	29825479	2.96532e+07	1.00581
Q92621	Nuclear pore complex protein Nup205	7.333	2	3	8	3	NUP205	2.35788e+06	2.26548e+06	1.04079
Q92616	eIF-2-alpha kinase activator GCN1	404.942	40	88	431	88		9.1764e+07	1.08073e+08	0.849089
Q92598	Heat shock protein 105 kDa	102.82	35	24	95	22	HSPH1	2.31623e+07	2.16583e+07	1.06944
Q92597	Protein NDRG1	7.755	8	2	3	2	NDRG1	610666	420252	1.45309
Q92564	DCN1-like protein 4	18.254	17	5	14	4	DCUN1D4	3.65268e+06	5.33219e+06	0.685024
Q92544	Transmembrane 9 superfamily member 4	7.006	4	2	3	2	TM9SF4	2.31343e+06	1.83823e+06	1.2585
Q92522	Histone H1.10	31.24	28	6	50	6	H1-10	9.59946e+06	1.18713e+07	0.808625
Q92499	ATP-dependent RNA helicase DDX1	53.905	25	14	60	14	DDX1	1.60498e+07	1.83585e+07	0.874243
Q92466	DNA damage-binding protein 2	29.1	22	9	27	9	DDB2	8.22545e+06	7.88994e+06	1.04252
Q8WXA9	Splicing regulatory glutamine/lysine-rich protein 1	21.248	10	3	14	3	SREK1	1.1081e+06	843966	1.31297
Q8WWM7	Ataxin-2-like protein	18.681	7	7	21	7	ATXN2L	3.28918e+06	3.14162e+06	1.04697
Q8WVV9	Heterogeneous nuclear ribonucleoprotein L-like	6.105	7	3	13	2	HNRNPLL	598418	674400	0.887335
Q8WUY1	Protein THEM6	22.526	37	6	17	6	THEM6	2.42927e+06	1.93043e+06	1.25841
Q8WUM4	Programmed cell death 6-interacting protein	188.388	51	40	290	40	PDCD6IP	9.98997e+07	1.05063e+08	0.950859
Q8WUH6	Transmembrane protein 263	44.457	58	5	71	5	TMEM263	1.77335e+07	1.62301e+07	1.09263
Q8TF05	Serine/threonine-protein phosphatase 4 regulatory subunit 1	22.808	8	6	13	6	PPP4R1	3123902	2.94885e+06	1.05936
Q8TEX9	Importin-4	75.447	20	17	83	17	IPO4	1.75957e+07	2.19961e+07	0.799946
Q8TEQ6	Gem-associated protein 5	32.353	8	11	27	11	GEMIN5	6.32179e+06	6.43627e+06	0.982213
Q8TDN6	Ribosome biogenesis protein BRX1 homolog	27.693	25	8	31	8	BRIX1	5.99056e+06	5.41694e+06	1.10589
Q8TCT9	Minor histocompatibility antigen H13	10.502	11	3	6	3	HM13	4.12303e+06	3.86433e+06	1.06695
Q8TBX8	Phosphatidylinositol 5-phosphate 4-kinase type-2 gamma	8.549	7	2	5	2	PIP4K2C	1.50465e+06	1.54996e+06	0.970769
Q8TBQ9	Protein kish-A	4.182	25	2	10	2	TMEM167A	2.53523e+06	2.66527e+06	0.951207
Q8TBB5	Kelch domain-containing protein 4	6.187	4	2	8	2	KLHDC4	1.48621e+06	1.94902e+06	0.762541
Q8TB61	Adenosine 3'-phospho 5'-phosphosulfate transporter 1	4.619	5	2	5	2	SLC35B2	680676	710118	0.95854
Q8TAQ2	SWI/SNF complex subunit SMARCC2	8.648	2	2	3	2	SMARCC2	724607	764003	0.948434
Q8TA86	Retinitis pigmentosa 9 protein	5.313	12	2	2	2	RP9	345969	408779	0.846346
Q8NI27	THO complex subunit 2	14.683	4	5	9	5	THOC2	2.25416e+06	2.00745e+06	1.1229
Q8NFW8	N-acylneuraminate cytidylyltransferase	12.868	6	2	22	2	CMAS	3.90561e+06	5.57286e+06	0.700827
Q8NFU3	Thiosulfate:glutathione sulfurtransferase	5.277	19	2	5	2	TSTD1	964054	1.00887e+06	0.955582
Q8NFA0	Ubiquitin carboxyl-terminal hydrolase 32	26.227	6	7	17	7	USP32	5.32896e+06	6.5578e+06	0.812613
Q8NEZ5	F-box only protein 22	29.769	24	8	31	8	FBXO22	7.30929e+06	6.3556e+06	1.15005
Q8NE71	ATP-binding cassette sub-family F member 1	44.776	16	10	44	10	ABCF1	1.28812e+07	1.29727e+07	0.99295
Q8NDH3	Probable aminopeptidase NPEPL1	23.175	15	7	22	7	NPEPL1	7.08691e+06	9.15149e+06	0.774399
Q8ND56	Protein LSM14 homolog A	4.733	4	2	4	2	LSM14A	1.64124e+06	1.67468e+06	0.980032
Q8NCW5	NAD(P)H-hydrate epimerase	16.412	23	4	21	4	NAXE	3.13593e+06	4.57111e+06	0.686033
Q8NCA5	Protein FAM98A	17.872	14	5	20	5	FAM98A	1.7561e+06	1.79237e+06	0.979762
Q8NC51	Plasminogen activator inhibitor 1 RNA-binding protein	42.991	24	11	41	11	SERBP1	5.67506e+06	7.99519e+06	0.70981
Q8NBX0	Saccharopine dehydrogenase-like oxidoreductase	15.089	11	4	10	4	SCCPDH	3.08555e+06	3.06433e+06	1.00693
Q8NBS9	Thioredoxin domain-containing protein 5	53.83	36	14	71	14	TXNDC5	5.94716e+06	7.0244e+06	0.846643
Q8NBJ5	Procollagen galactosyltransferase 1	4.533	3	2	5	2	COLGALT1	921940	987827	0.933301
Q8NBF2	NHL repeat-containing protein 2	9.436	9	4	6	4	NHLRC2	496754	448952	1.10647
Q8NBA8	tRNA-uridine aminocarboxypropyltransferase 2	15.521	17	3	4	3	DTWD2	1441618	1.44405e+06	0.998315
Q8N9M5	Transmembrane protein 102	18.988	13	5	8	5	TMEM102	2.79503e+06	3.39319e+06	0.823717
Q8N8N7	Prostaglandin reductase 2	18.897	11	4	13	4	PTGR2	8.44351e+06	1.1846e+07	0.712776
Q8N806	Putative E3 ubiquitin-protein ligase UBR7	3.499	4	2	2	2	UBR7	2.81927e+06	2.80539e+06	1.00495
Q8N7H5	RNA polymerase II-associated factor 1 homolog	12.417	11	5	7	5	PAF1	1.15092e+06	1.14188e+06	1.00791
Q8N6R0	eEF1A lysine and N-terminal methyltransferase	5.75	5	3	3	3	METTL13	346708	424895	0.815984
Q8N6H7	ADP-ribosylation factor GTPase-activating protein 2	9.444	7	3	5	3	ARFGAP2	1.38658e+06	1.45336e+06	0.954054
Q8N5K1	CDGSH iron-sulfur domain-containing protein 2	4.872	15	2	5	2	CISD2	965767	1.0271e+06	0.940283
Q8N5I9	NOP protein chaperone 1	7.484	15	2	3	2	NOPCHAP1	1.99358e+06	2.02429e+06	0.984829
Q8N5F7	NF-kappa-B-activating protein	19.876	12	5	19	5	NKAP	3.26756e+06	3.53863e+06	0.923398
Q8N4V1	ER membrane protein complex subunit 5	11.5	24	2	11	2	MMGT1	3.57207e+06	3.88738e+06	0.918889
Q8N3U4	Cohesin subunit SA-2	7.074	2	3	4	3	STAG2	1.27885e+06	1.59345e+06	0.802568
Q8N1G4	Leucine-rich repeat-containing protein 47	31.114	20	8	23	8	LRRC47	3.285e+06	3.28943e+06	0.998651
Q8N1G2	Cap-specific mRNA (nucleoside-2'-O-)-methyltransferase 1	13.821	8	6	7	6	CMTR1	1.89876e+06	2.08814e+06	0.909307
Q8N0U8	Vitamin K epoxide reductase complex subunit 1-like protein 1	39.409	33	6	57	6	VKORC1L1	7.9585e+07	9.05263e+07	0.879137
Q8IZP2	Putative protein FAM10A4	14.328	18	4	26	4	ST13P4	4.32821e+06	3.39838e+06	1.27361
Q8IZL8	Proline-, glutamic acid- and leucine-rich protein 1	30.69	11	8	22	8	PELP1	5.58646e+06	5.71013e+06	0.978342
Q8IZ83	Aldehyde dehydrogenase family 16 member A1	14.678	7	4	9	4	ALDH16A1	1.5752e+06	1.59615e+06	0.986878
Q8IYB3	Serine/arginine repetitive matrix protein 1	48.137	14	10	55	10	SRRM1	2.28051e+07	1.63025e+07	1.39887
Q8IY81	pre-rRNA 2'-O-ribose RNA methyltransferase FTSJ3	32.508	15	10	26	10	FTSJ3	4.98212e+06	4.16056e+06	1.19746
Q8IWZ3	Ankyrin repeat and KH domain-containing protein 1	6.34	1	3	5	3	ANKHD1	752182	671962	1.11938
Q8IWX8	Calcium homeostasis endoplasmic reticulum protein	22.731	6	4	15	4	CHERP	4.18859e+06	4.88218e+06	0.857933
Q8IV36	Protein HID1	11.8	6	4	15	4	HID1	4.09614e+06	3.69958e+06	1.10719
Q86YV9	Hermansky-Pudlak syndrome 6 protein	12.268	5	3	5	3	HPS6	1.88652e+06	2.0278e+06	0.930329
Q86YP4	Transcriptional repressor p66-alpha	6.741	4	2	5	2	GATAD2A	286569	389120	0.736454
Q86Y56	Dynein axonemal assembly factor 5	18.885	8	7	18	7	DNAAF5	2.20254e+06	1.95056e+06	1.12919
Q86XP3	ATP-dependent RNA helicase DDX42	16.951	7	6	21	6	DDX42	3549304	2.86677e+06	1.23809
Q86X76	Deaminated glutathione amidase	55.944	45	12	30	12	NIT1	1.67592e+07	1.97665e+07	0.847858
Q86X55	Histone-arginine methyltransferase CARM1	18.452	14	5	16	5	CARM1	3.57951e+06	4.19466e+06	0.85335
Q86WB0	Nuclear-interacting partner of ALK	14.259	7	3	16	3	ZC3HC1	3.59118e+06	3.4853e+06	1.03038
Q86W42	THO complex subunit 6 homolog	12.705	17	5	9	5	THOC6	1.33732e+06	1.13159e+06	1.1818
Q86VY4	Testis-specific Y-encoded-like protein 5	31.194	26	7	17	7	TSPYL5	1.58269e+06	2.30363e+06	0.68704
Q86VP6	Cullin-associated NEDD8-dissociated protein 1	179.241	44	44	319	44	CAND1	111645350	1.23589e+08	0.903358
Q86VM9	Zinc finger CCCH domain-containing protein 18	17.415	5	4	13	4	ZC3H18	2.44237e+06	2.56674e+06	0.951548
Q86UV5	Ubiquitin carboxyl-terminal hydrolase 48	48.836	16	13	23	13	USP48	5.50107e+06	6.48704e+06	0.84801
Q86U42	Polyadenylate-binding protein 2	10.513	9	2	17	2	PABPN1	1.35987e+06	1.19471e+06	1.13824
Q7Z4W1	L-xylulose reductase	32.537	34	8	46	8	DCXR	7.8049e+06	1.05585e+07	0.739207
Q7Z4V5	Hepatoma-derived growth factor-related protein 2	30.026	12	6	39	4	HDGFL2	1.0948e+07	8.32485e+06	1.3151
Q7Z3K3	Pogo transposable element with ZNF domain	4.464	2	2	8	2	POGZ	893344	1.14971e+06	0.777013
Q7Z3C6	Autophagy-related protein 9A	8.476	4	3	4	3	ATG9A	4.93289e+06	4.78901e+06	1.03004
Q7Z2W9	39S ribosomal protein L21, mitochondrial	7.985	14	2	11	2	MRPL21	184399	130767	1.41014
Q7Z2W4	Zinc finger CCCH-type antiviral protein 1	12.195	5	4	7	4	ZC3HAV1	5.26082e+06	5.99709e+06	0.877228
Q7RTV0	PHD finger-like domain-containing protein 5A	4.688	15	2	15	2	PHF5A	1.70989e+06	1.61974e+06	1.05566
Q7L9L4	MOB kinase activator 1B	13.256	14	3	15	3	MOB1B	2360299	2.93209e+06	0.804989
Q7L7L0	Histone H2A type 3	84.177	46	13	427	3	H2AW	1.11866e+07	1.22993e+07	0.90953
Q7L576	Cytoplasmic FMR1-interacting protein 1	29.926	10	11	26	11	CYFIP1	4.66711e+06	5.93306e+06	0.786628
Q7L4I2	Arginine/serine-rich coiled-coil protein 2	11.979	7	3	9	3	RSRC2	2.27325e+06	2.29536e+06	0.990367
Q7L2J0	7SK snRNA methylphosphate capping enzyme	25.831	13	8	24	8	MEPCE	5.6955e+06	5.87e+06	0.970272
Q7L2H7	Eukaryotic translation initiation factor 3 subunit M	20.575	20	6	11	6	EIF3M	2.44683e+06	2.79563e+06	0.875232
Q7L1Q6	Basic leucine zipper and W2 domain-containing protein 1	21.769	17	8	32	6	BZW1	6.43123e+06	7.353e+06	0.87464
Q7L014	Probable ATP-dependent RNA helicase DDX46	105.058	27	28	191	28	DDX46	4.8199e+07	4.02573e+07	1.19727
Q7KZF4	Staphylococcal nuclease domain-containing protein 1	101.034	42	27	135	27	SND1	2.31848e+07	2.32696e+07	0.996356
Q71UI9	Histone H2A.V	24.875	31	5	298	3	H2AZ2	1.49888e+07	1.29798e+07	1.15478
Q6UXN9	WD repeat-containing protein 82	24.813	17	5	21	5	WDR82	2.68977e+06	2.86773e+06	0.937943
Q6UW68	Transmembrane protein 205	19.864	35	4	21	4	TMEM205	1.52231e+07	1.61851e+07	0.940563
Q6PKG0	La-related protein 1	36.277	13	13	38	13	LARP1	8.11015e+06	1.02248e+07	0.793184
Q6PJG6	BRCA1-associated ATM activator 1	50.64	23	14	27	14	BRAT1	6.76136e+06	7.24855e+06	0.932788
Q6PI48	Aspartate--tRNA ligase, mitochondrial	5.243	3	2	7	2	DARS2	342276	293944	1.16443
Q6P996	Pyridoxal-dependent decarboxylase domain-containing protein 1	13.76	9	5	8	5	PDXDC1	3.41703e+06	2.81055e+06	1.21579
Q6P5R6	60S ribosomal protein L22-like 1	19.83	37	4	26	2	RPL22L1	5.06239e+06	3.49037e+06	1.45039
Q6P587	Acylpyruvase FAHD1, mitochondrial	7.866	13	3	7	3	FAHD1	1.00648e+07	8.07106e+06	1.24703
Q6P2Q9	Pre-mRNA-processing-splicing factor 8	120.606	19	38	127	38	PRPF8	1.88764e+07	1.92938e+07	0.978364
Q6P1N9	Putative deoxyribonuclease TATDN1	6.431	8	2	3	2	TATDN1	844773	1.02797e+06	0.821787
Q6NXG1	Epithelial splicing regulatory protein 1	35.426	19	8	32	7	ESRP1	1.07378e+07	1.26106e+07	0.85149
Q6ICB0	Desumoylating isopeptidase 1	11.377	20	2	12	2	DESI1	196967	231813	0.84968
Q6GMV2	Histone-lysine N-trimethyltransferase SMYD5	15.959	13	4	10	4	SMYD5	2.42356e+06	2.7135e+06	0.89315
Q6FI81	Anamorsin	17.264	25	7	16	7	CIAPIN1	6.4148e+06	8.7589e+06	0.732374
Q6DKI1	60S ribosomal protein L7-like 1	7.071	9	2	10	2	RPL7L1	990447	682529	1.45114
Q6DD88	Atlastin-3	5.844	5	3	5	3	ATL3	383124	410115	0.934187
Q6AI08	HEAT repeat-containing protein 6	68.363	22	18	61	18	HEATR6	1.37978e+07	1.89226e+07	0.729172
Q68E01	Integrator complex subunit 3	24.062	9	6	15	6	INTS3	2.52735e+06	2.0003e+06	1.26349
Q66PJ3	ADP-ribosylation factor-like protein 6-interacting protein 4	7.775	7	2	7	2		2.13281e+06	1.43449e+06	1.48681
Q66K14	TBC1 domain family member 9B	18.093	5	6	18	6	TBC1D9B	4.0503e+06	3.7658e+06	1.07555
Q658Y4	Protein FAM91A1	7.508	3	2	5	2	FAM91A1	576420	501395	1.14963
Q5VZE5	N-alpha-acetyltransferase 35, NatC auxiliary subunit	14.311	4	4	8	4	NAA35	3.2396e+06	3.2407e+06	0.999661
Q5VYK3	Proteasome adapter and scaffold protein ECM29	11.926	3	5	15	5	ECPAS	1.70647e+06	1.89323e+06	0.901355
Q5VWZ2	Lysophospholipase-like protein 1	17.859	27	5	18	5	LYPLAL1	2.75782e+06	3.09662e+06	0.890588
Q5VW32	BRO1 domain-containing protein BROX	11.817	12	3	4	3	BROX	1.66877e+06	1.87693e+06	0.889095
Q5VTL8	Pre-mRNA-splicing factor 38B	31.861	18	9	51	9	PRPF38B	2.80343e+07	3.20112e+07	0.875765
Q5TFE4	5'-nucleotidase domain-containing protein 1	39.471	20	8	21	8	NT5DC1	3.51061e+06	4.71431e+06	0.74467
Q5TAQ9	DDB1- and CUL4-associated factor 8	6.6	5	2	2	2	DCAF8	304693	445026	0.684663
Q5T4S7	E3 ubiquitin-protein ligase UBR4	12.839	1	5	14	5	UBR4	2.03665e+06	2.51967e+06	0.8083
Q5T1V6	Probable ATP-dependent RNA helicase DDX59	27.327	16	8	15	8	DDX59	5.06249e+06	5.47379e+06	0.92486
Q5T160	Probable arginine--tRNA ligase, mitochondrial	15.015	5	2	10	2	RARS2	272173	350977	0.775471
Q5SSJ5	Heterochromatin protein 1-binding protein 3	33.182	19	11	42	11	HP1BP3	8.41296e+06	5.94916e+06	1.41414
Q5QNW6	Histone H2B type 2-F	209.069	84	21	527	2	H2BC18	7.25529e+08	6.91571e+08	1.0491
Q5JTY5	COBW domain-containing protein 3	9.432	9	2	8	2	CBWD3	1.20514e+06	1.45585e+06	0.827786
Q5JTH9	RRP12-like protein	30.227	9	9	19	9	RRP12	2.11055e+06	2.91934e+06	0.722955
Q5JRX3	Presequence protease, mitochondrial	11.489	5	4	15	4	PITRM1	1.44832e+06	1.292e+06	1.12099
Q5H9R7	Serine/threonine-protein phosphatase 6 regulatory subunit 3	42.937	17	13	32	13	PPP6R3	1.51387e+08	1.93852e+08	0.780943
Q58FF7	Putative heat shock protein HSP 90-beta-3	138.318	25	24	569	2	HSP90AB3P	3.42445e+06	2.6625e+06	1.28618
Q562R1	Beta-actin-like protein 2	95.247	34	13	254	3	ACTBL2	2.30028e+06	1.83316e+06	1.25482
Q53H96	Pyrroline-5-carboxylate reductase 3	8.642	12	3	8	3	PYCR3	2219940	2.96286e+06	0.749256
Q53EL6	Programmed cell death protein 4	33.436	23	8	37	8	PDCD4	1.34966e+07	1.38662e+07	0.973345
Q4KMP7	TBC1 domain family member 10B	16.882	9	4	6	4	TBC1D10B	1.46642e+06	1.43783e+06	1.01989
Q4G0X4	BTB/POZ domain-containing protein KCTD21	4.519	6	2	3	2	KCTD21	1.44626e+06	1.43005e+06	1.01134
Q3YEC7	Rab-like protein 6	15.83	9	6	12	6	RABL6	2.59227e+06	3.20176e+06	0.809638
Q2VPK5	Cytoplasmic tRNA 2-thiolation protein 2	8.718	9	4	5	4	CTU2	371506	545066	0.681578
Q2T9J0	Peroxisomal leader peptide-processing protease	54.083	26	10	37	10	TYSND1	1.29514e+07	1.31167e+07	0.9874
Q2NL82	Pre-rRNA-processing protein TSR1 homolog	11.252	6	4	7	4	TSR1	2.19965e+06	2.18891e+06	1.00491
Q29RF7	Sister chromatid cohesion protein PDS5 homolog A	20.114	7	8	16	7	PDS5A	3.83696e+06	3.32836e+06	1.15281
Q1KMD3	Heterogeneous nuclear ribonucleoprotein U-like protein 2	26.694	13	8	30	8	HNRNPUL2	4.76514e+06	4.40501e+06	1.08176
Q17RN3	Protein FAM98C	7.871	9	2	2	2	FAM98C	807296	1.04673e+06	0.771257
Q16881	Thioredoxin reductase 1, cytoplasmic	216.3	57	28	261	27	TXNRD1	4.83134e+07	5.14437e+07	0.939151
Q16851	UTP--glucose-1-phosphate uridylyltransferase	32.415	24	10	28	10	UGP2	6.22807e+06	5.87788e+06	1.05958
Q16836	Hydroxyacyl-coenzyme A dehydrogenase, mitochondrial	9.685	14	4	7	4	HADH	1.75441e+06	2.08886e+06	0.839889
Q16822	Phosphoenolpyruvate carboxykinase [GTP], mitochondrial	4.565	3	2	2	2	PCK2	1.36896e+06	1.07383e+06	1.27484
Q16777	Histone H2A type 2-C	109.268	47	14	498	4	H2AC20	1.95168e+09	1.9315e+09	1.01045
Q16719	Kynureninase	21.268	18	7	14	7	KYNU	1.51248e+06	1.39221e+06	1.08638
Q16629	Serine/arginine-rich splicing factor 7	36.484	28	8	75	7	SRSF7	2.86584e+07	1.97678e+07	1.44975
Q16576	Histone-binding protein RBBP7	36.692	31	8	26	4	RBBP7	72884012	9.68006e+07	0.75293
Q16555	Dihydropyrimidinase-related protein 2	4.619	3	2	5	2	DPYSL2	1191699	913833	1.30407
Q16543	Hsp90 co-chaperone Cdc37	19.153	15	4	18	4	CDC37	6.30327e+06	5.68047e+06	1.10964
Q16531	DNA damage-binding protein 1	70.57	21	20	74	20	DDB1	11883366	1.38315e+07	0.859153
Q16401	26S proteasome non-ATPase regulatory subunit 5	26.044	16	7	24	7	PSMD5	4.03087e+06	5.49634e+06	0.733374
Q16204	Coiled-coil domain-containing protein 6	8.045	5	2	5	2	CCDC6	380980	503499	0.756665
Q16186	Proteasomal ubiquitin receptor ADRM1	9.457	10	3	9	3	ADRM1	3.72846e+06	3.67104e+06	1.01564
Q16181	Septin-7	14.214	14	5	10	4	SEPTIN7	2.85981e+06	2.55796e+06	1.118
Q15738	Sterol-4-alpha-carboxylate 3-dehydrogenase, decarboxylating	3.546	8	2	3	2	NSDHL	1372014	1.11999e+06	1.22503
Q15717	ELAV-like protein 1	27.574	31	8	33	8	ELAVL1	1.26079e+07	1.65154e+07	0.763401
Q15691	Microtubule-associated protein RP/EB family member 1	31.687	38	8	32	8	MAPRE1	9.07095e+06	1.05899e+07	0.856564
Q15654	Thyroid receptor-interacting protein 6	53.529	40	11	45	11	TRIP6	9.6005e+06	1.02274e+07	0.938706
Q15645	Pachytene checkpoint protein 2 homolog	47.095	29	11	26	11	TRIP13	5.056e+06	6.43955e+06	0.785148
Q15631	Translin	32.953	32	7	24	7	TSN	8.60006e+06	1.01704e+07	0.845598
Q15437	Protein transport protein Sec23B	40.001	17	10	35	7	SEC23B	7.12862e+06	7.66578e+06	0.929928
Q15436	Protein transport protein Sec23A	21.345	10	6	17	3	SEC23A	962013	1.37679e+06	0.698735
Q15418	Ribosomal protein S6 kinase alpha-1	128.502	40	26	83	18	RPS6KA1	3.93898e+07	4.3112e+07	0.913661
Q15393	Splicing factor 3B subunit 3	79.86	19	17	88	17	SF3B3	2.67666e+07	2.71441e+07	0.986093
Q15386	Ubiquitin-protein ligase E3C	41.822	12	12	31	12	UBE3C	7.28664e+06	8.41375e+06	0.866039
Q15370	Elongin-B	10.831	36	4	12	4	ELOB	1.41362e+06	1.58002e+06	0.894686
Q15366	Poly(rC)-binding protein 2	64.153	40	11	108	7	PCBP2	3.51487e+07	4.30421e+07	0.816612
Q15365	Poly(rC)-binding protein 1	91.81	48	13	151	9	PCBP1	9.54236e+07	1.11913e+08	0.852659
Q15274	Nicotinate-nucleotide pyrophosphorylase [carboxylating]	4.784	7	2	3	2	QPRT	710224	957149	0.74202
Q15269	Periodic tryptophan protein 2 homolog	9.404	4	3	8	3	PWP2	1.8899e+06	2.56753e+06	0.736076
Q15257	Serine/threonine-protein phosphatase 2A activator	19.207	22	6	16	6	PTPA	5.74418e+06	4.01339e+06	1.43125
Q15233	Non-POU domain-containing octamer-binding protein	33.658	18	9	31	8	NONO	5.24298e+06	5.04426e+06	1.0394
Q15185	Prostaglandin E synthase 3	20.504	37	5	45	5	PTGES3	1.60046e+07	1.81655e+07	0.881045
Q15181	Inorganic pyrophosphatase	47.633	53	12	65	11	PPA1	1.3981e+07	1.5432e+07	0.905976
Q15126	Phosphomevalonate kinase	20.209	39	7	15	7	PMVK	7.50453e+06	6.26123e+06	1.19857
Q15102	Platelet-activating factor acetylhydrolase IB subunit alpha1	25.339	40	7	41	7	PAFAH1B3	7.56394e+06	8.88316e+06	0.851492
Q15084	Protein disulfide-isomerase A6	116.459	49	18	129	18	PDIA6	1.19351e+07	1.13872e+07	1.04811
Q15056	Eukaryotic translation initiation factor 4H	12.681	19	4	20	4	EIF4H	2.75321e+06	2.5668e+06	1.07262
Q15046	Lysine--tRNA ligase	72.973	27	17	92	17	KARS1	2.27021e+07	1.99958e+07	1.13534
Q15029	116 kDa U5 small nuclear ribonucleoprotein component	61.345	23	17	66	16	EFTUD2	6.96633e+06	5.38797e+06	1.29294
Q15021	Condensin complex subunit 1	89.784	22	27	68	27	NCAPD2	5.31397e+07	5.85795e+07	0.907139
Q15020	Squamous cell carcinoma antigen recognized by T-cells 3	38.27	15	12	21	12	SART3	3.70804e+06	3.41828e+06	1.08477
Q15008	26S proteasome non-ATPase regulatory subunit 6	84.316	46	19	132	19	PSMD6	3.36114e+07	3.51353e+07	0.956628
Q15005	Signal peptidase complex subunit 2	24.143	38	7	19	7	SPCS2	6.86605e+06	6.45636e+06	1.06346
Q15003	Condensin complex subunit 2	27.327	16	8	13	8	NCAPH	4.64053e+06	5.4991e+06	0.843871
Q14CX7	N-alpha-acetyltransferase 25, NatB auxiliary subunit	10.014	4	4	6	4	NAA25	575051	751064	0.765648
Q14C86	GTPase-activating protein and VPS9 domain-containing protein 1	5.33	1	2	3	2	GAPVD1	929842	1.04391e+06	0.89073
Q14980	Nuclear mitotic apparatus protein 1	115.923	22	33	89	33	NUMA1	1.50023e+07	1.39622e+07	1.07449
Q14978	Nucleolar and coiled-body phosphoprotein 1	16.706	8	5	27	5	NOLC1	2.21016e+06	3.1444e+06	0.702889
Q14974	Importin subunit beta-1	142.687	40	27	211	27	KPNB1	7.88684e+07	8.77184e+07	0.899109
Q14919	Dr1-associated corepressor	6.606	11	2	7	2	DRAP1	853273	626552	1.36185
Q14847	LIM and SH3 domain protein 1	13.158	16	5	25	5	LASP1	3.45788e+06	4.33541e+06	0.797588
Q14839	Chromodomain-helicase-DNA-binding protein 4	51.728	8	13	53	9	CHD4	1.07932e+07	1.12411e+07	0.960159
Q14790	Caspase-8	10.553	8	4	5	4	CASP8	1190573	1.08754e+06	1.09474
Q14738	Serine/threonine-protein phosphatase 2A 56 kDa regulatory subunit delta isoform	9.161	5	3	9	3	PPP2R5D	2.80422e+06	2.65731e+06	1.05529
Q14697	Neutral alpha-glucosidase AB	111.054	31	26	190	26	GANAB	2.56927e+07	2.97782e+07	0.862802
Q14694	Ubiquitin carboxyl-terminal hydrolase 10	65.305	25	15	42	15	USP10	1.82565e+07	2.16128e+07	0.844706
Q14683	Structural maintenance of chromosomes protein 1A	39.331	12	14	38	14	SMC1A	9.87257e+06	1.02151e+07	0.96647
Q14653	Interferon regulatory factor 3	14.517	7	2	8	2	IRF3	762459	1.14948e+06	0.663309
Q14566	DNA replication licensing factor MCM6	74.48	26	18	99	18	MCM6	2.07823e+07	2.45961e+07	0.844942
Q14498	RNA-binding protein 39	54.973	27	12	78	12	RBM39	13931898	1.45057e+07	0.960446
Q14258	E3 ubiquitin/ISG15 ligase TRIM25	78.775	29	17	76	17	TRIM25	4.91138e+07	5.33999e+07	0.919735
Q14247	Src substrate cortactin	77.861	43	22	103	22	CTTN	2.23071e+07	1.98413e+07	1.12428
Q14232	Translation initiation factor eIF-2B subunit alpha	10.502	13	4	14	4	EIF2B1	1.50045e+06	1.84807e+06	0.811901
Q14204	Cytoplasmic dynein 1 heavy chain 1	138.669	11	42	127	42	DYNC1H1	3.82219e+07	4.21239e+07	0.907368
Q14166	Tubulin--tyrosine ligase-like protein 12	72.915	41	18	57	18	TTLL12	2.44657e+07	3.2425e+07	0.754532
Q14157	Ubiquitin-associated protein 2-like	8.817	4	3	9	3	UBAP2L	1.15397e+06	1.02332e+06	1.12766
Q14152	Eukaryotic translation initiation factor 3 subunit A	104.659	24	30	126	30	EIF3A	3.38234e+07	3.48862e+07	0.969533
Q14145	Kelch-like ECH-associated protein 1	33.457	21	11	33	11	KEAP1	9.29089e+06	1.14234e+07	0.813322
Q14139	Ubiquitin conjugation factor E4 A	16.772	3	2	8	2	UBE4A	5.34451e+06	6.74003e+06	0.79295
Q14103	Heterogeneous nuclear ribonucleoprotein D0	23.325	20	6	43	4	HNRNPD	1.58128e+07	1.47454e+07	1.07239
Q14008	Cytoskeleton-associated protein 5	13.824	3	5	7	5	CKAP5	2.71509e+06	2.82473e+06	0.961184
Q13907	Isopentenyl-diphosphate Delta-isomerase 1	11.942	19	4	11	4	IDI1	447543	585910	0.763842
Q13838	Spliceosome RNA helicase DDX39B	64.42	35	16	100	4	DDX39B	973424	1.47107e+06	0.661711
Q13823	Nucleolar GTP-binding protein 2	7.455	3	3	10	3	GNL2	1.88798e+06	1.99503e+06	0.946337
Q13765	Nascent polypeptide-associated complex subunit alpha	46.686	27	7	49	7	NACA	17606471	1.2275e+07	1.43434
Q13630	GDP-L-fucose synthase	23.358	26	6	22	6	GFUS	3.79444e+06	4.75267e+06	0.79838
Q13618	Cullin-3	12.665	8	5	7	5	CUL3	398821	401537	0.993235
Q13617	Cullin-2	5.426	3	2	5	2	CUL2	614886	848134	0.724986
Q13616	Cullin-1	25.827	12	8	27	8	CUL1	9.74577e+06	1.0015e+07	0.973121
Q13596	Sorting nexin-1	18.578	13	6	12	4	SNX1	2.78625e+06	2.69875e+06	1.03242
Q13595	Transformer-2 protein homolog alpha	12.708	12	4	23	3	TRA2A	2.88282e+06	1.99382e+06	1.44587
Q13573	SNW domain-containing protein 1	12.216	8	4	7	4	SNW1	1.21427e+06	823441	1.47463
Q13572	Inositol-tetrakisphosphate 1-kinase	8.137	10	3	5	3	ITPK1	1.15748e+06	1.44431e+06	0.801406
Q13561	Dynactin subunit 2	44.098	30	10	34	10	DCTN2	1.4222e+07	1.64069e+07	0.866828
Q13547	Histone deacetylase 1	33.533	18	8	48	5	HDAC1	9.89937e+06	1.0878e+07	0.91004
Q13546	Receptor-interacting serine/threonine-protein kinase 1	8.686	6	3	5	3	RIPK1	1.6236e+06	2.31601e+06	0.701036
Q13509	Tubulin beta-3 chain	126.547	44	18	400	2	TUBB3	923011	792459	1.16474
Q13435	Splicing factor 3B subunit 2	36.99	15	14	56	14	SF3B2	1.63217e+07	1.5399e+07	1.05992
Q13428	Treacle protein	54.377	11	14	84	14	TCOF1	1.88138e+07	1.57433e+07	1.19504
Q13404	Ubiquitin-conjugating enzyme E2 variant 1	14.018	33	5	31	5	UBE2V1	3.91694e+06	4.05448e+06	0.966077
Q13363	C-terminal-binding protein 1	7.974	6	3	4	3	CTBP1	792193	905825	0.874554
Q13347	Eukaryotic translation initiation factor 3 subunit I	7.323	12	3	6	3	EIF3I	1.69859e+06	1.36786e+06	1.24178
Q13330	Metastasis-associated protein MTA1	11.083	6	4	15	3	MTA1	4.72798e+06	3.31169e+06	1.42766
Q13310	Polyadenylate-binding protein 4	48.79	24	13	58	4	PABPC4	1676815	2.24428e+06	0.747152
Q13263	Transcription intermediary factor 1-beta	97.762	28	20	131	20	TRIM28	2.7615e+07	3.40689e+07	0.810564
Q13228	Methanethiol oxidase	53.273	39	14	53	14	SELENBP1	8.98927e+06	1.03283e+07	0.870352
Q13200	26S proteasome non-ATPase regulatory subunit 2	109.96	34	23	128	23	PSMD2	2.92018e+07	2.91403e+07	1.00211
Q13185	Chromobox protein homolog 3	32.562	37	6	25	5	CBX3	7.72875e+06	5.18358e+06	1.49101
Q13177	Serine/threonine-protein kinase PAK 2	33.288	25	10	26	10	PAK2	4.6192e+06	3.92182e+06	1.17782
Q13162	Peroxiredoxin-4	32.661	25	7	41	4	PRDX4	1.23997e+06	1.12262e+06	1.10453
Q13155	Aminoacyl tRNA synthase complex-interacting multifunctional protein 2	27.32	28	6	31	6	AIMP2	1.34856e+07	1.32192e+07	1.02015
Q13151	Heterogeneous nuclear ribonucleoprotein A0	33.757	25	7	60	5	HNRNPA0	6.67082e+06	6.36833e+06	1.0475
Q13148	TAR DNA-binding protein 43	23.51	18	5	15	5	TARDBP	5.73085e+06	5.60939e+06	1.02165
Q13144	Translation initiation factor eIF-2B subunit epsilon	12.27	6	4	5	4	EIF2B5	402901	408093	0.987279
Q13131	5'-AMP-activated protein kinase catalytic subunit alpha-1	16.113	8	3	9	3	PRKAA1	2.50594e+06	1.83853e+06	1.36301
Q13098	COP9 signalosome complex subunit 1	8.708	9	4	8	4	GPS1	761806	908899	0.838163
Q13085	Acetyl-CoA carboxylase 1	275.965	36	64	248	64	ACACA	2.94898e+07	3.06079e+07	0.96347
Q13057	Bifunctional coenzyme A synthase	15.103	15	6	8	6	COASY	4.78437e+06	3.87948e+06	1.23325
Q13045	Protein flightless-1 homolog	70.508	18	20	55	20	FLII	2.23626e+07	2.54515e+07	0.878639
Q13011	Delta(3,5)-Delta(2,4)-dienoyl-CoA isomerase, mitochondrial	23.905	14	5	49	5	ECH1	1.01569e+07	8.58178e+06	1.18354
Q12931	Heat shock protein 75 kDa, mitochondrial	60.758	28	17	96	16	TRAP1	1.3238e+07	9.99747e+06	1.32414
Q12907	Vesicular integral-membrane protein VIP36	17.814	21	6	20	6	LMAN2	2.51049e+06	2.31422e+06	1.08481
Q12906	Interleukin enhancer-binding factor 3	74.403	22	18	137	15	ILF3	3.16464e+07	3.24784e+07	0.974383
Q12905	Interleukin enhancer-binding factor 2	39.959	33	10	70	10	ILF2	1.3149e+07	1.382e+07	0.951451
Q12904	Aminoacyl tRNA synthase complex-interacting multifunctional protein 1	4.355	10	2	4	2	AIMP1	915236	843375	1.08521
Q12873	Chromodomain-helicase-DNA-binding protein 3	24.673	4	7	23	3	CHD3	304999	242737	1.2565
Q12849	G-rich sequence factor 1	14.157	9	3	9	3	GRSF1	1.4002e+06	1.29659e+06	1.07991
Q12792	Twinfilin-1	31.801	26	8	43	8	TWF1	1.32023e+07	1.45851e+07	0.905189
Q12789	General transcription factor 3C polypeptide 1	8.177	2	3	4	3	GTF3C1	7846326	8.29188e+06	0.946266
Q12768	WASH complex subunit 5	9.038	3	3	12	3	WASHC5	2.32655e+06	1.82438e+06	1.27526
Q10567	AP-1 complex subunit beta-1	62.031	24	17	55	17		1.26385e+07	1.34841e+07	0.937287
Q0VGL1	Ragulator complex protein LAMTOR4	5.543	29	2	3	2	LAMTOR4	3.03319e+07	3.87055e+07	0.783659
Q0VDF9	Heat shock 70 kDa protein 14	8.766	10	3	3	3	HSPA14	346792	287067	1.20805
Q09666	Neuroblast differentiation-associated protein AHNAK	54.931	14	19	39	19	AHNAK	9.86543e+06	9.95703e+06	0.990801
Q09161	Nuclear cap-binding protein subunit 1	64.398	22	15	61	15	NCBP1	3.39007e+07	3.31455e+07	1.02278
Q08J23	RNA cytosine C(5)-methyltransferase NSUN2	49.971	26	14	33	14	NSUN2	6.84772e+06	9.77382e+06	0.700619
Q08AF3	Schlafen family member 5	5.703	2	2	2	2	SLFN5	950318	951233	0.999038
Q08211	ATP-dependent RNA helicase A	150.883	32	34	194	34	DHX9	5.46659e+07	5.61115e+07	0.974238
Q07960	Rho GTPase-activating protein 1	45.745	36	11	68	11	ARHGAP1	1.01578e+07	1.46572e+07	0.693025
Q07866	Kinesin light chain 1	18.586	10	5	11	5	KLC1	1.50305e+06	1.79888e+06	0.835548
Q07812	Apoptosis regulator BAX	17.987	30	5	17	5	BAX	3.07088e+06	2.67699e+06	1.14714
Q07666	KH domain-containing, RNA-binding, signal transduction-associated protein 1	26.482	19	8	33	8	KHDRBS1	1.78457e+07	1.89394e+07	0.942252
Q07020	60S ribosomal protein L18	158.776	62	21	516	21	RPL18	1.18651e+09	8.03037e+08	1.47753
Q06830	Peroxiredoxin-1	99.899	76	18	188	14	PRDX1	7.68009e+07	7.28248e+07	1.0546
Q06787	Synaptic functional regulator FMR1	18.177	10	6	14	4	FMR1	1.55701e+07	1.66786e+07	0.933539
Q06323	Proteasome activator complex subunit 1	67.682	54	16	93	16	PSME1	1.37618e+07	1.36425e+07	1.00875
Q06210	Glutamine--fructose-6-phosphate aminotransferase [isomerizing] 1	65.138	32	18	44	18	GFPT1	1.31746e+07	1.31214e+07	1.00405
Q06203	Amidophosphoribosyltransferase	28.936	17	7	32	7	PPAT	7.71929e+06	7.32929e+06	1.05321
Q05655	Protein kinase C delta type	18.675	9	6	13	6	PRKCD	1.95389e+06	2.79436e+06	0.699225
Q05639	Elongation factor 1-alpha 2	195.71	59	24	854	9	EEF1A2	3.07933e+07	3.65396e+07	0.842738
Q05519	Serine/arginine-rich splicing factor 11	53.181	19	7	101	7	SRSF11	3.60556e+07	2.86746e+07	1.2574
Q04917	14-3-3 protein eta	51.553	39	12	91	7	YWHAH	7.8826e+06	6.57326e+06	1.19919
Q04864	Proto-oncogene c-Rel	4.665	4	2	5	2	REL	441264	511438	0.862789
Q04837	Single-stranded DNA-binding protein, mitochondrial	20.479	47	6	18	6	SSBP1	2.99838e+06	3.16172e+06	0.948337
Q04760	Lactoylglutathione lyase	42.279	47	8	36	8	GLO1	7.03595e+06	6.40352e+06	1.09876
Q04637	Eukaryotic translation initiation factor 4 gamma 1	139.229	25	34	159	34	EIF4G1	8.25059e+07	9.07952e+07	0.908704
Q04446	1,4-alpha-glucan-branching enzyme	12.384	5	3	13	3	GBE1	5.25038e+06	6.05684e+06	0.866851
Q03518	Antigen peptide transporter 1	26.837	16	6	14	6	TAP1	6.16228e+06	8.28923e+06	0.743408
Q03426	Mevalonate kinase	8.029	6	2	7	2	MVK	716642	928087	0.772171
Q02978	Mitochondrial 2-oxoglutarate/malate carrier protein	15.8	18	4	14	4	SLC25A11	2.24287e+06	1.89412e+06	1.18412
Q02878	60S ribosomal protein L6	293.811	65	42	775	42	RPL6	6.75828e+08	5.18847e+08	1.30256
Q02790	Peptidyl-prolyl cis-trans isomerase FKBP4	94.164	52	21	131	21	FKBP4	36087742	3.86707e+07	0.933206
Q02750	Dual specificity mitogen-activated protein kinase kinase 1	28.396	18	8	41	4	MAP2K1	1.06996e+07	1.10337e+07	0.969719
Q02543	60S ribosomal protein L18a	87.195	68	18	254	18	RPL18A	2.08572e+08	1.89236e+08	1.10218
Q01844	RNA-binding protein EWS	6.032	4	2	6	2	EWSR1	841930	624658	1.34783
Q01813	ATP-dependent 6-phosphofructokinase, platelet type	72.645	30	19	98	16	PFKP	2.84731e+07	2.20204e+07	1.29304
Q01650	Large neutral amino acids transporter small subunit 1	20.238	12	5	28	5	SLC7A5	3.89824e+06	3.70851e+06	1.05116
Q01581	Hydroxymethylglutaryl-CoA synthase, cytoplasmic	135.258	69	25	106	25	HMGCS1	1.19485e+08	1.39451e+08	0.85682
Q01518	Adenylyl cyclase-associated protein 1	35.36	23	9	28	8	CAP1	4.80137e+06	5.59373e+06	0.858349
Q01433	AMP deaminase 2	7.853	4	4	9	4	AMPD2	1.31969e+06	925635	1.42572
Q01105	Protein SET	54.713	46	9	75	9	SET	2.46358e+07	1.71694e+07	1.43487
Q01085	Nucleolysin TIAR	3.674	5	2	4	2	TIAL1	942949	973511	0.968606
Q01081	Splicing factor U2AF 35 kDa subunit	37.995	32	7	41	7	U2AF1	1.29653e+07	1.17906e+07	1.09963
Q00839	Heterogeneous nuclear ribonucleoprotein U	108.815	34	24	195	24	HNRNPU	8.20897e+07	8.14757e+07	1.00754
Q00796	Sorbitol dehydrogenase	89.643	55	15	108	15	SORD	1.61204e+07	1.60611e+07	1.0037
Q00765	Receptor expression-enhancing protein 5	31.416	21	7	53	7	REEP5	2.40674e+07	2.46223e+07	0.977463
Q00688	Peptidyl-prolyl cis-trans isomerase FKBP3	19.33	37	7	19	7	FKBP3	9.41103e+06	6.76402e+06	1.39134
Q00610	Clathrin heavy chain 1	288.962	41	59	355	59	CLTC	8.94804e+07	9.37431e+07	0.954528
Q00577	Transcriptional activator protein Pur-alpha	3.692	5	2	5	2	PURA	921734	896796	1.02781
Q00535	Cyclin-dependent-like kinase 5	7.047	8	3	11	2	CDK5	1.87519e+06	2.0598e+06	0.910375
Q00341	Vigilin	36.848	12	13	30	13	HDLBP	5.73223e+06	5.1065e+06	1.12254
Q00325	Phosphate carrier protein, mitochondrial	25.499	24	8	47	8	SLC25A3	1.61839e+07	1.26136e+07	1.28305
P99999	Cytochrome c	13.255	28	5	11	5	CYCS	921479	792589	1.16262
P98179	RNA-binding protein 3	9.39	27	3	6	3	RBM3	1.67459e+06	1.62513e+06	1.03043
P85037	Forkhead box protein K1	6.749	3	2	10	2	FOXK1	2.94167e+06	3.67531e+06	0.800388
P84103	Serine/arginine-rich splicing factor 3	43.727	41	7	85	6	SRSF3	4.20854e+07	3.17757e+07	1.32445
P84098	60S ribosomal protein L19	122.136	54	21	266	21	RPL19	2.84682e+08	2.248e+08	1.26638
P84090	Enhancer of rudimentary homolog	14.86	27	3	34	3	ERH	7782009	7.60544e+06	1.02322
P84085	ADP-ribosylation factor 5	76.77	75	11	135	5	ARF5	1.0854e+07	1.33308e+07	0.814206
P83731	60S ribosomal protein L24	44.998	46	9	95	9	RPL24	4.32577e+07	4.72134e+07	0.916216
P82675	28S ribosomal protein S5, mitochondrial	5.697	6	2	5	2	MRPS5	2.64781e+06	2.53525e+06	1.0444
P78527	DNA-dependent protein kinase catalytic subunit	168.789	16	56	162	56	PRKDC	3.53379e+07	3.27869e+07	1.07781
P78417	Glutathione S-transferase omega-1	76.992	51	16	171	16	GSTO1	2.55184e+07	2.83231e+07	0.900975
P78371	T-complex protein 1 subunit beta	121.232	55	22	165	22	CCT2	5.64832e+07	7.04529e+07	0.801716
P78362	SRSF protein kinase 2	16.415	11	6	11	5	SRPK2	3.7259e+06	3.26587e+06	1.14086
P78347	General transcription factor II-I	49.263	22	16	52	16	GTF2I	4.91872e+06	5.52121e+06	0.890878
P78346	Ribonuclease P protein subunit p30	14.445	19	4	10	4	RPP30	381800	322375	1.18434
P78344	Eukaryotic translation initiation factor 4 gamma 2	16.606	8	6	17	6	EIF4G2	2.18954e+06	2.37055e+06	0.923642
P69905	Hemoglobin subunit alpha	4.757	15	2	6	2	HBA1; HBA2	358080	356109	1.00553
P68402	Platelet-activating factor acetylhydrolase IB subunit alpha2	9.923	17	3	16	3	PAFAH1B2	2.46101e+06	1.83092e+06	1.34413
P68400	Casein kinase II subunit alpha	33.002	28	8	32	8	CSNK2A1	4.44497e+06	5.21817e+06	0.851826
P68371	Tubulin beta-4B chain	298.535	69	34	844	2	TUBB4B	8.49371e+08	1.05403e+09	0.805829
P68133	Actin, alpha skeletal muscle	183.95	45	22	586	4	ACTA1	1.91691e+07	1.68317e+07	1.13887
P68104	Elongation factor 1-alpha 1	291.404	72	31	1005	16	EEF1A1	7.06568e+08	8.10962e+08	0.871271
P68036	Ubiquitin-conjugating enzyme E2 L3	47.874	53	7	62	7	UBE2L3	1.28191e+07	1.23477e+07	1.03817
P67936	Tropomyosin alpha-4 chain	43.118	40	12	46	9	TPM4	8.88251e+06	9.10787e+06	0.975256
P67870	Casein kinase II subunit beta	12.783	17	3	19	3	CSNK2B	3.4486e+06	3.73266e+06	0.923898
P67812	Signal peptidase complex catalytic subunit SEC11A	8.332	16	3	22	3	SEC11A	2.39999e+06	1.78703e+06	1.343
P67809	Y-box-binding protein 1	87.948	54	14	102	14	YBX1	2.84901e+07	1.91783e+07	1.48554
P67775	Serine/threonine-protein phosphatase 2A catalytic subunit alpha isoform	24.246	30	7	26	7	PPP2CA	7.09521e+06	8.34787e+06	0.849942
P63279	SUMO-conjugating enzyme UBC9	12.053	20	4	22	4	UBE2I	4.28963e+06	6.22266e+06	0.689356
P63244	Receptor of activated protein C kinase 1	110.673	70	18	172	18	RACK1	7.22325e+07	8.52612e+07	0.847191
P63241	Eukaryotic translation initiation factor 5A-1	63.036	45	10	144	10	EIF5A	8.84355e+07	8.73513e+07	1.01241
P63220	40S ribosomal protein S21	15.202	41	3	16	3	RPS21	2.18385e+06	3.08752e+06	0.707316
P63208	S-phase kinase-associated protein 1	10.84	21	3	12	3	SKP1	1.70904e+06	1.55134e+06	1.10165
P63173	60S ribosomal protein L38	32.924	54	6	59	6	RPL38	1.24655e+07	1.34186e+07	0.928973
P63151	Serine/threonine-protein phosphatase 2A 55 kDa regulatory subunit B alpha isoform	31.616	26	9	25	9	PPP2R2A	3.78657e+07	4.81046e+07	0.787154
P63104	14-3-3 protein zeta/delta	108.864	67	20	181	15	YWHAZ	1.11993e+08	1.12725e+08	0.993508
P63000	Ras-related C3 botulinum toxin substrate 1	19.608	34	6	27	5	RAC1	5.56768e+06	5.66698e+06	0.982478
P62995	Transformer-2 protein homolog beta	44.929	25	10	77	9	TRA2B	1.73757e+07	1.43202e+07	1.21337
P62979	Ubiquitin-40S ribosomal protein S27a	94.373	67	15	226	15	RPS27A	1.48338e+08	1.41962e+08	1.04491
P62937	Peptidyl-prolyl cis-trans isomerase A	123.676	85	14	262	14	PPIA	158491072	1.68877e+08	0.938501
P62917	60S ribosomal protein L8	96.415	66	23	153	23	RPL8	1.08765e+08	1.28569e+08	0.84596
P62913	60S ribosomal protein L11	22.241	37	6	39	6	RPL11	2.05368e+07	2.52637e+07	0.8129
P62910	60S ribosomal protein L32	212.819	77	25	503	25	RPL32	4.21554e+08	6.36629e+08	0.662165
[truncated: 715 more rows]

## Sheet: TableSI-2 CP5
Modified cysteines containing proteome by CP5 in MCF-7 living cells
[truncated: 1,200 more rows]

## Sheet: TableSI-3 Hela_CP2_0.1 mM
Modified cysteine sites by 0.1 mM CP2 in Hela living cells
[truncated: 246 more rows]
